# Supplementary material for: Prediction of human genes and diseases targeted by xenobiotics using predictive toxicogenomic-derived models (PTDMs)
Source: Royal Society of Chemistry journal article supplement (doi:10.1039/c3mb25309k), 2013-02-04
Supplement: c3mb25309k.xlsx [file c3mb25309k.xlsx]

## Sheet: CGI
# ChemicalName	ChemicalID	CasRN	GeneSymbol	GeneID	Organism	OrganismID	Interaction	InteractionActions	PubMedIDs
10,11-dihydro-10,11-dihydroxy-5H-dibenzazepine-5-carboxamide	C004822	35079-97-1	EPHX1	2052	Homo sapiens	9606	[EPHX1 gene SNP affects the metabolism of carbamazepine epoxide] which affects the chemical synthesis of 10,11-dihydro-10,11-dihydroxy-5H-dibenzazepine-5-carboxamide	affects^chemical synthesis|affects^metabolic processing	15692831
10,11-dihydro-10-hydroxycarbamazepine	C039775		ABCB1	5243	Homo sapiens	9606	ABCB1 protein results in increased transport of 10,11-dihydro-10-hydroxycarbamazepine	increases^transport	16190932
103D5R	C496879		AKT1	207	Homo sapiens	9606	103D5R results in decreased phosphorylation of AKT1 protein	decreases^phosphorylation	15695405
103D5R	C496879		HIF1A	3091	Homo sapiens	9606	103D5R inhibits the reaction [cobaltous chloride results in increased expression of HIF1A protein]	decreases^reaction|increases^expression	15695405
103D5R	C496879		MAPK1	5594	Homo sapiens	9606	103D5R results in decreased phosphorylation of MAPK1 protein	decreases^phosphorylation	15695405
103D5R	C496879		MAPK3	5595	Homo sapiens	9606	103D5R results in decreased phosphorylation of MAPK3 protein	decreases^phosphorylation	15695405
103D5R	C496879		MAPK8	5599	Homo sapiens	9606	103D5R results in decreased phosphorylation of MAPK8 protein	decreases^phosphorylation	15695405
103D5R	C496879		SLC2A1	6513	Homo sapiens	9606	103D5R results in decreased expression of SLC2A1 mRNA	decreases^expression	15695405
103D5R	C496879		VEGFA	7422	Homo sapiens	9606	103D5R results in decreased expression of VEGFA mRNA	decreases^expression	15695405
10-decarbamoylmitomycin C	C067795	26909-37-5	CASP3	836	Homo sapiens	9606	10-decarbamoylmitomycin C results in increased activity of CASP3 protein	increases^activity	17530733
10-decarbamoylmitomycin C	C067795	26909-37-5	CASP9	842	Homo sapiens	9606	10-decarbamoylmitomycin C results in increased activity of CASP9 protein	increases^activity	17530733
10-decarbamoylmitomycin C	C067795	26909-37-5	CHEK1	1111	Homo sapiens	9606	10-decarbamoylmitomycin C results in decreased expression of CHEK1 protein	decreases^expression	17530733
10-(fluoroethoxyphosphinyl)-N-(biotinamidopentyl)decanamide	C403065		AZGP1	563	Homo sapiens	9606	10-(fluoroethoxyphosphinyl)-N-(biotinamidopentyl)decanamide binds to AZGP1 protein	affects^binding	19539807
10-(fluoroethoxyphosphinyl)-N-(biotinamidopentyl)decanamide	C403065		KIF3C	3797	Homo sapiens	9606	10-(fluoroethoxyphosphinyl)-N-(biotinamidopentyl)decanamide binds to KIF3C protein	affects^binding	19539807
10-(fluoroethoxyphosphinyl)-N-(biotinamidopentyl)decanamide	C403065		KRT1	3848	Homo sapiens	9606	10-(fluoroethoxyphosphinyl)-N-(biotinamidopentyl)decanamide binds to KRT1 protein	affects^binding	19539807
10-hydroxycamptothecin	C028098	67656-30-8	BCL2	596	Homo sapiens	9606	BCL2 protein affects the susceptibility to 10-hydroxycamptothecin	affects^response to substance	16603448
10-hydroxycamptothecin	C028098	67656-30-8	BCL2L1	598	Homo sapiens	9606	BCL2L1 protein affects the susceptibility to 10-hydroxycamptothecin	affects^response to substance	17033717
10-hydroxycamptothecin	C028098	67656-30-8	CASP3	836	Homo sapiens	9606	[10-hydroxycamptothecin co-treated with Fluorouracil co-treated with Leucovorin] results in increased activity of CASP3 protein	affects^cotreatment|increases^activity	12934351
10-hydroxycamptothecin	C028098	67656-30-8	MDM2	4193	Homo sapiens	9606	MDM2 protein affects the susceptibility to 10-hydroxycamptothecin	affects^response to substance	13130078
10-hydroxynortriptyline	C013567	1156-99-6	CYP2D6	1565	Homo sapiens	9606	CYP2D6 gene mutant form results in increased abundance of 10-hydroxynortriptyline	increases^abundance	11673748
10-hydroxywarfarin	C065719	83219-99-2	CYP3A4	1576	Homo sapiens	9606	CYP3A4 protein affects the chemical synthesis of 10-hydroxywarfarin	affects^chemical synthesis	16035367
1,10-phenanthroline	C025205	66-71-7	AKR1C1	1645	Homo sapiens	9606	1,10-phenanthroline results in decreased activity of AKR1C1 protein	decreases^activity	12604236
1,10-phenanthroline	C025205	66-71-7	AKR1C2	1646	Homo sapiens	9606	1,10-phenanthroline results in decreased activity of AKR1C2 protein	decreases^activity	12604236
1,10-phenanthroline	C025205	66-71-7	AKR1C3	8644	Homo sapiens	9606	1,10-phenanthroline results in decreased activity of AKR1C3 protein	decreases^activity	12604236
1,10-phenanthroline	C025205	66-71-7	AKR1C4	1109	Homo sapiens	9606	1,10-phenanthroline results in decreased activity of AKR1C4 protein	decreases^activity	12604236
1,10-phenanthroline	C025205	66-71-7	ANPEP	290	Homo sapiens	9606	1,10-phenanthroline results in decreased activity of ANPEP protein	decreases^activity	17109655
1,10-phenanthroline	C025205	66-71-7	ASPA	443	Homo sapiens	9606	1,10-phenanthroline results in decreased activity of ASPA protein	decreases^activity	17027983
1,10-phenanthroline	C025205	66-71-7	ATF6	22926	Homo sapiens	9606	[1,10-phenanthroline results in decreased activity of MBTPS2 protein] which affects the localization of ATF6 protein	affects^localization|decreases^activity	21355074
1,10-phenanthroline	C025205	66-71-7	CFTR	1080	Homo sapiens	9606	1,10-phenanthroline results in increased activity of CFTR protein	increases^activity	15921678
1,10-phenanthroline	C025205	66-71-7	HIF1A	3091	Homo sapiens	9606	4'-O-methylalpinumisoflavone inhibits the reaction [1,10-phenanthroline deficiency results in increased activity of HIF1A protein]	decreases^reaction|increases^activity	19091749
1,10-phenanthroline	C025205	66-71-7	ICAM1	3383	Homo sapiens	9606	1,10-phenanthroline affects the reaction [Smoke results in increased expression of ICAM1 protein]	affects^reaction|increases^expression	15560890
1,10-phenanthroline	C025205	66-71-7	LAMC2	3918	Homo sapiens	9606	1,10-phenanthroline inhibits the reaction [Mustard Gas results in increased degradation of LAMC2 protein]	decreases^reaction|increases^degradation	18095945
1,10-phenanthroline	C025205	66-71-7	MBTPS2	51360	Homo sapiens	9606	[1,10-phenanthroline results in decreased activity of MBTPS2 protein] which affects the localization of ATF6 protein	affects^localization|decreases^activity	21355074
1,10-phenanthroline	C025205	66-71-7	MMP8	4317	Homo sapiens	9606	1,10-phenanthroline results in decreased activity of MMP8 protein	decreases^activity	15057751
1,10-phenanthroline	C025205	66-71-7	SELE	6401	Homo sapiens	9606	1,10-phenanthroline affects the reaction [Smoke results in increased expression of SELE protein]	affects^reaction|increases^expression	15560890
1,10-phenanthroline	C025205	66-71-7	SOD1	6647	Homo sapiens	9606	1,10-phenanthroline inhibits the reaction [[Hydrogen Peroxide co-treated with Nitroprusside] results in decreased expression of SOD1 protein]	affects^cotreatment|decreases^expression|decreases^reaction	20674559
1,10-phenanthroline	C025205	66-71-7	SOD2	6648	Homo sapiens	9606	1,10-phenanthroline inhibits the reaction [[Hydrogen Peroxide co-treated with Nitroprusside] results in increased expression of SOD2 protein]	affects^cotreatment|decreases^reaction|increases^expression	20674559
1,10-phenanthroline	C025205	66-71-7	SREBF1	6720	Homo sapiens	9606	[1,10-phenanthroline results in decreased activity of MBTPS2 protein] which affects the localization of SREBF1 protein	affects^localization|decreases^activity	21355074
11,11'-dideoxyverticilin	C490191		CHEK2	11200	Homo sapiens	9606	11,11'-dideoxyverticilin results in increased phosphorylation of CHEK2 protein	increases^phosphorylation	15963507
11,11'-dideoxyverticilin	C490191		MAPK14	1432	Homo sapiens	9606	11,11'-dideoxyverticilin results in increased expression of and results in increased phosphorylation of MAPK14 protein	increases^expression|increases^phosphorylation	15963507
11,11'-dideoxyverticilin	C490191		TP53	7157	Homo sapiens	9606	11,11'-dideoxyverticilin results in increased expression of and results in increased phosphorylation of TP53 protein	increases^expression|increases^phosphorylation	15963507
11,12-epoxy-5,8,14-eicosatrienoic acid	C046783	81276-02-0	AKT1	207	Homo sapiens	9606	11,12-epoxy-5,8,14-eicosatrienoic acid inhibits the reaction [Terfenadine analog results in decreased phosphorylation of AKT1 protein]	decreases^phosphorylation|decreases^reaction	19289568
11,12-epoxy-5,8,14-eicosatrienoic acid	C046783	81276-02-0	CD82	3732	Homo sapiens	9606	11,12-epoxy-5,8,14-eicosatrienoic acid inhibits the reaction [Terfenadine analog results in increased expression of CD82 protein]	decreases^reaction|increases^expression	19289568
11,12-epoxy-5,8,14-eicosatrienoic acid	C046783	81276-02-0	EGFR	1956	Homo sapiens	9606	11,12-epoxy-5,8,14-eicosatrienoic acid inhibits the reaction [Terfenadine analog results in decreased phosphorylation of EGFR protein]	decreases^phosphorylation|decreases^reaction	19289568
11,12-epoxy-5,8,14-eicosatrienoic acid	C046783	81276-02-0	NME1	4830	Homo sapiens	9606	11,12-epoxy-5,8,14-eicosatrienoic acid inhibits the reaction [Terfenadine analog results in increased expression of NME1 protein]	decreases^reaction|increases^expression	19289568
11,15-dioxo-9-hydroxy-2,3,4,5-tetranorprostan-1,20-dioic acid	C527346		PTGS1	5742	Homo sapiens	9606	PTGS1 protein results in increased abundance of 11,15-dioxo-9-hydroxy-2,3,4,5-tetranorprostan-1,20-dioic acid	increases^abundance	17993463
111In-DOTA-TOC	C507387		SSTR2	6752	Homo sapiens	9606	111In-DOTA-TOC binds to SSTR2 protein	affects^binding	10353735
1,1,1-trichloro-2-(4-hydroxyphenyl)-2-(4-methoxyphenyl)ethane	C495657		CYP1A2	1544	Homo sapiens	9606	CYP1A2 protein results in increased chemical synthesis of 1,1,1-trichloro-2-(4-hydroxyphenyl)-2-(4-methoxyphenyl)ethane	increases^chemical synthesis	9733665
1,1,1-trichloro-2-(4-hydroxyphenyl)-2-(4-methoxyphenyl)ethane	C495657		CYP2A6	1548	Homo sapiens	9606	CYP2A6 protein results in increased chemical synthesis of 1,1,1-trichloro-2-(4-hydroxyphenyl)-2-(4-methoxyphenyl)ethane	increases^chemical synthesis	9733665
1,1,1-trichloro-2-(4-hydroxyphenyl)-2-(4-methoxyphenyl)ethane	C495657		CYP2B6	1555	Homo sapiens	9606	CYP2B6 protein results in increased chemical synthesis of 1,1,1-trichloro-2-(4-hydroxyphenyl)-2-(4-methoxyphenyl)ethane	increases^chemical synthesis	9733665
1,1,1-trichloro-2-(4-hydroxyphenyl)-2-(4-methoxyphenyl)ethane	C495657		CYP2C18	1562	Homo sapiens	9606	CYP2C18 protein results in increased chemical synthesis of 1,1,1-trichloro-2-(4-hydroxyphenyl)-2-(4-methoxyphenyl)ethane	increases^chemical synthesis	9733665
1,1,1-trichloro-2-(4-hydroxyphenyl)-2-(4-methoxyphenyl)ethane	C495657		CYP2C19	1557	Homo sapiens	9606	CYP2C19 protein results in increased chemical synthesis of 1,1,1-trichloro-2-(4-hydroxyphenyl)-2-(4-methoxyphenyl)ethane	increases^chemical synthesis	9714305|9733665
1,1,1-trichloro-2-(4-hydroxyphenyl)-2-(4-methoxyphenyl)ethane	C495657		CYP2C9	1559	Homo sapiens	9606	CYP2C9 protein results in increased chemical synthesis of 1,1,1-trichloro-2-(4-hydroxyphenyl)-2-(4-methoxyphenyl)ethane	increases^chemical synthesis	9733665
1,1,1-trichloro-2-(4-hydroxyphenyl)-2-(4-methoxyphenyl)ethane	C495657		CYP2D6	1565	Homo sapiens	9606	CYP2D6 protein results in increased hydroxylation of 1,1,1-trichloro-2-(4-hydroxyphenyl)-2-(4-methoxyphenyl)ethane	increases^hydroxylation	9047321
1,1,1-trichloro-2-(4-hydroxyphenyl)-2-(4-methoxyphenyl)ethane	C495657		CYP2E1	1571	Homo sapiens	9606	CYP2E1 protein results in increased hydroxylation of 1,1,1-trichloro-2-(4-hydroxyphenyl)-2-(4-methoxyphenyl)ethane	increases^hydroxylation	9047321
1,1,1-trichloro-2-(4-hydroxyphenyl)-2-(4-methoxyphenyl)ethane	C495657		CYP3A4	1576	Homo sapiens	9606	CYP3A4 protein results in increased hydroxylation of 1,1,1-trichloro-2-(4-hydroxyphenyl)-2-(4-methoxyphenyl)ethane	increases^hydroxylation	9714305|9047321
1,1,1-trichloroethane	C024566	71-55-6	GABRA1	2554	Homo sapiens	9606	1,1,1-trichloroethane promotes the reaction [gamma-Aminobutyric Acid results in increased activity of [GABRA1 protein binds to GABRB1 protein]]	affects^binding|increases^activity|increases^reaction	10825391
1,1,1-trichloroethane	C024566	71-55-6	GABRB1	2560	Homo sapiens	9606	1,1,1-trichloroethane promotes the reaction [gamma-Aminobutyric Acid results in increased activity of [GABRA1 protein binds to GABRB1 protein]]	affects^binding|increases^activity|increases^reaction	10825391
1,1,1-trichloroethane	C024566	71-55-6	GLRA1	2741	Homo sapiens	9606	1,1,1-trichloroethane promotes the reaction [Glycine Agents results in increased activity of GLRA1 protein mutant form]	increases^activity|increases^reaction	10825391
1,12-benzoperylene	C006718	191-24-2	AHR	196	Homo sapiens	9606	1,12-benzoperylene affects the localization of AHR protein	affects^localization	11141357
1,12-benzoperylene	C006718	191-24-2	CYP1A1	1543	Homo sapiens	9606	[Benzo(a)pyrene co-treated with 1,12-benzoperylene] results in increased expression of CYP1A1 mRNA	affects^cotreatment|increases^expression	11141357
1,12-benzoperylene	C006718	191-24-2	PARP1	142	Homo sapiens	9606	1,12-benzoperylene results in increased cleavage of PARP1 protein	increases^cleavage	21132278
1,1-bis(3'-indolyl)-1-(4-trifluoromethylphenyl)methane	C492909		CDKN1A	1026	Homo sapiens	9606	1,1-bis(3'-indolyl)-1-(4-trifluoromethylphenyl)methane results in increased expression of CDKN1A mRNA	increases^expression	15345676
1,1-bis(3'-indolyl)-1-(4-trifluoromethylphenyl)methane	C492909		PPARG	5468	Homo sapiens	9606	1,1-bis(3'-indolyl)-1-(4-trifluoromethylphenyl)methane results in increased activity of PPARG protein	increases^activity	15345676
1,1-bis(3'-indolyl)-1-(4-trifluoromethylphenyl)methane	C492909		RB1	5925	Homo sapiens	9606	1,1-bis(3'-indolyl)-1-(4-trifluoromethylphenyl)methane results in decreased phosphorylation of RB1 protein	decreases^phosphorylation	15345676
1,1-bis(3'-indolyl)-1-(4-trifluoromethylphenyl)methane	C492909		SP1	6667	Homo sapiens	9606	SP1 protein affects the reaction [1,1-bis(3'-indolyl)-1-(4-trifluoromethylphenyl)methane results in increased expression of CDKN1A protein]	affects^reaction|increases^expression	15345676
1,1-bis(3'-indolyl)-1-(4-trifluoromethylphenyl)methane	C492909		SP4	6671	Homo sapiens	9606	SP4 protein affects the reaction [1,1-bis(3'-indolyl)-1-(4-trifluoromethylphenyl)methane results in increased expression of CDKN1A protein]	affects^reaction|increases^expression	15345676
11-(dansylamino)undecanoic acid	C054400	73025-02-2	AMBP	259	Homo sapiens	9606	11-(dansylamino)undecanoic acid binds to AMBP protein	affects^binding	16461020
11-(dansylamino)undecanoic acid	C054400	73025-02-2	APOD	347	Homo sapiens	9606	11-(dansylamino)undecanoic acid binds to APOD protein	affects^binding	16461020
11-(dansylamino)undecanoic acid	C054400	73025-02-2	C8G	733	Homo sapiens	9606	11-(dansylamino)undecanoic acid binds to C8G protein	affects^binding	16461020
11-(dansylamino)undecanoic acid	C054400	73025-02-2	LCN1	3933	Homo sapiens	9606	11-(dansylamino)undecanoic acid binds to LCN1 protein	affects^binding	16461020
11-(dansylamino)undecanoic acid	C054400	73025-02-2	OBP2A	29991	Homo sapiens	9606	11-(dansylamino)undecanoic acid binds to OBP2A protein	affects^binding	16461020
11-(dansylamino)undecanoic acid	C054400	73025-02-2	ORM1	5004	Homo sapiens	9606	11-(dansylamino)undecanoic acid binds to ORM1 protein	affects^binding	16461020
11-(dansylamino)undecanoic acid	C054400	73025-02-2	PTGDS	5730	Homo sapiens	9606	11-(dansylamino)undecanoic acid binds to PTGDS protein	affects^binding	16461020
11-deoxyprostaglandin E1	C034008	37786-00-8	TNF	7124	Homo sapiens	9606	11-deoxyprostaglandin E1 inhibits the reaction [Lipopolysaccharides results in increased expression of TNF]	decreases^reaction|increases^expression	9298541
1,1-diethyl-2-hydroxy-2-nitrosohydrazine	C084012	86831-65-4	CALCA	796	Homo sapiens	9606	1,1-diethyl-2-hydroxy-2-nitrosohydrazine results in increased expression of CALCA protein	increases^expression	16996168
1-(1-methylethyl)-4-((1-(6-(trifluoromethyl)-3-pyridinyl)-4-piperidinyl)carbonyl)hexahydro-1H-1,4-diazepine	C519817		HRH3	11255	Homo sapiens	9606	1-(1-methylethyl)-4-((1-(6-(trifluoromethyl)-3-pyridinyl)-4-piperidinyl)carbonyl)hexahydro-1H-1,4-diazepine binds to and results in decreased activity of HRH3 protein	affects^binding|decreases^activity	17276409
1-(2-(3-(4-methoxyphenyl)propoxy)-4-methoxyphenylethyl)-1H-imidazole	C063159	130495-35-1	BIRC3	330	Homo sapiens	9606	1-(2-(3-(4-methoxyphenyl)propoxy)-4-methoxyphenylethyl)-1H-imidazole inhibits the reaction [Lipopolysaccharides results in increased expression of BIRC3 protein]	decreases^reaction|increases^expression	16154993
1-(2-(3-(4-methoxyphenyl)propoxy)-4-methoxyphenylethyl)-1H-imidazole	C063159	130495-35-1	TNF	7124	Homo sapiens	9606	1-(2-(3-(4-methoxyphenyl)propoxy)-4-methoxyphenylethyl)-1H-imidazole inhibits the reaction [TNF protein results in increased expression of BIRC3 protein]	decreases^reaction|increases^expression	16154993
1,2,3,4-tetrahydro-1-(phenylmethyl)isoquinoline	C084924	19716-56-4	SNCA	6622	Homo sapiens	9606	1,2,3,4-tetrahydro-1-(phenylmethyl)isoquinoline results in increased expression of SNCA mRNA	increases^expression	15114628
1,2,3,4-tetrahydroisoquinoline	C014843	91-21-4	DRD3	1814	Homo sapiens	9606	1,2,3,4-tetrahydroisoquinoline analog binds to DRD3 protein	affects^binding	15185375
1,2,3,4-tetrahydroisoquinoline-3-carboxylic acid	C078986	35186-99-3	CFTR	1080	Homo sapiens	9606	1,2,3,4-tetrahydroisoquinoline-3-carboxylic acid analog results in increased activity of CFTR protein mutant form	increases^activity	15808474
1,2,3,5-tetrachlorobenzene	C030387	634-90-2	CYP2E1	1571	Homo sapiens	9606	CYP2E1 protein results in increased metabolism of 1,2,3,5-tetrachlorobenzene	increases^metabolic processing	7747284
1,2,3,5-tetrachlorobenzene	C030387	634-90-2	CYP3A4	1576	Homo sapiens	9606	CYP3A4 protein results in increased oxidation of 1,2,3,5-tetrachlorobenzene	increases^oxidation	7747284
1-(2,3-dichlorobenzoyl)-5-methoxy-2-methyl-(2-(mopholin-4-yl)ethyl)-1H-indole	C463040		XBP1	7494	Homo sapiens	9606	1-(2,3-dichlorobenzoyl)-5-methoxy-2-methyl-(2-(mopholin-4-yl)ethyl)-1H-indole results in increased expression of XBP1 mRNA	increases^expression	21525939
1-(2-(3-methoxyphenyl)ethyl)phenoxy-3-(dimethylamino)-2-propanol	C099060	127003-40-1	ADRA1A	148	Homo sapiens	9606	1-(2-(3-methoxyphenyl)ethyl)phenoxy-3-(dimethylamino)-2-propanol inhibits the reaction [Prazosin binds to ADRA1A protein]	affects^binding|decreases^reaction	11937776
1-(2-(3-methoxyphenyl)ethyl)phenoxy-3-(dimethylamino)-2-propanol	C099060	127003-40-1	ADRA1B	147	Homo sapiens	9606	1-(2-(3-methoxyphenyl)ethyl)phenoxy-3-(dimethylamino)-2-propanol inhibits the reaction [Prazosin binds to ADRA1B protein]	affects^binding|decreases^reaction	11937776
1-(2-(3-methoxyphenyl)ethyl)phenoxy-3-(dimethylamino)-2-propanol	C099060	127003-40-1	ADRA1D	146	Homo sapiens	9606	1-(2-(3-methoxyphenyl)ethyl)phenoxy-3-(dimethylamino)-2-propanol inhibits the reaction [Prazosin binds to ADRA1D protein]	affects^binding|decreases^reaction	11937776
1,24,25-trihydroxyvitamin D3	C013721	50648-94-7	CYP24A1	1591	Homo sapiens	9606	1,24,25-trihydroxyvitamin D3 results in increased expression of CYP24A1 mRNA	increases^expression	7530193
1,24,25-trihydroxyvitamin D3	C013721	50648-94-7	VDR	7421	Homo sapiens	9606	1,24,25-trihydroxyvitamin D3 affects the reaction [Calcitriol binds to VDR protein]	affects^binding|affects^reaction	7530193
1,24-dihydroxyvitamin D2	C063087	124043-51-2	VDR	7421	Homo sapiens	9606	1,24-dihydroxyvitamin D2 binds to VDR protein	affects^binding	10927029
1,2,4-triazolo(1,5-c)pyrimidine	C494034		ADORA2A	135	Homo sapiens	9606	1,2,4-triazolo(1,5-c)pyrimidine analog binds to and results in decreased activity of ADORA2A protein	affects^binding|decreases^activity	19109019
1,2,4-trichlorobenzene	C009947	120-82-1	CYP1A1	1543	Homo sapiens	9606	CYP1A1 protein results in increased oxidation of 1,2,4-trichlorobenzene	increases^oxidation	7747284
1,2,4-trichlorobenzene	C009947	120-82-1	CYP1A2	1544	Homo sapiens	9606	CYP1A2 protein results in increased oxidation of 1,2,4-trichlorobenzene	increases^oxidation	7747284
1,2,4-trichlorobenzene	C009947	120-82-1	CYP2E1	1571	Homo sapiens	9606	CYP2E1 protein results in increased metabolism of 1,2,4-trichlorobenzene	increases^metabolic processing	7747284
1,2,4-trihydroxy-9,10-anthracenedione	C410870	81-54-9	CYP1A1	1543	Homo sapiens	9606	1,2,4-trihydroxy-9,10-anthracenedione results in decreased activity of CYP1A1 protein	decreases^activity	12379470
1,2,4-trihydroxy-9,10-anthracenedione	C410870	81-54-9	CYP1A2	1544	Homo sapiens	9606	1,2,4-trihydroxy-9,10-anthracenedione results in decreased activity of CYP1A2 protein	decreases^activity	12379470
1,2,4-trihydroxy-9,10-anthracenedione	C410870	81-54-9	CYP1B1	1545	Homo sapiens	9606	1,2,4-trihydroxy-9,10-anthracenedione results in decreased activity of CYP1B1 protein	decreases^activity	12379470
1,2,4-trihydroxy-9,10-anthracenedione	C410870	81-54-9	CYP2A6	1548	Homo sapiens	9606	1,2,4-trihydroxy-9,10-anthracenedione results in decreased activity of CYP2A6 protein	decreases^activity	12379470
1,2,4-trihydroxy-9,10-anthracenedione	C410870	81-54-9	CYP2E1	1571	Homo sapiens	9606	1,2,4-trihydroxy-9,10-anthracenedione results in decreased activity of CYP2E1 protein	decreases^activity	12379470
1,2,5,6-dibenzanthracene	C026486	53-70-3	AHR	196	Homo sapiens	9606	1,2,5,6-dibenzanthracene binds to and results in increased activity of AHR protein	affects^binding|increases^activity	15997229
1,2,5,6-dibenzanthracene	C026486	53-70-3	AR	367	Homo sapiens	9606	1,2,5,6-dibenzanthracene binds to and results in increased activity of AR protein	affects^binding|increases^activity	10771140
1,2,5,6-dibenzanthracene	C026486	53-70-3	CYP1A1	1543	Homo sapiens	9606	[CYP1A1 protein co-treated with Trichloroepoxypropane] results in increased metabolism of 1,2,5,6-dibenzanthracene	affects^cotreatment|increases^metabolic processing	8961944
1,2,5,6-dibenzanthracene	C026486	53-70-3	CYP1A2	1544	Homo sapiens	9606	[CYP1A2 protein co-treated with Trichloroepoxypropane] results in increased metabolism of 1,2,5,6-dibenzanthracene	affects^cotreatment|increases^metabolic processing	8961944
1,2,5,6-dibenzanthracene	C026486	53-70-3	CYP1B1	1545	Homo sapiens	9606	1,2,5,6-dibenzanthracene results in increased expression of CYP1B1 mRNA	increases^expression	19358281
1,2,5,6-dibenzanthracene	C026486	53-70-3	EPHX1	2052	Homo sapiens	9606	EPHX1 protein promotes the reaction [CYP1A1 protein results in increased metabolism of 1,2,5,6-dibenzanthracene]	increases^metabolic processing|increases^reaction	8961944
1,2,5,6-dibenzanthracene	C026486	53-70-3	FGF9	2254	Homo sapiens	9606	1,2,5,6-dibenzanthracene results in increased expression of FGF9 mRNA	increases^expression	19358281
1,2,5,6-dibenzanthracene	C026486	53-70-3	GSTA1	2938	Homo sapiens	9606	GSTA1 protein affects the metabolism of and results in decreased susceptibility to 1,2,5,6-dibenzanthracene	affects^metabolic processing|decreases^response to substance	11673082
1,2,5,6-dibenzanthracene	C026486	53-70-3	GSTM1	2944	Homo sapiens	9606	GSTM1 protein affects the metabolism of [1,2,5,6-dibenzanthracene co-treated with Glutathione]	affects^cotreatment|affects^metabolic processing	9403173
1,25-dihydroxy-16-ene-vitamin D3	C087630	124409-58-1	CYP24A1	1591	Homo sapiens	9606	1,25-dihydroxy-16-ene-vitamin D3 results in increased expression of CYP24A1 mRNA	increases^expression	7530193
1,25-dihydroxyvitamin D	C097949	66772-14-3	BAX	581	Homo sapiens	9606	1,25-dihydroxyvitamin D affects the localization of BAX protein	affects^localization	16061374
1,25-dihydroxyvitamin D	C097949	66772-14-3	CCL5	6352	Homo sapiens	9606	1,25-dihydroxyvitamin D inhibits the reaction [Lipopolysaccharides results in increased secretion of CCL5 protein]	decreases^reaction|increases^secretion	16367934
1,25-dihydroxyvitamin D	C097949	66772-14-3	COL1A1	1277	Homo sapiens	9606	U 0126 inhibits the reaction [1,25-dihydroxyvitamin D results in increased expression of COL1A1 mRNA]	decreases^reaction|increases^expression	15331595
1,25-dihydroxyvitamin D	C097949	66772-14-3	CYP24A1	1591	Homo sapiens	9606	U 0126 inhibits the reaction [1,25-dihydroxyvitamin D results in increased expression of CYP24A1 mRNA]	decreases^reaction|increases^expression	15331595
1,25-dihydroxyvitamin D	C097949	66772-14-3	IL6	3569	Homo sapiens	9606	1,25-dihydroxyvitamin D inhibits the reaction [Lipopolysaccharides results in increased secretion of IL6 protein]	decreases^reaction|increases^secretion	16367934
1,25-dihydroxyvitamin D	C097949	66772-14-3	IL8	3576	Homo sapiens	9606	1,25-dihydroxyvitamin D inhibits the reaction [Lipopolysaccharides results in increased secretion of IL8 protein]	decreases^reaction|increases^secretion	16367934
1,25-dihydroxyvitamin D	C097949	66772-14-3	MAPK1	5594	Homo sapiens	9606	1,25-dihydroxyvitamin D results in increased phosphorylation of and results in increased activity of MAPK1 protein	increases^activity|increases^phosphorylation	15331595
1,25-dihydroxyvitamin D	C097949	66772-14-3	MAPK3	5595	Homo sapiens	9606	1,25-dihydroxyvitamin D results in increased phosphorylation of and results in increased activity of MAPK3 protein	increases^activity|increases^phosphorylation	15331595
1,25-dihydroxyvitamin D	C097949	66772-14-3	MED1	5469	Homo sapiens	9606	[1,25-dihydroxyvitamin D co-treated with Okadaic Acid] promotes the reaction [VDR protein mutant form binds to MED1 protein]	affects^binding|affects^cotreatment|increases^reaction	16059639
1,25-dihydroxyvitamin D	C097949	66772-14-3	NPPA	4878	Homo sapiens	9606	1,25-dihydroxyvitamin D results in decreased expression of NPPA mRNA	decreases^expression	15837528
1,25-dihydroxyvitamin D	C097949	66772-14-3	PTH	5741	Homo sapiens	9606	1,25-dihydroxyvitamin D results in decreased expression of PTH protein	decreases^expression	10638776
1,25-dihydroxyvitamin D	C097949	66772-14-3	PTHLH	5744	Homo sapiens	9606	1,25-dihydroxyvitamin D results in decreased expression of PTHLH protein	decreases^expression	10638776
1,25-dihydroxyvitamin D	C097949	66772-14-3	RXRA	6256	Homo sapiens	9606	1,25-dihydroxyvitamin D promotes the reaction [VDR protein binds to RXRA protein]	affects^binding|increases^reaction	15837528
1,25-dihydroxyvitamin D	C097949	66772-14-3	TRPV6	55503	Homo sapiens	9606	1,25-dihydroxyvitamin D results in increased expression of TRPV6 mRNA	increases^expression	16362534
1,25-dihydroxyvitamin D	C097949	66772-14-3	TXN	7295	Homo sapiens	9606	1,25-dihydroxyvitamin D affects the localization of TXN protein	affects^localization	16061374
1,25-dihydroxyvitamin D	C097949	66772-14-3	TXNIP	10628	Homo sapiens	9606	1,25-dihydroxyvitamin D results in increased expression of TXNIP mRNA	increases^expression	16061374
1,25-dihydroxyvitamin D	C097949	66772-14-3	VDR	7421	Homo sapiens	9606	1,25-dihydroxyvitamin D binds to VDR protein	affects^binding	15837528
1,25(OH)2-16-ene-23-yne-26,27-hexafluoro-19-nor-D3	C408047		MED1	5469	Homo sapiens	9606	1,25(OH)2-16-ene-23-yne-26,27-hexafluoro-19-nor-D3 promotes the reaction [VDR protein mutant form binds to MED1 protein]	affects^binding|increases^reaction	16059639
1,25(OH)2-16-ene-23-yne-26,27-hexafluoro-19-nor-D3	C408047		NCOA2	10499	Homo sapiens	9606	1,25(OH)2-16-ene-23-yne-26,27-hexafluoro-19-nor-D3 promotes the reaction [VDR protein mutant form binds to NCOA2 protein]	affects^binding|increases^reaction	16059639
1,25(OH)2-16-ene-23-yne-26,27-hexafluoro-19-nor-D3	C408047		VDR	7421	Homo sapiens	9606	1,25(OH)2-16-ene-23-yne-26,27-hexafluoro-19-nor-D3 promotes the reaction [VDR protein mutant form binds to MED1 protein]	affects^binding|increases^reaction	16059639
1,2-benzisothiazoline-3-one	C015699	2634-33-5	E2F1	1869	Homo sapiens	9606	1,2-benzisothiazoline-3-one inhibits the reaction [Estradiol results in increased expression of E2F1 mRNA]	decreases^reaction|increases^expression	14702633
1,2-benzisothiazoline-3-one	C015699	2634-33-5	ESR1	2099	Homo sapiens	9606	1,2-benzisothiazoline-3-one inhibits the reaction [Estradiol results in increased activity of ESR1 protein]	decreases^reaction|increases^activity	14702633
(1,2-bis(1,2-benzisoselenazolone-3(2H)-ketone))ethane	C478160		BAX	581	Homo sapiens	9606	(1,2-bis(1,2-benzisoselenazolone-3(2H)-ketone))ethane results in increased expression of BAX protein	increases^expression	15982805
(1,2-bis(1,2-benzisoselenazolone-3(2H)-ketone))ethane	C478160		BCL2	596	Homo sapiens	9606	(1,2-bis(1,2-benzisoselenazolone-3(2H)-ketone))ethane results in decreased expression of BCL2 protein	decreases^expression	15982805
(1,2-bis(1,2-benzisoselenazolone-3(2H)-ketone))ethane	C478160		CASP3	836	Homo sapiens	9606	(1,2-bis(1,2-benzisoselenazolone-3(2H)-ketone))ethane results in decreased expression of CASP3 protein	decreases^expression	15982805
(1,2-bis(1,2-benzisoselenazolone-3(2H)-ketone))ethane	C478160		TXNRD1	7296	Homo sapiens	9606	(1,2-bis(1,2-benzisoselenazolone-3(2H)-ketone))ethane results in decreased activity of TXNRD1 protein	decreases^activity	15982805
1,2-bis(2-aminophenoxy)ethane-N,N,N',N'-tetraacetic acid	C025603	85233-19-8	BID	637	Homo sapiens	9606	1,2-bis(2-aminophenoxy)ethane-N,N,N',N'-tetraacetic acid inhibits the reaction [Diclofenac results in increased activity of BID protein]	decreases^reaction|increases^activity	18191430
1,2-bis(2-aminophenoxy)ethane-N,N,N',N'-tetraacetic acid	C025603	85233-19-8	CASP3	836	Homo sapiens	9606	1,2-bis(2-aminophenoxy)ethane-N,N,N',N'-tetraacetic acid inhibits the reaction [Pilocarpine results in increased activity of CASP3 protein]	decreases^reaction|increases^activity	19927300
1,2-bis(2-aminophenoxy)ethane-N,N,N',N'-tetraacetic acid	C025603	85233-19-8	MAPK8	5599	Homo sapiens	9606	1,2-bis(2-aminophenoxy)ethane-N,N,N',N'-tetraacetic acid inhibits the reaction [Pilocarpine results in increased activity of MAPK8 protein]	decreases^reaction|increases^activity	19927300
1,2-bis(2-aminophenoxy)ethane-N,N,N',N'-tetraacetic acid	C025603	85233-19-8	MMP9	4318	Homo sapiens	9606	1,2-bis(2-aminophenoxy)ethane-N,N,N',N'-tetraacetic acid inhibits the reaction [Acrolein results in increased expression of MMP9 protein]	decreases^reaction|increases^expression	19371603
1,2-bis(2-aminophenoxy)ethane-N,N,N',N'-tetraacetic acid	C025603	85233-19-8	XIAP	331	Homo sapiens	9606	1,2-bis(2-aminophenoxy)ethane-N,N,N',N'-tetraacetic acid results in decreased degradation of XIAP protein	decreases^degradation	16223472
1,2-bis(2-aminophenoxy)ethane N,N,N',N'-tetraacetic acid acetoxymethyl ester	C070379	139890-68-9	AKT1	207	Homo sapiens	9606	1,2-bis(2-aminophenoxy)ethane N,N,N',N'-tetraacetic acid acetoxymethyl ester inhibits the reaction [P2RY1 protein results in increased phosphorylation of and results in increased activity of AKT1 protein]	decreases^reaction|increases^activity|increases^phosphorylation	16236484
1,2-bis(2-aminophenoxy)ethane N,N,N',N'-tetraacetic acid acetoxymethyl ester	C070379	139890-68-9	CAMP	820	Homo sapiens	9606	1,2-bis(2-aminophenoxy)ethane N,N,N',N'-tetraacetic acid acetoxymethyl ester inhibits the reaction [Calcitriol affects the localization of CAMP protein]	affects^localization|decreases^reaction	19748465
1,2-bis(2-aminophenoxy)ethane N,N,N',N'-tetraacetic acid acetoxymethyl ester	C070379	139890-68-9	CASP12	100506742	Homo sapiens	9606	1,2-bis(2-aminophenoxy)ethane N,N,N',N'-tetraacetic acid acetoxymethyl ester inhibits the reaction [Cadmium results in increased cleavage of and results in increased activity of CASP12 protein]	decreases^reaction|increases^activity|increases^cleavage	19442655
1,2-bis(2-aminophenoxy)ethane N,N,N',N'-tetraacetic acid acetoxymethyl ester	C070379	139890-68-9	CASP3	836	Homo sapiens	9606	1,2-bis(2-aminophenoxy)ethane N,N,N',N'-tetraacetic acid acetoxymethyl ester inhibits the reaction [Cadmium results in increased cleavage of and results in increased activity of CASP3 protein]	decreases^reaction|increases^activity|increases^cleavage	19442655
1,2-bis(2-aminophenoxy)ethane N,N,N',N'-tetraacetic acid acetoxymethyl ester	C070379	139890-68-9	CCL1	6346	Homo sapiens	9606	1,2-bis(2-aminophenoxy)ethane N,N,N',N'-tetraacetic acid acetoxymethyl ester inhibits the reaction [Benzo(a)pyrene results in increased expression of CCL1 mRNA]	decreases^reaction|increases^expression	16679317
1,2-bis(2-aminophenoxy)ethane N,N,N',N'-tetraacetic acid acetoxymethyl ester	C070379	139890-68-9	CFTR	1080	Homo sapiens	9606	1,2-bis(2-aminophenoxy)ethane N,N,N',N'-tetraacetic acid acetoxymethyl ester inhibits the reaction [tetramethylpyrazine results in increased activity of CFTR protein]	decreases^reaction|increases^activity	15763242
1,2-bis(2-aminophenoxy)ethane N,N,N',N'-tetraacetic acid acetoxymethyl ester	C070379	139890-68-9	CHRNA5	1138	Homo sapiens	9606	1,2-bis(2-aminophenoxy)ethane N,N,N',N'-tetraacetic acid acetoxymethyl ester inhibits the reaction [Nicotine results in increased expression of CHRNA5 mRNA]	decreases^reaction|increases^expression	18450646
1,2-bis(2-aminophenoxy)ethane N,N,N',N'-tetraacetic acid acetoxymethyl ester	C070379	139890-68-9	CHRNA7	1139	Homo sapiens	9606	1,2-bis(2-aminophenoxy)ethane N,N,N',N'-tetraacetic acid acetoxymethyl ester inhibits the reaction [Nicotine results in increased expression of CHRNA7 mRNA]	decreases^reaction|increases^expression	18450646
1,2-bis(2-aminophenoxy)ethane N,N,N',N'-tetraacetic acid acetoxymethyl ester	C070379	139890-68-9	COL6A3	1293	Homo sapiens	9606	[1,2-bis(2-aminophenoxy)ethane N,N,N',N'-tetraacetic acid acetoxymethyl ester co-treated with Egtazic Acid] inhibits the reaction [COL6A3 gene mutant form results in increased susceptibility to Rotenone]	affects^cotreatment|decreases^reaction|increases^response to substance	18435905
1,2-bis(2-aminophenoxy)ethane N,N,N',N'-tetraacetic acid acetoxymethyl ester	C070379	139890-68-9	CSF2	1437	Homo sapiens	9606	1,2-bis(2-aminophenoxy)ethane N,N,N',N'-tetraacetic acid acetoxymethyl ester inhibits the reaction [kaempferol results in increased secretion of CSF2 protein]	decreases^reaction|increases^secretion	18346843
1,2-bis(2-aminophenoxy)ethane N,N,N',N'-tetraacetic acid acetoxymethyl ester	C070379	139890-68-9	CYP1A1	1543	Homo sapiens	9606	1,2-bis(2-aminophenoxy)ethane N,N,N',N'-tetraacetic acid acetoxymethyl ester inhibits the reaction [Benzo(a)pyrene results in increased expression of CYP1A1 mRNA]	decreases^reaction|increases^expression	16679317
1,2-bis(2-aminophenoxy)ethane N,N,N',N'-tetraacetic acid acetoxymethyl ester	C070379	139890-68-9	EGF	1950	Homo sapiens	9606	1,2-bis(2-aminophenoxy)ethane N,N,N',N'-tetraacetic acid acetoxymethyl ester inhibits the reaction [EGF protein affects the localization of PRKCB protein]	affects^localization|decreases^reaction	17991733
1,2-bis(2-aminophenoxy)ethane N,N,N',N'-tetraacetic acid acetoxymethyl ester	C070379	139890-68-9	IL8	3576	Homo sapiens	9606	1,2-bis(2-aminophenoxy)ethane N,N,N',N'-tetraacetic acid acetoxymethyl ester inhibits the reaction [Neurotensin results in increased expression of IL8 mRNA]	decreases^reaction|increases^expression	17000667
1,2-bis(2-aminophenoxy)ethane N,N,N',N'-tetraacetic acid acetoxymethyl ester	C070379	139890-68-9	ITGB2	3689	Homo sapiens	9606	1,2-bis(2-aminophenoxy)ethane N,N,N',N'-tetraacetic acid acetoxymethyl ester inhibits the reaction [ITGB2 protein results in increased activity of RAP1A protein]	decreases^reaction|increases^activity	16963453
1,2-bis(2-aminophenoxy)ethane N,N,N',N'-tetraacetic acid acetoxymethyl ester	C070379	139890-68-9	JNK	100533320	Homo sapiens	9606	1,2-bis(2-aminophenoxy)ethane N,N,N',N'-tetraacetic acid acetoxymethyl ester promotes the reaction [Desipramine results in increased phosphorylation of JNK protein]	increases^phosphorylation|increases^reaction	18606486
1,2-bis(2-aminophenoxy)ethane N,N,N',N'-tetraacetic acid acetoxymethyl ester	C070379	139890-68-9	MAPK1	5594	Homo sapiens	9606	[1,2-bis(2-aminophenoxy)ethane N,N,N',N'-tetraacetic acid acetoxymethyl ester co-treated with Genistein] inhibits the reaction [Thapsigargin promotes the reaction [Homocysteine results in increased phosphorylation of MAPK1 protein]]	affects^cotreatment|decreases^reaction|increases^phosphorylation|increases^reaction	16251475
1,2-bis(2-aminophenoxy)ethane N,N,N',N'-tetraacetic acid acetoxymethyl ester	C070379	139890-68-9	MAPK3	5595	Homo sapiens	9606	[1,2-bis(2-aminophenoxy)ethane N,N,N',N'-tetraacetic acid acetoxymethyl ester co-treated with Genistein] inhibits the reaction [Thapsigargin promotes the reaction [Homocysteine results in increased phosphorylation of MAPK3 protein]]	affects^cotreatment|decreases^reaction|increases^phosphorylation|increases^reaction	16251475
1,2-bis(2-aminophenoxy)ethane N,N,N',N'-tetraacetic acid acetoxymethyl ester	C070379	139890-68-9	MAPK8	5599	Homo sapiens	9606	1,2-bis(2-aminophenoxy)ethane N,N,N',N'-tetraacetic acid acetoxymethyl ester inhibits the reaction [Pilocarpine results in increased activity of MAPK8 protein]	decreases^reaction|increases^activity	19927300
1,2-bis(2-aminophenoxy)ethane N,N,N',N'-tetraacetic acid acetoxymethyl ester	C070379	139890-68-9	NR3C1	2908	Homo sapiens	9606	1,2-bis(2-aminophenoxy)ethane N,N,N',N'-tetraacetic acid acetoxymethyl ester inhibits the reaction [Dexamethasone results in increased phosphorylation of NR3C1 protein]	decreases^reaction|increases^phosphorylation	18483179
1,2-bis(2-aminophenoxy)ethane N,N,N',N'-tetraacetic acid acetoxymethyl ester	C070379	139890-68-9	P2RY1	5028	Homo sapiens	9606	1,2-bis(2-aminophenoxy)ethane N,N,N',N'-tetraacetic acid acetoxymethyl ester inhibits the reaction [P2RY1 protein results in increased phosphorylation of and results in increased activity of AKT1 protein]	decreases^reaction|increases^activity|increases^phosphorylation	16236484
1,2-bis(2-aminophenoxy)ethane N,N,N',N'-tetraacetic acid acetoxymethyl ester	C070379	139890-68-9	PLA2G1B	5319	Homo sapiens	9606	1,2-bis(2-aminophenoxy)ethane N,N,N',N'-tetraacetic acid acetoxymethyl ester inhibits the reaction [PLA2G1B protein results in increased abundance of Calcium]	decreases^reaction|increases^abundance	15528384
1,2-bis(2-aminophenoxy)ethane N,N,N',N'-tetraacetic acid acetoxymethyl ester	C070379	139890-68-9	PRKCB	5579	Homo sapiens	9606	1,2-bis(2-aminophenoxy)ethane N,N,N',N'-tetraacetic acid acetoxymethyl ester inhibits the reaction [EGF protein affects the localization of PRKCB protein]	affects^localization|decreases^reaction	17991733
1,2-bis(2-aminophenoxy)ethane N,N,N',N'-tetraacetic acid acetoxymethyl ester	C070379	139890-68-9	RAP1A	5906	Homo sapiens	9606	1,2-bis(2-aminophenoxy)ethane N,N,N',N'-tetraacetic acid acetoxymethyl ester inhibits the reaction [ITGB2 protein results in increased activity of RAP1A protein]	decreases^reaction|increases^activity	16963453
1-(2-cyano-3,12-dioxooleana-1,9-dien-28-oyl) imidazole	C472829		AR	367	Homo sapiens	9606	1-(2-cyano-3,12-dioxooleana-1,9-dien-28-oyl) imidazole results in decreased expression of AR protein	decreases^expression	19805354
1-(2-cyano-3,12-dioxooleana-1,9-dien-28-oyl) imidazole	C472829		CASP3	836	Homo sapiens	9606	[bortezomib co-treated with 1-(2-cyano-3,12-dioxooleana-1,9-dien-28-oyl) imidazole] results in increased activity of CASP3 protein	affects^cotreatment|increases^activity	15070698
1-(2-cyano-3,12-dioxooleana-1,9-dien-28-oyl) imidazole	C472829		CASP8	841	Homo sapiens	9606	[bortezomib co-treated with 1-(2-cyano-3,12-dioxooleana-1,9-dien-28-oyl) imidazole] results in increased activity of CASP8 protein	affects^cotreatment|increases^activity	15070698
1-(2-cyano-3,12-dioxooleana-1,9-dien-28-oyl) imidazole	C472829		CASP9	842	Homo sapiens	9606	[bortezomib co-treated with 1-(2-cyano-3,12-dioxooleana-1,9-dien-28-oyl) imidazole] results in increased activity of CASP9 protein	affects^cotreatment|increases^activity	15070698
1-(2-cyano-3,12-dioxooleana-1,9-dien-28-oyl) imidazole	C472829		DIABLO	56616	Homo sapiens	9606	[bortezomib co-treated with 1-(2-cyano-3,12-dioxooleana-1,9-dien-28-oyl) imidazole] results in decreased localization of DIABLO protein	affects^cotreatment|decreases^localization	15070698
1-(2-cyano-3,12-dioxooleana-1,9-dien-28-oyl) imidazole	C472829		IL6	3569	Homo sapiens	9606	1-(2-cyano-3,12-dioxooleana-1,9-dien-28-oyl) imidazole results in decreased secretion of IL6 protein	decreases^secretion	15070698
1,2-diaminobenzene	C034193	95-54-5	CAT	847	Homo sapiens	9606	CAT protein inhibits the reaction [Tetradecanoylphorbol Acetate results in increased oxidation of 1,2-diaminobenzene]	decreases^reaction|increases^oxidation	3030588
1,2-diaminobenzene	C034193	95-54-5	MPO	4353	Homo sapiens	9606	MPO protein results in increased oxidation of 1,2-diaminobenzene	increases^oxidation	3030588
1,2-dibromo-3-chloropropane	C007318	1996-12-08	GSTA1	2938	Homo sapiens	9606	GSTA1 protein affects the metabolism of 1,2-dibromo-3-chloropropane	affects^metabolic processing	8242859
1,2-dibromo-3-chloropropane	C007318	1996-12-08	GSTP1	2950	Homo sapiens	9606	GSTP1 protein affects the metabolism of 1,2-dibromo-3-chloropropane	affects^metabolic processing	8242859
1,2-dielaidoylphosphatidylethanolamine	C020888	76391-83-8	CEACAM7	1087	Homo sapiens	9606	1,2-dielaidoylphosphatidylethanolamine results in decreased expression of CEACAM7 mRNA	decreases^expression	14668052
1,2-dielaidoylphosphatidylethanolamine	C020888	76391-83-8	CPA3	1359	Homo sapiens	9606	1,2-dielaidoylphosphatidylethanolamine results in decreased expression of CPA3 mRNA	decreases^expression	14668052
1,2-dielaidoylphosphatidylethanolamine	C020888	76391-83-8	CXCL9	4283	Homo sapiens	9606	1,2-dielaidoylphosphatidylethanolamine results in decreased expression of CXCL9 mRNA	decreases^expression	14668052
1,2-dielaidoylphosphatidylethanolamine	C020888	76391-83-8	DUSP1	1843	Homo sapiens	9606	1,2-dielaidoylphosphatidylethanolamine results in decreased expression of DUSP1 mRNA	decreases^expression	14668052
1,2-dielaidoylphosphatidylethanolamine	C020888	76391-83-8	EDNRB	1910	Homo sapiens	9606	1,2-dielaidoylphosphatidylethanolamine results in decreased expression of EDNRB mRNA alternative form	decreases^expression	14668052
1,2-dielaidoylphosphatidylethanolamine	C020888	76391-83-8	GLRX	2745	Homo sapiens	9606	1,2-dielaidoylphosphatidylethanolamine results in decreased expression of GLRX mRNA	decreases^expression	14668052
1,2-dielaidoylphosphatidylethanolamine	C020888	76391-83-8	RPA1	6117	Homo sapiens	9606	1,2-dielaidoylphosphatidylethanolamine results in increased expression of RPA1 mRNA	increases^expression	14668052
1,2-dielaidoylphosphatidylethanolamine	C020888	76391-83-8	RPL6	6128	Homo sapiens	9606	1,2-dielaidoylphosphatidylethanolamine results in decreased expression of RPL6 mRNA	decreases^expression	14668052
1,2-dihydro-1,2-dihydroxy-5-methylchrysene	C017229	67411-81-8	UGT2A1	10941	Homo sapiens	9606	UGT2A1 protein results in increased glucuronidation of 1,2-dihydro-1,2-dihydroxy-5-methylchrysene	increases^glucuronidation	21164388
1',2'-dihydrorotenone	C044985	6659-45-6	ND1	4535	Homo sapiens	9606	1',2'-dihydrorotenone binds to ND1 protein	affects^binding	9452319
1,2-Dihydroxybenzene-3,5-Disulfonic Acid Disodium Salt	D014013	149-45-1	AGT	183	Homo sapiens	9606	1,2-Dihydroxybenzene-3,5-Disulfonic Acid Disodium Salt inhibits the reaction [Glucose promotes the reaction [AGT protein results in increased phosphorylation of JAK2 protein]]	decreases^reaction|increases^phosphorylation|increases^reaction	15677497
1,2-Dihydroxybenzene-3,5-Disulfonic Acid Disodium Salt	D014013	149-45-1	ATF4	468	Homo sapiens	9606	1,2-Dihydroxybenzene-3,5-Disulfonic Acid Disodium Salt inhibits the reaction [bortezomib results in increased expression of ATF4 protein]	decreases^reaction|increases^expression	15509775
1,2-Dihydroxybenzene-3,5-Disulfonic Acid Disodium Salt	D014013	149-45-1	BCL2	596	Homo sapiens	9606	1,2-Dihydroxybenzene-3,5-Disulfonic Acid Disodium Salt inhibits the reaction [4(2'-aminoethyl)amino-1,8-dimethylimidazo(1,2-a)quinoxaline results in decreased expression of BCL2 protein]	decreases^expression|decreases^reaction	17395010
1,2-Dihydroxybenzene-3,5-Disulfonic Acid Disodium Salt	D014013	149-45-1	BECN1	8678	Homo sapiens	9606	1,2-Dihydroxybenzene-3,5-Disulfonic Acid Disodium Salt inhibits the reaction [Rotenone results in increased expression of BECN1 protein]	decreases^reaction|increases^expression	18032788
1,2-Dihydroxybenzene-3,5-Disulfonic Acid Disodium Salt	D014013	149-45-1	CASP3	836	Homo sapiens	9606	1,2-Dihydroxybenzene-3,5-Disulfonic Acid Disodium Salt affects the reaction [bortezomib results in increased cleavage of CASP3 protein]	affects^reaction|increases^cleavage	15509775
1,2-Dihydroxybenzene-3,5-Disulfonic Acid Disodium Salt	D014013	149-45-1	CASP9	842	Homo sapiens	9606	1,2-Dihydroxybenzene-3,5-Disulfonic Acid Disodium Salt affects the reaction [bortezomib results in increased cleavage of CASP9 protein]	affects^reaction|increases^cleavage	15509775
1,2-Dihydroxybenzene-3,5-Disulfonic Acid Disodium Salt	D014013	149-45-1	CTSB	1508	Homo sapiens	9606	1,2-Dihydroxybenzene-3,5-Disulfonic Acid Disodium Salt inhibits the reaction [bortezomib results in increased localization of CTSB protein]	decreases^reaction|increases^localization	16446371
1,2-Dihydroxybenzene-3,5-Disulfonic Acid Disodium Salt	D014013	149-45-1	CXCL1	2919	Homo sapiens	9606	1,2-Dihydroxybenzene-3,5-Disulfonic Acid Disodium Salt results in increased expression of CXCL1 protein	increases^expression	17395010
1,2-Dihydroxybenzene-3,5-Disulfonic Acid Disodium Salt	D014013	149-45-1	IL1B	3553	Homo sapiens	9606	1,2-Dihydroxybenzene-3,5-Disulfonic Acid Disodium Salt inhibits the reaction [IL1B protein results in increased expression of MMP1 protein]	decreases^reaction|increases^expression	16987005
1,2-Dihydroxybenzene-3,5-Disulfonic Acid Disodium Salt	D014013	149-45-1	IL24	11009	Homo sapiens	9606	1,2-Dihydroxybenzene-3,5-Disulfonic Acid Disodium Salt results in decreased activity of IL24 protein	decreases^activity	14678967
1,2-Dihydroxybenzene-3,5-Disulfonic Acid Disodium Salt	D014013	149-45-1	JAK2	3717	Homo sapiens	9606	1,2-Dihydroxybenzene-3,5-Disulfonic Acid Disodium Salt inhibits the reaction [Glucose promotes the reaction [AGT protein results in increased phosphorylation of JAK2 protein]]	decreases^reaction|increases^phosphorylation|increases^reaction	15677497
1,2-Dihydroxybenzene-3,5-Disulfonic Acid Disodium Salt	D014013	149-45-1	MMP1	4312	Homo sapiens	9606	1,2-Dihydroxybenzene-3,5-Disulfonic Acid Disodium Salt inhibits the reaction [IL1B protein results in increased expression of MMP1 protein]	decreases^reaction|increases^expression	16987005
1,2-Dihydroxybenzene-3,5-Disulfonic Acid Disodium Salt	D014013	149-45-1	MMP9	4318	Homo sapiens	9606	1,2-Dihydroxybenzene-3,5-Disulfonic Acid Disodium Salt inhibits the reaction [Acrolein results in increased expression of MMP9 protein]	decreases^reaction|increases^expression	19371603
1,2-Dihydroxybenzene-3,5-Disulfonic Acid Disodium Salt	D014013	149-45-1	NFKB1	4790	Homo sapiens	9606	1,2-Dihydroxybenzene-3,5-Disulfonic Acid Disodium Salt results in increased activity of NFKB1 protein	increases^activity	17395010
1,2-Dihydroxybenzene-3,5-Disulfonic Acid Disodium Salt	D014013	149-45-1	RELA	5970	Homo sapiens	9606	1,2-Dihydroxybenzene-3,5-Disulfonic Acid Disodium Salt results in increased activity of RELA protein	increases^activity	17395010
1,2-dilauroylphosphatidylcholine	C015153	18285-71-7	CYP3A4	1576	Homo sapiens	9606	[1,2-dilauroylphosphatidylcholine co-treated with 1,2-oleoylphosphatidylcholine co-treated with Phosphatidylserines co-treated with Sodium Cholate] results in increased activity of CYP3A4 protein	affects^cotreatment|increases^activity	1627548
1,2-dilauroylphosphatidylcholine	C015153	18285-71-7	PON1	5444	Homo sapiens	9606	1,2-dilauroylphosphatidylcholine results in increased activity of PON1 protein	increases^activity	12963475
1,2-dimethylnaphthalene	C117619	573-98-8	CYP1A2	1544	Homo sapiens	9606	1,2-dimethylnaphthalene results in decreased activity of CYP1A2 protein	decreases^activity	15916432
1,2-dioleoyl-sn-glycero-3-phosphoglycerol	C051388	66322-31-4	PON1	5444	Homo sapiens	9606	1,2-dioleoyl-sn-glycero-3-phosphoglycerol inhibits the reaction [[Ascorbic Acid co-treated with Copper Sulfate] results in decreased activity of PON1 protein]	affects^cotreatment|decreases^activity|decreases^reaction	12871208
1,2-dithiol-3-thione	C049325	534-25-8	IVL	3713	Homo sapiens	9606	1,2-dithiol-3-thione results in decreased expression of IVL protein	decreases^expression	10769631
1,2-epoxy-3-(p-nitrophenoxy)propane	C007606	5255-75-4	GSTT1	2952	Homo sapiens	9606	GSTT1 protein affects the metabolism of 1,2-epoxy-3-(p-nitrophenoxy)propane	affects^metabolic processing	15882759|15683365
12-HPETE	C021201	67675-13-2	GPX1	2876	Homo sapiens	9606	GPX1 protein results in increased susceptibility to 12-HPETE	increases^response to substance	11115402
12-HPETE	C021201	67675-13-2	GPX4	2879	Homo sapiens	9606	GPX4 protein results in increased chemical synthesis of 12-HPETE	increases^chemical synthesis	11115402
12-hydroxydodecanoic acid	C031263	505-95-3	ADH5	128	Homo sapiens	9606	12-hydroxydodecanoic acid binds to ADH5 protein	affects^binding	12196016|12604204
12-ketoendrin	C041597	28548-08-5	GABRR1	2569	Homo sapiens	9606	12-ketoendrin binds to GABRR1 protein	affects^binding	11879973
1-(2-methyl-4-methoxyphenyl)-4-((2-hydroxyethyl)amino)-6-trifluoromethoxy-2,3-dihydropyrrolo(3,2-c)quinoline	C439392		CYP1A2	1544	Homo sapiens	9606	1-(2-methyl-4-methoxyphenyl)-4-((2-hydroxyethyl)amino)-6-trifluoromethoxy-2,3-dihydropyrrolo(3,2-c)quinoline results in decreased activity of CYP1A2 protein	decreases^activity	15585365
1-(2-methyl-4-methoxyphenyl)-4-((2-hydroxyethyl)amino)-6-trifluoromethoxy-2,3-dihydropyrrolo(3,2-c)quinoline	C439392		CYP2C9	1559	Homo sapiens	9606	CYP2C9 protein results in decreased methylation of 1-(2-methyl-4-methoxyphenyl)-4-((2-hydroxyethyl)amino)-6-trifluoromethoxy-2,3-dihydropyrrolo(3,2-c)quinoline	decreases^methylation	15585365
1-(2-methyl-4-methoxyphenyl)-4-((2-hydroxyethyl)amino)-6-trifluoromethoxy-2,3-dihydropyrrolo(3,2-c)quinoline	C439392		CYP2D6	1565	Homo sapiens	9606	CYP2D6 protein results in decreased methylation of 1-(2-methyl-4-methoxyphenyl)-4-((2-hydroxyethyl)amino)-6-trifluoromethoxy-2,3-dihydropyrrolo(3,2-c)quinoline	decreases^methylation	15585365
1-(2-methyl-4-methoxyphenyl)-4-((2-hydroxyethyl)amino)-6-trifluoromethoxy-2,3-dihydropyrrolo(3,2-c)quinoline	C439392		CYP3A4	1576	Homo sapiens	9606	CYP3A4 protein results in increased oxidation of 1-(2-methyl-4-methoxyphenyl)-4-((2-hydroxyethyl)amino)-6-trifluoromethoxy-2,3-dihydropyrrolo(3,2-c)quinoline	increases^oxidation	15585365
1-(2-methylbenzoxazol-6-yl)-3-(1,5)naphthyridin-4-yl urea	C420062		HCRTR1	3061	Homo sapiens	9606	1-(2-methylbenzoxazol-6-yl)-3-(1,5)naphthyridin-4-yl urea binds to and results in decreased activity of HCRTR1 protein	affects^binding|decreases^activity	11459658
1,2-naphthoquinone	C040756	524-42-5	AKR1A1	10327	Homo sapiens	9606	AKR1A1 protein results in increased reduction of 1,2-naphthoquinone	increases^reduction	10510318
1,2-naphthoquinone	C040756	524-42-5	AKR1B1	231	Homo sapiens	9606	AKR1B1 protein results in increased reduction of 1,2-naphthoquinone	increases^reduction	10510318
1,2-naphthoquinone	C040756	524-42-5	AKR7A2	8574	Homo sapiens	9606	AKR7A2 protein results in increased reduction of 1,2-naphthoquinone	increases^reduction	10510318
1,2-oleoylphosphatidylcholine	C017251	10015-85-7	CYP3A4	1576	Homo sapiens	9606	[1,2-dilauroylphosphatidylcholine co-treated with 1,2-oleoylphosphatidylcholine co-treated with Phosphatidylserines co-treated with Sodium Cholate] results in increased activity of CYP3A4 protein	affects^cotreatment|increases^activity	1627548
1,2-oleoylphosphatidylcholine	C017251	10015-85-7	LCAT	3931	Homo sapiens	9606	LCAT protein binds to 1,2-oleoylphosphatidylcholine	affects^binding	16780378
1,2-oleoylphosphatidylcholine	C017251	10015-85-7	PON1	5444	Homo sapiens	9606	1,2-oleoylphosphatidylcholine inhibits the reaction [[Ascorbic Acid co-treated with Copper Sulfate] results in decreased activity of PON1 protein]	affects^cotreatment|decreases^activity|decreases^reaction	12871208
13,14-dihydro-15-ketoprostaglandin D2	C034832	59894-07-4	PTGDR2	11251	Homo sapiens	9606	13,14-dihydro-15-ketoprostaglandin D2 binds to and results in increased activity of PTGDR2 protein	affects^binding|increases^activity	16256979
1,3,5-tris(4-hydroxyphenyl)-4-propyl-1H-pyrazole	C419153		LAMP3	27074	Homo sapiens	9606	1,3,5-tris(4-hydroxyphenyl)-4-propyl-1H-pyrazole results in decreased expression of LAMP3 mRNA	decreases^expression	20678512
1-((3-benzyl-3-methyl-2,3-dihydro-1-benzofuran-6-yl)carbonyl)piperidine	C534147		CNR2	1269	Homo sapiens	9606	1-((3-benzyl-3-methyl-2,3-dihydro-1-benzofuran-6-yl)carbonyl)piperidine binds to and results in increased activity of CNR2 protein	affects^binding|increases^activity	18846037
1,3-bis(4-hydroxyphenyl)-4-methyl-5-(4-(2-piperidinylethoxy)phenol)-1H-pyrazole	C524478		ESR1	2099	Homo sapiens	9606	1,3-bis(4-hydroxyphenyl)-4-methyl-5-(4-(2-piperidinylethoxy)phenol)-1H-pyrazole inhibits the reaction [exemestane binds to and results in increased activity of ESR1 protein]	affects^binding|decreases^reaction|increases^activity	18677558
1,3-butadiene	C031763	106-99-0	CYP2E1	1571	Homo sapiens	9606	CYP2E1 protein affects the metabolism of 1,3-butadiene	affects^metabolic processing	15470755
1,3-butadiene	C031763	106-99-0	EPHX1	2052	Homo sapiens	9606	EPHX1 5' UTR polymorphism results in increased susceptibility to 1,3-butadiene	increases^response to substance	15716486
1,3-butadiene	C031763	106-99-0	GSTM1	2944	Homo sapiens	9606	GSTM1 gene polymorphism promotes the reaction [EPHX1 gene polymorphism results in increased susceptibility to 1,3-butadiene]	increases^reaction|increases^response to substance	11238181
1,3-butadiene	C031763	106-99-0	GSTT1	2952	Homo sapiens	9606	GSTT1 gene polymorphism promotes the reaction [EPHX1 gene polymorphism results in increased susceptibility to 1,3-butadiene]	increases^reaction|increases^response to substance	11238181
1,3-butadiene	C031763	106-99-0	MPO	4353	Homo sapiens	9606	MPO protein results in increased oxidation of 1,3-butadiene	increases^oxidation	1328183
1-(3-chlorophenyl)piperazine	C015068	6640-24-0	CYP2D6	1565	Homo sapiens	9606	CYP2D6 protein affects the metabolism of 1-(3-chlorophenyl)piperazine	affects^metabolic processing	18238857
1-(3-chlorophenyl)piperazine	C015068	6640-24-0	HTR2A	3356	Homo sapiens	9606	1-(3-chlorophenyl)piperazine binds to and results in increased activity of HTR2A protein	affects^binding|increases^activity	16314884
1-(3-chlorophenyl)piperazine	C015068	6640-24-0	PRL	5617	Homo sapiens	9606	1-(3-chlorophenyl)piperazine results in increased expression of PRL protein	increases^expression	9598218|16418827
13-cis-retinal	C031338	472-86-6	CYP3A4	1576	Homo sapiens	9606	13-cis-retinal promotes the reaction [[RXRA protein binds to NR1I2 protein] which results in increased expression of CYP3A4 mRNA]	affects^binding|increases^expression|increases^reaction	16632523
13-cis-retinal	C031338	472-86-6	NR1I2	8856	Homo sapiens	9606	13-cis-retinal promotes the reaction [[RXRA protein binds to NR1I2 protein] which results in increased expression of CYP3A4 mRNA]	affects^binding|increases^expression|increases^reaction	16632523
13-cis-retinal	C031338	472-86-6	RXRA	6256	Homo sapiens	9606	13-cis-retinal promotes the reaction [[RXRA protein binds to NR1I2 protein] which results in increased expression of CYP3A4 mRNA]	affects^binding|increases^expression|increases^reaction	16632523
1,3-dichloro-1-propene	C023891	542-75-6	ALB	213	Homo sapiens	9606	1,3-dichloro-1-propene results in increased expression of ALB protein	increases^expression	2015207
1,3-dichlorobenzene	C042146	541-73-1	ESR1	2099	Homo sapiens	9606	1,3-dichlorobenzene results in increased activity of ESR1 protein	increases^activity	12558164
1,3-dihydroxy-2-hydroxymethylpropyl-2-ammonium 2-((R)-3-cyclo-hexyl-1-phenylpropyl)-1,3-dioxo-2,3-dihydro-1H-isoindole-5-carboxylate monohydrate	C503118		IGHE	3497	Homo sapiens	9606	1,3-dihydroxy-2-hydroxymethylpropyl-2-ammonium 2-((R)-3-cyclo-hexyl-1-phenylpropyl)-1,3-dioxo-2,3-dihydro-1H-isoindole-5-carboxylate monohydrate results in decreased expression of IGHE protein	decreases^expression	15821026
1,3-dihydroxy-2-hydroxymethylpropyl-2-ammonium 2-((R)-3-cyclo-hexyl-1-phenylpropyl)-1,3-dioxo-2,3-dihydro-1H-isoindole-5-carboxylate monohydrate	C503118		IL5	3567	Homo sapiens	9606	1,3-dihydroxy-2-hydroxymethylpropyl-2-ammonium 2-((R)-3-cyclo-hexyl-1-phenylpropyl)-1,3-dioxo-2,3-dihydro-1H-isoindole-5-carboxylate monohydrate results in decreased expression of IL5 protein	decreases^expression	15821026
1,3-dihydroxy-4,4,5,5-tetramethyl-2-(4-carboxyphenyl)tetrahydroimidazole	C079393	145757-47-7	CAV1	857	Homo sapiens	9606	1,3-dihydroxy-4,4,5,5-tetramethyl-2-(4-carboxyphenyl)tetrahydroimidazole results in decreased expression of CAV1 protein	decreases^expression	19706615
1,3-dimethylthiourea	C038983	61805-96-7	ALB	213	Homo sapiens	9606	1,3-dimethylthiourea inhibits the reaction [ALB protein results in increased abundance of Hydrogen Peroxide]	decreases^reaction|increases^abundance	11961005
1,3-dimethylthiourea	C038983	61805-96-7	CCL2	6347	Homo sapiens	9606	1,3-dimethylthiourea inhibits the reaction [ALB protein results in increased expression of CCL2 mRNA]	decreases^reaction|increases^expression	11961005
1,3-dimethylthiourea	C038983	61805-96-7	EDN1	1906	Homo sapiens	9606	1,3-dimethylthiourea results in decreased expression of EDN1 mRNA	decreases^expression	11603923
1,3-dimethylthiourea	C038983	61805-96-7	ELANE	1991	Homo sapiens	9606	1,3-dimethylthiourea inhibits the reaction [ELANE protein results in increased expression of MUC5AC mRNA]	decreases^reaction|increases^expression	17456367|10843967|11919081
1,3-dimethylthiourea	C038983	61805-96-7	ICAM1	3383	Homo sapiens	9606	1,3-dimethylthiourea inhibits the reaction [TNF protein results in increased expression of ICAM1 mRNA]	decreases^reaction|increases^expression	14572618
1,3-dimethylthiourea	C038983	61805-96-7	IL1B	3553	Homo sapiens	9606	1,3-dimethylthiourea inhibits the reaction [Lipopolysaccharides results in increased expression of IL1B mRNA]	decreases^reaction|increases^expression	9851740
1,3-dimethylthiourea	C038983	61805-96-7	IL6	3569	Homo sapiens	9606	1,3-dimethylthiourea inhibits the reaction [Coal Ash results in increased expression of IL6 mRNA]	decreases^reaction|increases^expression	9344885
1,3-dimethylthiourea	C038983	61805-96-7	IL8	3576	Homo sapiens	9606	1,3-dimethylthiourea inhibits the reaction [Coal Ash results in increased expression of IL8 mRNA]	decreases^reaction|increases^expression	9344885
1,3-dimethylthiourea	C038983	61805-96-7	MSR1	4481	Homo sapiens	9606	1,3-dimethylthiourea inhibits the reaction [Tetradecanoylphorbol Acetate results in increased expression of MSR1 mRNA]	decreases^reaction|increases^expression	9614211
1,3-dimethylthiourea	C038983	61805-96-7	MUC5AC	4586	Homo sapiens	9606	1,3-dimethylthiourea inhibits the reaction [ELANE protein results in increased expression of MUC5AC mRNA]	decreases^reaction|increases^expression	17456367|10843967|11919081
1,3-dimethylthiourea	C038983	61805-96-7	NFKB1	4790	Homo sapiens	9606	1,3-dimethylthiourea inhibits the reaction [Hydrogen Peroxide results in increased activity of [RELA protein binds to NFKB1 protein]]	affects^binding|decreases^reaction|increases^activity	11961005
1,3-dimethylthiourea	C038983	61805-96-7	RELA	5970	Homo sapiens	9606	1,3-dimethylthiourea inhibits the reaction [Hydrogen Peroxide results in increased activity of [RELA protein binds to NFKB1 protein]]	affects^binding|decreases^reaction|increases^activity	11961005
1,3-dimethylthiourea	C038983	61805-96-7	TGF	100136774	Homo sapiens	9606	1,3-dimethylthiourea inhibits the reaction [ELANE protein results in increased expression of TGF protein]	decreases^reaction|increases^expression	17456367
1,3-dimethylthiourea	C038983	61805-96-7	TNF	7124	Homo sapiens	9606	1,3-dimethylthiourea inhibits the reaction [Lipopolysaccharides results in increased expression of TNF mRNA]	decreases^reaction|increases^expression	9851740
1,3-dimethylthiourea	C038983	61805-96-7	TNFRSF1A	7132	Homo sapiens	9606	1,3-dimethylthiourea inhibits the reaction [Hydrogen Peroxide results in increased expression of TNFRSF1A protein]	decreases^reaction|increases^expression	9870925
1, 3-di-(N-carboxybenzoyl-leucyl-leucyl)amino acetone	C415363		HM13	81502	Homo sapiens	9606	1, 3-di-(N-carboxybenzoyl-leucyl-leucyl)amino acetone binds to HM13 protein	affects^binding	17932033
1,3-dinitropyrene	C037413	75321-20-9	CYP1A1	1543	Homo sapiens	9606	1,3-dinitropyrene results in increased expression of CYP1A1 mRNA	increases^expression	12107646
1,3-ditolylguanidine	C050232	97-39-2	KCNH2	3757	Homo sapiens	9606	1,3-ditolylguanidine results in decreased activity of KCNH2 protein	decreases^activity	17460149
13-hydroxy-9,11-octadecadienoic acid	C024348	5204-88-6	ALOX15	246	Homo sapiens	9606	[caffeic acid results in decreased activity of ALOX15 protein] which results in decreased chemical synthesis of 13-hydroxy-9,11-octadecadienoic acid	decreases^activity|decreases^chemical synthesis	11406566
13-oxo-9,11-octadecadienoic acid	C064441	31385-09-8	GSTA1	2938	Homo sapiens	9606	GSTA1 protein affects the metabolism of 13-oxo-9,11-octadecadienoic acid	affects^metabolic processing	12031293
13-oxo-9,11-octadecadienoic acid	C064441	31385-09-8	GSTA4	2941	Homo sapiens	9606	GSTA4 protein affects the metabolism of 13-oxo-9,11-octadecadienoic acid	affects^metabolic processing	12031293
14,15-epoxy-5,8,11-eicosatrienoic acid	C046782	81276-03-1	AKT1	207	Homo sapiens	9606	14,15-epoxy-5,8,11-eicosatrienoic acid results in increased phosphorylation of AKT1 protein	increases^phosphorylation	16286479
14,15-epoxy-5,8,11-eicosatrienoic acid	C046782	81276-03-1	FGF2	2247	Homo sapiens	9606	14,15-epoxy-5,8,11-eicosatrienoic acid results in increased expression of FGF2 protein	increases^expression	16286479
14,15-epoxy-5,8,11-eicosatrienoic acid	C046782	81276-03-1	RPS6KB1	6198	Homo sapiens	9606	14,15-epoxy-5,8,11-eicosatrienoic acid results in increased phosphorylation of RPS6KB1 protein	increases^phosphorylation	16286479
1-(4-(4-(4-((4-(2,4-difluorophenyl)-4-(1H-1,2,4-triazol-1-ylmethyl)-1,3-dioxolan-2-yl)methoxy)phenyl)piperazin-1-yl)phenyl)-3-(1-methylethyl)-2-imidazolidinone	C482452		CYP24A1	1591	Homo sapiens	9606	1-(4-(4-(4-((4-(2,4-difluorophenyl)-4-(1H-1,2,4-triazol-1-ylmethyl)-1,3-dioxolan-2-yl)methoxy)phenyl)piperazin-1-yl)phenyl)-3-(1-methylethyl)-2-imidazolidinone results in decreased activity of CYP24A1 protein	decreases^activity	15328084
1-(4-(4-(4-((4-(2,4-difluorophenyl)-4-(1H-1,2,4-triazol-1-ylmethyl)-1,3-dioxolan-2-yl)methoxy)phenyl)piperazin-1-yl)phenyl)-3-(1-methylethyl)-2-imidazolidinone	C482452		CYP3A4	1576	Homo sapiens	9606	1-(4-(4-(4-((4-(2,4-difluorophenyl)-4-(1H-1,2,4-triazol-1-ylmethyl)-1,3-dioxolan-2-yl)methoxy)phenyl)piperazin-1-yl)phenyl)-3-(1-methylethyl)-2-imidazolidinone results in decreased activity of CYP3A4 protein	decreases^activity	15328084
1-(4-(6-bromobenzo(1,3)dioxol-5-yl)-3a,4,5,9b-tetrahydro-3H-cyclopenta(c)quinolin-8-yl)ethanone	C517943		ESRRA	2101	Homo sapiens	9606	1-(4-(6-bromobenzo(1,3)dioxol-5-yl)-3a,4,5,9b-tetrahydro-3H-cyclopenta(c)quinolin-8-yl)ethanone results in increased expression of ESRRA mRNA	increases^expression	20211987
1-(4-(6-bromobenzo(1,3)dioxol-5-yl)-3a,4,5,9b-tetrahydro-3H-cyclopenta(c)quinolin-8-yl)ethanone	C517943		GPER	2852	Homo sapiens	9606	GPER protein promotes the reaction [1-(4-(6-bromobenzo(1,3)dioxol-5-yl)-3a,4,5,9b-tetrahydro-3H-cyclopenta(c)quinolin-8-yl)ethanone results in increased expression of ESRRA mRNA]	increases^expression|increases^reaction	20211987
1-(4-(benzothiazol-2-yloxy)benzyl)piperidine-4-carboxylic acid	C521339		LTA4H	4048	Homo sapiens	9606	1-(4-(benzothiazol-2-yloxy)benzyl)piperidine-4-carboxylic acid inhibits the reaction [LTA4H protein results in increased chemical synthesis of Leukotriene B4]	decreases^reaction|increases^chemical synthesis	17371808
1,4-bis(2-(3,5-dichloropyridyloxy))benzene	C028474	76150-91-9	CYP1A2	1544	Homo sapiens	9606	1,4-bis(2-(3,5-dichloropyridyloxy))benzene results in increased expression of CYP1A2 mRNA	increases^expression	15764585
1,4-bis(2-(3,5-dichloropyridyloxy))benzene	C028474	76150-91-9	CYP2B10	13088	Homo sapiens	9606	1,4-bis(2-(3,5-dichloropyridyloxy))benzene results in increased expression of CYP2B10 mRNA	increases^expression	15764585
1,4-bis(2-(3,5-dichloropyridyloxy))benzene	C028474	76150-91-9	CYP2B6	1555	Homo sapiens	9606	1,4-bis(2-(3,5-dichloropyridyloxy))benzene promotes the reaction [NCOA6 protein binds to CYP2B6 gene]	affects^binding|increases^reaction	15764585
1,4-bis(2-(3,5-dichloropyridyloxy))benzene	C028474	76150-91-9	CYP3A4	1576	Homo sapiens	9606	1,4-bis(2-(3,5-dichloropyridyloxy))benzene promotes the reaction [NCOA6 protein binds to CYP3A4 gene]	affects^binding|increases^reaction	15764585
1,4-bis(2-(3,5-dichloropyridyloxy))benzene	C028474	76150-91-9	NCOA1	8648	Homo sapiens	9606	[1,4-bis(2-(3,5-dichloropyridyloxy))benzene co-treated with alitretinoin] promotes the reaction [[NR1I3 protein binds to RXRA protein] which binds to NCOA1 protein]	affects^binding|affects^cotreatment|increases^reaction	17223708
1,4-bis(2-(3,5-dichloropyridyloxy))benzene	C028474	76150-91-9	NCOA6	23054	Homo sapiens	9606	1,4-bis(2-(3,5-dichloropyridyloxy))benzene promotes the reaction [NCOA6 protein binds to and results in increased activity of NR1I3 protein]	affects^binding|increases^activity|increases^reaction	15764585
1,4-bis(2-(3,5-dichloropyridyloxy))benzene	C028474	76150-91-9	NR1I3	9970	Homo sapiens	9606	[1,4-bis(2-(3,5-dichloropyridyloxy))benzene co-treated with alitretinoin] promotes the reaction [[NR1I3 protein binds to RXRA protein] which binds to NCOA1 protein]	affects^binding|affects^cotreatment|increases^reaction	17223708
1,4-bis(2-(3,5-dichloropyridyloxy))benzene	C028474	76150-91-9	RXRA	6256	Homo sapiens	9606	[1,4-bis(2-(3,5-dichloropyridyloxy))benzene co-treated with alitretinoin] promotes the reaction [[NR1I3 protein binds to RXRA protein] which binds to NCOA1 protein]	affects^binding|affects^cotreatment|increases^reaction	17223708
1,4-dihydropyridine	C038806	3337-17-5	NR3C1	2908	Homo sapiens	9606	1,4-dihydropyridine analog binds to and results in decreased activity of NR3C1 protein alternative form	affects^binding|decreases^activity	15698539
1,4-dihydroxy-2-naphthoic acid	C024023	31519-22-9	GPR35	2859	Homo sapiens	9606	1,4-dihydroxy-2-naphthoic acid binds to and results in increased activity of GPR35 protein	affects^binding|increases^activity	20826425
1,4-dihydroxyanthraquinone	C034890	81-64-1	ALB	213	Homo sapiens	9606	1,4-dihydroxyanthraquinone binds to ALB protein	affects^binding	16404478
1,4-dihydroxyanthraquinone	C034890	81-64-1	UGT1A1	54658	Homo sapiens	9606	UGT1A1 protein results in increased glucuronidation of 1,4-dihydroxyanthraquinone	increases^glucuronidation	14557274
1,4-dihydroxyanthraquinone	C034890	81-64-1	UGT1A10	54575	Homo sapiens	9606	UGT1A10 protein results in increased glucuronidation of 1,4-dihydroxyanthraquinone	increases^glucuronidation	14557274
1,4-dihydroxyanthraquinone	C034890	81-64-1	UGT1A7	54577	Homo sapiens	9606	UGT1A7 protein results in increased glucuronidation of 1,4-dihydroxyanthraquinone	increases^glucuronidation	14557274
1,4-dihydroxyanthraquinone	C034890	81-64-1	UGT1A8	54576	Homo sapiens	9606	UGT1A8 protein results in increased glucuronidation of 1,4-dihydroxyanthraquinone	increases^glucuronidation	14557274
1,4-dihydroxyanthraquinone	C034890	81-64-1	UGT1A9	54600	Homo sapiens	9606	UGT1A9 protein results in increased glucuronidation of 1,4-dihydroxyanthraquinone	increases^glucuronidation	14557274
1,4-dimethylnaphthalene	C031969	571-58-4	CYP1A2	1544	Homo sapiens	9606	1,4-dimethylnaphthalene results in decreased activity of CYP1A2 protein	decreases^activity	15916432
1-(4-ethynylphenyl)-4-propyl-2,6,7-trioxabicyclo(2.2.2)octane	C091518	108614-26-2	GABRA1	2554	Homo sapiens	9606	1-(4-ethynylphenyl)-4-propyl-2,6,7-trioxabicyclo(2.2.2)octane binds to [GABRA1 protein binds to GABRB2 protein binds to GABRG2 protein]	affects^binding	14637376
1-(4-ethynylphenyl)-4-propyl-2,6,7-trioxabicyclo(2.2.2)octane	C091518	108614-26-2	GABRA2	2555	Homo sapiens	9606	1-(4-ethynylphenyl)-4-propyl-2,6,7-trioxabicyclo(2.2.2)octane binds to [GABRA2 protein binds to GABRB2 protein binds to GABRG2 protein]	affects^binding	14637376
1-(4-ethynylphenyl)-4-propyl-2,6,7-trioxabicyclo(2.2.2)octane	C091518	108614-26-2	GABRB2	2561	Homo sapiens	9606	1-(4-ethynylphenyl)-4-propyl-2,6,7-trioxabicyclo(2.2.2)octane binds to [GABRA1 protein binds to GABRB2 protein binds to GABRG2 protein]	affects^binding	14637376
1-(4-ethynylphenyl)-4-propyl-2,6,7-trioxabicyclo(2.2.2)octane	C091518	108614-26-2	GABRB3	2562	Homo sapiens	9606	1-(4-ethynylphenyl)-4-propyl-2,6,7-trioxabicyclo(2.2.2)octane binds to GABRB3 protein	affects^binding	16537435|11312652|11489356
1-(4-ethynylphenyl)-4-propyl-2,6,7-trioxabicyclo(2.2.2)octane	C091518	108614-26-2	GABRG2	2566	Homo sapiens	9606	1-(4-ethynylphenyl)-4-propyl-2,6,7-trioxabicyclo(2.2.2)octane binds to [GABRA1 protein binds to GABRB2 protein binds to GABRG2 protein]	affects^binding	14637376
1-(4-ethynylphenyl)-4-propyl-2,6,7-trioxabicyclo(2.2.2)octane	C091518	108614-26-2	GABRR1	2569	Homo sapiens	9606	1-(4-ethynylphenyl)-4-propyl-2,6,7-trioxabicyclo(2.2.2)octane binds to GABRR1 protein	affects^binding	11879973
1-(4-hydroxyiminomethylpyridinium)-4-(4-carbamoylpyridinium)butane	C488676		BCHE	590	Homo sapiens	9606	1-(4-hydroxyiminomethylpyridinium)-4-(4-carbamoylpyridinium)butane inhibits the reaction [Trichlorfon results in decreased activity of BCHE protein]	decreases^activity|decreases^reaction	18825528
1-((4-methylsulfonyl)phenyl)-3-trifluoromethyl-5-(4-fluorophenyl)pyrazole	C090859	162054-19-5	ATF3	467	Homo sapiens	9606	1-((4-methylsulfonyl)phenyl)-3-trifluoromethyl-5-(4-fluorophenyl)pyrazole results in increased expression of ATF3 mRNA	increases^expression	14633654
1-((4-methylsulfonyl)phenyl)-3-trifluoromethyl-5-(4-fluorophenyl)pyrazole	C090859	162054-19-5	CYP19A1	1588	Homo sapiens	9606	1-((4-methylsulfonyl)phenyl)-3-trifluoromethyl-5-(4-fluorophenyl)pyrazole results in decreased activity of CYP19A1 protein	decreases^activity	15964185
1-((4-methylsulfonyl)phenyl)-3-trifluoromethyl-5-(4-fluorophenyl)pyrazole	C090859	162054-19-5	PAWR	5074	Homo sapiens	9606	1-((4-methylsulfonyl)phenyl)-3-trifluoromethyl-5-(4-fluorophenyl)pyrazole results in increased expression of PAWR mRNA	increases^expression	10833474
1-((4-methylsulfonyl)phenyl)-3-trifluoromethyl-5-(4-fluorophenyl)pyrazole	C090859	162054-19-5	PTGS2	5743	Homo sapiens	9606	1-((4-methylsulfonyl)phenyl)-3-trifluoromethyl-5-(4-fluorophenyl)pyrazole results in decreased activity of PTGS2 protein	decreases^activity	14633654
1-((4-methylsulfonyl)phenyl)-3-trifluoromethyl-5-(4-fluorophenyl)pyrazole	C090859	162054-19-5	TNFRSF10A	8797	Homo sapiens	9606	1-((4-methylsulfonyl)phenyl)-3-trifluoromethyl-5-(4-fluorophenyl)pyrazole results in increased expression of TNFRSF10A protein	increases^expression	15572759
1-((4-methylsulfonyl)phenyl)-3-trifluoromethyl-5-(4-fluorophenyl)pyrazole	C090859	162054-19-5	TNFRSF10B	8795	Homo sapiens	9606	1-((4-methylsulfonyl)phenyl)-3-trifluoromethyl-5-(4-fluorophenyl)pyrazole results in increased expression of TNFRSF10B protein	increases^expression	15572759
1,4-naphthoquinone	C035342	130-15-4	CASP3	836	Homo sapiens	9606	1,4-naphthoquinone results in decreased activity of CASP3 protein	decreases^activity	16699520
1,4-naphthoquinone	C035342	130-15-4	CYP1A1	1543	Homo sapiens	9606	CYP1A1 protein results in increased abundance of 1,4-naphthoquinone	increases^abundance	16243959
1,4-naphthoquinone	C035342	130-15-4	CYP1A2	1544	Homo sapiens	9606	CYP1A2 protein results in increased abundance of 1,4-naphthoquinone	increases^abundance	16243959
1,4-naphthoquinone	C035342	130-15-4	CYP1B1	1545	Homo sapiens	9606	CYP1B1 protein results in increased abundance of 1,4-naphthoquinone	increases^abundance	16243959
1,4-naphthoquinone	C035342	130-15-4	CYP2B6	1555	Homo sapiens	9606	CYP2B6 protein results in increased abundance of 1,4-naphthoquinone	increases^abundance	16243959
1,4-naphthoquinone	C035342	130-15-4	CYP2C18	1562	Homo sapiens	9606	CYP2C18 protein results in increased abundance of 1,4-naphthoquinone	increases^abundance	16243959
1,4-naphthoquinone	C035342	130-15-4	CYP2C19	1557	Homo sapiens	9606	CYP2C19 protein results in increased abundance of 1,4-naphthoquinone	increases^abundance	16243959
1,4-naphthoquinone	C035342	130-15-4	CYP2C8	1558	Homo sapiens	9606	CYP2C8 protein results in increased abundance of 1,4-naphthoquinone	increases^abundance	16243959
1,4-naphthoquinone	C035342	130-15-4	CYP2C9	1559	Homo sapiens	9606	CYP2C9 protein results in increased abundance of 1,4-naphthoquinone	increases^abundance	16243959
1,4-naphthoquinone	C035342	130-15-4	CYP2D6	1565	Homo sapiens	9606	CYP2D6 protein results in increased abundance of 1,4-naphthoquinone	increases^abundance	16243959
1,4-naphthoquinone	C035342	130-15-4	CYP2E1	1571	Homo sapiens	9606	CYP2E1 protein results in increased abundance of 1,4-naphthoquinone	increases^abundance	16243959
1,4-naphthoquinone	C035342	130-15-4	CYP3A4	1576	Homo sapiens	9606	CYP3A4 protein results in increased abundance of 1,4-naphthoquinone	increases^abundance	16243959
1,4-naphthoquinone	C035342	130-15-4	CYP3A5	1577	Homo sapiens	9606	CYP3A5 protein results in increased abundance of 1,4-naphthoquinone	increases^abundance	16243959
1,4-naphthoquinone	C035342	130-15-4	CYP3A7	1551	Homo sapiens	9606	CYP3A7 protein results in increased abundance of 1,4-naphthoquinone	increases^abundance	16243959
1,4-naphthoquinone	C035342	130-15-4	CYP4A11	1579	Homo sapiens	9606	CYP4A11 protein results in increased abundance of 1,4-naphthoquinone	increases^abundance	16243959
1-(4-(octahydropyrido(1,2-a)pyrazin-2-yl)phenyl)-2-phenyl-1,2,3,4-tetrahydroisoquinolin-6-ol	C496950		ESR1	2099	Homo sapiens	9606	1-(4-(octahydropyrido(1,2-a)pyrazin-2-yl)phenyl)-2-phenyl-1,2,3,4-tetrahydroisoquinolin-6-ol binds to and results in decreased activity of ESR1 protein	affects^binding|decreases^activity	15658851
1,4-phenylenebis(methylene)selenocyanate	C074153	85539-83-9	AKT1	207	Homo sapiens	9606	1,4-phenylenebis(methylene)selenocyanate results in decreased expression of AKT1 protein	decreases^expression	16399772
1,4-phenylenebis(methylene)selenocyanate	C074153	85539-83-9	AR	367	Homo sapiens	9606	AR protein promotes the reaction [1,4-phenylenebis(methylene)selenocyanate results in increased expression of TP53 mRNA]	increases^expression|increases^reaction	17205524
1,4-phenylenebis(methylene)selenocyanate	C074153	85539-83-9	CASP3	836	Homo sapiens	9606	1,4-phenylenebis(methylene)selenocyanate results in increased expression of CASP3 mRNA	increases^expression	12844480
1,4-phenylenebis(methylene)selenocyanate	C074153	85539-83-9	CCND1	595	Homo sapiens	9606	1,4-phenylenebis(methylene)selenocyanate results in decreased expression of CCND1 mRNA	decreases^expression	12844480|16399772
1,4-phenylenebis(methylene)selenocyanate	C074153	85539-83-9	CCND2	894	Homo sapiens	9606	1,4-phenylenebis(methylene)selenocyanate results in decreased expression of CCND2 mRNA	decreases^expression	12844480
1,4-phenylenebis(methylene)selenocyanate	C074153	85539-83-9	CDKN1A	1026	Homo sapiens	9606	1,4-phenylenebis(methylene)selenocyanate results in increased expression of CDKN1A mRNA	increases^expression	12844480
1,4-phenylenebis(methylene)selenocyanate	C074153	85539-83-9	CDKN1B	1027	Homo sapiens	9606	1,4-phenylenebis(methylene)selenocyanate results in increased expression of CDKN1B mRNA	increases^expression	12844480
1,4-phenylenebis(methylene)selenocyanate	C074153	85539-83-9	CFL2	1073	Homo sapiens	9606	1,4-phenylenebis(methylene)selenocyanate affects the expression of CFL2 protein	affects^expression	18444160
1,4-phenylenebis(methylene)selenocyanate	C074153	85539-83-9	FAS	355	Homo sapiens	9606	1,4-phenylenebis(methylene)selenocyanate results in increased expression of FAS mRNA	increases^expression	12844480
1,4-phenylenebis(methylene)selenocyanate	C074153	85539-83-9	GPX5	2880	Homo sapiens	9606	1,4-phenylenebis(methylene)selenocyanate results in increased expression of GPX5 mRNA	increases^expression	16399772
1,4-phenylenebis(methylene)selenocyanate	C074153	85539-83-9	HSPE1	3336	Homo sapiens	9606	1,4-phenylenebis(methylene)selenocyanate affects the expression of HSPE1 protein	affects^expression	18444160
1,4-phenylenebis(methylene)selenocyanate	C074153	85539-83-9	KLK3	354	Homo sapiens	9606	1,4-phenylenebis(methylene)selenocyanate results in decreased expression of KLK3 protein	decreases^expression	17205524
1,4-phenylenebis(methylene)selenocyanate	C074153	85539-83-9	MYC	4609	Homo sapiens	9606	1,4-phenylenebis(methylene)selenocyanate results in decreased expression of MYC mRNA	decreases^expression	12844480
1,4-phenylenebis(methylene)selenocyanate	C074153	85539-83-9	NFKB1	4790	Homo sapiens	9606	1,4-phenylenebis(methylene)selenocyanate results in decreased expression of NFKB1 mRNA	decreases^expression	16399772
1,4-phenylenebis(methylene)selenocyanate	C074153	85539-83-9	NME6	10201	Homo sapiens	9606	1,4-phenylenebis(methylene)selenocyanate affects the expression of NME6 protein	affects^expression	18444160
1,4-phenylenebis(methylene)selenocyanate	C074153	85539-83-9	PCNA	5111	Homo sapiens	9606	1,4-phenylenebis(methylene)selenocyanate results in decreased expression of PCNA mRNA	decreases^expression	12844480
1,4-phenylenebis(methylene)selenocyanate	C074153	85539-83-9	PTGS2	5743	Homo sapiens	9606	1,4-phenylenebis(methylene)selenocyanate results in decreased expression of PTGS2 mRNA	decreases^expression	16399772
1,4-phenylenebis(methylene)selenocyanate	C074153	85539-83-9	SSBP1	6742	Homo sapiens	9606	1,4-phenylenebis(methylene)selenocyanate affects the expression of SSBP1 protein	affects^expression	18444160
1,4-phenylenebis(methylene)selenocyanate	C074153	85539-83-9	TP53	7157	Homo sapiens	9606	1,4-phenylenebis(methylene)selenocyanate results in increased expression of TP53 mRNA	increases^expression	17205524
1,4-phenylenebis(methylene)selenocyanate, glutathione conjugate	C477941		CASP3	836	Homo sapiens	9606	1,4-phenylenebis(methylene)selenocyanate, glutathione conjugate results in increased expression of CASP3 mRNA	increases^expression	12844480
1,4-phenylenebis(methylene)selenocyanate, glutathione conjugate	C477941		CCND1	595	Homo sapiens	9606	1,4-phenylenebis(methylene)selenocyanate, glutathione conjugate results in decreased expression of CCND1 mRNA	decreases^expression	12844480
1,4-phenylenebis(methylene)selenocyanate, glutathione conjugate	C477941		CCND2	894	Homo sapiens	9606	1,4-phenylenebis(methylene)selenocyanate, glutathione conjugate results in decreased expression of CCND2 mRNA	decreases^expression	12844480
1,4-phenylenebis(methylene)selenocyanate, glutathione conjugate	C477941		CDKN1A	1026	Homo sapiens	9606	1,4-phenylenebis(methylene)selenocyanate, glutathione conjugate results in increased expression of CDKN1A mRNA	increases^expression	12844480
1,4-phenylenebis(methylene)selenocyanate, glutathione conjugate	C477941		CDKN1B	1027	Homo sapiens	9606	1,4-phenylenebis(methylene)selenocyanate, glutathione conjugate results in increased expression of CDKN1B mRNA	increases^expression	12844480
1,4-phenylenebis(methylene)selenocyanate, glutathione conjugate	C477941		FAS	355	Homo sapiens	9606	1,4-phenylenebis(methylene)selenocyanate, glutathione conjugate results in increased expression of FAS mRNA	increases^expression	12844480
1,4-phenylenebis(methylene)selenocyanate, glutathione conjugate	C477941		MYC	4609	Homo sapiens	9606	1,4-phenylenebis(methylene)selenocyanate, glutathione conjugate results in decreased expression of MYC mRNA	decreases^expression	12844480
1,4-phenylenebis(methylene)selenocyanate, glutathione conjugate	C477941		PCNA	5111	Homo sapiens	9606	1,4-phenylenebis(methylene)selenocyanate, glutathione conjugate results in decreased expression of PCNA mRNA	decreases^expression	12844480
1-((5-(1-aminoethyl)-2-(8-methoxy-2-(triflurormethyl)-5-quinolinyl)-4-oxazolyl) carbonyl)-4-((cyclopropylcarbonyl)amino)proline ethyl ester	C554440		PDE4B	5142	Homo sapiens	9606	1-((5-(1-aminoethyl)-2-(8-methoxy-2-(triflurormethyl)-5-quinolinyl)-4-oxazolyl) carbonyl)-4-((cyclopropylcarbonyl)amino)proline ethyl ester results in decreased activity of PDE4B protein	decreases^activity	20621091
1-((5-(1-aminoethyl)-2-(8-methoxy-2-(triflurormethyl)-5-quinolinyl)-4-oxazolyl) carbonyl)-4-((cyclopropylcarbonyl)amino)proline ethyl ester	C554440		PDE4D	5144	Homo sapiens	9606	1-((5-(1-aminoethyl)-2-(8-methoxy-2-(triflurormethyl)-5-quinolinyl)-4-oxazolyl) carbonyl)-4-((cyclopropylcarbonyl)amino)proline ethyl ester results in decreased activity of PDE4D protein	decreases^activity	20621091
15-acetyldeoxynivalenol	C046760	88337-96-6	ATF3	467	Homo sapiens	9606	15-acetyldeoxynivalenol results in increased expression of ATF3 mRNA	increases^expression	19101521
1-(5-chloro-1-((2,4-dimethoxyphenyl)sulfonyl)-3-(2-methoxyphenyl)-2-oxo-2,3-dihydro-1H-indol-3-yl)-4-hydroxy-N,N-dimethyl-2-pyrrolidinecarboxamide	C456029		AVPR1B	553	Homo sapiens	9606	1-(5-chloro-1-((2,4-dimethoxyphenyl)sulfonyl)-3-(2-methoxyphenyl)-2-oxo-2,3-dihydro-1H-indol-3-yl)-4-hydroxy-N,N-dimethyl-2-pyrrolidinecarboxamide results in decreased activity of AVPR1B protein	decreases^activity	15685210
1-(5-chloro-1-((2,4-dimethoxyphenyl)sulfonyl)-3-(2-methoxyphenyl)-2-oxo-2,3-dihydro-1H-indol-3-yl)-4-hydroxy-N,N-dimethyl-2-pyrrolidinecarboxamide	C456029		CFTR	1080	Homo sapiens	9606	1-(5-chloro-1-((2,4-dimethoxyphenyl)sulfonyl)-3-(2-methoxyphenyl)-2-oxo-2,3-dihydro-1H-indol-3-yl)-4-hydroxy-N,N-dimethyl-2-pyrrolidinecarboxamide results in decreased activity of CFTR protein	decreases^activity	15685210
1-((5-chloro-1H-indol-2-yl)carbonyl)-4-methylpiperazine	C484309		HRH4	59340	Homo sapiens	9606	1-((5-chloro-1H-indol-2-yl)carbonyl)-4-methylpiperazine inhibits the reaction [[4-methylhistamine binds to and results in increased activity of HRH4 protein] which results in increased abundance of Calcium]	affects^binding|decreases^reaction|increases^abundance|increases^activity	17507084
15-deoxy-delta(12,14)-prostaglandin J2	C097240		ABCC1	4363	Homo sapiens	9606	ABCC1 protein affects the export of 15-deoxy-delta(12,14)-prostaglandin J2 analog	affects^export	14979731
15-deoxy-delta(12,14)-prostaglandin J2	C097240		ABCC3	8714	Homo sapiens	9606	ABCC3 protein affects the export of 15-deoxy-delta(12,14)-prostaglandin J2 analog	affects^export	14979731
15-deoxy-delta(12,14)-prostaglandin J2	C097240		BIRC2	329	Homo sapiens	9606	15-deoxy-delta(12,14)-prostaglandin J2 results in decreased expression of BIRC2 protein	decreases^expression	15498850
15-deoxy-delta(12,14)-prostaglandin J2	C097240		BIRC3	330	Homo sapiens	9606	15-deoxy-delta(12,14)-prostaglandin J2 results in decreased expression of BIRC3 protein	decreases^expression	15498850
15-deoxy-delta(12,14)-prostaglandin J2	C097240		CASP3	836	Homo sapiens	9606	15-deoxy-delta(12,14)-prostaglandin J2 results in increased activity of CASP3 protein	increases^activity	11785780
15-deoxy-delta(12,14)-prostaglandin J2	C097240		CASP8	841	Homo sapiens	9606	15-deoxy-delta(12,14)-prostaglandin J2 results in increased cleavage of and results in increased activity of CASP8 protein	increases^activity|increases^cleavage	15498850
15-deoxy-delta(12,14)-prostaglandin J2	C097240		CASP9	842	Homo sapiens	9606	15-deoxy-delta(12,14)-prostaglandin J2 results in increased cleavage of and results in increased activity of CASP9 protein	increases^activity|increases^cleavage	15498850
15-deoxy-delta(12,14)-prostaglandin J2	C097240		CCL2	6347	Homo sapiens	9606	15-deoxy-delta(12,14)-prostaglandin J2 inhibits the reaction [[Dexamethasone binds to NR3C1 protein] which results in decreased expression of CCL2 protein]	affects^binding|decreases^expression|decreases^reaction	15187150
15-deoxy-delta(12,14)-prostaglandin J2	C097240		CCNA2	890	Homo sapiens	9606	15-deoxy-delta(12,14)-prostaglandin J2 results in decreased expression of CCNA2 protein	decreases^expression	15729575
15-deoxy-delta(12,14)-prostaglandin J2	C097240		CCNB1	891	Homo sapiens	9606	15-deoxy-delta(12,14)-prostaglandin J2 results in decreased expression of CCNB1 protein	decreases^expression	15729575
15-deoxy-delta(12,14)-prostaglandin J2	C097240		CCND3	896	Homo sapiens	9606	15-deoxy-delta(12,14)-prostaglandin J2 results in decreased expression of CCND3 protein	decreases^expression	15729575
15-deoxy-delta(12,14)-prostaglandin J2	C097240		CCNE1	898	Homo sapiens	9606	15-deoxy-delta(12,14)-prostaglandin J2 results in decreased expression of CCNE1 protein	decreases^expression	15729575
15-deoxy-delta(12,14)-prostaglandin J2	C097240		CDK2	1017	Homo sapiens	9606	15-deoxy-delta(12,14)-prostaglandin J2 results in decreased expression of CDK2 protein	decreases^expression	15729575
15-deoxy-delta(12,14)-prostaglandin J2	C097240		CDKN1A	1026	Homo sapiens	9606	15-deoxy-delta(12,14)-prostaglandin J2 results in decreased expression of CDKN1A protein	decreases^expression	15729575
15-deoxy-delta(12,14)-prostaglandin J2	C097240		CDKN1B	1027	Homo sapiens	9606	15-deoxy-delta(12,14)-prostaglandin J2 results in decreased expression of CDKN1B protein	decreases^expression	15729575
15-deoxy-delta(12,14)-prostaglandin J2	C097240		CFLAR	8837	Homo sapiens	9606	15-deoxy-delta(12,14)-prostaglandin J2 results in decreased expression of CFLAR protein	decreases^expression	15498850
15-deoxy-delta(12,14)-prostaglandin J2	C097240		CGB	1082	Homo sapiens	9606	15-deoxy-delta(12,14)-prostaglandin J2 results in increased expression of CGB mRNA	increases^expression	15941851
15-deoxy-delta(12,14)-prostaglandin J2	C097240		CHUK	1147	Homo sapiens	9606	15-deoxy-delta(12,14)-prostaglandin J2 inhibits the reaction [Tetradecanoylphorbol Acetate results in increased activity of CHUK protein]	decreases^reaction|increases^activity	15498850
15-deoxy-delta(12,14)-prostaglandin J2	C097240		CSF2	1437	Homo sapiens	9606	15-deoxy-delta(12,14)-prostaglandin J2 inhibits the reaction [IL1B protein results in increased expression of CSF2 mRNA]	decreases^reaction|increases^expression	14998300
15-deoxy-delta(12,14)-prostaglandin J2	C097240		CYP4A11	1579	Homo sapiens	9606	15-deoxy-delta(12,14)-prostaglandin J2 results in decreased expression of CYP4A11 mRNA	decreases^expression	16712844
15-deoxy-delta(12,14)-prostaglandin J2	C097240		DDX58	23586	Homo sapiens	9606	15-deoxy-delta(12,14)-prostaglandin J2 inhibits the reaction [Lipopolysaccharides results in increased expression of DDX58 mRNA]	decreases^reaction|increases^expression	16303604
15-deoxy-delta(12,14)-prostaglandin J2	C097240		FABP4	2167	Homo sapiens	9606	[15-deoxy-delta(12,14)-prostaglandin J2 co-treated with Tretinoin] results in increased expression of FABP4 mRNA	affects^cotreatment|increases^expression	16573735
15-deoxy-delta(12,14)-prostaglandin J2	C097240		FAS	355	Homo sapiens	9606	15-deoxy-delta(12,14)-prostaglandin J2 results in decreased expression of FAS mRNA	decreases^expression	16712844
15-deoxy-delta(12,14)-prostaglandin J2	C097240		GFAP	2670	Homo sapiens	9606	15-deoxy-delta(12,14)-prostaglandin J2 results in increased expression of GFAP	increases^expression	15254749
15-deoxy-delta(12,14)-prostaglandin J2	C097240		GSTM1	2944	Homo sapiens	9606	GSTM1 protein affects the metabolism of [15-deoxy-delta(12,14)-prostaglandin J2 co-treated with Glutathione]	affects^cotreatment|affects^metabolic processing	14979731
15-deoxy-delta(12,14)-prostaglandin J2	C097240		HIF1A	3091	Homo sapiens	9606	15-deoxy-delta(12,14)-prostaglandin J2 affects the stability of HIF1A protein	affects^stability	17658243
15-deoxy-delta(12,14)-prostaglandin J2	C097240		HMOX1	3162	Homo sapiens	9606	15-deoxy-delta(12,14)-prostaglandin J2 results in increased expression of HMOX1 mRNA	increases^expression	15618017
15-deoxy-delta(12,14)-prostaglandin J2	C097240		HSF1	3297	Homo sapiens	9606	HSF1 protein inhibits the reaction [15-deoxy-delta(12,14)-prostaglandin J2 results in increased expression of HMOX1 mRNA]	decreases^reaction|increases^expression	15618017
15-deoxy-delta(12,14)-prostaglandin J2	C097240		HSPB1	3315	Homo sapiens	9606	15-deoxy-delta(12,14)-prostaglandin J2 results in decreased expression of HSPB1 protein	decreases^expression	16299251
15-deoxy-delta(12,14)-prostaglandin J2	C097240		IFNG	3458	Homo sapiens	9606	15-deoxy-delta(12,14)-prostaglandin J2 results in decreased expression of IFNG protein	decreases^expression	19888466
15-deoxy-delta(12,14)-prostaglandin J2	C097240		IL1	111343	Homo sapiens	9606	15-deoxy-delta(12,14)-prostaglandin J2 inhibits the reaction [Lipopolysaccharides results in increased expression of IL1 mRNA]	decreases^reaction|increases^expression	12604364
15-deoxy-delta(12,14)-prostaglandin J2	C097240		IL1A	3552	Homo sapiens	9606	15-deoxy-delta(12,14)-prostaglandin J2 inhibits the reaction [IL1B protein results in increased expression of IL1A mRNA]	decreases^reaction|increases^expression	14998300
15-deoxy-delta(12,14)-prostaglandin J2	C097240		IL1B	3553	Homo sapiens	9606	15-deoxy-delta(12,14)-prostaglandin J2 inhibits the reaction [IL1B protein results in increased expression of CSF2 mRNA]	decreases^reaction|increases^expression	14998300
15-deoxy-delta(12,14)-prostaglandin J2	C097240		IL6	3569	Homo sapiens	9606	15-deoxy-delta(12,14)-prostaglandin J2 inhibits the reaction [IL6 protein results in increased phosphorylation of STAT1 protein]	decreases^reaction|increases^phosphorylation	12847270
15-deoxy-delta(12,14)-prostaglandin J2	C097240		IL8	3576	Homo sapiens	9606	15-deoxy-delta(12,14)-prostaglandin J2 inhibits the reaction [deoxynivalenol results in decreased degradation of IL8 mRNA]	decreases^degradation|decreases^reaction	18485432
15-deoxy-delta(12,14)-prostaglandin J2	C097240		MAPK1	5594	Homo sapiens	9606	15-deoxy-delta(12,14)-prostaglandin J2 results in decreased phosphorylation of MAPK1 protein	decreases^phosphorylation	19888466
15-deoxy-delta(12,14)-prostaglandin J2	C097240		MAPK3	5595	Homo sapiens	9606	15-deoxy-delta(12,14)-prostaglandin J2 results in decreased phosphorylation of MAPK3 protein	decreases^phosphorylation	19888466
15-deoxy-delta(12,14)-prostaglandin J2	C097240		NFKB1	4790	Homo sapiens	9606	15-deoxy-delta(12,14)-prostaglandin J2 results in decreased localization of NFKB1 protein	decreases^localization	16299251
15-deoxy-delta(12,14)-prostaglandin J2	C097240		NFKBIA	4792	Homo sapiens	9606	15-deoxy-delta(12,14)-prostaglandin J2 results in decreased phosphorylation of NFKBIA protein	decreases^phosphorylation	15498850
15-deoxy-delta(12,14)-prostaglandin J2	C097240		NR3C1	2908	Homo sapiens	9606	15-deoxy-delta(12,14)-prostaglandin J2 affects the activity of NR3C1 protein	affects^activity	15187150
15-deoxy-delta(12,14)-prostaglandin J2	C097240		PARP1	142	Homo sapiens	9606	15-deoxy-delta(12,14)-prostaglandin J2 results in increased cleavage of PARP1 protein	increases^cleavage	15498850
15-deoxy-delta(12,14)-prostaglandin J2	C097240		PPARA	5465	Homo sapiens	9606	15-deoxy-delta(12,14)-prostaglandin J2 binds to and results in increased activity of PPARA protein	affects^binding|increases^activity	9013583
15-deoxy-delta(12,14)-prostaglandin J2	C097240		PPARD	5467	Homo sapiens	9606	15-deoxy-delta(12,14)-prostaglandin J2 results in increased expression of PPARD protein	increases^expression	17341418
15-deoxy-delta(12,14)-prostaglandin J2	C097240		PPARG	5468	Homo sapiens	9606	15-deoxy-delta(12,14)-prostaglandin J2 affects the expression of PPARG	affects^expression	15254749
15-deoxy-delta(12,14)-prostaglandin J2	C097240		PTGDR2	11251	Homo sapiens	9606	15-deoxy-delta(12,14)-prostaglandin J2 binds to and results in increased activity of PTGDR2 protein	affects^binding|increases^activity	16256979
15-deoxy-delta(12,14)-prostaglandin J2	C097240		PTGS2	5743	Homo sapiens	9606	15-deoxy-delta(12,14)-prostaglandin J2 inhibits the reaction [Lipopolysaccharides results in increased expression of PTGS2 mRNA]	decreases^reaction|increases^expression	12604364
15-deoxy-delta(12,14)-prostaglandin J2	C097240		RARB	5915	Homo sapiens	9606	15-deoxy-delta(12,14)-prostaglandin J2 inhibits the reaction [ciglitazone promotes the reaction [SR 11237 results in increased expression of RARB protein]]	decreases^reaction|increases^expression|increases^reaction	12839938
15-deoxy-delta(12,14)-prostaglandin J2	C097240		RB1	5925	Homo sapiens	9606	15-deoxy-delta(12,14)-prostaglandin J2 results in decreased phosphorylation of and results in decreased expression of RB1 protein	decreases^expression|decreases^phosphorylation	15729575
15-deoxy-delta(12,14)-prostaglandin J2	C097240		RELA	5970	Homo sapiens	9606	15-deoxy-delta(12,14)-prostaglandin J2 results in decreased activity of RELA protein	decreases^activity	15498850
15-deoxy-delta(12,14)-prostaglandin J2	C097240		RXRA	6256	Homo sapiens	9606	15-deoxy-delta(12,14)-prostaglandin J2 results in increased expression of RXRA	increases^expression	15254749
15-deoxy-delta(12,14)-prostaglandin J2	C097240		STAT1	6772	Homo sapiens	9606	15-deoxy-delta(12,14)-prostaglandin J2 inhibits the reaction [IL6 protein results in increased phosphorylation of STAT1 protein]	decreases^reaction|increases^phosphorylation	12847270
15-deoxy-delta(12,14)-prostaglandin J2	C097240		STAT3	6774	Homo sapiens	9606	15-deoxy-delta(12,14)-prostaglandin J2 inhibits the reaction [IL6 protein results in increased phosphorylation of STAT3 protein]	decreases^reaction|increases^phosphorylation	12847270
15-deoxy-delta(12,14)-prostaglandin J2	C097240		TNF	7124	Homo sapiens	9606	15-deoxy-delta(12,14)-prostaglandin J2 inhibits the reaction [Lipopolysaccharides results in increased expression of TNF mRNA]	decreases^reaction|increases^expression	12604364
15-deoxy-delta(12,14)-prostaglandin J2	C097240		VIM	7431	Homo sapiens	9606	15-deoxy-delta(12,14)-prostaglandin J2 results in decreased expression of VIM	decreases^expression	15254749
15-deoxy-delta(12,14)-prostaglandin J2	C097240		XIAP	331	Homo sapiens	9606	15-deoxy-delta(12,14)-prostaglandin J2 results in decreased expression of XIAP protein	decreases^expression	16299251|15498850
15-deoxyprostaglandin J2	C477819		BIRC2	329	Homo sapiens	9606	15-deoxyprostaglandin J2 results in decreased degradation of and results in increased stability of and results in increased expression of BIRC2 protein	decreases^degradation|increases^expression|increases^stability	12623786
15-deoxyprostaglandin J2	C477819		CASP3	836	Homo sapiens	9606	15-deoxyprostaglandin J2 promotes the reaction [Camptothecin results in increased activity of CASP3 protein]	increases^activity|increases^reaction	21683069
15-deoxyprostaglandin J2	C477819		CCL11	6356	Homo sapiens	9606	15-deoxyprostaglandin J2 inhibits the reaction [RELA protein binds to CCL11 promoter]	affects^binding|decreases^reaction	15531761
15-deoxyprostaglandin J2	C477819		CCL2	6347	Homo sapiens	9606	15-deoxyprostaglandin J2 inhibits the reaction [TNF protein results in increased expression of CCL2 protein]	decreases^reaction|increases^expression	15531761
15-deoxyprostaglandin J2	C477819		CREB1	1385	Homo sapiens	9606	15-deoxyprostaglandin J2 results in decreased phosphorylation of CREB1 protein	decreases^phosphorylation	15908479
15-deoxyprostaglandin J2	C477819		EP300	2033	Homo sapiens	9606	15-deoxyprostaglandin J2 results in decreased localization of EP300 protein	decreases^localization	15641079
15-deoxyprostaglandin J2	C477819		FN1	2335	Homo sapiens	9606	15-deoxyprostaglandin J2 results in decreased expression of FN1 mRNA	decreases^expression	15908479
15-deoxyprostaglandin J2	C477819		HIST3H3	8290	Homo sapiens	9606	15-deoxyprostaglandin J2 inhibits the reaction [IL1B protein results in increased acetylation of HIST3H3 protein]	decreases^reaction|increases^acetylation	15641079
15-deoxyprostaglandin J2	C477819		HIST4H4	121504	Homo sapiens	9606	15-deoxyprostaglandin J2 inhibits the reaction [TNF protein results in increased acetylation of HIST4H4 protein]	decreases^reaction|increases^acetylation	15531761
15-deoxyprostaglandin J2	C477819		IL1A	3552	Homo sapiens	9606	15-deoxyprostaglandin J2 inhibits the reaction [Lipopolysaccharides results in increased expression of IL1A protein]	decreases^reaction|increases^expression	10866999
15-deoxyprostaglandin J2	C477819		IL1B	3553	Homo sapiens	9606	15-deoxyprostaglandin J2 inhibits the reaction [IL1B protein results in increased acetylation of HIST3H3 protein]	decreases^reaction|increases^acetylation	15641079
15-deoxyprostaglandin J2	C477819		NFKBIA	4792	Homo sapiens	9606	15-deoxyprostaglandin J2 inhibits the reaction [TNF protein results in increased degradation of NFKBIA protein]	decreases^reaction|increases^degradation	10866999
15-deoxyprostaglandin J2	C477819		NOS2	4843	Homo sapiens	9606	15-deoxyprostaglandin J2 inhibits the reaction [Lipopolysaccharides results in increased expression of NOS2 protein]	decreases^reaction|increases^expression	10866999
15-deoxyprostaglandin J2	C477819		NR3C1	2908	Homo sapiens	9606	15-deoxyprostaglandin J2 promotes the reaction [NR3C1 protein binds to PPARG protein]	affects^binding|increases^reaction	15531761
15-deoxyprostaglandin J2	C477819		PPARA	5465	Homo sapiens	9606	PPARA protein affects the reaction [15-deoxyprostaglandin J2 inhibits the reaction [TNF protein results in increased expression of CCL11 protein]]	affects^reaction|decreases^reaction|increases^expression	15531761
15-deoxyprostaglandin J2	C477819		PPARG	5468	Homo sapiens	9606	15-deoxyprostaglandin J2 promotes the reaction [NR3C1 protein binds to PPARG protein]	affects^binding|increases^reaction	15531761
15-deoxyprostaglandin J2	C477819		PTGS2	5743	Homo sapiens	9606	15-deoxyprostaglandin J2 inhibits the reaction [IL1B protein results in increased expression of PTGS2 mRNA]	decreases^reaction|increases^expression	15641079
15-deoxyprostaglandin J2	C477819		RELA	5970	Homo sapiens	9606	15-deoxyprostaglandin J2 inhibits the reaction [RELA protein binds to CCL11 promoter]	affects^binding|decreases^reaction	15531761
15-deoxyprostaglandin J2	C477819		SP1	6667	Homo sapiens	9606	15-deoxyprostaglandin J2 results in decreased expression of SP1 protein	decreases^expression	15908479
15-deoxyprostaglandin J2	C477819		TNF	7124	Homo sapiens	9606	15-deoxyprostaglandin J2 inhibits the reaction [TNF protein results in increased acetylation of HIST4H4 protein]	decreases^reaction|increases^acetylation	15531761
15-hydroxy-5,8,11,13-eicosatetraenoic acid	C025984	73945-47-8	EGF	1950	Homo sapiens	9606	15-hydroxy-5,8,11,13-eicosatetraenoic acid promotes the reaction [EGF protein affects the localization of PRKCA protein]	affects^localization|increases^reaction	15613483
15-hydroxy-5,8,11,13-eicosatetraenoic acid	C025984	73945-47-8	HGF	3082	Homo sapiens	9606	15-hydroxy-5,8,11,13-eicosatetraenoic acid promotes the reaction [HGF protein affects the localization of PRKCA protein]	affects^localization|increases^reaction	15613483
15-hydroxy-5,8,11,13-eicosatetraenoic acid	C025984	73945-47-8	PRKCA	5578	Homo sapiens	9606	15-hydroxy-5,8,11,13-eicosatetraenoic acid affects the localization of PRKCA protein	affects^localization	15613483
15-hydroxy-5,8,11,13-eicosatetraenoic acid	C025984	73945-47-8	UGT1A1	54658	Homo sapiens	9606	UGT1A1 protein results in increased glucuronidation of 15-hydroxy-5,8,11,13-eicosatetraenoic acid	increases^glucuronidation	15231852
15-hydroxy-5,8,11,13-eicosatetraenoic acid	C025984	73945-47-8	UGT1A10	54575	Homo sapiens	9606	UGT1A10 protein results in increased glucuronidation of 15-hydroxy-5,8,11,13-eicosatetraenoic acid	increases^glucuronidation	15231852
15-hydroxy-5,8,11,13-eicosatetraenoic acid	C025984	73945-47-8	UGT1A3	54659	Homo sapiens	9606	UGT1A3 protein results in increased glucuronidation of 15-hydroxy-5,8,11,13-eicosatetraenoic acid	increases^glucuronidation	15231852
15-hydroxy-5,8,11,13-eicosatetraenoic acid	C025984	73945-47-8	UGT1A4	54657	Homo sapiens	9606	UGT1A4 protein results in increased glucuronidation of 15-hydroxy-5,8,11,13-eicosatetraenoic acid	increases^glucuronidation	15231852
15-hydroxy-5,8,11,13-eicosatetraenoic acid	C025984	73945-47-8	UGT1A9	54600	Homo sapiens	9606	UGT1A9 protein results in increased glucuronidation of 15-hydroxy-5,8,11,13-eicosatetraenoic acid	increases^glucuronidation	15231852
15-hydroxy-5,8,11,13-eicosatetraenoic acid	C025984	73945-47-8	UGT2B7	7364	Homo sapiens	9606	UGT2B7 protein results in increased glucuronidation of 15-hydroxy-5,8,11,13-eicosatetraenoic acid	increases^glucuronidation	15231852
1,5-isoquinolinediol	C402108		BCL2	596	Homo sapiens	9606	[1,5-isoquinolinediol co-treated with Tretinoin] results in decreased expression of BCL2 protein	affects^cotreatment|decreases^expression	10713328
1-(5-isoquinolinylsulfonyl)-3-methylpiperazine	C080501	84477-73-6	TXNRD1	7296	Homo sapiens	9606	1-(5-isoquinolinylsulfonyl)-3-methylpiperazine inhibits the reaction [sulforafan results in increased expression of TXNRD1 mRNA]	decreases^reaction|increases^expression	12663510
15R-methyl prostaglandin D2	C532725		PTGDR2	11251	Homo sapiens	9606	15R-methyl prostaglandin D2 binds to and results in increased activity of PTGDR2 protein	affects^binding|increases^activity	16256979
1-(6-((3-methoxyestra-1,3,5(10)-trien-17-yl)amino)hexyl)-1H-pyrrole-2,5-dione	C060229	112648-68-7	ADRA2A	150	Homo sapiens	9606	1-(6-((3-methoxyestra-1,3,5(10)-trien-17-yl)amino)hexyl)-1H-pyrrole-2,5-dione inhibits the reaction [Norepinephrine binds to and results in increased activity of ADRA2A protein]	affects^binding|decreases^reaction|increases^activity	10742289
1-(6-((3-methoxyestra-1,3,5(10)-trien-17-yl)amino)hexyl)-1H-pyrrole-2,5-dione	C060229	112648-68-7	AKT1	207	Homo sapiens	9606	1-(6-((3-methoxyestra-1,3,5(10)-trien-17-yl)amino)hexyl)-1H-pyrrole-2,5-dione inhibits the reaction [NTS protein results in increased phosphorylation of and results in increased activity of AKT1 protein]	decreases^reaction|increases^activity|increases^phosphorylation	15177934
1-(6-((3-methoxyestra-1,3,5(10)-trien-17-yl)amino)hexyl)-1H-pyrrole-2,5-dione	C060229	112648-68-7	APOA1	335	Homo sapiens	9606	1-(6-((3-methoxyestra-1,3,5(10)-trien-17-yl)amino)hexyl)-1H-pyrrole-2,5-dione inhibits the reaction [Phosphatidylinositols results in increased expression of APOA1 protein]	decreases^reaction|increases^expression	19013290
1-(6-((3-methoxyestra-1,3,5(10)-trien-17-yl)amino)hexyl)-1H-pyrrole-2,5-dione	C060229	112648-68-7	CASP3	836	Homo sapiens	9606	1-(6-((3-methoxyestra-1,3,5(10)-trien-17-yl)amino)hexyl)-1H-pyrrole-2,5-dione inhibits the reaction [Pilocarpine results in increased activity of CASP3 protein]	decreases^reaction|increases^activity	19927300
1-(6-((3-methoxyestra-1,3,5(10)-trien-17-yl)amino)hexyl)-1H-pyrrole-2,5-dione	C060229	112648-68-7	CD40	958	Homo sapiens	9606	1-(6-((3-methoxyestra-1,3,5(10)-trien-17-yl)amino)hexyl)-1H-pyrrole-2,5-dione inhibits the reaction [Carbachol results in increased expression of CD40 protein]	decreases^reaction|increases^expression	16879495
1-(6-((3-methoxyestra-1,3,5(10)-trien-17-yl)amino)hexyl)-1H-pyrrole-2,5-dione	C060229	112648-68-7	CSF2	1437	Homo sapiens	9606	1-(6-((3-methoxyestra-1,3,5(10)-trien-17-yl)amino)hexyl)-1H-pyrrole-2,5-dione inhibits the reaction [kaempferol results in increased secretion of CSF2 protein]	decreases^reaction|increases^secretion	18346843
1-(6-((3-methoxyestra-1,3,5(10)-trien-17-yl)amino)hexyl)-1H-pyrrole-2,5-dione	C060229	112648-68-7	EGFR	1956	Homo sapiens	9606	1-(6-((3-methoxyestra-1,3,5(10)-trien-17-yl)amino)hexyl)-1H-pyrrole-2,5-dione inhibits the reaction [NTS protein results in increased phosphorylation of and results in increased activity of EGFR protein]	decreases^reaction|increases^activity|increases^phosphorylation	15177934
1-(6-((3-methoxyestra-1,3,5(10)-trien-17-yl)amino)hexyl)-1H-pyrrole-2,5-dione	C060229	112648-68-7	MAPK1	5594	Homo sapiens	9606	1-(6-((3-methoxyestra-1,3,5(10)-trien-17-yl)amino)hexyl)-1H-pyrrole-2,5-dione inhibits the reaction [Adenosine Triphosphate results in increased phosphorylation of MAPK1 protein]	decreases^reaction|increases^phosphorylation	15034929
1-(6-((3-methoxyestra-1,3,5(10)-trien-17-yl)amino)hexyl)-1H-pyrrole-2,5-dione	C060229	112648-68-7	MAPK3	5595	Homo sapiens	9606	1-(6-((3-methoxyestra-1,3,5(10)-trien-17-yl)amino)hexyl)-1H-pyrrole-2,5-dione inhibits the reaction [Adenosine Triphosphate results in increased phosphorylation of MAPK3 protein]	decreases^reaction|increases^phosphorylation	15034929
1-(6-((3-methoxyestra-1,3,5(10)-trien-17-yl)amino)hexyl)-1H-pyrrole-2,5-dione	C060229	112648-68-7	MAPK8	5599	Homo sapiens	9606	1-(6-((3-methoxyestra-1,3,5(10)-trien-17-yl)amino)hexyl)-1H-pyrrole-2,5-dione inhibits the reaction [Pilocarpine results in increased activity of MAPK8 protein]	decreases^reaction|increases^activity	19927300
1-(6-((3-methoxyestra-1,3,5(10)-trien-17-yl)amino)hexyl)-1H-pyrrole-2,5-dione	C060229	112648-68-7	NTS	4922	Homo sapiens	9606	1-(6-((3-methoxyestra-1,3,5(10)-trien-17-yl)amino)hexyl)-1H-pyrrole-2,5-dione inhibits the reaction [NTS protein results in increased phosphorylation of and results in increased activity of AKT1 protein]	decreases^reaction|increases^activity|increases^phosphorylation	15177934
16 alpha-bromo-17 beta-estradiol	C034554	54982-79-5	ESR1	2099	Homo sapiens	9606	16 alpha-bromo-17 beta-estradiol binds to ESR1 protein	affects^binding	9751507
1,6-bis(cyclohexyloximinocarbonyl)hexane	C036535	83654-05-1	ABHD16A	7920	Homo sapiens	9606	1,6-bis(cyclohexyloximinocarbonyl)hexane results in decreased activity of ABHD16A protein	decreases^activity	18657971
1,6-bis(cyclohexyloximinocarbonyl)hexane	C036535	83654-05-1	FAAH	2166	Homo sapiens	9606	1,6-bis(cyclohexyloximinocarbonyl)hexane results in decreased activity of FAAH protein	decreases^activity	18657971
1,6-bis(cyclohexyloximinocarbonyl)hexane	C036535	83654-05-1	PLA2G7	7941	Homo sapiens	9606	1,6-bis(cyclohexyloximinocarbonyl)hexane results in decreased activity of PLA2G7 protein	decreases^activity	18657971
1,6-dichlorosucrose	C039464	61854-83-9	TAS1R2	80834	Homo sapiens	9606	1,6-dichlorosucrose results in increased activity of [TAS1R2 protein binds to TAS1R3 protein]	affects^binding|increases^activity	20173092
1,6-dichlorosucrose	C039464	61854-83-9	TAS1R3	83756	Homo sapiens	9606	1,6-dichlorosucrose results in increased activity of [TAS1R2 protein binds to TAS1R3 protein]	affects^binding|increases^activity	20173092
1,6-dimethylnaphthalene	C466921		CYP1A2	1544	Homo sapiens	9606	1,6-dimethylnaphthalene results in decreased activity of CYP1A2 protein	decreases^activity	15916432
1,6-dinitropyrene	C033309	42397-64-8	CYP1A1	1543	Homo sapiens	9606	1,6-dinitropyrene results in increased expression of CYP1A1 mRNA	increases^expression	12107646
1,6-dinitropyrene	C033309	42397-64-8	CYP3A4	1576	Homo sapiens	9606	CYP3A4 protein affects the metabolism of 1,6-dinitropyrene	affects^metabolic processing	2180560
1,6-hexamethylene diisocyanate	C015262	822-06-0	GSTM1	2944	Homo sapiens	9606	GSTM1 protein polymorphism results in increased susceptibility to 1,6-hexamethylene diisocyanate	increases^response to substance	11927838
1,6-hexamethylene diisocyanate	C015262	822-06-0	ICAM1	3383	Homo sapiens	9606	1,6-hexamethylene diisocyanate results in increased expression of ICAM1 protein	increases^expression	11698162
1,6-hexamethylene diisocyanate	C015262	822-06-0	NAT1	9	Homo sapiens	9606	NAT1 protein polymorphism results in increased susceptibility to 1,6-hexamethylene diisocyanate	increases^response to substance	11927838
1,6-hexamethylene diisocyanate	C015262	822-06-0	NAT2	10	Homo sapiens	9606	NAT2 protein polymorphism results in increased susceptibility to 1,6-hexamethylene diisocyanate	increases^response to substance	11927838
16-hydroxyestrone	C026702	18186-49-7	PRDX4	10549	Homo sapiens	9606	16-hydroxyestrone results in increased expression of PRDX4 mRNA	increases^expression	18272409
16-ketoestrone	C002591	1228-73-5	AKR1A1	10327	Homo sapiens	9606	AKR1A1 protein results in increased reduction of 16-ketoestrone	increases^reduction	10510318
16-ketoestrone	C002591	1228-73-5	AKR1B1	231	Homo sapiens	9606	AKR1B1 protein results in increased reduction of 16-ketoestrone	increases^reduction	10510318
16-ketoestrone	C002591	1228-73-5	AKR7A2	8574	Homo sapiens	9606	AKR7A2 protein results in increased reduction of 16-ketoestrone	increases^reduction	10510318
16-ketoestrone	C002591	1228-73-5	ESR2	2100	Homo sapiens	9606	16-ketoestrone binds to ESR2 protein	affects^binding	16728493
17-(4'-ethynyldimethylbenzylamine)-17-testosterone	C560081		AR	367	Homo sapiens	9606	17-(4'-ethynyldimethylbenzylamine)-17-testosterone binds to AR protein	affects^binding	21334280
17-(allylamino)-17-demethoxygeldanamycin	C112765		AKT1	207	Homo sapiens	9606	17-(allylamino)-17-demethoxygeldanamycin results in decreased expression of AKT1 protein	decreases^expression	17157164|16923571
17-(allylamino)-17-demethoxygeldanamycin	C112765		AR	367	Homo sapiens	9606	17-(allylamino)-17-demethoxygeldanamycin results in decreased expression of AR protein	decreases^expression	17010675
17-(allylamino)-17-demethoxygeldanamycin	C112765		BCL2	596	Homo sapiens	9606	17-(allylamino)-17-demethoxygeldanamycin results in decreased expression of BCL2 protein	decreases^expression	16923571
17-(allylamino)-17-demethoxygeldanamycin	C112765		BCL2L1	598	Homo sapiens	9606	17-(allylamino)-17-demethoxygeldanamycin results in decreased expression of BCL2L1 protein	decreases^expression	16923571
17-(allylamino)-17-demethoxygeldanamycin	C112765		CASP3	836	Homo sapiens	9606	[17-(allylamino)-17-demethoxygeldanamycin co-treated with TNFSF10 protein] results in increased activity of CASP3 protein	affects^cotreatment|increases^activity	15993848
17-(allylamino)-17-demethoxygeldanamycin	C112765		CASP8	841	Homo sapiens	9606	[17-(allylamino)-17-demethoxygeldanamycin co-treated with Sirolimus] results in increased cleavage of CASP8 protein	affects^cotreatment|increases^cleavage	17121904
17-(allylamino)-17-demethoxygeldanamycin	C112765		CASP9	842	Homo sapiens	9606	[17-(allylamino)-17-demethoxygeldanamycin co-treated with Sirolimus] results in increased cleavage of CASP9 protein	affects^cotreatment|increases^cleavage	17121904
17-(allylamino)-17-demethoxygeldanamycin	C112765		CCND1	595	Homo sapiens	9606	17-(allylamino)-17-demethoxygeldanamycin results in decreased expression of CCND1 protein	decreases^expression	17121904|17157164
17-(allylamino)-17-demethoxygeldanamycin	C112765		CDK4	1019	Homo sapiens	9606	17-(allylamino)-17-demethoxygeldanamycin results in decreased expression of CDK4 protein	decreases^expression	17157164
17-(allylamino)-17-demethoxygeldanamycin	C112765		CDK8	1024	Homo sapiens	9606	17-(allylamino)-17-demethoxygeldanamycin results in decreased expression of CDK8 protein	decreases^expression	17157164
17-(allylamino)-17-demethoxygeldanamycin	C112765		CYP3A5	1577	Homo sapiens	9606	CYP3A5 protein affects the metabolism of 17-(allylamino)-17-demethoxygeldanamycin	affects^metabolic processing	15718306
17-(allylamino)-17-demethoxygeldanamycin	C112765		EGFR	1956	Homo sapiens	9606	17-(allylamino)-17-demethoxygeldanamycin results in decreased expression of EGFR protein	decreases^expression	17010675
17-(allylamino)-17-demethoxygeldanamycin	C112765		ERBB2	2064	Homo sapiens	9606	17-(allylamino)-17-demethoxygeldanamycin results in increased degradation of and results in decreased expression of ERBB2 protein	decreases^expression|increases^degradation	16061882
17-(allylamino)-17-demethoxygeldanamycin	C112765		FGFR3	2261	Homo sapiens	9606	17-(allylamino)-17-demethoxygeldanamycin results in increased degradation of and results in decreased expression of FGFR3 protein	decreases^expression|increases^degradation	16061882
17-(allylamino)-17-demethoxygeldanamycin	C112765		FLT3	2322	Homo sapiens	9606	17-(allylamino)-17-demethoxygeldanamycin results in decreased expression of FLT3 protein	decreases^expression	17010675
17-(allylamino)-17-demethoxygeldanamycin	C112765		HSP90	692420	Homo sapiens	9606	17-(allylamino)-17-demethoxygeldanamycin results in decreased activity of HSP90 protein	decreases^activity	16061882
17-(allylamino)-17-demethoxygeldanamycin	C112765		HSP90AA1	3320	Homo sapiens	9606	17-(allylamino)-17-demethoxygeldanamycin results in decreased expression of HSP90AA1 protein	decreases^expression	18830594
17-(allylamino)-17-demethoxygeldanamycin	C112765		HSPA4	3308	Homo sapiens	9606	17-(allylamino)-17-demethoxygeldanamycin results in increased expression of HSPA4 protein	increases^expression	16311509
17-(allylamino)-17-demethoxygeldanamycin	C112765		HSPA5	3309	Homo sapiens	9606	17-(allylamino)-17-demethoxygeldanamycin results in increased expression of HSPA5 protein	increases^expression	16357177
17-(allylamino)-17-demethoxygeldanamycin	C112765		KIT	3815	Homo sapiens	9606	17-(allylamino)-17-demethoxygeldanamycin results in decreased expression of KIT protein	decreases^expression	16213582
17-(allylamino)-17-demethoxygeldanamycin	C112765		MAPK1	5594	Homo sapiens	9606	17-(allylamino)-17-demethoxygeldanamycin results in decreased phosphorylation of MAPK1 protein	decreases^phosphorylation	17157164
17-(allylamino)-17-demethoxygeldanamycin	C112765		MAPK3	5595	Homo sapiens	9606	17-(allylamino)-17-demethoxygeldanamycin results in decreased phosphorylation of MAPK3 protein	decreases^phosphorylation	17157164
17-(allylamino)-17-demethoxygeldanamycin	C112765		MCL1	4170	Homo sapiens	9606	17-(allylamino)-17-demethoxygeldanamycin results in decreased expression of MCL1 protein	decreases^expression	16923571
17-(allylamino)-17-demethoxygeldanamycin	C112765		MDM2	4193	Homo sapiens	9606	17-(allylamino)-17-demethoxygeldanamycin results in increased degradation of MDM2 protein	increases^degradation	17157164
17-(allylamino)-17-demethoxygeldanamycin	C112765		NQO1	1728	Homo sapiens	9606	NQO1 protein results in increased susceptibility to 17-(allylamino)-17-demethoxygeldanamycin	increases^response to substance	10564678
17-(allylamino)-17-demethoxygeldanamycin	C112765		RAF1	5894	Homo sapiens	9606	17-(allylamino)-17-demethoxygeldanamycin results in decreased expression of RAF1 protein	decreases^expression	10564678
17-(allylamino)-17-demethoxygeldanamycin	C112765		RB1	5925	Homo sapiens	9606	[17-(allylamino)-17-demethoxygeldanamycin co-treated with Sirolimus] results in decreased phosphorylation of RB1 protein	affects^cotreatment|decreases^phosphorylation	17121904
17-(allylamino)-17-demethoxygeldanamycin	C112765		RPS6	6194	Homo sapiens	9606	17-(allylamino)-17-demethoxygeldanamycin results in decreased phosphorylation of RPS6 protein	decreases^phosphorylation	17121904
17-(allylamino)-17-demethoxygeldanamycin	C112765		TNFSF10	8743	Homo sapiens	9606	[17-(allylamino)-17-demethoxygeldanamycin co-treated with TNFSF10 protein] results in decreased expression of XIAP protein	affects^cotreatment|decreases^expression	15993848
17-(allylamino)-17-demethoxygeldanamycin	C112765		TP53	7157	Homo sapiens	9606	17-(allylamino)-17-demethoxygeldanamycin results in decreased expression of TP53 protein	decreases^expression	10564678
17-(allylamino)-17-demethoxygeldanamycin	C112765		TYMS	7298	Homo sapiens	9606	17-(allylamino)-17-demethoxygeldanamycin results in decreased expression of TYMS protein	decreases^expression	18830594
17-(allylamino)-17-demethoxygeldanamycin	C112765		XIAP	331	Homo sapiens	9606	[17-(allylamino)-17-demethoxygeldanamycin co-treated with TNFSF10 protein] results in decreased expression of XIAP protein	affects^cotreatment|decreases^expression	15993848
17-alpha-hydroxy-progesterone caproate	C020365	630-56-8	CYP3A4	1576	Homo sapiens	9606	CYP3A4 protein affects the metabolism of 17-alpha-hydroxy-progesterone caproate	affects^metabolic processing	20097724
17-alpha-hydroxy-progesterone caproate	C020365	630-56-8	CYP3A7	1551	Homo sapiens	9606	CYP3A7 protein affects the metabolism of 17-alpha-hydroxy-progesterone caproate	affects^metabolic processing	20097724
17-alpha-hydroxy-progesterone caproate	C020365	630-56-8	FKBP5	2289	Homo sapiens	9606	17-alpha-hydroxy-progesterone caproate inhibits the reaction [Dexamethasone results in increased expression of FKBP5 mRNA]	decreases^reaction|increases^expression	19255438
17-alpha-hydroxy-progesterone caproate	C020365	630-56-8	FSHB	2488	Homo sapiens	9606	17-alpha-hydroxy-progesterone caproate results in decreased expression of FSHB protein	decreases^expression	9208491|8082440
17-alpha-hydroxy-progesterone caproate	C020365	630-56-8	IL1B	3553	Homo sapiens	9606	17-alpha-hydroxy-progesterone caproate results in decreased secretion of IL1B protein	decreases^secretion	18756431
17-alpha-hydroxy-progesterone caproate	C020365	630-56-8	IL6	3569	Homo sapiens	9606	17-alpha-hydroxy-progesterone caproate inhibits the reaction [Lipopolysaccharides results in increased expression of IL6 protein]	decreases^reaction|increases^expression	20810098
17-alpha-hydroxy-progesterone caproate	C020365	630-56-8	LHB	3972	Homo sapiens	9606	17-alpha-hydroxy-progesterone caproate results in decreased expression of LHB protein	decreases^expression	9208491|8082440
17-alpha-hydroxy-progesterone caproate	C020365	630-56-8	NR3C1	2908	Homo sapiens	9606	17-alpha-hydroxy-progesterone caproate binds to and results in decreased activity of and results in increased localization of NR3C1 protein	affects^binding|decreases^activity|increases^localization	19255438
17-alpha-hydroxy-progesterone caproate	C020365	630-56-8	PGR	5241	Homo sapiens	9606	17-alpha-hydroxy-progesterone caproate binds to and results in increased activity of PGR protein	affects^binding|increases^activity	18060946
17-alpha-hydroxy-progesterone caproate	C020365	630-56-8	TNF	7124	Homo sapiens	9606	[17-alpha-hydroxy-progesterone caproate co-treated with Lipopolysaccharides] results in increased expression of TNF protein	affects^cotreatment|increases^expression	16318612
17-alpha-hydroxy-progesterone caproate	C020365	630-56-8	TSC22D3	1831	Homo sapiens	9606	17-alpha-hydroxy-progesterone caproate inhibits the reaction [Dexamethasone results in increased expression of TSC22D3 mRNA]	decreases^reaction|increases^expression	19255438
17-amino-17-demethoxygeldanamycin -C2-galactose	C515135		NQO1	1728	Homo sapiens	9606	NQO1 protein results in increased reduction of 17-amino-17-demethoxygeldanamycin -C2-galactose	increases^reduction	16825487
1,7-bis(4-hydroxy-3-methoxyphenyl)-1,4,6-heptatrien-3-one	C471106		AR	367	Homo sapiens	9606	1,7-bis(4-hydroxy-3-methoxyphenyl)-1,4,6-heptatrien-3-one results in increased degradation of AR protein	increases^degradation	18639551
17-(dimethylaminoethylamino)-17-demethoxygeldanamycin	C448659		CASP3	836	Homo sapiens	9606	17-(dimethylaminoethylamino)-17-demethoxygeldanamycin inhibits the reaction [Doxorubicin results in increased activity of CASP3 protein]	decreases^reaction|increases^activity	17085670
17-(dimethylaminoethylamino)-17-demethoxygeldanamycin	C448659		CCND1	595	Homo sapiens	9606	[17-(dimethylaminoethylamino)-17-demethoxygeldanamycin co-treated with vorinostat] results in decreased expression of CCND1 protein	affects^cotreatment|decreases^expression	19440035
17-(dimethylaminoethylamino)-17-demethoxygeldanamycin	C448659		CDK4	1019	Homo sapiens	9606	[17-(dimethylaminoethylamino)-17-demethoxygeldanamycin co-treated with vorinostat] results in decreased expression of CDK4 protein	affects^cotreatment|decreases^expression	19440035
17-(dimethylaminoethylamino)-17-demethoxygeldanamycin	C448659		CDKN1A	1026	Homo sapiens	9606	17-(dimethylaminoethylamino)-17-demethoxygeldanamycin results in increased expression of CDKN1A protein	increases^expression	19440035
17-(dimethylaminoethylamino)-17-demethoxygeldanamycin	C448659		CDKN1B	1027	Homo sapiens	9606	17-(dimethylaminoethylamino)-17-demethoxygeldanamycin results in increased expression of CDKN1B protein	increases^expression	19440035
17-(dimethylaminoethylamino)-17-demethoxygeldanamycin	C448659		CHEK1	1111	Homo sapiens	9606	17-(dimethylaminoethylamino)-17-demethoxygeldanamycin inhibits the reaction [Doxorubicin results in increased phosphorylation of CHEK1 protein]	decreases^reaction|increases^phosphorylation	17085670
17-(dimethylaminoethylamino)-17-demethoxygeldanamycin	C448659		MYC	4609	Homo sapiens	9606	[17-(dimethylaminoethylamino)-17-demethoxygeldanamycin co-treated with vorinostat] results in decreased expression of MYC protein	affects^cotreatment|decreases^expression	19440035
17-(dimethylaminoethylamino)-17-demethoxygeldanamycin	C448659		NQO1	1728	Homo sapiens	9606	5-methoxy-1,2-dimethyl-3-((4-nitrophenoxy)methyl)indole-4,7-dione inhibits the reaction [NQO1 protein results in increased reduction of 17-(dimethylaminoethylamino)-17-demethoxygeldanamycin]	decreases^reaction|increases^reduction	16825487
17-(dimethylaminoethylamino)-17-demethoxygeldanamycin	C448659		RAF1	5894	Homo sapiens	9606	[17-(dimethylaminoethylamino)-17-demethoxygeldanamycin co-treated with vorinostat] results in decreased expression of RAF1 protein	affects^cotreatment|decreases^expression	19440035
17-(dimethylaminoethylamino)-17-demethoxygeldanamycin	C448659		TLR4	7099	Homo sapiens	9606	17-(dimethylaminoethylamino)-17-demethoxygeldanamycin inhibits the reaction [morphine-3-glucuronide results in increased activity of TLR4 protein]	decreases^reaction|increases^activity	19833175
17-(dimethylaminoethylamino)-17-demethoxygeldanamycin	C448659		TP53	7157	Homo sapiens	9606	TP53 gene affects the susceptibility to 17-(dimethylaminoethylamino)-17-demethoxygeldanamycin	affects^response to substance	17085670
1,7-dimethyluric acid	C053084	33868-03-0	CYP2A6	1548	Homo sapiens	9606	CYP2A6 protein results in increased chemical synthesis of 1,7-dimethyluric acid	increases^chemical synthesis	12505289
1,7-dimethylxanthine	C021183	611-59-6	CYP1A2	1544	Homo sapiens	9606	CYP1A2 protein results in increased hydroxylation of 1,7-dimethylxanthine	increases^hydroxylation	15980104
1,7-dimethylxanthine	C021183	611-59-6	CYP2A6	1548	Homo sapiens	9606	CYP2A6 protein affects the metabolism of and results in increased activity of 1,7-dimethylxanthine	affects^metabolic processing|increases^activity	12505289
17-N,N-diethylcarbamoyl-4-methyl-4-azaandrostane-3-one	C031563	73671-86-0	SRD5A1	6715	Homo sapiens	9606	17-N,N-diethylcarbamoyl-4-methyl-4-azaandrostane-3-one results in decreased activity of SRD5A1 protein	decreases^activity	8142312
18alpha-glycyrrhetinic acid	C119129	1449-05-4	AKR1C3	8644	Homo sapiens	9606	18alpha-glycyrrhetinic acid affects the activity of AKR1C3 protein	affects^activity	11165023
1,8-dinitropyrene	C033310	42397-65-9	CYP1A1	1543	Homo sapiens	9606	1,8-dinitropyrene results in increased expression of CYP1A1 mRNA	increases^expression	12107646
18-hydroxycortisol	C033689	81705-06-8	CYP11B1	1584	Homo sapiens	9606	CYP11B1 protein affects the chemical synthesis of 18-hydroxycortisol	affects^chemical synthesis	15356073
18-hydroxycortisol	C033689	81705-06-8	CYP11B2	1585	Homo sapiens	9606	CYP11B2 protein affects the chemical synthesis of 18-hydroxycortisol	affects^chemical synthesis	15356073
18-hydroxycortisol	C033689	81705-06-8	POMC	5443	Homo sapiens	9606	POMC protein results in increased abundance of 18-hydroxycortisol	increases^abundance	3015796
18-hydroxydeoxycorticosterone	C042509	379-68-0	CYP11B1	1584	Homo sapiens	9606	18-hydroxydeoxycorticosterone results in decreased activity of CYP11B1 protein	decreases^activity	11549669
18-hydroxydeoxycorticosterone	C042509	379-68-0	CYP11B2	1585	Homo sapiens	9606	18-hydroxydeoxycorticosterone results in decreased activity of CYP11B2 protein	decreases^activity	11549669
18-oxocortisol	C038135	2410-60-8	CYP11B2	1585	Homo sapiens	9606	CYP11B2 protein affects the chemical synthesis of 18-oxocortisol	affects^chemical synthesis	15356073
1'-acetoxychavicol acetate	C047948	52946-22-2	BCL2	596	Homo sapiens	9606	1'-acetoxychavicol acetate inhibits the reaction [TNF protein results in increased expression of BCL2 protein]	decreases^reaction|increases^expression	15905586
1'-acetoxychavicol acetate	C047948	52946-22-2	BCL2A1	597	Homo sapiens	9606	1'-acetoxychavicol acetate inhibits the reaction [TNF protein results in increased expression of BCL2A1 protein]	decreases^reaction|increases^expression	15905586
1'-acetoxychavicol acetate	C047948	52946-22-2	BCL2L1	598	Homo sapiens	9606	1'-acetoxychavicol acetate inhibits the reaction [TNF protein results in increased expression of BCL2L1 protein]	decreases^reaction|increases^expression	15905586
1'-acetoxychavicol acetate	C047948	52946-22-2	BIRC2	329	Homo sapiens	9606	1'-acetoxychavicol acetate inhibits the reaction [TNF protein results in increased expression of BIRC2 protein]	decreases^reaction|increases^expression	15905586
1'-acetoxychavicol acetate	C047948	52946-22-2	BIRC3	330	Homo sapiens	9606	1'-acetoxychavicol acetate inhibits the reaction [TNF protein results in increased expression of BIRC3 protein]	decreases^reaction|increases^expression	15905586
1'-acetoxychavicol acetate	C047948	52946-22-2	BIRC5	332	Homo sapiens	9606	1'-acetoxychavicol acetate inhibits the reaction [TNF protein results in increased expression of BIRC5 protein]	decreases^reaction|increases^expression	15905586
1'-acetoxychavicol acetate	C047948	52946-22-2	CCND1	595	Homo sapiens	9606	1'-acetoxychavicol acetate inhibits the reaction [TNF protein results in increased expression of CCND1 protein]	decreases^reaction|increases^expression	15905586
1'-acetoxychavicol acetate	C047948	52946-22-2	CFLAR	8837	Homo sapiens	9606	1'-acetoxychavicol acetate inhibits the reaction [TNF protein results in increased expression of CFLAR protein]	decreases^reaction|increases^expression	15905586
1'-acetoxychavicol acetate	C047948	52946-22-2	CHUK	1147	Homo sapiens	9606	1'-acetoxychavicol acetate inhibits the reaction [TNF protein results in increased activity of CHUK protein]	decreases^reaction|increases^activity	15905586
1'-acetoxychavicol acetate	C047948	52946-22-2	ICAM1	3383	Homo sapiens	9606	1'-acetoxychavicol acetate inhibits the reaction [TNF protein results in increased expression of ICAM1 protein]	decreases^reaction|increases^expression	15905586
1'-acetoxychavicol acetate	C047948	52946-22-2	IKBKB	3551	Homo sapiens	9606	1'-acetoxychavicol acetate inhibits the reaction [TNF protein results in increased activity of IKBKB protein]	decreases^reaction|increases^activity	15905586
1'-acetoxychavicol acetate	C047948	52946-22-2	IL1B	3553	Homo sapiens	9606	1'-acetoxychavicol acetate inhibits the reaction [IL1B protein results in increased activity of NFKB1 protein]	decreases^reaction|increases^activity	15905586
1'-acetoxychavicol acetate	C047948	52946-22-2	MAP3K14	9020	Homo sapiens	9606	1'-acetoxychavicol acetate inhibits the reaction [TNF protein results in increased expression of MAP3K14 protein]	decreases^reaction|increases^expression	15905586
1'-acetoxychavicol acetate	C047948	52946-22-2	MMP9	4318	Homo sapiens	9606	1'-acetoxychavicol acetate inhibits the reaction [TNF protein results in increased expression of MMP9 protein]	decreases^reaction|increases^expression	15905586
1'-acetoxychavicol acetate	C047948	52946-22-2	MYC	4609	Homo sapiens	9606	1'-acetoxychavicol acetate inhibits the reaction [TNF protein results in increased expression of MYC protein]	decreases^reaction|increases^expression	15905586
1'-acetoxychavicol acetate	C047948	52946-22-2	NFKB1	4790	Homo sapiens	9606	1'-acetoxychavicol acetate inhibits the reaction [Doxorubicin results in increased activity of NFKB1 protein]	decreases^reaction|increases^activity	15905586
1'-acetoxychavicol acetate	C047948	52946-22-2	NFKBIA	4792	Homo sapiens	9606	1'-acetoxychavicol acetate inhibits the reaction [TNF protein results in increased degradation of NFKBIA protein]	decreases^reaction|increases^degradation	15905586
1'-acetoxychavicol acetate	C047948	52946-22-2	PARP1	142	Homo sapiens	9606	1'-acetoxychavicol acetate promotes the reaction [TNF protein results in increased cleavage of PARP1 protein]	increases^cleavage|increases^reaction	15905586
1'-acetoxychavicol acetate	C047948	52946-22-2	PTGS2	5743	Homo sapiens	9606	1'-acetoxychavicol acetate inhibits the reaction [TNF protein results in increased expression of PTGS2 protein]	decreases^reaction|increases^expression	15905586
1'-acetoxychavicol acetate	C047948	52946-22-2	RELA	5970	Homo sapiens	9606	1'-acetoxychavicol acetate inhibits the reaction [Doxorubicin results in increased activity of RELA protein]	decreases^reaction|increases^activity	15905586
1'-acetoxychavicol acetate	C047948	52946-22-2	TNF	7124	Homo sapiens	9606	1'-acetoxychavicol acetate inhibits the reaction [TNF protein affects the localization of RELA protein]	affects^localization|decreases^reaction	15905586
1'-acetoxychavicol acetate	C047948	52946-22-2	TNFRSF1A	7132	Homo sapiens	9606	1'-acetoxychavicol acetate inhibits the reaction [TNF protein results in increased expression of TNFRSF1A protein]	decreases^reaction|increases^expression	15905586
1'-acetoxychavicol acetate	C047948	52946-22-2	TRADD	8717	Homo sapiens	9606	1'-acetoxychavicol acetate inhibits the reaction [TNF protein results in increased expression of TRADD protein]	decreases^reaction|increases^expression	15905586
1'-acetoxychavicol acetate	C047948	52946-22-2	TRAF1	7185	Homo sapiens	9606	1'-acetoxychavicol acetate inhibits the reaction [TNF protein results in increased expression of TRAF1 protein]	decreases^reaction|increases^expression	15905586
1'-acetoxychavicol acetate	C047948	52946-22-2	TRAF2	7186	Homo sapiens	9606	1'-acetoxychavicol acetate inhibits the reaction [TNF protein results in increased expression of TRAF2 protein]	decreases^reaction|increases^expression	15905586
1'-acetoxychavicol acetate	C047948	52946-22-2	VEGFA	7422	Homo sapiens	9606	1'-acetoxychavicol acetate inhibits the reaction [TNF protein results in increased expression of VEGFA protein]	decreases^reaction|increases^expression	15905586
1'-acetoxychavicol acetate	C047948	52946-22-2	XIAP	331	Homo sapiens	9606	1'-acetoxychavicol acetate inhibits the reaction [TNF protein results in increased expression of XIAP protein]	decreases^reaction|increases^expression	15905586
1-acyl-2-(12-((7-nitrobenz-2-oxa-1,3-diazol-4-yl)amino)dodecanoyl)phosphatidylcholine	C078632		FADS2	9415	Homo sapiens	9606	FADS2 protein affects the reaction [Amiodarone results in increased uptake of 1-acyl-2-(12-((7-nitrobenz-2-oxa-1,3-diazol-4-yl)amino)dodecanoyl)phosphatidylcholine]	affects^reaction|increases^uptake	21123845
1-acyl-2-(12-((7-nitrobenz-2-oxa-1,3-diazol-4-yl)amino)dodecanoyl)phosphatidylcholine	C078632		PPARG	5468	Homo sapiens	9606	[2-chloro-5-nitrobenzanilide results in decreased activity of PPARG protein] inhibits the reaction [Amiodarone results in increased uptake of 1-acyl-2-(12-((7-nitrobenz-2-oxa-1,3-diazol-4-yl)amino)dodecanoyl)phosphatidylcholine]	decreases^activity|decreases^reaction|increases^uptake	21123845
1-acyl-2-(12-((7-nitrobenz-2-oxa-1,3-diazol-4-yl)amino)dodecanoyl)phosphatidylcholine	C078632		SCD	6319	Homo sapiens	9606	SCD protein affects the reaction [Amiodarone results in increased uptake of 1-acyl-2-(12-((7-nitrobenz-2-oxa-1,3-diazol-4-yl)amino)dodecanoyl)phosphatidylcholine]	affects^reaction|increases^uptake	21123845
1 alpha,24-dihydroxyvitamin D3	C023850	60965-80-2	VDR	7421	Homo sapiens	9606	1 alpha,24-dihydroxyvitamin D3 binds to VDR protein	affects^binding	10927029
1 alpha-hydroxyergocalciferol	C042533	54573-75-0	CYP3A4	1576	Homo sapiens	9606	CYP3A4 protein results in increased hydroxylation of 1 alpha-hydroxyergocalciferol	increases^hydroxylation	15005856
1-aminobenzotriazole	C033020	1614-12-6	CYP1A2	1544	Homo sapiens	9606	1-aminobenzotriazole results in decreased activity of CYP1A2 protein	decreases^activity	15618748
1-aminobenzotriazole	C033020	1614-12-6	CYP2C9	1559	Homo sapiens	9606	1-aminobenzotriazole inhibits the reaction [CYP2C9 protein results in increased hydroxylation of Diclofenac]	decreases^reaction|increases^hydroxylation	15618748
1-aminobenzotriazole	C033020	1614-12-6	CYP2D6	1565	Homo sapiens	9606	1-aminobenzotriazole inhibits the reaction [CYP2D6 protein results in increased hydroxylation of bufuralol]	decreases^reaction|increases^hydroxylation	15618748
1-aminobenzotriazole	C033020	1614-12-6	CYP2E1	1571	Homo sapiens	9606	1-aminobenzotriazole results in decreased activity of CYP2E1 protein	decreases^activity	15618748
1-aminobenzotriazole	C033020	1614-12-6	HMOX1	3162	Homo sapiens	9606	1-aminobenzotriazole inhibits the reaction [[Acetaminophen co-treated with Buthionine Sulfoximine] results in increased expression of HMOX1 mRNA]	affects^cotreatment|decreases^reaction|increases^expression	18227147
1-aminocyclopropanol	C014318	54376-44-2	ALDH2	217	Homo sapiens	9606	[1-aminocyclopropanol analog results in decreased activity of ALDH2 protein] which results in decreased metabolism of Nitroglycerin	decreases^activity|decreases^metabolic processing	18272654
1-aminopyrene	C004482	1606-67-3	CCL5	6352	Homo sapiens	9606	1-aminopyrene results in increased expression of CCL5 mRNA	increases^expression	19879285
1-aminopyrene	C004482	1606-67-3	CYP1A2	1544	Homo sapiens	9606	CYP1A2 protein results in increased activity of 1-aminopyrene	increases^activity	15728263
1-aminopyrene	C004482	1606-67-3	CYP1B1	1545	Homo sapiens	9606	1-aminopyrene results in increased expression of CYP1B1 mRNA	increases^expression	12107646
1-aminopyrene	C004482	1606-67-3	IL5	3567	Homo sapiens	9606	1-aminopyrene results in increased secretion of IL5 protein	increases^secretion	19879285
1-aminopyrene	C004482	1606-67-3	IL8	3576	Homo sapiens	9606	1-aminopyrene results in increased secretion of IL8 protein	increases^secretion	19879285
1-anilino-8-naphthalenesulfonate	C027132	82-76-8	AMBP	259	Homo sapiens	9606	1-anilino-8-naphthalenesulfonate binds to AMBP protein	affects^binding	16461020
1-anilino-8-naphthalenesulfonate	C027132	82-76-8	APOD	347	Homo sapiens	9606	1-anilino-8-naphthalenesulfonate binds to APOD protein	affects^binding	16461020
1-anilino-8-naphthalenesulfonate	C027132	82-76-8	C8G	733	Homo sapiens	9606	1-anilino-8-naphthalenesulfonate binds to C8G protein	affects^binding	16461020
1-anilino-8-naphthalenesulfonate	C027132	82-76-8	GSTA1	2938	Homo sapiens	9606	1-anilino-8-naphthalenesulfonate binds to GSTA1 protein	affects^binding	14690442
1-anilino-8-naphthalenesulfonate	C027132	82-76-8	LCN1	3933	Homo sapiens	9606	1-anilino-8-naphthalenesulfonate binds to LCN1 protein	affects^binding	16461020
1-anilino-8-naphthalenesulfonate	C027132	82-76-8	LCN2	3934	Homo sapiens	9606	1-anilino-8-naphthalenesulfonate binds to LCN2 protein	affects^binding	16461020
1-anilino-8-naphthalenesulfonate	C027132	82-76-8	OBP2A	29991	Homo sapiens	9606	1-anilino-8-naphthalenesulfonate binds to OBP2A protein	affects^binding	16461020
1-anilino-8-naphthalenesulfonate	C027132	82-76-8	ORM1	5004	Homo sapiens	9606	1-anilino-8-naphthalenesulfonate binds to ORM1 protein	affects^binding	16461020
1-anilino-8-naphthalenesulfonate	C027132	82-76-8	PAEP	5047	Homo sapiens	9606	1-anilino-8-naphthalenesulfonate binds to PAEP protein	affects^binding	16461020
1-anilino-8-naphthalenesulfonate	C027132	82-76-8	PTGDS	5730	Homo sapiens	9606	1-anilino-8-naphthalenesulfonate binds to PTGDS protein	affects^binding	16461020
1-bromopropane	C118559	106-94-5	BCL2L1	598	Homo sapiens	9606	1-bromopropane results in decreased expression of BCL2L1 mRNA	decreases^expression	16815550
1-bromopropane	C118559	106-94-5	BDNF	627	Homo sapiens	9606	1-bromopropane inhibits the reaction [Bucladesine results in increased expression of BDNF mRNA]	decreases^reaction|increases^expression	19189864
1-bromopropane	C118559	106-94-5	CREB1	1385	Homo sapiens	9606	1-bromopropane results in decreased phosphorylation of and results in decreased activity of CREB1 protein	decreases^activity|decreases^phosphorylation	19189864
1-bromopropane	C118559	106-94-5	IL1B	3553	Homo sapiens	9606	1-bromopropane inhibits the reaction [IL1B protein results in increased activity of [NFKB1 protein binds to RELA protein]]	affects^binding|decreases^reaction|increases^activity	16815550
1-bromopropane	C118559	106-94-5	NFKB1	4790	Homo sapiens	9606	1-bromopropane inhibits the reaction [IL1B protein results in increased activity of [NFKB1 protein binds to RELA protein]]	affects^binding|decreases^reaction|increases^activity	16815550
1-bromopropane	C118559	106-94-5	NFKBIA	4792	Homo sapiens	9606	1-bromopropane inhibits the reaction [IL1B protein results in increased degradation of NFKBIA protein]	decreases^reaction|increases^degradation	16815550
1-bromopropane	C118559	106-94-5	RELA	5970	Homo sapiens	9606	1-bromopropane inhibits the reaction [IL1B protein results in increased activity of [NFKB1 protein binds to RELA protein]]	affects^binding|decreases^reaction|increases^activity	16815550
1-(carboxymethylthio)tetradecane	C062078	2921-20-2	PPARB	100136658	Homo sapiens	9606	1-(carboxymethylthio)tetradecane binds to and results in increased activity of PPARB protein	affects^binding|increases^activity	16731579
1-carboxysalsolinol	C048152	57256-34-5	COMT	1312	Homo sapiens	9606	COMT protein results in increased methylation of 1-carboxysalsolinol	increases^methylation	11160877
1-chloronaphthalene	C031337	90-13-1	CYP1A2	1544	Homo sapiens	9606	1-chloronaphthalene results in decreased activity of CYP1A2 protein	decreases^activity	15916432
1-chlorosucrose	C039463	64644-62-8	TAS1R2	80834	Homo sapiens	9606	1-chlorosucrose results in increased activity of [TAS1R2 protein binds to TAS1R3 protein]	affects^binding|increases^activity	20173092
1-chlorosucrose	C039463	64644-62-8	TAS1R3	83756	Homo sapiens	9606	1-chlorosucrose results in increased activity of [TAS1R2 protein binds to TAS1R3 protein]	affects^binding|increases^activity	20173092
1-ethyl-2-benzimidazolinone	C102635	10045-45-1	LYZ	4069	Homo sapiens	9606	1-ethyl-2-benzimidazolinone affects the secretion of LYZ protein	affects^secretion	15234967
1H-(1,2,4)oxadiazolo(4,3-a)quinoxalin-1-one	C095284		APP	351	Homo sapiens	9606	1H-(1,2,4)oxadiazolo(4,3-a)quinoxalin-1-one inhibits the reaction [Ginkgo biloba extract 761 inhibits the reaction [APP protein results in decreased phosphorylation of CREB1 protein]]	decreases^phosphorylation|decreases^reaction	18001288
1H-(1,2,4)oxadiazolo(4,3-a)quinoxalin-1-one	C095284		BAX	581	Homo sapiens	9606	1H-(1,2,4)oxadiazolo(4,3-a)quinoxalin-1-one results in increased expression of BAX protein	increases^expression	16288207
1H-(1,2,4)oxadiazolo(4,3-a)quinoxalin-1-one	C095284		CASP3	836	Homo sapiens	9606	1H-(1,2,4)oxadiazolo(4,3-a)quinoxalin-1-one results in increased activity of CASP3 protein	increases^activity	16288207
1H-(1,2,4)oxadiazolo(4,3-a)quinoxalin-1-one	C095284		CDKN1A	1026	Homo sapiens	9606	1H-(1,2,4)oxadiazolo(4,3-a)quinoxalin-1-one results in increased expression of CDKN1A protein	increases^expression	16288207
1H-(1,2,4)oxadiazolo(4,3-a)quinoxalin-1-one	C095284		CREB1	1385	Homo sapiens	9606	1H-(1,2,4)oxadiazolo(4,3-a)quinoxalin-1-one inhibits the reaction [Ginkgo biloba extract 761 inhibits the reaction [APP protein results in decreased phosphorylation of CREB1 protein]]	decreases^phosphorylation|decreases^reaction	18001288
1H-(1,2,4)oxadiazolo(4,3-a)quinoxalin-1-one	C095284		GUCY1A3	2982	Homo sapiens	9606	1H-(1,2,4)oxadiazolo(4,3-a)quinoxalin-1-one affects the folding of [Nitric Oxide binds to [GUCY1A3 protein binds to GUCY1B3 protein]]	affects^binding|affects^folding	11744065
1H-(1,2,4)oxadiazolo(4,3-a)quinoxalin-1-one	C095284		GUCY1B3	2983	Homo sapiens	9606	1H-(1,2,4)oxadiazolo(4,3-a)quinoxalin-1-one affects the folding of [Nitric Oxide binds to [GUCY1A3 protein binds to GUCY1B3 protein]]	affects^binding|affects^folding	11744065
1H-(1,2,4)oxadiazolo(4,3-a)quinoxalin-1-one	C095284		MDM2	4193	Homo sapiens	9606	1H-(1,2,4)oxadiazolo(4,3-a)quinoxalin-1-one results in increased expression of MDM2 protein	increases^expression	16288207
1H-(1,2,4)oxadiazolo(4,3-a)quinoxalin-1-one	C095284		TP53	7157	Homo sapiens	9606	1H-(1,2,4)oxadiazolo(4,3-a)quinoxalin-1-one results in increased stability of and results in increased expression of and results in increased phosphorylation of TP53 protein	increases^expression|increases^phosphorylation|increases^stability	16288207
1H-(1,2,4)oxadiazolo(4,3-a)quinoxalin-1-one	C095284		VASP	7408	Homo sapiens	9606	1H-(1,2,4)oxadiazolo(4,3-a)quinoxalin-1-one inhibits the reaction [Nitroglycerin results in increased phosphorylation of VASP protein]	decreases^reaction|increases^phosphorylation	17868048
1H-(1,2,4)oxadiazolo(4,3-a)quinoxalin-1-one	C095284		XIAP	331	Homo sapiens	9606	XIAP protein results in decreased activity of 1H-(1,2,4)oxadiazolo(4,3-a)quinoxalin-1-one	decreases^activity	16288207
1H,1H,2H,2H-perfluorodecanol	C033729	678-39-7	ERBB2	2064	Homo sapiens	9606	1H,1H,2H,2H-perfluorodecanol results in decreased expression of ERBB2 mRNA	decreases^expression	16393665
1H,1H,2H,2H-perfluorodecanol	C033729	678-39-7	ESR1	2099	Homo sapiens	9606	1H,1H,2H,2H-perfluorodecanol promotes the reaction [ESR1 protein binds to NCOA2 protein]	affects^binding|increases^reaction	17603182
1H,1H,2H,2H-perfluorodecanol	C033729	678-39-7	ESR2	2100	Homo sapiens	9606	1H,1H,2H,2H-perfluorodecanol promotes the reaction [ESR2 protein binds to NCOA2 protein]	affects^binding|increases^reaction	17603182
1H,1H,2H,2H-perfluorodecanol	C033729	678-39-7	NCOA2	10499	Homo sapiens	9606	1H,1H,2H,2H-perfluorodecanol promotes the reaction [ESR1 protein binds to NCOA2 protein]	affects^binding|increases^reaction	17603182
1H,1H,2H,2H-perfluorodecanol	C033729	678-39-7	PDZK1	5174	Homo sapiens	9606	1H,1H,2H,2H-perfluorodecanol results in increased expression of PDZK1 mRNA	increases^expression	16393665
1H,1H,2H,2H-perfluorodecanol	C033729	678-39-7	PGR	5241	Homo sapiens	9606	1H,1H,2H,2H-perfluorodecanol results in increased expression of PGR mRNA	increases^expression	16393665
1H,1H,2H,2H-perfluorodecanol	C033729	678-39-7	TFF1	7031	Homo sapiens	9606	1H,1H,2H,2H-perfluorodecanol results in increased expression of TFF1 mRNA	increases^expression	16393665
1H,1H,2H,2H-perfluorooctan-1-ol	C508406		ERBB2	2064	Homo sapiens	9606	1H,1H,2H,2H-perfluorooctan-1-ol results in decreased expression of ERBB2 mRNA	decreases^expression	16393665
1H,1H,2H,2H-perfluorooctan-1-ol	C508406		ESR1	2099	Homo sapiens	9606	1H,1H,2H,2H-perfluorooctan-1-ol promotes the reaction [ESR1 protein binds to NCOA2 protein]	affects^binding|increases^reaction	17603182
1H,1H,2H,2H-perfluorooctan-1-ol	C508406		ESR2	2100	Homo sapiens	9606	1H,1H,2H,2H-perfluorooctan-1-ol promotes the reaction [ESR2 protein binds to NCOA2 protein]	affects^binding|increases^reaction	17603182
1H,1H,2H,2H-perfluorooctan-1-ol	C508406		NCOA2	10499	Homo sapiens	9606	1H,1H,2H,2H-perfluorooctan-1-ol promotes the reaction [ESR1 protein binds to NCOA2 protein]	affects^binding|increases^reaction	17603182
1H,1H,2H,2H-perfluorooctan-1-ol	C508406		PDZK1	5174	Homo sapiens	9606	1H,1H,2H,2H-perfluorooctan-1-ol results in increased expression of PDZK1 mRNA	increases^expression	16393665
1H,1H,2H,2H-perfluorooctan-1-ol	C508406		PGR	5241	Homo sapiens	9606	1H,1H,2H,2H-perfluorooctan-1-ol results in increased expression of PGR mRNA	increases^expression	16393665
1H,1H,2H,2H-perfluorooctan-1-ol	C508406		TFF1	7031	Homo sapiens	9606	1H,1H,2H,2H-perfluorooctan-1-ol results in increased expression of TFF1 mRNA	increases^expression	16393665
1H-benzotriazole-5-carboxylic acid	C062152	23814-12-2	HCAR3	8843	Homo sapiens	9606	1H-benzotriazole-5-carboxylic acid analog binds to and results in increased activity of HCAR3 protein	affects^binding|increases^activity	20380810
1-hydroxy-1-hydroperoxynonane	C405904		CEBPB	1051	Homo sapiens	9606	1-hydroxy-1-hydroperoxynonane results in increased activity of CEBPB protein	increases^activity	17366569
1-hydroxy-1-hydroperoxynonane	C405904		IL8	3576	Homo sapiens	9606	1-hydroxy-1-hydroperoxynonane results in increased expression of IL8 mRNA	increases^expression	17366569
1-hydroxy-2-oxo-3,3-bis(2-aminoethyl)-1-triazene	C105351		CCL3	6348	Homo sapiens	9606	1-hydroxy-2-oxo-3,3-bis(2-aminoethyl)-1-triazene results in increased expression of CCL3 protein	increases^expression	10540334
1-hydroxy-2-oxo-3,3-bis(2-aminoethyl)-1-triazene	C105351		IL8	3576	Homo sapiens	9606	1-hydroxy-2-oxo-3,3-bis(2-aminoethyl)-1-triazene results in increased expression of IL8 mRNA	increases^expression	10540334
1-hydroxybenzo(a)pyrene	C032136	13345-23-8	UGT2A1	10941	Homo sapiens	9606	UGT2A1 protein results in increased glucuronidation of 1-hydroxybenzo(a)pyrene	increases^glucuronidation	21164388
1-hydroxycholecalciferol	C008088	41294-56-8	CYP3A4	1576	Homo sapiens	9606	CYP3A4 protein results in increased hydroxylation of 1-hydroxycholecalciferol	increases^hydroxylation	15005856
1'-hydroxyestragole	C014037	51410-44-7	HSD17B2	3294	Homo sapiens	9606	HSD17B2 protein results in increased oxidation of 1'-hydroxyestragole	increases^oxidation	19920071
1-hydroxymethylmidazolam	C040081	59468-90-5	CYP3A	1574	Homo sapiens	9606	CYP3A protein results in increased chemical synthesis of 1-hydroxymethylmidazolam	increases^chemical synthesis	15155557
1-hydroxymethylmidazolam	C040081	59468-90-5	CYP3A4	1576	Homo sapiens	9606	CYP3A4 protein results in increased chemical synthesis of 1-hydroxymethylmidazolam	increases^chemical synthesis	12401345
1-hydroxypyrene	C033146	5315-79-7	PGR	5241	Homo sapiens	9606	1-hydroxypyrene inhibits the reaction [Progesterone binds to PGR protein]	affects^binding|decreases^reaction	9144411
1-hydroxypyrene	C033146	5315-79-7	SULT1A1	6817	Homo sapiens	9606	1-hydroxypyrene results in decreased activity of SULT1A1 protein	decreases^activity	14570759
1-hydroxypyrene	C033146	5315-79-7	SULT1A3	6818	Homo sapiens	9606	1-hydroxypyrene results in decreased activity of SULT1A3 protein	decreases^activity	14570759
1-hydroxypyrene	C033146	5315-79-7	SULT1E1	6783	Homo sapiens	9606	1-hydroxypyrene results in decreased activity of SULT1E1 protein	decreases^activity	14570759
1-hydroxypyrene	C033146	5315-79-7	SULT2A1	6822	Homo sapiens	9606	Dimethylformamide inhibits the reaction [SULT2A1 protein results in increased sulfation of 1-hydroxypyrene]	decreases^reaction|increases^sulfation	14570759
1-hydroxypyrene	C033146	5315-79-7	UGT1A1	54658	Homo sapiens	9606	UGT1A1 protein results in increased glucuronidation of 1-hydroxypyrene	increases^glucuronidation	15802387
1-hydroxypyrene	C033146	5315-79-7	UGT1A10	54575	Homo sapiens	9606	UGT1A10 protein results in increased glucuronidation of 1-hydroxypyrene	increases^glucuronidation	15802387
1-hydroxypyrene	C033146	5315-79-7	UGT1A3	54659	Homo sapiens	9606	UGT1A3 protein results in increased glucuronidation of 1-hydroxypyrene	increases^glucuronidation	15802387
1-hydroxypyrene	C033146	5315-79-7	UGT1A4	54657	Homo sapiens	9606	UGT1A4 protein results in increased glucuronidation of 1-hydroxypyrene	increases^glucuronidation	15802387
1-hydroxypyrene	C033146	5315-79-7	UGT1A6	54578	Homo sapiens	9606	UGT1A6 protein results in increased glucuronidation of 1-hydroxypyrene	increases^glucuronidation	15802387
1-hydroxypyrene	C033146	5315-79-7	UGT1A7	54577	Homo sapiens	9606	UGT1A7 protein results in increased glucuronidation of 1-hydroxypyrene	increases^glucuronidation	15802387
1-hydroxypyrene	C033146	5315-79-7	UGT1A8	54576	Homo sapiens	9606	UGT1A8 protein results in increased glucuronidation of 1-hydroxypyrene	increases^glucuronidation	15802387
1-hydroxypyrene	C033146	5315-79-7	UGT1A9	54600	Homo sapiens	9606	UGT1A9 protein results in increased glucuronidation of 1-hydroxypyrene	increases^glucuronidation	15802387
1-hydroxypyrene	C033146	5315-79-7	UGT2A1	10941	Homo sapiens	9606	UGT2A1 protein results in increased glucuronidation of 1-hydroxypyrene	increases^glucuronidation	21164388
1-indanol	C016515	6351-10-06	AKR1C4	1109	Homo sapiens	9606	AKR1C4 protein results in increased oxidation of 1-indanol	increases^oxidation	8543560
1L-6-hydroxymethyl-chiro-inositol 2(R)-2-O-methyl-3-O-octadecylcarbonate	C477931		BAD	572	Homo sapiens	9606	1L-6-hydroxymethyl-chiro-inositol 2(R)-2-O-methyl-3-O-octadecylcarbonate results in decreased phosphorylation of BAD protein	decreases^phosphorylation	12970779
1L-6-hydroxymethyl-chiro-inositol 2(R)-2-O-methyl-3-O-octadecylcarbonate	C477931		BIRC2	329	Homo sapiens	9606	1L-6-hydroxymethyl-chiro-inositol 2(R)-2-O-methyl-3-O-octadecylcarbonate results in decreased expression of BIRC2 protein	decreases^expression	12970779
1L-6-hydroxymethyl-chiro-inositol 2(R)-2-O-methyl-3-O-octadecylcarbonate	C477931		BIRC3	330	Homo sapiens	9606	1L-6-hydroxymethyl-chiro-inositol 2(R)-2-O-methyl-3-O-octadecylcarbonate results in decreased expression of BIRC3 protein	decreases^expression	12970779
1L-6-hydroxymethyl-chiro-inositol 2(R)-2-O-methyl-3-O-octadecylcarbonate	C477931		CFLAR	8837	Homo sapiens	9606	1L-6-hydroxymethyl-chiro-inositol 2(R)-2-O-methyl-3-O-octadecylcarbonate results in decreased expression of CFLAR protein	decreases^expression	12970779
1L-6-hydroxymethyl-chiro-inositol 2(R)-2-O-methyl-3-O-octadecylcarbonate	C477931		INS	3630	Homo sapiens	9606	1L-6-hydroxymethyl-chiro-inositol 2(R)-2-O-methyl-3-O-octadecylcarbonate inhibits the reaction [INS protein results in decreased susceptibility to Coumaric Acids]	decreases^reaction|decreases^response to substance	20015842
1L-6-hydroxymethyl-chiro-inositol 2(R)-2-O-methyl-3-O-octadecylcarbonate	C477931		MT1A	4489	Homo sapiens	9606	1L-6-hydroxymethyl-chiro-inositol 2(R)-2-O-methyl-3-O-octadecylcarbonate promotes the reaction [Zinc results in increased expression of MT1A mRNA]	increases^expression|increases^reaction	17363595
1L-6-hydroxymethyl-chiro-inositol 2(R)-2-O-methyl-3-O-octadecylcarbonate	C477931		STS	412	Homo sapiens	9606	1L-6-hydroxymethyl-chiro-inositol 2(R)-2-O-methyl-3-O-octadecylcarbonate inhibits the reaction [Tretinoin results in increased activity of STS protein]	decreases^reaction|increases^activity	16178010
1-menaphthyl sulfate	C008348	26489-16-7	GSTT2	2953	Homo sapiens	9606	GSTT2 protein affects the metabolism of 1-menaphthyl sulfate	affects^metabolic processing	9037717
1-(methylimino-N-oxy)-6-(2-morpholinoethoxy)-3-phenyl-1H-indene-2-carboxylic acid ethyl ester	C513115		BAX	581	Homo sapiens	9606	1-(methylimino-N-oxy)-6-(2-morpholinoethoxy)-3-phenyl-1H-indene-2-carboxylic acid ethyl ester results in increased expression of BAX protein	increases^expression	16806087
1-(methylimino-N-oxy)-6-(2-morpholinoethoxy)-3-phenyl-1H-indene-2-carboxylic acid ethyl ester	C513115		BCL2	596	Homo sapiens	9606	1-(methylimino-N-oxy)-6-(2-morpholinoethoxy)-3-phenyl-1H-indene-2-carboxylic acid ethyl ester results in decreased expression of BCL2 protein	decreases^expression	16806087
1-(methylimino-N-oxy)-6-(2-morpholinoethoxy)-3-phenyl-1H-indene-2-carboxylic acid ethyl ester	C513115		PTEN	5728	Homo sapiens	9606	1-(methylimino-N-oxy)-6-(2-morpholinoethoxy)-3-phenyl-1H-indene-2-carboxylic acid ethyl ester results in increased expression of PTEN protein	increases^expression	16806087
1-methylnaphthalene	C025968	90-12-0	CYP1A2	1544	Homo sapiens	9606	1-methylnaphthalene results in decreased activity of CYP1A2 protein	decreases^activity	15916432
1-methylxanthine	C053085	6136-37-4	CYP1A2	1544	Homo sapiens	9606	1-methylxanthine results in decreased activity of CYP1A2 protein	decreases^activity	11465391
1-(N-(3-ammoniopropyl)-N-(n-propyl)amino)diazen-1-ium-1,2-diolate	C111679		CASP3	836	Homo sapiens	9606	1-(N-(3-ammoniopropyl)-N-(n-propyl)amino)diazen-1-ium-1,2-diolate results in decreased activity of CASP3 protein	decreases^activity	9441900
1-naphthol	C029350	90-15-3	CYP1A1	1543	Homo sapiens	9606	CYP1A1 protein results in increased abundance of 1-naphthol	increases^abundance	16243959
1-naphthol	C029350	90-15-3	CYP1A2	1544	Homo sapiens	9606	1-naphthol results in decreased activity of CYP1A2 protein	decreases^activity	15916432
1-naphthol	C029350	90-15-3	CYP1B1	1545	Homo sapiens	9606	CYP1B1 protein results in increased abundance of 1-naphthol	increases^abundance	16243959
1-naphthol	C029350	90-15-3	CYP2A6	1548	Homo sapiens	9606	CYP2A6 protein results in increased abundance of 1-naphthol	increases^abundance	16243959
1-naphthol	C029350	90-15-3	CYP2B6	1555	Homo sapiens	9606	CYP2B6 protein results in increased abundance of 1-naphthol	increases^abundance	16243959
1-naphthol	C029350	90-15-3	CYP2C19	1557	Homo sapiens	9606	CYP2C19 protein results in increased abundance of 1-naphthol	increases^abundance	16243959
1-naphthol	C029350	90-15-3	CYP2C8	1558	Homo sapiens	9606	CYP2C8 protein results in increased abundance of 1-naphthol	increases^abundance	16243959
1-naphthol	C029350	90-15-3	CYP2C9	1559	Homo sapiens	9606	CYP2C9 protein results in increased abundance of 1-naphthol	increases^abundance	16243959
1-naphthol	C029350	90-15-3	CYP2D6	1565	Homo sapiens	9606	CYP2D6 protein results in increased abundance of 1-naphthol	increases^abundance	16243959
1-naphthol	C029350	90-15-3	CYP2E1	1571	Homo sapiens	9606	CYP2E1 protein results in increased abundance of 1-naphthol	increases^abundance	16243959
1-naphthol	C029350	90-15-3	CYP3A4	1576	Homo sapiens	9606	CYP3A4 protein results in increased abundance of 1-naphthol	increases^abundance	16243959
1-naphthol	C029350	90-15-3	CYP3A5	1577	Homo sapiens	9606	CYP3A5 protein results in increased abundance of 1-naphthol	increases^abundance	16243959
1-naphthol	C029350	90-15-3	CYP3A7	1551	Homo sapiens	9606	CYP3A7 protein results in increased abundance of 1-naphthol	increases^abundance	16243959
1-naphthol	C029350	90-15-3	SULT1A1	6817	Homo sapiens	9606	SULT1A1 protein results in increased sulfation of 1-naphthol	increases^sulfation	15684482
1-naphthol	C029350	90-15-3	SULT1A3	6818	Homo sapiens	9606	SULT1A3 protein results in increased sulfation of 1-naphthol	increases^sulfation	15684482
1-naphthol	C029350	90-15-3	THRB	7068	Homo sapiens	9606	1-naphthol binds to and results in decreased activity of THRB protein	affects^binding|decreases^activity	18584933
1-naphthol	C029350	90-15-3	UGT1A6	54578	Homo sapiens	9606	UGT1A6 protein results in increased glucuronidation of 1-naphthol	increases^glucuronidation	12756209
1-naphthol	C029350	90-15-3	UGT1A9	54600	Homo sapiens	9606	UGT1A9 protein results in increased glucuronidation of 1-naphthol	increases^glucuronidation	18816295|15044611
1-naphthol	C029350	90-15-3	UGT2A1	10941	Homo sapiens	9606	UGT2A1 protein results in increased glucuronidation of 1-naphthol	increases^glucuronidation	21164388
1-naphthol	C029350	90-15-3	UGT2B11	10720	Homo sapiens	9606	UGT2B11 protein results in increased glucuronidation of 1-naphthol	increases^glucuronidation	8333863
1-nitropyrene	C032668	5522-43-0	CCL20	6364	Homo sapiens	9606	1-nitropyrene results in increased expression of CCL20 mRNA	increases^expression	19879285
1-nitropyrene	C032668	5522-43-0	CCL5	6352	Homo sapiens	9606	1-nitropyrene results in increased expression of CCL5 mRNA	increases^expression	19879285
1-nitropyrene	C032668	5522-43-0	CXCL1	2919	Homo sapiens	9606	1-nitropyrene results in increased expression of CXCL1 mRNA	increases^expression	19879285
1-nitropyrene	C032668	5522-43-0	CXCL10	3627	Homo sapiens	9606	1-nitropyrene results in increased expression of CXCL10 mRNA	increases^expression	19879285
1-nitropyrene	C032668	5522-43-0	CXCL11	6373	Homo sapiens	9606	1-nitropyrene results in increased expression of CXCL11 mRNA	increases^expression	19879285
1-nitropyrene	C032668	5522-43-0	CXCL3	2921	Homo sapiens	9606	1-nitropyrene results in increased expression of CXCL3 mRNA	increases^expression	19879285
1-nitropyrene	C032668	5522-43-0	CYP1A1	1543	Homo sapiens	9606	1-nitropyrene inhibits the reaction [Tetrachlorodibenzodioxin results in increased activity of CYP1A1 protein]	decreases^reaction|increases^activity	18493746
1-nitropyrene	C032668	5522-43-0	CYP1A2	1544	Homo sapiens	9606	1-nitropyrene inhibits the reaction [Tetrachlorodibenzodioxin results in increased activity of CYP1A2 protein]	decreases^reaction|increases^activity	18493746
1-nitropyrene	C032668	5522-43-0	IL6	3569	Homo sapiens	9606	1-nitropyrene results in increased expression of IL6 mRNA	increases^expression	19879285
1-nitropyrene	C032668	5522-43-0	IL8	3576	Homo sapiens	9606	1-nitropyrene results in increased expression of IL8 mRNA	increases^expression	12393170|19879285
1-nitropyrene	C032668	5522-43-0	LTB	4050	Homo sapiens	9606	1-nitropyrene results in increased expression of LTB mRNA	increases^expression	19879285
1-nitropyrene	C032668	5522-43-0	NFKB1	4790	Homo sapiens	9606	1-nitropyrene results in increased activity of NFKB1 protein	increases^activity	12393170
1-nitropyrene	C032668	5522-43-0	NFKBIA	4792	Homo sapiens	9606	NFKBIA protein inhibits the reaction [1-nitropyrene results in increased activity of NFKB1 protein]	decreases^reaction|increases^activity	12393170
1-nitropyrene	C032668	5522-43-0	RELA	5970	Homo sapiens	9606	1-nitropyrene results in increased activity of RELA protein	increases^activity	12393170
1-nitropyrene	C032668	5522-43-0	TNF	7124	Homo sapiens	9606	1-nitropyrene results in increased expression of TNF mRNA	increases^expression	19879285
1-O-hexyl-2,3,5-trimethylhydroquinone	C081906	148081-72-5	MPO	4353	Homo sapiens	9606	MPO protein results in increased oxidation of 1-O-hexyl-2,3,5-trimethylhydroquinone	increases^oxidation	10994872
1-oleoyl-2-acetoyl-sn-glycerol	C520323		ALOX5	240	Homo sapiens	9606	1-oleoyl-2-acetoyl-sn-glycerol inhibits the reaction [1-Butanol inhibits the reaction [Calcimycin results in increased activity of and results in increased localization of ALOX5 protein]]	decreases^reaction|increases^activity|increases^localization	18218859
1-oleoyl-2-acetoyl-sn-glycerol	C520323		F2RL1	2150	Homo sapiens	9606	F2RL1 protein affects the reaction [1-oleoyl-2-acetoyl-sn-glycerol results in increased transport of Barium]	affects^reaction|increases^transport	16123040
1-oleoyl-2-acetoyl-sn-glycerol	C520323		SCN5A	6331	Homo sapiens	9606	1-oleoyl-2-acetoyl-sn-glycerol results in decreased activity of SCN5A protein	decreases^activity	12796143
1-oleoyl-2-acetylglycerol	C038237	86390-77-4	ABCA1	19	Homo sapiens	9606	1-oleoyl-2-acetylglycerol inhibits the reaction [APOA1 protein affects the reaction [ABCA1 protein results in increased transport of Cholesterol]]	affects^reaction|decreases^reaction|increases^transport	16118212
1-oleoyl-2-acetylglycerol	C038237	86390-77-4	APOA1	335	Homo sapiens	9606	1-oleoyl-2-acetylglycerol inhibits the reaction [APOA1 protein affects the reaction [ABCA1 protein results in increased transport of Cholesterol]]	affects^reaction|decreases^reaction|increases^transport	16118212
1-oleoyl-2-acetylglycerol	C038237	86390-77-4	TRPC3	7222	Homo sapiens	9606	1-oleoyl-2-acetylglycerol affects the reaction [TRPC3 protein affects the transport of Calcium]	affects^reaction|affects^transport	17351372
1-oleoyl-2-acetylglycerol	C038237	86390-77-4	TRPC4	7223	Homo sapiens	9606	TRPC4 protein affects the reaction [1-oleoyl-2-acetylglycerol results in increased transport of Strontium]	affects^reaction|increases^transport	11830588
1-oleoyl-2-acetylglycerol	C038237	86390-77-4	TRPC5	7224	Homo sapiens	9606	1-oleoyl-2-acetylglycerol affects the reaction [TRPC5 protein affects the transport of Calcium]	affects^reaction|affects^transport	17351372
1-oleoyl-2-acetylglycerol	C038237	86390-77-4	TRPM6	140803	Homo sapiens	9606	Gadolinium inhibits the reaction [TRPM6 protein affects the reaction [1-oleoyl-2-acetylglycerol results in increased transport of Calcium]]	affects^reaction|decreases^reaction|increases^transport	11988098
1-palmitoyl-2-(5-oxovaleroyl)-sn-glycero-3-phosphorylcholine	C400184		AGTR1	185	Homo sapiens	9606	1-palmitoyl-2-(5-oxovaleroyl)-sn-glycero-3-phosphorylcholine results in increased expression of AGTR1 mRNA	increases^expression	16386258
1-palmitoyl-2-(5-oxovaleroyl)-sn-glycero-3-phosphorylcholine	C400184		ALOX5	240	Homo sapiens	9606	1-palmitoyl-2-(5-oxovaleroyl)-sn-glycero-3-phosphorylcholine results in increased expression of ALOX5 mRNA	increases^expression	16386258
1-palmitoyl-2-(5-oxovaleroyl)-sn-glycero-3-phosphorylcholine	C400184		CCR2	729230	Homo sapiens	9606	1-palmitoyl-2-(5-oxovaleroyl)-sn-glycero-3-phosphorylcholine results in increased expression of CCR2 mRNA	increases^expression	16386258
1-palmitoyl-2-(5-oxovaleroyl)-sn-glycero-3-phosphorylcholine	C400184		CD68	968	Homo sapiens	9606	1-palmitoyl-2-(5-oxovaleroyl)-sn-glycero-3-phosphorylcholine results in increased expression of CD68 mRNA	increases^expression	16386258
1-palmitoyl-2-(5-oxovaleroyl)-sn-glycero-3-phosphorylcholine	C400184		CRP	1401	Homo sapiens	9606	1-palmitoyl-2-(5-oxovaleroyl)-sn-glycero-3-phosphorylcholine results in increased expression of CRP mRNA	increases^expression	16386258
1-palmitoyl-2-(5-oxovaleroyl)-sn-glycero-3-phosphorylcholine	C400184		IL1A	3552	Homo sapiens	9606	1-palmitoyl-2-(5-oxovaleroyl)-sn-glycero-3-phosphorylcholine results in increased expression of IL1A mRNA	increases^expression	16386258
1-palmitoyl-2-(5-oxovaleroyl)-sn-glycero-3-phosphorylcholine	C400184		IL1B	3553	Homo sapiens	9606	1-palmitoyl-2-(5-oxovaleroyl)-sn-glycero-3-phosphorylcholine results in increased expression of IL1B mRNA	increases^expression	16386258
1-palmitoyl-2-(5-oxovaleroyl)-sn-glycero-3-phosphorylcholine	C400184		IL8	3576	Homo sapiens	9606	1-palmitoyl-2-(5-oxovaleroyl)-sn-glycero-3-phosphorylcholine results in increased expression of IL8 mRNA	increases^expression	16386258
1-palmitoyl-2-(5-oxovaleroyl)-sn-glycero-3-phosphorylcholine	C400184		OLR1	4973	Homo sapiens	9606	1-palmitoyl-2-(5-oxovaleroyl)-sn-glycero-3-phosphorylcholine results in increased expression of OLR1 mRNA	increases^expression	16386258
1-palmitoyl-2-(5-oxovaleroyl)-sn-glycero-3-phosphorylcholine	C400184		PTAFR	5724	Homo sapiens	9606	1-palmitoyl-2-(5-oxovaleroyl)-sn-glycero-3-phosphorylcholine binds to PTAFR protein	affects^binding	16386258
1-palmitoyl-2-(5-oxovaleroyl)-sn-glycero-3-phosphorylcholine	C400184		PTGS1	5742	Homo sapiens	9606	1-palmitoyl-2-(5-oxovaleroyl)-sn-glycero-3-phosphorylcholine results in increased expression of PTGS1 mRNA	increases^expression	16386258
1-palmitoyl-2-(5-oxovaleroyl)-sn-glycero-3-phosphorylcholine	C400184		PTGS2	5743	Homo sapiens	9606	1-palmitoyl-2-(5-oxovaleroyl)-sn-glycero-3-phosphorylcholine results in increased expression of PTGS2 mRNA	increases^expression	16386258
1-palmitoyl-2-(5-oxovaleroyl)-sn-glycero-3-phosphorylcholine	C400184		SELE	6401	Homo sapiens	9606	1-palmitoyl-2-(5-oxovaleroyl)-sn-glycero-3-phosphorylcholine results in increased expression of SELE mRNA	increases^expression	16386258
1-palmitoyl-2-(5-oxovaleroyl)-sn-glycero-3-phosphorylcholine	C400184		TIMP4	7079	Homo sapiens	9606	1-palmitoyl-2-(5-oxovaleroyl)-sn-glycero-3-phosphorylcholine results in increased expression of TIMP4 mRNA	increases^expression	16386258
1-palmitoyl-2-(5-oxovaleroyl)-sn-glycero-3-phosphorylcholine	C400184		TNF	7124	Homo sapiens	9606	1-palmitoyl-2-(5-oxovaleroyl)-sn-glycero-3-phosphorylcholine results in increased expression of TNF mRNA	increases^expression	16386258
1-palmitoyl-2-arachidonyl-3-phosphorylcholine	C468114		AKT1	207	Homo sapiens	9606	1-palmitoyl-2-arachidonyl-3-phosphorylcholine affects the localization of AKT1 protein	affects^localization	15472119
1-palmitoyl-2-arachidonyl-3-phosphorylcholine	C468114		CDC42	998	Homo sapiens	9606	1-palmitoyl-2-arachidonyl-3-phosphorylcholine affects the localization of CDC42 protein	affects^localization	15472119
1-palmitoyl-2-arachidonyl-3-phosphorylcholine	C468114		PAK1	5058	Homo sapiens	9606	1-palmitoyl-2-arachidonyl-3-phosphorylcholine affects the localization of PAK1 protein	affects^localization	15472119
1-phenyl-1,2-propanedione	C100349	579-07-7	DHRS2	10202	Homo sapiens	9606	[NADP co-treated with DHRS2 protein] affects the metabolism of 1-phenyl-1,2-propanedione	affects^cotreatment|affects^metabolic processing	16685466
1-phenyl-2-hexadecanoylamino-3-pyrrolidino-1-propanol	C110417		CDKN1A	1026	Homo sapiens	9606	1-phenyl-2-hexadecanoylamino-3-pyrrolidino-1-propanol inhibits the reaction [Doxorubicin results in increased expression of CDKN1A protein]	decreases^reaction|increases^expression	15781256
1-phenylazo-2-naphthol	C024336	842-07-9	CYB5A	1528	Homo sapiens	9606	CYB5A protein inhibits the reaction [CYP2B6 protein results in increased oxidation of 1-phenylazo-2-naphthol]	decreases^reaction|increases^oxidation	17159775
1-phenylazo-2-naphthol	C024336	842-07-9	CYP1A1	1543	Homo sapiens	9606	CYB5A protein promotes the reaction [CYP1A1 protein results in increased oxidation of 1-phenylazo-2-naphthol]	increases^oxidation|increases^reaction	17159775
1-phenylazo-2-naphthol	C024336	842-07-9	CYP1A2	1544	Homo sapiens	9606	CYB5A protein promotes the reaction [CYP1A2 protein results in increased oxidation of 1-phenylazo-2-naphthol]	increases^oxidation|increases^reaction	17159775
1-phenylazo-2-naphthol	C024336	842-07-9	CYP1B1	1545	Homo sapiens	9606	CYP1B1 protein results in increased oxidation of 1-phenylazo-2-naphthol	increases^oxidation	17159775
1-phenylazo-2-naphthol	C024336	842-07-9	CYP2A6	1548	Homo sapiens	9606	CYB5A protein promotes the reaction [CYP2A6 protein results in increased oxidation of 1-phenylazo-2-naphthol]	increases^oxidation|increases^reaction	17159775
1-phenylazo-2-naphthol	C024336	842-07-9	CYP2B6	1555	Homo sapiens	9606	CYB5A protein inhibits the reaction [CYP2B6 protein results in increased oxidation of 1-phenylazo-2-naphthol]	decreases^reaction|increases^oxidation	17159775
1-phenylazo-2-naphthol	C024336	842-07-9	CYP2C19	1557	Homo sapiens	9606	CYB5A protein inhibits the reaction [CYP2C19 protein results in increased oxidation of 1-phenylazo-2-naphthol]	decreases^reaction|increases^oxidation	17159775
1-phenylazo-2-naphthol	C024336	842-07-9	CYP2C8	1558	Homo sapiens	9606	CYP2C8 protein results in increased oxidation of 1-phenylazo-2-naphthol	increases^oxidation	17159775
1-phenylazo-2-naphthol	C024336	842-07-9	CYP2C9	1559	Homo sapiens	9606	CYP2C9 protein results in increased oxidation of 1-phenylazo-2-naphthol	increases^oxidation	17159775
1-phenylazo-2-naphthol	C024336	842-07-9	CYP2D6	1565	Homo sapiens	9606	CYB5A protein inhibits the reaction [CYP2D6 protein results in increased oxidation of 1-phenylazo-2-naphthol]	decreases^reaction|increases^oxidation	17159775
1-phenylazo-2-naphthol	C024336	842-07-9	CYP2E1	1571	Homo sapiens	9606	CYP2E1 protein results in increased oxidation of 1-phenylazo-2-naphthol	increases^oxidation	17159775
1-phenylazo-2-naphthol	C024336	842-07-9	CYP3A4	1576	Homo sapiens	9606	CYB5A protein promotes the reaction [CYP3A4 protein results in increased oxidation of 1-phenylazo-2-naphthol]	increases^oxidation|increases^reaction	19358889|17159775
1-(propoxymethyl)maleimide	C557741		WRN	7486	Homo sapiens	9606	1-(propoxymethyl)maleimide results in decreased activity of WRN protein	decreases^activity	21220316
1-propyl-5-(3-p-tolylisoxazol-5-yl)-1,2,3,6-tetrahydropyridine	C107238		DRD1	1812	Homo sapiens	9606	1-propyl-5-(3-p-tolylisoxazol-5-yl)-1,2,3,6-tetrahydropyridine inhibits the reaction [Cocaine promotes the reaction [[SIGMAR1 protein binds to DRD1 protein] which results in increased phosphorylation of and results in increased activity of MAPK1 protein]]	affects^binding|decreases^reaction|increases^activity|increases^phosphorylation|increases^reaction	20956312
1-propyl-5-(3-p-tolylisoxazol-5-yl)-1,2,3,6-tetrahydropyridine	C107238		MAPK1	5594	Homo sapiens	9606	1-propyl-5-(3-p-tolylisoxazol-5-yl)-1,2,3,6-tetrahydropyridine inhibits the reaction [Cocaine promotes the reaction [[SIGMAR1 protein binds to DRD1 protein] which results in increased phosphorylation of and results in increased activity of MAPK1 protein]]	affects^binding|decreases^reaction|increases^activity|increases^phosphorylation|increases^reaction	20956312
1-propyl-5-(3-p-tolylisoxazol-5-yl)-1,2,3,6-tetrahydropyridine	C107238		MAPK3	5595	Homo sapiens	9606	1-propyl-5-(3-p-tolylisoxazol-5-yl)-1,2,3,6-tetrahydropyridine inhibits the reaction [Cocaine promotes the reaction [[SIGMAR1 protein binds to DRD1 protein] which results in increased phosphorylation of and results in increased activity of MAPK3 protein]]	affects^binding|decreases^reaction|increases^activity|increases^phosphorylation|increases^reaction	20956312
1-propyl-5-(3-p-tolylisoxazol-5-yl)-1,2,3,6-tetrahydropyridine	C107238		SIGMAR1	10280	Homo sapiens	9606	1-propyl-5-(3-p-tolylisoxazol-5-yl)-1,2,3,6-tetrahydropyridine binds to and results in decreased activity of SIGMAR1 protein	affects^binding|decreases^activity	20956312
1-pyrenebutanol	C463480		CYP3A4	1576	Homo sapiens	9606	1-pyrenebutanol binds to CYP3A4 protein	affects^binding	17198380
(1R-(exo,exo))-3-(4-fluorophenyl)-8-methyl-8- azabicyclo(3.2.1)octane-2-carboxylic acid, methyl ester	C021279	50370-56-4	SLC6A3	6531	Homo sapiens	9606	1-Methyl-4-phenylpyridinium inhibits the reaction [(1R-(exo,exo))-3-(4-fluorophenyl)-8-methyl-8- azabicyclo(3.2.1)octane-2-carboxylic acid, methyl ester binds to SLC6A3 protein]	affects^binding|decreases^reaction	17250655
1-stearoyl-2-arachidonoylglycerol	C075809	65914-84-3	DAGLA	747	Homo sapiens	9606	DAGLA protein results in increased metabolism of 1-stearoyl-2-arachidonoylglycerol	increases^metabolic processing	18657971
1-stearoyl-2-arachidonoylglycerol	C075809	65914-84-3	DAGLB	221955	Homo sapiens	9606	DAGLB protein results in increased metabolism of 1-stearoyl-2-arachidonoylglycerol	increases^metabolic processing	18657971
1-stearoyl-2-arachidonoylglycerol	C075809	65914-84-3	DGKE	8526	Homo sapiens	9606	DGKE protein results in increased phosphorylation of 1-stearoyl-2-arachidonoylglycerol	increases^phosphorylation	17455907
1-stearoyl-2-arachidonoylglycerol	C075809	65914-84-3	TRPM6	140803	Homo sapiens	9606	TRPM6 protein affects the reaction [1-stearoyl-2-arachidonoylglycerol results in increased transport of Barium]	affects^reaction|increases^transport	11988098
1-trichloromethyl-1,2,3,4-tetrahydro-beta-carboline	C067372	131384-80-0	BAX	581	Homo sapiens	9606	1-trichloromethyl-1,2,3,4-tetrahydro-beta-carboline results in increased expression of BAX mRNA	increases^expression	15447660
1-trichloromethyl-1,2,3,4-tetrahydro-beta-carboline	C067372	131384-80-0	BCL2L1	598	Homo sapiens	9606	1-trichloromethyl-1,2,3,4-tetrahydro-beta-carboline results in increased expression of BCL2L1 mRNA	increases^expression	15447660
1-trichloromethyl-1,2,3,4-tetrahydro-beta-carboline	C067372	131384-80-0	BID	637	Homo sapiens	9606	1-trichloromethyl-1,2,3,4-tetrahydro-beta-carboline results in increased expression of BID mRNA	increases^expression	15447660
1-trichloromethyl-1,2,3,4-tetrahydro-beta-carboline	C067372	131384-80-0	CASP3	836	Homo sapiens	9606	1-trichloromethyl-1,2,3,4-tetrahydro-beta-carboline results in increased activity of CASP3 protein	increases^activity	15447660
1-trichloromethyl-1,2,3,4-tetrahydro-beta-carboline	C067372	131384-80-0	CYCS	54205	Homo sapiens	9606	1-trichloromethyl-1,2,3,4-tetrahydro-beta-carboline affects the localization of CYCS protein	affects^localization	15447660
1-UFT protocol	C031903		ACAA1	30	Homo sapiens	9606	ACAA1 protein results in increased susceptibility to 1-UFT protocol	increases^response to substance	16734730
1-UFT protocol	C031903		AGA	175	Homo sapiens	9606	AGA protein results in decreased susceptibility to 1-UFT protocol	decreases^response to substance	16734730
1-UFT protocol	C031903		AGR2	10551	Homo sapiens	9606	AGR2 protein results in increased susceptibility to 1-UFT protocol	increases^response to substance	16734730
1-UFT protocol	C031903		AKR1B1	231	Homo sapiens	9606	AKR1B1 protein results in decreased susceptibility to 1-UFT protocol	decreases^response to substance	16734730
1-UFT protocol	C031903		AKR1C3	8644	Homo sapiens	9606	AKR1C3 protein results in increased susceptibility to 1-UFT protocol	increases^response to substance	16734730
1-UFT protocol	C031903		AXL	558	Homo sapiens	9606	AXL protein results in decreased susceptibility to 1-UFT protocol	decreases^response to substance	16734730
1-UFT protocol	C031903		CLDN3	1365	Homo sapiens	9606	CLDN3 protein results in increased susceptibility to 1-UFT protocol	increases^response to substance	16734730
1-UFT protocol	C031903		CYR61	3491	Homo sapiens	9606	CYR61 protein results in decreased susceptibility to 1-UFT protocol	decreases^response to substance	16734730
1-UFT protocol	C031903		DPYD	1806	Homo sapiens	9606	DPYD protein results in decreased susceptibility to 1-UFT protocol	decreases^response to substance	16734730
1-UFT protocol	C031903		DSE	29940	Homo sapiens	9606	DSE protein results in decreased susceptibility to 1-UFT protocol	decreases^response to substance	16734730
1-UFT protocol	C031903		EPS8	2059	Homo sapiens	9606	EPS8 protein results in increased susceptibility to 1-UFT protocol	increases^response to substance	16734730
1-UFT protocol	C031903		ERBB3	2065	Homo sapiens	9606	ERBB3 protein results in increased susceptibility to 1-UFT protocol	increases^response to substance	16734730
1-UFT protocol	C031903		FHL1	2273	Homo sapiens	9606	FHL1 protein results in decreased susceptibility to 1-UFT protocol	decreases^response to substance	16734730
1-UFT protocol	C031903		FUCA1	2517	Homo sapiens	9606	FUCA1 protein results in increased susceptibility to 1-UFT protocol	increases^response to substance	16734730
1-UFT protocol	C031903		GALNT2	2590	Homo sapiens	9606	GALNT2 protein results in decreased susceptibility to 1-UFT protocol	decreases^response to substance	16734730
1-UFT protocol	C031903		HDGFRP3	50810	Homo sapiens	9606	HDGFRP3 protein results in decreased susceptibility to 1-UFT protocol	decreases^response to substance	16734730
1-UFT protocol	C031903		HRAS	3265	Homo sapiens	9606	HRAS protein results in decreased susceptibility to 1-UFT protocol	decreases^response to substance	16734730
1-UFT protocol	C031903		HTATSF1	27336	Homo sapiens	9606	HTATSF1 protein results in decreased susceptibility to 1-UFT protocol	decreases^response to substance	16734730
1-UFT protocol	C031903		IL17RB	55540	Homo sapiens	9606	IL17RB protein results in increased susceptibility to 1-UFT protocol	increases^response to substance	16734730
1-UFT protocol	C031903		JUND	3727	Homo sapiens	9606	JUND protein results in increased susceptibility to 1-UFT protocol	increases^response to substance	16734730
1-UFT protocol	C031903		LAMP2	3920	Homo sapiens	9606	LAMP2 protein results in decreased susceptibility to 1-UFT protocol	decreases^response to substance	16734730
1-UFT protocol	C031903		LGALS4	3960	Homo sapiens	9606	LGALS4 protein results in increased susceptibility to 1-UFT protocol	increases^response to substance	16734730
1-UFT protocol	C031903		MRE11A	4361	Homo sapiens	9606	MRE11A protein results in decreased susceptibility to 1-UFT protocol	decreases^response to substance	16734730
1-UFT protocol	C031903		MYB	4602	Homo sapiens	9606	MYB protein results in increased susceptibility to 1-UFT protocol	increases^response to substance	16734730
1-UFT protocol	C031903		PKP2	5318	Homo sapiens	9606	PKP2 protein results in increased susceptibility to 1-UFT protocol	increases^response to substance	16734730
1-UFT protocol	C031903		PLCE1	51196	Homo sapiens	9606	PLCE1 protein results in increased susceptibility to 1-UFT protocol	increases^response to substance	16734730
1-UFT protocol	C031903		PRKACB	5567	Homo sapiens	9606	PRKACB protein results in decreased susceptibility to 1-UFT protocol	decreases^response to substance	16734730
1-UFT protocol	C031903		PTPN13	5783	Homo sapiens	9606	PTPN13 protein results in decreased susceptibility to 1-UFT protocol	decreases^response to substance	16734730
1-UFT protocol	C031903		PYGB	5834	Homo sapiens	9606	PYGB protein results in increased susceptibility to 1-UFT protocol	increases^response to substance	16734730
1-UFT protocol	C031903		RAB31	11031	Homo sapiens	9606	RAB31 protein results in decreased susceptibility to 1-UFT protocol	decreases^response to substance	16734730
1-UFT protocol	C031903		RAB40B	10966	Homo sapiens	9606	RAB40B protein results in increased susceptibility to 1-UFT protocol	increases^response to substance	16734730
1-UFT protocol	C031903		RRAS2	22800	Homo sapiens	9606	RRAS2 protein results in decreased susceptibility to 1-UFT protocol	decreases^response to substance	16734730
1-UFT protocol	C031903		SEC14L1	6397	Homo sapiens	9606	SEC14L1 protein results in decreased susceptibility to 1-UFT protocol	decreases^response to substance	16734730
1-UFT protocol	C031903		SEC22B	9554	Homo sapiens	9606	SEC22B protein results in decreased susceptibility to 1-UFT protocol	decreases^response to substance	16734730
1-UFT protocol	C031903		SH3BGRL	6451	Homo sapiens	9606	SH3BGRL protein results in decreased susceptibility to 1-UFT protocol	decreases^response to substance	16734730
1-UFT protocol	C031903		SMAD5	4090	Homo sapiens	9606	SMAD5 protein results in decreased susceptibility to 1-UFT protocol	decreases^response to substance	16734730
1-UFT protocol	C031903		SMARCA1	6594	Homo sapiens	9606	SMARCA1 protein results in decreased susceptibility to 1-UFT protocol	decreases^response to substance	16734730
1-UFT protocol	C031903		TEAD1	7003	Homo sapiens	9606	TEAD1 protein results in decreased susceptibility to 1-UFT protocol	decreases^response to substance	16734730
1-UFT protocol	C031903		TFF1	7031	Homo sapiens	9606	TFF1 protein results in increased susceptibility to 1-UFT protocol	increases^response to substance	16734730
1-UFT protocol	C031903		TRIM44	54765	Homo sapiens	9606	TRIM44 protein results in decreased susceptibility to 1-UFT protocol	decreases^response to substance	16734730
1-UFT protocol	C031903		UBA2	10054	Homo sapiens	9606	UBA2 protein results in decreased susceptibility to 1-UFT protocol	decreases^response to substance	16734730
20-hydroxy-5,8,11,14-eicosatetraenoic acid	C055987	79551-86-3	NFATC4	4776	Homo sapiens	9606	20-hydroxy-5,8,11,14-eicosatetraenoic acid results in increased localization of NFATC4 protein	increases^localization	16055480
20-hydroxy-5,8,11,14-eicosatetraenoic acid	C055987	79551-86-3	UGT1A1	54658	Homo sapiens	9606	UGT1A1 protein results in increased glucuronidation of 20-hydroxy-5,8,11,14-eicosatetraenoic acid	increases^glucuronidation	15231852
20-hydroxy-5,8,11,14-eicosatetraenoic acid	C055987	79551-86-3	UGT1A4	54657	Homo sapiens	9606	UGT1A4 protein results in increased glucuronidation of 20-hydroxy-5,8,11,14-eicosatetraenoic acid	increases^glucuronidation	15231852
20-hydroxy-5,8,11,14-eicosatetraenoic acid	C055987	79551-86-3	UGT2B7	7364	Homo sapiens	9606	UGT2B7 protein results in increased glucuronidation of 20-hydroxy-5,8,11,14-eicosatetraenoic acid	increases^glucuronidation	15231852
20-hydroxycholesterol	C025813	516-72-3	CYP7A1	1581	Homo sapiens	9606	CYP7A1 protein results in increased metabolism of 20-hydroxycholesterol	increases^metabolic processing	10882719
20-O-(beta-D-glucopyranosyl)-20(S)-protopanaxadiol	C482402		CASP3	836	Homo sapiens	9606	20-O-(beta-D-glucopyranosyl)-20(S)-protopanaxadiol results in increased activity of CASP3 protein	increases^activity	12963989
20-O-(beta-D-glucopyranosyl)-20(S)-protopanaxadiol	C482402		FGFR3	2261	Homo sapiens	9606	20-O-(beta-D-glucopyranosyl)-20(S)-protopanaxadiol results in decreased expression of FGFR3 mRNA	decreases^expression	12963989
20-O-(beta-D-glucopyranosyl)-20(S)-protopanaxadiol	C482402		PARP1	142	Homo sapiens	9606	20-O-(beta-D-glucopyranosyl)-20(S)-protopanaxadiol results in increased cleavage of PARP1 protein	increases^cleavage	12963989
2-(1-hexyloxyethyl)-2-devinyl pyropheophorbide-a	C083998	149402-51-7	CYP2C9	1559	Homo sapiens	9606	CYP2C9 protein results in increased abundance of 2-(1-hexyloxyethyl)-2-devinyl pyropheophorbide-a	increases^abundance	11668218
2,2-(2-chlorophenyl-4'-chlorophenyl)-1,1-dichloroethene	C054919	3424-82-6	ACVR1C	130399	Homo sapiens	9606	[Dichlorodiphenyldichloroethane co-treated with Dichlorodiphenyl Dichloroethylene co-treated with 2,2-(2-chlorophenyl-4'-chlorophenyl)-1,1-dichloroethene co-treated with Aldrin co-treated with Dieldrin] results in increased expression of ACVR1C mRNA	affects^cotreatment|increases^expression	19422813
2,2-(2-chlorophenyl-4'-chlorophenyl)-1,1-dichloroethene	C054919	3424-82-6	ACVRL1	94	Homo sapiens	9606	[Dichlorodiphenyldichloroethane co-treated with Dichlorodiphenyl Dichloroethylene co-treated with 2,2-(2-chlorophenyl-4'-chlorophenyl)-1,1-dichloroethene co-treated with Aldrin co-treated with Dieldrin] results in increased expression of ACVRL1 mRNA	affects^cotreatment|increases^expression	19422813
2,2-(2-chlorophenyl-4'-chlorophenyl)-1,1-dichloroethene	C054919	3424-82-6	ALK	238	Homo sapiens	9606	[Dichlorodiphenyldichloroethane co-treated with Dichlorodiphenyl Dichloroethylene co-treated with 2,2-(2-chlorophenyl-4'-chlorophenyl)-1,1-dichloroethene co-treated with Aldrin co-treated with Dieldrin] results in increased expression of ALK mRNA	affects^cotreatment|increases^expression	19422813
2,2-(2-chlorophenyl-4'-chlorophenyl)-1,1-dichloroethene	C054919	3424-82-6	AR	367	Homo sapiens	9606	2,2-(2-chlorophenyl-4'-chlorophenyl)-1,1-dichloroethene binds to and results in decreased activity of AR protein	affects^binding|decreases^activity	9705896
2,2-(2-chlorophenyl-4'-chlorophenyl)-1,1-dichloroethene	C054919	3424-82-6	ERBB3	2065	Homo sapiens	9606	[Dichlorodiphenyldichloroethane co-treated with Dichlorodiphenyl Dichloroethylene co-treated with 2,2-(2-chlorophenyl-4'-chlorophenyl)-1,1-dichloroethene co-treated with Aldrin co-treated with Dieldrin] results in increased expression of ERBB3 mRNA	affects^cotreatment|increases^expression	19422813
2,2-(2-chlorophenyl-4'-chlorophenyl)-1,1-dichloroethene	C054919	3424-82-6	ESR1	2099	Homo sapiens	9606	2,2-(2-chlorophenyl-4'-chlorophenyl)-1,1-dichloroethene binds to ESR1 protein	affects^binding	14579009
2,2-(2-chlorophenyl-4'-chlorophenyl)-1,1-dichloroethene	C054919	3424-82-6	GPR30	76854	Homo sapiens	9606	2,2-(2-chlorophenyl-4'-chlorophenyl)-1,1-dichloroethene binds to GPR30 protein	affects^binding	17088055
2,2-(2-chlorophenyl-4'-chlorophenyl)-1,1-dichloroethene	C054919	3424-82-6	KIT	3815	Homo sapiens	9606	[Dichlorodiphenyldichloroethane co-treated with Dichlorodiphenyl Dichloroethylene co-treated with 2,2-(2-chlorophenyl-4'-chlorophenyl)-1,1-dichloroethene co-treated with Aldrin co-treated with Dieldrin] results in increased expression of KIT mRNA	affects^cotreatment|increases^expression	19422813
2,2-(2-chlorophenyl-4'-chlorophenyl)-1,1-dichloroethene	C054919	3424-82-6	PDGFRA	5156	Homo sapiens	9606	[Dichlorodiphenyldichloroethane co-treated with Dichlorodiphenyl Dichloroethylene co-treated with 2,2-(2-chlorophenyl-4'-chlorophenyl)-1,1-dichloroethene co-treated with Aldrin co-treated with Dieldrin] results in increased expression of PDGFRA mRNA	affects^cotreatment|increases^expression	19422813
2,2-(2-chlorophenyl-4'-chlorophenyl)-1,1-dichloroethene	C054919	3424-82-6	PDGFRB	5159	Homo sapiens	9606	[Dichlorodiphenyldichloroethane co-treated with Dichlorodiphenyl Dichloroethylene co-treated with 2,2-(2-chlorophenyl-4'-chlorophenyl)-1,1-dichloroethene co-treated with Aldrin co-treated with Dieldrin] results in increased expression of PDGFRB mRNA	affects^cotreatment|increases^expression	19422813
2,2-(2-chlorophenyl-4'-chlorophenyl)-1,1-dichloroethene	C054919	3424-82-6	PGR	5241	Homo sapiens	9606	2,2-(2-chlorophenyl-4'-chlorophenyl)-1,1-dichloroethene binds to PGR protein	affects^binding	14579009
2,2',3,3',4,6'-hexachlorobiphenyl	C094859	38380-05-1	CYP11B1	1584	Homo sapiens	9606	2,2',3,3',4,6'-hexachlorobiphenyl results in increased expression of CYP11B1 mRNA	increases^expression	16396990
2,2',3,3',4,6'-hexachlorobiphenyl	C094859	38380-05-1	CYP11B2	1585	Homo sapiens	9606	2,2',3,3',4,6'-hexachlorobiphenyl results in increased expression of CYP11B2 mRNA	increases^expression	16396990
2,2',3,4,4',5',6-heptabromodiphenyl ether	C483839		AR	367	Homo sapiens	9606	2,2',3,4,4',5',6-heptabromodiphenyl ether binds to and results in decreased activity of AR protein	affects^binding|decreases^activity	16601080
2,2',3,4,4',5',6-heptabromodiphenyl ether	C483839		CYP17A1	1586	Homo sapiens	9606	2,2',3,4,4',5',6-heptabromodiphenyl ether results in decreased activity of CYP17A1 protein	decreases^activity	16828825
2,2',3,4,4',5',6-heptabromodiphenyl ether	C483839		PGR	5241	Homo sapiens	9606	2,2',3,4,4',5',6-heptabromodiphenyl ether binds to and results in decreased activity of PGR protein	affects^binding|decreases^activity	16601080
2,2',3,4,4',5',6-heptabromodiphenyl ether	C483839		SULT1A1	6817	Homo sapiens	9606	2,2',3,4,4',5',6-heptabromodiphenyl ether inhibits the reaction [[Estradiol co-treated with Phosphoadenosine Phosphosulfate] results in increased activity of SULT1A1 protein]	affects^cotreatment|decreases^reaction|increases^activity	16601080
2,2',3',4,4',5-hexachlorobiphenyl	C029790	35065-28-2	BRCA1	672	Homo sapiens	9606	2,2',3',4,4',5-hexachlorobiphenyl inhibits the reaction [Estradiol results in increased expression of BRCA1 mRNA]	decreases^reaction|increases^expression	12473173
2,2',3',4,4',5-hexachlorobiphenyl	C029790	35065-28-2	NR1I2	8856	Homo sapiens	9606	2,2',3',4,4',5-hexachlorobiphenyl binds to and results in increased activity of NR1I2 protein	affects^binding|increases^activity	20024649
2,2',3,4',5',6-hexachlorobiphenyl	C120129		CYP11A1	1583	Homo sapiens	9606	2,2',3,4',5',6-hexachlorobiphenyl results in increased expression of CYP11A1 mRNA	increases^expression	16216300
2,2',3,4',5',6-hexachlorobiphenyl	C120129		CYP11B1	1584	Homo sapiens	9606	2,2',3,4',5',6-hexachlorobiphenyl metabolite inhibits the reaction [2,2',3,4',5',6-hexachlorobiphenyl results in increased expression of CYP11B1 mRNA]	decreases^reaction|increases^expression	16216300
2,2',3,4',5',6-hexachlorobiphenyl	C120129		CYP11B2	1585	Homo sapiens	9606	2,2',3,4',5',6-hexachlorobiphenyl results in increased expression of CYP11B2 mRNA	increases^expression	16216300
2,2',3,4',5',6-hexachlorobiphenyl	C120129		CYP19A1	1588	Homo sapiens	9606	2,2',3,4',5',6-hexachlorobiphenyl metabolite results in increased expression of CYP19A1 mRNA	increases^expression	16216300
2,2',3,4',5',6-hexachlorobiphenyl	C120129		CYP21A2	1589	Homo sapiens	9606	2,2',3,4',5',6-hexachlorobiphenyl results in increased expression of CYP21A2 mRNA	increases^expression	16216300
2,2',3,4',5',6-hexachlorobiphenyl	C120129		HSD17B1	3292	Homo sapiens	9606	2,2',3,4',5',6-hexachlorobiphenyl metabolite inhibits the reaction [2,2',3,4',5',6-hexachlorobiphenyl results in increased expression of HSD17B1 mRNA]	decreases^reaction|increases^expression	16216300
2,2',3,4',5',6-hexachlorobiphenyl	C120129		HSD3B1	3283	Homo sapiens	9606	2,2',3,4',5',6-hexachlorobiphenyl metabolite inhibits the reaction [2,2',3,4',5',6-hexachlorobiphenyl results in increased expression of HSD3B1 mRNA]	decreases^reaction|increases^expression	16216300
2,2',3,4',5',6-hexachlorobiphenyl	C120129		HSD3B2	3284	Homo sapiens	9606	2,2',3,4',5',6-hexachlorobiphenyl metabolite inhibits the reaction [2,2',3,4',5',6-hexachlorobiphenyl results in increased expression of HSD3B2 mRNA]	decreases^reaction|increases^expression	16216300
2-(2-(3,4-dichlorophenyl)-2,3-dihydro-1H-isoindol-5-ylamino)nicotinic acid	C527832		KCNH2	3757	Homo sapiens	9606	2-(2-(3,4-dichlorophenyl)-2,3-dihydro-1H-isoindol-5-ylamino)nicotinic acid results in increased activity of KCNH2 protein	increases^activity	15976038
2,2',3,5',6-pentachlorobiphenyl	C032904	38379-99-6	GABRA1	2554	Homo sapiens	9606	[2,2',3,5',6-pentachlorobiphenyl co-treated with gamma-Aminobutyric Acid] binds to and results in increased activity of [GABRA1 protein binds to GABRB2 protein binds to GABRG2 protein]	affects^binding|affects^cotreatment|increases^activity	20819908
2,2',3,5',6-pentachlorobiphenyl	C032904	38379-99-6	GABRB2	2561	Homo sapiens	9606	[2,2',3,5',6-pentachlorobiphenyl co-treated with gamma-Aminobutyric Acid] binds to and results in increased activity of [GABRA1 protein binds to GABRB2 protein binds to GABRG2 protein]	affects^binding|affects^cotreatment|increases^activity	20819908
2,2',3,5',6-pentachlorobiphenyl	C032904	38379-99-6	GABRG2	2566	Homo sapiens	9606	[2,2',3,5',6-pentachlorobiphenyl co-treated with gamma-Aminobutyric Acid] binds to and results in increased activity of [GABRA1 protein binds to GABRB2 protein binds to GABRG2 protein]	affects^binding|affects^cotreatment|increases^activity	20819908
2-(2-(3,5-difluorophenyl)-2-hydroxyacetamido)-N-(3-methyl-4-oxo-4,5-dihydro-3H-benzo(d)(1,2)diazepin-5-yl)propanamide	C522903		HM13	81502	Homo sapiens	9606	2-(2-(3,5-difluorophenyl)-2-hydroxyacetamido)-N-(3-methyl-4-oxo-4,5-dihydro-3H-benzo(d)(1,2)diazepin-5-yl)propanamide binds to and results in decreased activity of HM13 protein	affects^binding|decreases^activity	17932033
2,2',4,4',5-brominated diphenyl ether	C477694		AR	367	Homo sapiens	9606	2,2',4,4',5-brominated diphenyl ether binds to and results in decreased activity of AR protein	affects^binding|decreases^activity	16601080
2,2',4,4',5-brominated diphenyl ether	C477694		PGR	5241	Homo sapiens	9606	2,2',4,4',5-brominated diphenyl ether binds to and results in decreased activity of PGR protein	affects^binding|decreases^activity	16601080
2-(2-(4-(4-nitrobenzyloxy)phenyl)ethyl)isothiourea methanesulfonate	C101670		ACTA2	59	Homo sapiens	9606	2-(2-(4-(4-nitrobenzyloxy)phenyl)ethyl)isothiourea methanesulfonate inhibits the reaction [TGFB1 protein results in increased expression of ACTA2 mRNA]	decreases^reaction|increases^expression	15703175
2-(2-(4-(4-nitrobenzyloxy)phenyl)ethyl)isothiourea methanesulfonate	C101670		BDKRB1	623	Homo sapiens	9606	2-(2-(4-(4-nitrobenzyloxy)phenyl)ethyl)isothiourea methanesulfonate inhibits the reaction [[kallidin, des-Arg(10)- results in increased activity of BDKRB1 protein] which results in increased abundance of Calcium]	decreases^reaction|increases^abundance|increases^activity	15703175
2-(2-(4-(4-nitrobenzyloxy)phenyl)ethyl)isothiourea methanesulfonate	C101670		COL1A1	1277	Homo sapiens	9606	2-(2-(4-(4-nitrobenzyloxy)phenyl)ethyl)isothiourea methanesulfonate inhibits the reaction [TGFB1 protein results in increased expression of COL1A1 mRNA]	decreases^reaction|increases^expression	15703175
2-(2-(4-(4-nitrobenzyloxy)phenyl)ethyl)isothiourea methanesulfonate	C101670		CTGF	1490	Homo sapiens	9606	2-(2-(4-(4-nitrobenzyloxy)phenyl)ethyl)isothiourea methanesulfonate inhibits the reaction [kallidin, des-Arg(10)- results in increased expression of CTGF mRNA]	decreases^reaction|increases^expression	15703175
2-(2-(4-(4-nitrobenzyloxy)phenyl)ethyl)isothiourea methanesulfonate	C101670		FOS	2353	Homo sapiens	9606	2-(2-(4-(4-nitrobenzyloxy)phenyl)ethyl)isothiourea methanesulfonate inhibits the reaction [bufalin results in increased expression of FOS mRNA]	decreases^reaction|increases^expression	10712238
2-(2-(4-(4-nitrobenzyloxy)phenyl)ethyl)isothiourea methanesulfonate	C101670		IL1B	3553	Homo sapiens	9606	2-(2-(4-(4-nitrobenzyloxy)phenyl)ethyl)isothiourea methanesulfonate inhibits the reaction [bufalin results in increased expression of IL1B mRNA]	decreases^reaction|increases^expression	10712238
2-(2-(4-(4-nitrobenzyloxy)phenyl)ethyl)isothiourea methanesulfonate	C101670		MAPK1	5594	Homo sapiens	9606	2-(2-(4-(4-nitrobenzyloxy)phenyl)ethyl)isothiourea methanesulfonate inhibits the reaction [bufalin results in increased phosphorylation of MAPK1 protein]	decreases^reaction|increases^phosphorylation	10712238
2-(2-(4-(4-nitrobenzyloxy)phenyl)ethyl)isothiourea methanesulfonate	C101670		MAPK3	5595	Homo sapiens	9606	2-(2-(4-(4-nitrobenzyloxy)phenyl)ethyl)isothiourea methanesulfonate inhibits the reaction [bufalin results in increased phosphorylation of MAPK3 protein]	decreases^reaction|increases^phosphorylation	10712238
2-(2-(4-(4-nitrobenzyloxy)phenyl)ethyl)isothiourea methanesulfonate	C101670		SLC8A1	6546	Homo sapiens	9606	2-(2-(4-(4-nitrobenzyloxy)phenyl)ethyl)isothiourea methanesulfonate inhibits the reaction [SLC8A1 protein results in increased susceptibility to Chlorodiphenyl (54% Chlorine)]	decreases^reaction|increases^response to substance	16009740
2-(2-(4-(4-nitrobenzyloxy)phenyl)ethyl)isothiourea methanesulfonate	C101670		TGFB1	7040	Homo sapiens	9606	2-(2-(4-(4-nitrobenzyloxy)phenyl)ethyl)isothiourea methanesulfonate inhibits the reaction [TGFB1 protein results in increased expression of ACTA2 mRNA]	decreases^reaction|increases^expression	15703175
2,2,4,4-tetrabromodiphenyl ether	C511295		NR1I2	8856	Homo sapiens	9606	2,2,4,4-tetrabromodiphenyl ether results in increased activity of NR1I2 protein	increases^activity	17324954
2,2',4,4'-tetrahydroxybenzophenone	C035476	131-55-5	ESR1	2099	Homo sapiens	9606	2,2',4,4'-tetrahydroxybenzophenone binds to and results in increased activity of ESR1 protein	affects^binding|increases^activity	12765246|16079615
2,2',4,4'-tetrahydroxybenzophenone	C035476	131-55-5	ESR2	2100	Homo sapiens	9606	2,2',4,4'-tetrahydroxybenzophenone binds to and results in increased activity of ESR2 protein	affects^binding|increases^activity	16079615
2,2',4,6,6'-pentachlorobiphenyl	C417207		AKT1	207	Homo sapiens	9606	SRC protein promotes the reaction [2,2',4,6,6'-pentachlorobiphenyl results in increased phosphorylation of AKT1 protein]	increases^phosphorylation|increases^reaction	16611624
2,2',4,6,6'-pentachlorobiphenyl	C417207		CASP3	836	Homo sapiens	9606	2,2',4,6,6'-pentachlorobiphenyl results in increased cleavage of CASP3 protein	increases^cleavage	11076690
2,2',4,6,6'-pentachlorobiphenyl	C417207		EGFR	1956	Homo sapiens	9606	2,2',4,6,6'-pentachlorobiphenyl results in increased phosphorylation of EGFR protein	increases^phosphorylation	16778083
2,2',4,6,6'-pentachlorobiphenyl	C417207		FOS	2353	Homo sapiens	9606	2,2',4,6,6'-pentachlorobiphenyl results in increased activity of FOS protein	increases^activity	16611624
2,2',4,6,6'-pentachlorobiphenyl	C417207		IL8	3576	Homo sapiens	9606	2,2',4,6,6'-pentachlorobiphenyl results in increased expression of IL8 mRNA	increases^expression	16611624
2,2',4,6,6'-pentachlorobiphenyl	C417207		JAK3	3718	Homo sapiens	9606	2,2',4,6,6'-pentachlorobiphenyl results in increased phosphorylation of JAK3 protein	increases^phosphorylation	16778083
2,2',4,6,6'-pentachlorobiphenyl	C417207		JUN	3725	Homo sapiens	9606	2,2',4,6,6'-pentachlorobiphenyl results in increased activity of JUN protein	increases^activity	16611624
2,2',4,6,6'-pentachlorobiphenyl	C417207		MAPK1	5594	Homo sapiens	9606	2,2',4,6,6'-pentachlorobiphenyl results in increased phosphorylation of MAPK1 protein	increases^phosphorylation	16778083
2,2',4,6,6'-pentachlorobiphenyl	C417207		MAPK3	5595	Homo sapiens	9606	2,2',4,6,6'-pentachlorobiphenyl results in increased phosphorylation of MAPK3 protein	increases^phosphorylation	16778083
2,2',4,6,6'-pentachlorobiphenyl	C417207		MAPK8	5599	Homo sapiens	9606	2,2',4,6,6'-pentachlorobiphenyl results in increased phosphorylation of MAPK8 protein	increases^phosphorylation	16778083
2,2',4,6,6'-pentachlorobiphenyl	C417207		MMP3	4314	Homo sapiens	9606	2,2',4,6,6'-pentachlorobiphenyl results in increased expression of MMP3 mRNA	increases^expression	16778083
2,2',4,6,6'-pentachlorobiphenyl	C417207		NFKB1	4790	Homo sapiens	9606	2,2',4,6,6'-pentachlorobiphenyl results in increased activity of NFKB1 protein	increases^activity	16611624
2,2',4,6,6'-pentachlorobiphenyl	C417207		REL	5966	Homo sapiens	9606	2,2',4,6,6'-pentachlorobiphenyl results in increased activity of REL protein	increases^activity	16611624
2,2',4,6,6'-pentachlorobiphenyl	C417207		SRC	6714	Homo sapiens	9606	2,2',4,6,6'-pentachlorobiphenyl results in increased phosphorylation of SRC protein	increases^phosphorylation	16611624
2,2',4,6'-tetramethoxystilbene	C541980		CYP1A1	1543	Homo sapiens	9606	2,2',4,6'-tetramethoxystilbene inhibits the reaction [Tetrachlorodibenzodioxin results in increased expression of CYP1A1 mRNA]	decreases^reaction|increases^expression	19463925
2,2',4,6'-tetramethoxystilbene	C541980		CYP1A2	1544	Homo sapiens	9606	2,2',4,6'-tetramethoxystilbene results in decreased activity of CYP1A2 protein	decreases^activity	19463925
2,2',4,6'-tetramethoxystilbene	C541980		CYP1B1	1545	Homo sapiens	9606	2,2',4,6'-tetramethoxystilbene inhibits the reaction [Tetrachlorodibenzodioxin results in increased expression of CYP1B1 mRNA]	decreases^reaction|increases^expression	19463925
2-(2-(4-chlorophenyl)ethoxy)adenosine	C476036		MMP14	4323	Homo sapiens	9606	2-(2-(4-chlorophenyl)ethoxy)adenosine results in decreased expression of MMP14 mRNA	decreases^expression	16783407
2-((2,6-dichlorophenyl)amino)benzeneacetic acid 4-(3H-1,2-dithiol-3-thione-5-yl)phenyl ester	C520611		AHR	196	Homo sapiens	9606	2-((2,6-dichlorophenyl)amino)benzeneacetic acid 4-(3H-1,2-dithiol-3-thione-5-yl)phenyl ester inhibits the reaction [Tetrachlorodibenzodioxin results in increased activity of AHR protein]	decreases^reaction|increases^activity	19276279
2-((2,6-dichlorophenyl)amino)benzeneacetic acid 4-(3H-1,2-dithiol-3-thione-5-yl)phenyl ester	C520611		CYP1A1	1543	Homo sapiens	9606	2-((2,6-dichlorophenyl)amino)benzeneacetic acid 4-(3H-1,2-dithiol-3-thione-5-yl)phenyl ester inhibits the reaction [9,10-Dimethyl-1,2-benzanthracene results in increased activity of CYP1A1 protein]	decreases^reaction|increases^activity	19276279
2-((2,6-dichlorophenyl)amino)benzeneacetic acid 4-(3H-1,2-dithiol-3-thione-5-yl)phenyl ester	C520611		CYP1A2	1544	Homo sapiens	9606	2-((2,6-dichlorophenyl)amino)benzeneacetic acid 4-(3H-1,2-dithiol-3-thione-5-yl)phenyl ester inhibits the reaction [9,10-Dimethyl-1,2-benzanthracene results in increased expression of CYP1A2 mRNA]	decreases^reaction|increases^expression	19276279
2-((2,6-dichlorophenyl)amino)benzeneacetic acid 4-(3H-1,2-dithiol-3-thione-5-yl)phenyl ester	C520611		CYP1B1	1545	Homo sapiens	9606	2-((2,6-dichlorophenyl)amino)benzeneacetic acid 4-(3H-1,2-dithiol-3-thione-5-yl)phenyl ester inhibits the reaction [9,10-Dimethyl-1,2-benzanthracene results in increased expression of CYP1B1 mRNA]	decreases^reaction|increases^expression	19276279
2-(2,6-diisopropylphenyl)-5-hydroxy-1H-isoindole-1,3-dione	C501339		CASP3	836	Homo sapiens	9606	2-(2,6-diisopropylphenyl)-5-hydroxy-1H-isoindole-1,3-dione results in increased activity of CASP3 protein	increases^activity	18204782
(2-(2',6'-dimethoxy)phenoxyethylamino)methylbenzo-1,4-dioxane	C010654	613-67-2	HTR1A	3350	Homo sapiens	9606	(2-(2',6'-dimethoxy)phenoxyethylamino)methylbenzo-1,4-dioxane binds to HTR1A protein	affects^binding	2891550
2,2'-azobis(2-amidinopropane)	C046728	13217-66-8	APOA1	335	Homo sapiens	9606	2,2'-azobis(2-amidinopropane) results in increased oxidation of APOA1 protein	increases^oxidation	12576517
2,2'-azobis(2-amidinopropane)	C046728	13217-66-8	APOA2	336	Homo sapiens	9606	2,2'-azobis(2-amidinopropane) results in increased oxidation of APOA2 protein	increases^oxidation	12576517
2,2'-azobis(2-amidinopropane)	C046728	13217-66-8	CAT	847	Homo sapiens	9606	2,2'-azobis(2-amidinopropane) results in decreased activity of CAT protein	decreases^activity	12628296
2,2'-azobis(2-amidinopropane)	C046728	13217-66-8	G6PD	2539	Homo sapiens	9606	2,2'-azobis(2-amidinopropane) results in decreased activity of G6PD protein	decreases^activity	12628296
2,2-bis(4-glycidyloxyphenyl)propane	C019273	1675-54-3	AR	367	Homo sapiens	9606	2,2-bis(4-glycidyloxyphenyl)propane analog binds to and results in decreased activity of AR protein	affects^binding|decreases^activity	15110108
2,2-bis(4-glycidyloxyphenyl)propane	C019273	1675-54-3	CASP3	836	Homo sapiens	9606	2,2-bis(4-glycidyloxyphenyl)propane inhibits the reaction [PPARG protein promotes the reaction [mono-(2-ethylhexyl)phthalate results in increased activity of CASP3 protein]]	decreases^reaction|increases^activity|increases^reaction	12927354
2,2-bis(4-glycidyloxyphenyl)propane	C019273	1675-54-3	CAV1	857	Homo sapiens	9606	2,2-bis(4-glycidyloxyphenyl)propane inhibits the reaction [rosiglitazone results in increased expression of CAV1 protein]	decreases^reaction|increases^expression	16806087
2,2-bis(4-glycidyloxyphenyl)propane	C019273	1675-54-3	CAV2	858	Homo sapiens	9606	2,2-bis(4-glycidyloxyphenyl)propane inhibits the reaction [rosiglitazone results in increased expression of CAV2 protein]	decreases^reaction|increases^expression	16806087
2,2-bis(4-glycidyloxyphenyl)propane	C019273	1675-54-3	CCL2	6347	Homo sapiens	9606	2,2-bis(4-glycidyloxyphenyl)propane inhibits the reaction [Eicosapentaenoic Acid inhibits the reaction [Lipopolysaccharides results in increased expression of CCL2 mRNA]]	decreases^reaction|increases^expression	15698426
2,2-bis(4-glycidyloxyphenyl)propane	C019273	1675-54-3	NPHS1	4868	Homo sapiens	9606	2,2-bis(4-glycidyloxyphenyl)propane inhibits the reaction [pioglitazone results in increased expression of NPHS1 mRNA]	decreases^reaction|increases^expression	16687628
2,2-bis(4-glycidyloxyphenyl)propane	C019273	1675-54-3	NR3C1	2908	Homo sapiens	9606	2,2-bis(4-glycidyloxyphenyl)propane promotes the reaction [Dexamethasone binds to NR3C1 protein]	affects^binding|increases^reaction	15187150
2,2-bis(4-glycidyloxyphenyl)propane	C019273	1675-54-3	PPARG	5468	Homo sapiens	9606	2,2-bis(4-glycidyloxyphenyl)propane binds to and results in decreased activity of PPARG protein	affects^binding|decreases^activity	14998300|12927354|15383218|15187150
2,2-bis(4-glycidyloxyphenyl)propane	C019273	1675-54-3	PTEN	5728	Homo sapiens	9606	2,2-bis(4-glycidyloxyphenyl)propane inhibits the reaction [1-(methylimino-N-oxy)-6-(2-morpholinoethoxy)-3-phenyl-1H-indene-2-carboxylic acid ethyl ester results in increased expression of PTEN protein]	decreases^reaction|increases^expression	16806087
2,2-bis(4-glycidyloxyphenyl)propane	C019273	1675-54-3	PTGS2	5743	Homo sapiens	9606	2,2-bis(4-glycidyloxyphenyl)propane inhibits the reaction [rosiglitazone inhibits the reaction [VEGFA protein results in increased expression of PTGS2 protein]]	decreases^reaction|increases^expression	20032081
2,2-bis(4-glycidyloxyphenyl)propane	C019273	1675-54-3	RARB	5915	Homo sapiens	9606	2,2-bis(4-glycidyloxyphenyl)propane inhibits the reaction [ciglitazone promotes the reaction [SR 11237 results in increased expression of RARB protein]]	decreases^reaction|increases^expression|increases^reaction	12839938
2,2-bis(4-glycidyloxyphenyl)propane	C019273	1675-54-3	RELA	5970	Homo sapiens	9606	2,2-bis(4-glycidyloxyphenyl)propane inhibits the reaction [Docosahexaenoic Acids inhibits the reaction [Lipopolysaccharides results in increased activity of RELA protein]]	decreases^reaction|increases^activity	15698426
2,2-bis(4-glycidyloxyphenyl)propane	C019273	1675-54-3	VEGFA	7422	Homo sapiens	9606	2,2-bis(4-glycidyloxyphenyl)propane inhibits the reaction [rosiglitazone inhibits the reaction [VEGFA protein results in increased expression of PTGS2 protein]]	decreases^reaction|increases^expression	20032081
2,2-bis(4-hydroxyphenyl)-1,1,1-trichloroethane	C404910	2971-36-0	AR	367	Homo sapiens	9606	2,2-bis(4-hydroxyphenyl)-1,1,1-trichloroethane binds to and results in decreased activity of AR protein	affects^binding|decreases^activity	10999957|11861976|15026081|9705896|15483189
2,2-bis(4-hydroxyphenyl)-1,1,1-trichloroethane	C404910	2971-36-0	ESR1	2099	Homo sapiens	9606	2,2-bis(4-hydroxyphenyl)-1,1,1-trichloroethane binds to and results in increased activity of ESR1 protein	affects^binding|increases^activity	11530281|10999957|10774817|15840436|10579340
2,2-bis(4-hydroxyphenyl)-1,1,1-trichloroethane	C404910	2971-36-0	ESR2	2100	Homo sapiens	9606	2,2-bis(4-hydroxyphenyl)-1,1,1-trichloroethane binds to and results in decreased activity of ESR2 protein	affects^binding|decreases^activity	15840436|10579340|11861976|10999957
2,2-bis(bromomethyl)-1,3-propanediol	C060080	3296-90-0	UGT2B7	7364	Homo sapiens	9606	UGT2B7 protein results in increased glucuronidation of 2,2-bis(bromomethyl)-1,3-propanediol	increases^glucuronidation	20200232
2,2-bis(hydroxymethyl)-1-azabicyclo(2,2,2,)octan-3-one	C451219		BAX	581	Homo sapiens	9606	2,2-bis(hydroxymethyl)-1-azabicyclo(2,2,2,)octan-3-one results in increased expression of BAX	increases^expression	21647879
2,2-bis(hydroxymethyl)-1-azabicyclo(2,2,2,)octan-3-one	C451219		BBC3	27113	Homo sapiens	9606	2,2-bis(hydroxymethyl)-1-azabicyclo(2,2,2,)octan-3-one promotes the reaction [Cisplatin results in increased expression of BBC3 mRNA]	increases^expression|increases^reaction	21109480
2,2-bis(hydroxymethyl)-1-azabicyclo(2,2,2,)octan-3-one	C451219		BCL2L1	598	Homo sapiens	9606	2,2-bis(hydroxymethyl)-1-azabicyclo(2,2,2,)octan-3-one results in decreased expression of BCL2L1 protein	decreases^expression	21109480
2,2-bis(hydroxymethyl)-1-azabicyclo(2,2,2,)octan-3-one	C451219		CASP3	836	Homo sapiens	9606	2,2-bis(hydroxymethyl)-1-azabicyclo(2,2,2,)octan-3-one results in increased cleavage of and results in increased activity of CASP3 protein	increases^activity|increases^cleavage	21109480
2,2-bis(hydroxymethyl)-1-azabicyclo(2,2,2,)octan-3-one	C451219		CDKN1A	1026	Homo sapiens	9606	2,2-bis(hydroxymethyl)-1-azabicyclo(2,2,2,)octan-3-one results in increased expression of CDKN1A	increases^expression	21647879
2,2-bis(hydroxymethyl)-1-azabicyclo(2,2,2,)octan-3-one	C451219		MDM2	4193	Homo sapiens	9606	2,2-bis(hydroxymethyl)-1-azabicyclo(2,2,2,)octan-3-one results in increased expression of MDM2	increases^expression	21647879
2,2-bis(hydroxymethyl)-1-azabicyclo(2,2,2,)octan-3-one	C451219		PMAIP1	5366	Homo sapiens	9606	[2,2-bis(hydroxymethyl)-1-azabicyclo(2,2,2,)octan-3-one co-treated with Cisplatin] results in increased expression of PMAIP1 mRNA	affects^cotreatment|increases^expression	21109480
2,2-bis(hydroxymethyl)-1-azabicyclo(2,2,2,)octan-3-one	C451219		TP53	7157	Homo sapiens	9606	2,2-bis(hydroxymethyl)-1-azabicyclo(2,2,2,)octan-3-one inhibits the reaction [TP53 protein mutant form binds to TP73 protein]	affects^binding|decreases^reaction	21647879
2,2-bis(hydroxymethyl)-1-azabicyclo(2,2,2,)octan-3-one	C451219		TP73	7161	Homo sapiens	9606	2,2-bis(hydroxymethyl)-1-azabicyclo(2,2,2,)octan-3-one inhibits the reaction [TP53 protein mutant form binds to TP73 protein]	affects^binding|decreases^reaction	21647879
2,2-bis(hydroxymethyl)-1-azabicyclo(2,2,2,)octan-3-one	C451219		VEGFA	7422	Homo sapiens	9606	2,2-bis(hydroxymethyl)-1-azabicyclo(2,2,2,)octan-3-one inhibits the reaction [Progestins results in increased expression of VEGFA mRNA]	decreases^reaction|increases^expression	15860260
2-(2-chloro-4-iodophenylamino)-N-cyclopropylmethoxy-3,4-difluoro-5-bromobenzamide	C488185		FGF1	2246	Homo sapiens	9606	FGF1 protein inhibits the reaction [2-(2-chloro-4-iodophenylamino)-N-cyclopropylmethoxy-3,4-difluoro-5-bromobenzamide results in decreased phosphorylation of and results in decreased activity of MAPK1 protein]	decreases^activity|decreases^phosphorylation|decreases^reaction	15231676
2-(2-chloro-4-iodophenylamino)-N-cyclopropylmethoxy-3,4-difluoro-5-bromobenzamide	C488185		MAPK1	5594	Homo sapiens	9606	FGF1 protein inhibits the reaction [2-(2-chloro-4-iodophenylamino)-N-cyclopropylmethoxy-3,4-difluoro-5-bromobenzamide results in decreased phosphorylation of and results in decreased activity of MAPK1 protein]	decreases^activity|decreases^phosphorylation|decreases^reaction	15231676
2-(2-chloro-4-iodophenylamino)-N-cyclopropylmethoxy-3,4-difluoro-5-bromobenzamide	C488185		MAPK3	5595	Homo sapiens	9606	FGF1 protein inhibits the reaction [2-(2-chloro-4-iodophenylamino)-N-cyclopropylmethoxy-3,4-difluoro-5-bromobenzamide results in decreased phosphorylation of and results in decreased activity of MAPK3 protein]	decreases^activity|decreases^phosphorylation|decreases^reaction	15231676
2-(2-chloro-4-iodophenylamino)-N-cyclopropylmethoxy-3,4-difluoro-5-bromobenzamide	C488185		NRG1	3084	Homo sapiens	9606	NRG1 protein alternative form inhibits the reaction [2-(2-chloro-4-iodophenylamino)-N-cyclopropylmethoxy-3,4-difluoro-5-bromobenzamide results in decreased phosphorylation of and results in decreased activity of MAPK1 protein]	decreases^activity|decreases^phosphorylation|decreases^reaction	15231676
2-(2-chloro-4-iodophenylamino)-N-cyclopropylmethoxy-3,4-difluorobenzamide	C120227		AIF	33390	Homo sapiens	9606	[sorafenib co-treated with 2-(2-chloro-4-iodophenylamino)-N-cyclopropylmethoxy-3,4-difluorobenzamide] affects the localization of AIF protein	affects^cotreatment|affects^localization	20117835
2-(2-chloro-4-iodophenylamino)-N-cyclopropylmethoxy-3,4-difluorobenzamide	C120227		CASP3	836	Homo sapiens	9606	2-(2-chloro-4-iodophenylamino)-N-cyclopropylmethoxy-3,4-difluorobenzamide results in increased cleavage of CASP3 protein	increases^cleavage	16239399
2-(2-chloro-4-iodophenylamino)-N-cyclopropylmethoxy-3,4-difluorobenzamide	C120227		CASP9	842	Homo sapiens	9606	[sorafenib co-treated with 2-(2-chloro-4-iodophenylamino)-N-cyclopropylmethoxy-3,4-difluorobenzamide] results in increased cleavage of CASP9 protein	affects^cotreatment|increases^cleavage	20117835
2-(2-chloro-4-iodophenylamino)-N-cyclopropylmethoxy-3,4-difluorobenzamide	C120227		CAV1	857	Homo sapiens	9606	2-(2-chloro-4-iodophenylamino)-N-cyclopropylmethoxy-3,4-difluorobenzamide results in increased expression of CAV1 protein	increases^expression	19288272
2-(2-chloro-4-iodophenylamino)-N-cyclopropylmethoxy-3,4-difluorobenzamide	C120227		CD38	952	Homo sapiens	9606	2-(2-chloro-4-iodophenylamino)-N-cyclopropylmethoxy-3,4-difluorobenzamide inhibits the reaction [Tretinoin results in increased expression of CD38 protein]	decreases^reaction|increases^expression	17077328
2-(2-chloro-4-iodophenylamino)-N-cyclopropylmethoxy-3,4-difluorobenzamide	C120227		EGFR	1956	Homo sapiens	9606	2-(2-chloro-4-iodophenylamino)-N-cyclopropylmethoxy-3,4-difluorobenzamide results in decreased phosphorylation of EGFR protein	decreases^phosphorylation	16261397
2-(2-chloro-4-iodophenylamino)-N-cyclopropylmethoxy-3,4-difluorobenzamide	C120227		ITGAM	3684	Homo sapiens	9606	2-(2-chloro-4-iodophenylamino)-N-cyclopropylmethoxy-3,4-difluorobenzamide inhibits the reaction [Tretinoin results in increased expression of ITGAM protein]	decreases^reaction|increases^expression	17077328
2-(2-chloro-4-iodophenylamino)-N-cyclopropylmethoxy-3,4-difluorobenzamide	C120227		MAP2K1	5604	Homo sapiens	9606	2-(2-chloro-4-iodophenylamino)-N-cyclopropylmethoxy-3,4-difluorobenzamide results in decreased activity of MAP2K1 protein	decreases^activity	18393446
2-(2-chloro-4-iodophenylamino)-N-cyclopropylmethoxy-3,4-difluorobenzamide	C120227		MAPK1	5594	Homo sapiens	9606	2-(2-chloro-4-iodophenylamino)-N-cyclopropylmethoxy-3,4-difluorobenzamide inhibits the reaction [Tetradecanoylphorbol Acetate results in increased activity of MAPK1 protein]	decreases^reaction|increases^activity	11728381
2-(2-chloro-4-iodophenylamino)-N-cyclopropylmethoxy-3,4-difluorobenzamide	C120227		MAPK3	5595	Homo sapiens	9606	2-(2-chloro-4-iodophenylamino)-N-cyclopropylmethoxy-3,4-difluorobenzamide inhibits the reaction [Tetradecanoylphorbol Acetate results in increased activity of MAPK3 protein]	decreases^reaction|increases^activity	11728381
2-(2-chloro-4-iodophenylamino)-N-cyclopropylmethoxy-3,4-difluorobenzamide	C120227		MCL1	4170	Homo sapiens	9606	MCL1 protein results in decreased susceptibility to [sorafenib co-treated with 2-(2-chloro-4-iodophenylamino)-N-cyclopropylmethoxy-3,4-difluorobenzamide]	affects^cotreatment|decreases^response to substance	20117835
2-(2-chloro-4-iodophenylamino)-N-cyclopropylmethoxy-3,4-difluorobenzamide	C120227		MKI67	4288	Homo sapiens	9606	[7-hydroxystaurosporine co-treated with 2-(2-chloro-4-iodophenylamino)-N-cyclopropylmethoxy-3,4-difluorobenzamide] results in decreased expression of MKI67 protein	affects^cotreatment|decreases^expression	16319524
2-(2-chloro-4-iodophenylamino)-N-cyclopropylmethoxy-3,4-difluorobenzamide	C120227		PECAM1	5175	Homo sapiens	9606	[7-hydroxystaurosporine co-treated with 2-(2-chloro-4-iodophenylamino)-N-cyclopropylmethoxy-3,4-difluorobenzamide] results in decreased expression of PECAM1 protein	affects^cotreatment|decreases^expression	16319524
2-(2-chloro-4-iodophenylamino)-N-cyclopropylmethoxy-3,4-difluorobenzamide	C120227		RARB	5915	Homo sapiens	9606	2-(2-chloro-4-iodophenylamino)-N-cyclopropylmethoxy-3,4-difluorobenzamide inhibits the reaction [Tretinoin results in increased expression of RARB mRNA]	decreases^reaction|increases^expression	17077328
2-(2-chloro-4-iodophenylamino)-N-cyclopropylmethoxy-3,4-difluorobenzamide	C120227		TP53AIP1	63970	Homo sapiens	9606	[arsenic trioxide co-treated with 2-(2-chloro-4-iodophenylamino)-N-cyclopropylmethoxy-3,4-difluorobenzamide] promotes the reaction [TP73 protein binds to TP53AIP1 promoter]	affects^binding|affects^cotreatment|increases^reaction	15031205
2-(2-chloro-4-iodophenylamino)-N-cyclopropylmethoxy-3,4-difluorobenzamide	C120227		TP73	7161	Homo sapiens	9606	2-(2-chloro-4-iodophenylamino)-N-cyclopropylmethoxy-3,4-difluorobenzamide affects the expression of TP73 protein alternative form	affects^expression	16467208
2-((((2-chloroethyl)nitrosoamino)carbonyl)amino)propanamide	C044565	92891-93-5	CASP3	836	Homo sapiens	9606	2-((((2-chloroethyl)nitrosoamino)carbonyl)amino)propanamide results in increased cleavage of CASP3 protein	increases^cleavage	16142332
2-((((2-chloroethyl)nitrosoamino)carbonyl)amino)propanamide	C044565	92891-93-5	CASP7	840	Homo sapiens	9606	2-((((2-chloroethyl)nitrosoamino)carbonyl)amino)propanamide results in increased cleavage of CASP7 protein	increases^cleavage	16142332
2-((((2-chloroethyl)nitrosoamino)carbonyl)amino)propanamide	C044565	92891-93-5	CCND1	595	Homo sapiens	9606	2-((((2-chloroethyl)nitrosoamino)carbonyl)amino)propanamide results in decreased expression of CCND1 protein	decreases^expression	16142332
2-((((2-chloroethyl)nitrosoamino)carbonyl)amino)propanamide	C044565	92891-93-5	CDK1	983	Homo sapiens	9606	2-((((2-chloroethyl)nitrosoamino)carbonyl)amino)propanamide results in decreased activity of CDK1 protein	decreases^activity	15529313|16142332|15754328
2-((((2-chloroethyl)nitrosoamino)carbonyl)amino)propanamide	C044565	92891-93-5	CDKN1A	1026	Homo sapiens	9606	2-((((2-chloroethyl)nitrosoamino)carbonyl)amino)propanamide results in decreased expression of CDKN1A	decreases^expression	16142332
2-((((2-chloroethyl)nitrosoamino)carbonyl)amino)propanamide	C044565	92891-93-5	MGMT	4255	Homo sapiens	9606	MGMT protein mutant form results in decreased susceptibility to [2-((((2-chloroethyl)nitrosoamino)carbonyl)amino)propanamide co-treated with O(6)-benzylguanine]	affects^cotreatment|decreases^response to substance	12850483
2-((((2-chloroethyl)nitrosoamino)carbonyl)amino)propanamide	C044565	92891-93-5	PARP1	142	Homo sapiens	9606	2-((((2-chloroethyl)nitrosoamino)carbonyl)amino)propanamide results in increased cleavage of PARP1 protein	increases^cleavage	16142332
2-((((2-chloroethyl)nitrosoamino)carbonyl)amino)propanamide	C044565	92891-93-5	TP53	7157	Homo sapiens	9606	2-((((2-chloroethyl)nitrosoamino)carbonyl)amino)propanamide results in increased expression of TP53	increases^expression	16142332
2-((((2-chloroethyl)nitrosoamino)carbonyl)amino)propanamide	C044565	92891-93-5	WEE1	7465	Homo sapiens	9606	2-((((2-chloroethyl)nitrosoamino)carbonyl)amino)propanamide results in decreased expression of WEE1 protein	decreases^expression	16142332
2,2-di(4-methacryloxyphenyl)propane	C002462	3253-39-2	ESR1	2099	Homo sapiens	9606	[Bisphenol A-Glycidyl Methacrylate co-treated with 2,2-di(4-methacryloxyphenyl)propane co-treated with triethylene glycol dimethacrylate] results in increased activity of ESR1 protein	affects^cotreatment|increases^activity	11145352
2,2-di(4-methacryloxyphenyl)propane	C002462	3253-39-2	PTGS2	5743	Homo sapiens	9606	[2,2-di(4-methacryloxyphenyl)propane co-treated with triethylene glycol dimethacrylate co-treated with Bisphenol A-Glycidyl Methacrylate co-treated with Benzoyl Peroxide] results in increased expression of PTGS2 mRNA	affects^cotreatment|increases^expression	15264312
2,2-dichloro-1,1,1-trifluoroethane	C067411	306-83-2	CYP2B6	1555	Homo sapiens	9606	CYP2B6 protein results in increased metabolism of 2,2-dichloro-1,1,1-trifluoroethane	increases^metabolic processing	11684365
2,2-dichloro-1,1,1-trifluoroethane	C067411	306-83-2	CYP2C19	1557	Homo sapiens	9606	CYP2C19 protein results in increased metabolism of 2,2-dichloro-1,1,1-trifluoroethane	increases^metabolic processing	11684365
2,2-dichloro-1,1,1-trifluoroethane	C067411	306-83-2	CYP2E1	1571	Homo sapiens	9606	CYP2E1 protein results in increased metabolism of 2,2-dichloro-1,1,1-trifluoroethane	increases^metabolic processing	11684365
22-hydroxycholesterol	C003585	17711-16-9	ABCA1	19	Homo sapiens	9606	22-hydroxycholesterol results in increased expression of ABCA1 mRNA	increases^expression	16142410|19426978|16730733
22-hydroxycholesterol	C003585	17711-16-9	ABCG1	9619	Homo sapiens	9606	22-hydroxycholesterol results in increased expression of ABCG1 mRNA	increases^expression	16730733
22-hydroxycholesterol	C003585	17711-16-9	CCL2	6347	Homo sapiens	9606	22-hydroxycholesterol results in increased expression of CCL2 mRNA	increases^expression	19426978
22-hydroxycholesterol	C003585	17711-16-9	CETP	1071	Homo sapiens	9606	22-hydroxycholesterol results in increased expression of CETP mRNA	increases^expression	16142410
22-hydroxycholesterol	C003585	17711-16-9	CXCL1	2919	Homo sapiens	9606	22-hydroxycholesterol results in increased expression of CXCL1 mRNA	increases^expression	19426978
22-hydroxycholesterol	C003585	17711-16-9	CXCL11	6373	Homo sapiens	9606	22-hydroxycholesterol results in increased expression of CXCL11 mRNA	increases^expression	19426978
22-hydroxycholesterol	C003585	17711-16-9	CXCL2	2920	Homo sapiens	9606	22-hydroxycholesterol results in increased expression of CXCL2 mRNA	increases^expression	19426978
22-hydroxycholesterol	C003585	17711-16-9	CXCR7	57007	Homo sapiens	9606	22-hydroxycholesterol results in increased expression of CXCR7 mRNA	increases^expression	19426978
22-hydroxycholesterol	C003585	17711-16-9	CYP51A1	1595	Homo sapiens	9606	22-hydroxycholesterol results in decreased expression of CYP51A1 mRNA	decreases^expression	19426978
22-hydroxycholesterol	C003585	17711-16-9	DHCR7	1717	Homo sapiens	9606	22-hydroxycholesterol results in decreased expression of DHCR7 mRNA	decreases^expression	19426978
22-hydroxycholesterol	C003585	17711-16-9	EGR1	1958	Homo sapiens	9606	22-hydroxycholesterol results in increased expression of EGR1 mRNA	increases^expression	19426978
22-hydroxycholesterol	C003585	17711-16-9	ESR1	2099	Homo sapiens	9606	22-hydroxycholesterol binds to and results in decreased activity of ESR1 protein	affects^binding|decreases^activity	17873880
22-hydroxycholesterol	C003585	17711-16-9	ESR2	2100	Homo sapiens	9606	22-hydroxycholesterol binds to and results in decreased activity of ESR2 protein	affects^binding|decreases^activity	17873880
22-hydroxycholesterol	C003585	17711-16-9	FDFT1	2222	Homo sapiens	9606	22-hydroxycholesterol results in decreased expression of FDFT1 mRNA	decreases^expression	19426978
22-hydroxycholesterol	C003585	17711-16-9	FOS	2353	Homo sapiens	9606	22-hydroxycholesterol results in increased expression of FOS mRNA	increases^expression	19426978
22-hydroxycholesterol	C003585	17711-16-9	HMGCR	3156	Homo sapiens	9606	22-hydroxycholesterol results in decreased expression of HMGCR mRNA	decreases^expression	19426978
22-hydroxycholesterol	C003585	17711-16-9	HMGCS1	3157	Homo sapiens	9606	22-hydroxycholesterol results in decreased expression of HMGCS1 mRNA	decreases^expression	19426978
22-hydroxycholesterol	C003585	17711-16-9	HMOX1	3162	Homo sapiens	9606	22-hydroxycholesterol results in increased expression of HMOX1 mRNA	increases^expression	19426978
22-hydroxycholesterol	C003585	17711-16-9	ICAM1	3383	Homo sapiens	9606	22-hydroxycholesterol promotes the reaction [Lipopolysaccharides results in increased expression of ICAM1 mRNA]	increases^expression|increases^reaction	19426978
22-hydroxycholesterol	C003585	17711-16-9	IDI1	3422	Homo sapiens	9606	22-hydroxycholesterol results in decreased expression of IDI1 mRNA	decreases^expression	19426978
22-hydroxycholesterol	C003585	17711-16-9	IFIT2	3433	Homo sapiens	9606	22-hydroxycholesterol results in increased expression of IFIT2 mRNA	increases^expression	19426978
22-hydroxycholesterol	C003585	17711-16-9	IL1A	3552	Homo sapiens	9606	22-hydroxycholesterol results in increased expression of IL1A mRNA	increases^expression	19426978
22-hydroxycholesterol	C003585	17711-16-9	IL8	3576	Homo sapiens	9606	22-hydroxycholesterol results in increased expression of IL8 mRNA	increases^expression	19426978
22-hydroxycholesterol	C003585	17711-16-9	LDLR	3949	Homo sapiens	9606	22-hydroxycholesterol results in decreased expression of LDLR mRNA	decreases^expression	16142410
22-hydroxycholesterol	C003585	17711-16-9	LPL	4023	Homo sapiens	9606	22-hydroxycholesterol results in increased expression of LPL mRNA	increases^expression	16142410
22-hydroxycholesterol	C003585	17711-16-9	LSS	4047	Homo sapiens	9606	22-hydroxycholesterol results in decreased expression of LSS mRNA	decreases^expression	19426978
22-hydroxycholesterol	C003585	17711-16-9	MAF	4094	Homo sapiens	9606	22-hydroxycholesterol results in increased expression of MAF mRNA	increases^expression	19426978
22-hydroxycholesterol	C003585	17711-16-9	MSMO1	6307	Homo sapiens	9606	22-hydroxycholesterol results in decreased expression of MSMO1 mRNA	decreases^expression	19426978
22-hydroxycholesterol	C003585	17711-16-9	MVD	4597	Homo sapiens	9606	22-hydroxycholesterol results in decreased expression of MVD mRNA	decreases^expression	19426978
22-hydroxycholesterol	C003585	17711-16-9	MVK	4598	Homo sapiens	9606	22-hydroxycholesterol results in decreased expression of MVK mRNA	decreases^expression	19426978
22-hydroxycholesterol	C003585	17711-16-9	NOS3	4846	Homo sapiens	9606	22-hydroxycholesterol results in decreased expression of NOS3 mRNA	decreases^expression	19426978
22-hydroxycholesterol	C003585	17711-16-9	NR1H2	7376	Homo sapiens	9606	[alitretinoin co-treated with 22-hydroxycholesterol] affects the localization of NR1H2 protein	affects^cotreatment|affects^localization	16888799
22-hydroxycholesterol	C003585	17711-16-9	NR1H3	10062	Homo sapiens	9606	22-hydroxycholesterol binds to and results in increased activity of NR1H3 protein	affects^binding|increases^activity	12932788
22-hydroxycholesterol	C003585	17711-16-9	NR5A1	2516	Homo sapiens	9606	22-hydroxycholesterol promotes the reaction [NR5A1 protein results in increased expression of STAR protein]	increases^expression|increases^reaction	9804848
22-hydroxycholesterol	C003585	17711-16-9	NSDHL	50814	Homo sapiens	9606	22-hydroxycholesterol results in decreased expression of NSDHL mRNA	decreases^expression	19426978
22-hydroxycholesterol	C003585	17711-16-9	PTGS2	5743	Homo sapiens	9606	22-hydroxycholesterol results in increased expression of PTGS2 mRNA	increases^expression	19426978
22-hydroxycholesterol	C003585	17711-16-9	SELE	6401	Homo sapiens	9606	22-hydroxycholesterol promotes the reaction [Lipopolysaccharides results in increased expression of SELE mRNA]	increases^expression|increases^reaction	19426978
22-hydroxycholesterol	C003585	17711-16-9	SQLE	6713	Homo sapiens	9606	22-hydroxycholesterol results in decreased expression of SQLE mRNA	decreases^expression	19426978
22-hydroxycholesterol	C003585	17711-16-9	STAR	6770	Homo sapiens	9606	22-hydroxycholesterol promotes the reaction [NR5A1 protein results in increased expression of STAR protein]	increases^expression|increases^reaction	9804848
22-hydroxycholesterol	C003585	17711-16-9	TNF	7124	Homo sapiens	9606	22-hydroxycholesterol promotes the reaction [TNF protein results in increased expression of ICAM1 mRNA]	increases^expression|increases^reaction	19426978
22-hydroxycholesterol	C003585	17711-16-9	TNFSF15	9966	Homo sapiens	9606	22-hydroxycholesterol results in increased expression of TNFSF15 mRNA	increases^expression	19426978
22-hydroxycholesterol	C003585	17711-16-9	VCAM1	7412	Homo sapiens	9606	22-hydroxycholesterol promotes the reaction [Lipopolysaccharides results in increased expression of VCAM1 mRNA]	increases^expression|increases^reaction	19426978
2-(2-hydroxyethylsulfanyl)-3-methyl-1,4-naphthoquinone	C446520		BAX	581	Homo sapiens	9606	2-(2-hydroxyethylsulfanyl)-3-methyl-1,4-naphthoquinone results in increased expression of BAX	increases^expression	16077967
2-(2-hydroxyethylsulfanyl)-3-methyl-1,4-naphthoquinone	C446520		BCL2	596	Homo sapiens	9606	2-(2-hydroxyethylsulfanyl)-3-methyl-1,4-naphthoquinone results in decreased expression of BCL2	decreases^expression	16077967
2-(2-hydroxyethylsulfanyl)-3-methyl-1,4-naphthoquinone	C446520		BCL2L1	598	Homo sapiens	9606	2-(2-hydroxyethylsulfanyl)-3-methyl-1,4-naphthoquinone results in decreased expression of BCL2L1	decreases^expression	16077967
2-(2-hydroxyethylsulfanyl)-3-methyl-1,4-naphthoquinone	C446520		CASP3	836	Homo sapiens	9606	2-(2-hydroxyethylsulfanyl)-3-methyl-1,4-naphthoquinone results in increased activity of CASP3 protein	increases^activity	16096431
2-(2-hydroxyethylsulfanyl)-3-methyl-1,4-naphthoquinone	C446520		CASP8	841	Homo sapiens	9606	2-(2-hydroxyethylsulfanyl)-3-methyl-1,4-naphthoquinone results in increased activity of CASP8 protein	increases^activity	16096431
2-(2-hydroxyethylsulfanyl)-3-methyl-1,4-naphthoquinone	C446520		CDC25A	993	Homo sapiens	9606	2-(2-hydroxyethylsulfanyl)-3-methyl-1,4-naphthoquinone results in decreased expression of CDC25A	decreases^expression	16077967
2-(2-hydroxyethylsulfanyl)-3-methyl-1,4-naphthoquinone	C446520		CDC25B	994	Homo sapiens	9606	2-(2-hydroxyethylsulfanyl)-3-methyl-1,4-naphthoquinone results in decreased expression of CDC25B	decreases^expression	16077967
2-(2-hydroxyethylsulfanyl)-3-methyl-1,4-naphthoquinone	C446520		CDC25C	995	Homo sapiens	9606	2-(2-hydroxyethylsulfanyl)-3-methyl-1,4-naphthoquinone results in decreased expression of CDC25C	decreases^expression	16077967
2-(2-hydroxyethylsulfanyl)-3-methyl-1,4-naphthoquinone	C446520		XIAP	331	Homo sapiens	9606	2-(2-hydroxyethylsulfanyl)-3-methyl-1,4-naphthoquinone results in decreased expression of XIAP protein	decreases^expression	16096431
2,2'-(hydroxynitrosohydrazono)bis-ethanamine	C094210	146724-94-9	CAV1	857	Homo sapiens	9606	2,2'-(hydroxynitrosohydrazono)bis-ethanamine results in decreased ubiquitination of and results in decreased degradation of CAV1 protein	decreases^degradation|decreases^ubiquitination	19706615
2,2'-(hydroxynitrosohydrazono)bis-ethanamine	C094210	146724-94-9	CDH2	1000	Homo sapiens	9606	2,2'-(hydroxynitrosohydrazono)bis-ethanamine results in increased expression of CDH2 mRNA	increases^expression	16580782
2,2'-(hydroxynitrosohydrazono)bis-ethanamine	C094210	146724-94-9	CTNNB1	1499	Homo sapiens	9606	2,2'-(hydroxynitrosohydrazono)bis-ethanamine results in increased expression of CTNNB1 mRNA	increases^expression	16580782
2,2'-(hydroxynitrosohydrazono)bis-ethanamine	C094210	146724-94-9	GFAP	2670	Homo sapiens	9606	2,2'-(hydroxynitrosohydrazono)bis-ethanamine results in decreased expression of GFAP mRNA	decreases^expression	16580782
2,2'-(hydroxynitrosohydrazono)bis-ethanamine	C094210	146724-94-9	ICAM1	3383	Homo sapiens	9606	2,2'-(hydroxynitrosohydrazono)bis-ethanamine inhibits the reaction [Fructose results in increased expression of ICAM1 protein]	decreases^reaction|increases^expression	18508964
2,2'-(hydroxynitrosohydrazono)bis-ethanamine	C094210	146724-94-9	NCF1	653361	Homo sapiens	9606	2,2'-(hydroxynitrosohydrazono)bis-ethanamine results in increased metabolism of NCF1 protein	increases^metabolic processing	17568572
2,2'-(hydroxynitrosohydrazono)bis-ethanamine	C094210	146724-94-9	NEUROG1	4762	Homo sapiens	9606	2,2'-(hydroxynitrosohydrazono)bis-ethanamine results in increased expression of NEUROG1 mRNA	increases^expression	16580782
2-(2-oxo-2-((3,7,11-trimethyl-2,6,10-dodecatrienyl)oxy)aminoethyl)phosphonic acid, (2,2-dimethyl-1-oxopropoxy)methyl ester sodium	C436083		FGF7	2252	Homo sapiens	9606	2-(2-oxo-2-((3,7,11-trimethyl-2,6,10-dodecatrienyl)oxy)aminoethyl)phosphonic acid, (2,2-dimethyl-1-oxopropoxy)methyl ester sodium inhibits the reaction [ammonium trichloro(dioxoethylene-O,O'-)tellurate results in increased expression of FGF7 protein]	decreases^reaction|increases^expression	14656992
2,2'-thiodiethanol	C047519	111-48-8	ADH1A	124	Homo sapiens	9606	ADH1A protein affects the metabolism of 2,2'-thiodiethanol	affects^metabolic processing	16417912
2,3,2-tetramine	C022177	4741-99-5	SOD2	6648	Homo sapiens	9606	2,3,2-tetramine results in increased expression of SOD2 protein	increases^expression	15388883
2,3,3',4,4',5-hexachlorobiphenyl	C087667	38380-08-4	AHR	196	Homo sapiens	9606	2,3,3',4,4',5-hexachlorobiphenyl results in increased activity of AHR protein	increases^activity	10448124
2,3,3',4,4',5-hexachlorobiphenyl	C087667	38380-08-4	CYP11B1	1584	Homo sapiens	9606	2,3,3',4,4',5-hexachlorobiphenyl results in increased expression of CYP11B1 mRNA	increases^expression	16396990
2,3,3',4,4',5-hexachlorobiphenyl	C087667	38380-08-4	CYP11B2	1585	Homo sapiens	9606	2,3,3',4,4',5-hexachlorobiphenyl results in increased expression of CYP11B2 mRNA	increases^expression	16396990
2,3,3',4,4',5-hexachlorobiphenyl	C087667	38380-08-4	CYP1A2	1544	Homo sapiens	9606	2,3,3',4,4',5-hexachlorobiphenyl inhibits the reaction [Tetrachlorodibenzodioxin results in increased activity of CYP1A2 protein]	decreases^reaction|increases^activity	18493746
2,3,3',4,4',5-hexachlorobiphenyl	C087667	38380-08-4	ESR1	2099	Homo sapiens	9606	2,3,3',4,4',5-hexachlorobiphenyl binds to ESR1 protein	affects^binding	16293362
2,3,3',4,4',5-hexachlorobiphenyl	C087667	38380-08-4	MAPK1	5594	Homo sapiens	9606	2,3,3',4,4',5-hexachlorobiphenyl binds to and results in increased activity of MAPK1 protein	affects^binding|increases^activity	16293362
2,3,3',4,4',5-hexachlorobiphenyl	C087667	38380-08-4	MAPK3	5595	Homo sapiens	9606	2,3,3',4,4',5-hexachlorobiphenyl binds to and results in increased activity of MAPK3 protein	affects^binding|increases^activity	16293362
2,3,3',4,4'-pentachlorobiphenyl	C067940	32598-14-4	AHR	196	Homo sapiens	9606	2,3,3',4,4'-pentachlorobiphenyl results in increased activity of AHR protein	increases^activity	10448124
2,3,3',4,4'-pentachlorobiphenyl	C067940	32598-14-4	CYP1A2	1544	Homo sapiens	9606	2,3,3',4,4'-pentachlorobiphenyl inhibits the reaction [Tetrachlorodibenzodioxin results in increased activity of CYP1A2 protein]	decreases^reaction|increases^activity	18493746
2,3',4,4',5-pentachlorobiphenyl	C070055	31508-00-6	AHR	196	Homo sapiens	9606	2,3',4,4',5-pentachlorobiphenyl results in increased activity of AHR protein	increases^activity	10448124
2,3',4,4',5-pentachlorobiphenyl	C070055	31508-00-6	CYP1A2	1544	Homo sapiens	9606	2,3',4,4',5-pentachlorobiphenyl inhibits the reaction [Tetrachlorodibenzodioxin results in increased activity of CYP1A2 protein]	decreases^reaction|increases^activity	18493746
2,3',4,4',5-pentachlorobiphenyl	C070055	31508-00-6	NR1I2	8856	Homo sapiens	9606	2,3',4,4',5-pentachlorobiphenyl binds to and results in increased activity of NR1I2 protein	affects^binding|increases^activity	16054614
2',3',4',5'-tetrachloro-4-biphenylol	C104006		CAMK4	814	Homo sapiens	9606	2',3',4',5'-tetrachloro-4-biphenylol inhibits the reaction [Diethylstilbestrol results in increased activity of CAMK4 protein]	decreases^reaction|increases^activity	16413991
2',3',4',5'-tetrachloro-4-biphenylol	C104006		ESR1	2099	Homo sapiens	9606	2',3',4',5'-tetrachloro-4-biphenylol binds to and results in increased activity of ESR1 protein	affects^binding|increases^activity	11530281
2',3',4',5'-tetrachloro-4-biphenylol	C104006		ESR2	2100	Homo sapiens	9606	2',3',4',5'-tetrachloro-4-biphenylol binds to ESR2 protein	affects^binding	10964929
2',3',4',5'-tetrachloro-4-biphenylol	C104006		NCOA1	8648	Homo sapiens	9606	2',3',4',5'-tetrachloro-4-biphenylol promotes the reaction [ESR2 protein binds to NCOA1 protein]	affects^binding|increases^reaction	10964929
2',3',4',5'-tetrachloro-4-biphenylol	C104006		NCOA2	10499	Homo sapiens	9606	2',3',4',5'-tetrachloro-4-biphenylol promotes the reaction [ESR2 protein binds to NCOA2 protein]	affects^binding|increases^reaction	10964929
2,3,4,7,8-pentachlorodibenzofuran	C038890	57117-31-4	AHR	196	Homo sapiens	9606	2,3,4,7,8-pentachlorodibenzofuran results in increased activity of AHR protein	increases^activity	11294989
2,3,4,7,8-pentachlorodibenzofuran	C038890	57117-31-4	ARNT	405	Homo sapiens	9606	2,3,4,7,8-pentachlorodibenzofuran results in increased activity of [AHR protein binds to ARNT protein]	affects^binding|increases^activity	11294989
2,3,4,7,8-pentachlorodibenzofuran	C038890	57117-31-4	CYP1A1	1543	Homo sapiens	9606	[2,3,4,7,8-pentachlorodibenzofuran results in increased activity of AHR protein] which results in increased expression of CYP1A1 protein	increases^activity|increases^expression	11294989
2,3,4,7,8-pentachlorodibenzofuran	C038890	57117-31-4	CYP1B1	1545	Homo sapiens	9606	2,3,4,7,8-pentachlorodibenzofuran results in increased expression of CYP1B1 mRNA	increases^expression	19358281
2,3,4,7,8-pentachlorodibenzofuran	C038890	57117-31-4	FGF9	2254	Homo sapiens	9606	2,3,4,7,8-pentachlorodibenzofuran results in increased expression of FGF9 mRNA	increases^expression	19358281
2,3,4,7,8-pentachlorodibenzofuran	C038890	57117-31-4	THRB	7068	Homo sapiens	9606	2,3,4,7,8-pentachlorodibenzofuran inhibits the reaction [Triiodothyronine results in increased expression of THRB mRNA]	decreases^reaction|increases^expression	18795168
2,3,5,6-tetrachlorohydroquinone	C044578	87-87-6	BCL2	596	Homo sapiens	9606	2,3,5,6-tetrachlorohydroquinone results in decreased expression of BCL2 protein	decreases^expression	11064002
2,3,5,6-tetrachlorohydroquinone	C044578	87-87-6	CSE1L	1434	Homo sapiens	9606	2,3,5,6-tetrachlorohydroquinone results in decreased expression of CSE1L protein	decreases^expression	11064002
2,3,5,6-tetrachlorophenate	C039673	935-95-5	CYP2E1	1571	Homo sapiens	9606	CYP2E1 protein results in increased oxidation of 2,3,5,6-tetrachlorophenate	increases^oxidation	7747284
(2,3,5,6-tetrafluoro-4-methoxymethylphenyl)methyl-2,2-dimethyl-3-(1-propenyl)cyclopropanecarboxylate	C492600		CYP2B6	1555	Homo sapiens	9606	(2,3,5,6-tetrafluoro-4-methoxymethylphenyl)methyl-2,2-dimethyl-3-(1-propenyl)cyclopropanecarboxylate results in increased expression of CYP2B6 mRNA	increases^expression	19378387
2-(((3,5-dichlorophenyl)carbamoyl)oxy)-2-methyl-3-butenoic acid	C101851	119209-27-7	AR	367	Homo sapiens	9606	2-(((3,5-dichlorophenyl)carbamoyl)oxy)-2-methyl-3-butenoic acid binds to and results in decreased activity of AR protein	affects^binding|decreases^activity	16417039|16750840
2-(((3,5-dichlorophenyl)carbamoyl)oxy)-2-methyl-3-butenoic acid	C101851	119209-27-7	ESR1	2099	Homo sapiens	9606	2-(((3,5-dichlorophenyl)carbamoyl)oxy)-2-methyl-3-butenoic acid binds to and results in increased activity of ESR1 protein	affects^binding|increases^activity	16750840
2-(((3,5-dichlorophenyl)carbamoyl)oxy)-2-methyl-3-butenoic acid	C101851	119209-27-7	ESR2	2100	Homo sapiens	9606	2-(((3,5-dichlorophenyl)carbamoyl)oxy)-2-methyl-3-butenoic acid binds to and results in increased activity of ESR2 protein	affects^binding|increases^activity	16750840
2,3,5-trichlorophenol	C056693	933-78-8	CYP2E1	1571	Homo sapiens	9606	CYP2E1 protein results in increased oxidation of 2,3,5-trichlorophenol	increases^oxidation	7747284
2,3,5-(triglutathion-S-yl)hydroquinone	C078765	119212-33-8	H2AFX	3014	Homo sapiens	9606	2,3,5-(triglutathion-S-yl)hydroquinone results in increased phosphorylation of H2AFX protein	increases^phosphorylation	21135414
2,3,5-(triglutathion-S-yl)hydroquinone	C078765	119212-33-8	MAPK1	5594	Homo sapiens	9606	2,3,5-(triglutathion-S-yl)hydroquinone results in increased phosphorylation of and results in increased activity of MAPK1 protein	increases^activity|increases^phosphorylation	21135414
2,3,5-(triglutathion-S-yl)hydroquinone	C078765	119212-33-8	MAPK3	5595	Homo sapiens	9606	2,3,5-(triglutathion-S-yl)hydroquinone results in increased phosphorylation of and results in increased activity of MAPK3 protein	increases^activity|increases^phosphorylation	21135414
2,3,5-(triglutathion-S-yl)hydroquinone	C078765	119212-33-8	MAPK8	5599	Homo sapiens	9606	2,3,5-(triglutathion-S-yl)hydroquinone results in increased phosphorylation of and results in increased activity of MAPK8 protein	increases^activity|increases^phosphorylation	21135414
2,3,5-(triglutathion-S-yl)hydroquinone	C078765	119212-33-8	MAPK9	5601	Homo sapiens	9606	2,3,5-(triglutathion-S-yl)hydroquinone results in increased phosphorylation of and results in increased activity of MAPK9 protein	increases^activity|increases^phosphorylation	21135414
2,3,5-trimethyl-6-(12-hydroxy-5,10-dodecadiynyl)-1,4-benzoquinone	C036837	80809-81-0	ALOX5	240	Homo sapiens	9606	2,3,5-trimethyl-6-(12-hydroxy-5,10-dodecadiynyl)-1,4-benzoquinone inhibits the reaction [ALOX5 protein promotes the reaction [Receptors, IgE results in increased abundance of Reactive Oxygen Species]]	decreases^reaction|increases^abundance|increases^reaction	17982097
2,3,5-trimethyl-6-(12-hydroxy-5,10-dodecadiynyl)-1,4-benzoquinone	C036837	80809-81-0	HSD11B2	3291	Homo sapiens	9606	[2,3,5-trimethyl-6-(12-hydroxy-5,10-dodecadiynyl)-1,4-benzoquinone co-treated with Leukotriene B4] results in decreased expression of HSD11B2 protein	affects^cotreatment|decreases^expression	18032417
2,3,5-trimethyl-6-(12-hydroxy-5,10-dodecadiynyl)-1,4-benzoquinone	C036837	80809-81-0	TNFRSF10B	8795	Homo sapiens	9606	2,3,5-trimethyl-6-(12-hydroxy-5,10-dodecadiynyl)-1,4-benzoquinone results in increased expression of TNFRSF10B protein	increases^expression	17645780
2,3,6,2',3',6'-hexachlorobiphenyl	C010498	38411-22-2	RYR1	6261	Homo sapiens	9606	[RYR1 protein co-treated with 2,3,6,2',3',6'-hexachlorobiphenyl] affects the susceptibility to Calcium	affects^cotreatment|affects^response to substance	18954145
2,3,6,7-tetrachlorobiphenylene	C516412		CYP1A1	1543	Homo sapiens	9606	2,3,6,7-tetrachlorobiphenylene results in increased activity of CYP1A1 protein	increases^activity	16759834
2,3,7,8-tetrachlorodibenzofuran	C014211	51207-31-9	AHR	196	Homo sapiens	9606	2,3,7,8-tetrachlorodibenzofuran binds to and results in increased activity of AHR protein	affects^binding|increases^activity	15001395
2,3,7,8-tetrachlorodibenzofuran	C014211	51207-31-9	ARNT	405	Homo sapiens	9606	2,3,7,8-tetrachlorodibenzofuran results in increased activity of [AHR protein binds to ARNT protein]	affects^binding|increases^activity	11294989
2,3-bis(2-hydroxyethylsulfanyl)-(1,4)naphthoquinone	C451261		CASP3	836	Homo sapiens	9606	2,3-bis(2-hydroxyethylsulfanyl)-(1,4)naphthoquinone results in increased activity of CASP3 protein	increases^activity	20150630
2,3-bis(3'-hydroxybenzyl)butane-1,4-diol	C029498	76543-16-3	CYP19A1	1588	Homo sapiens	9606	2,3-bis(3'-hydroxybenzyl)butane-1,4-diol results in decreased activity of CYP19A1 protein	decreases^activity	15876411
2,3-bis(3'-hydroxybenzyl)butane-1,4-diol	C029498	76543-16-3	VEGFA	7422	Homo sapiens	9606	2,3-bis(3'-hydroxybenzyl)butane-1,4-diol inhibits the reaction [Estradiol results in increased secretion of VEGFA protein]	decreases^reaction|increases^secretion	17289903
2,3-bis(3'-hydroxybenzyl)butyrolactone	C029497	76543-15-2	CYP19A1	1588	Homo sapiens	9606	2,3-bis(3'-hydroxybenzyl)butyrolactone results in decreased activity of CYP19A1 protein	decreases^activity	15876411
2,3-bis(3'-hydroxybenzyl)butyrolactone	C029497	76543-15-2	HSD17B1	3292	Homo sapiens	9606	2,3-bis(3'-hydroxybenzyl)butyrolactone results in decreased activity of HSD17B1 protein	decreases^activity	15876411
2,3-bis(3'-hydroxybenzyl)butyrolactone	C029497	76543-15-2	NR1I2	8856	Homo sapiens	9606	2,3-bis(3'-hydroxybenzyl)butyrolactone results in increased activity of NR1I2 protein	increases^activity	15885729
2,3-bis(3'-hydroxybenzyl)butyrolactone	C029497	76543-15-2	VEGFA	7422	Homo sapiens	9606	2,3-bis(3'-hydroxybenzyl)butyrolactone inhibits the reaction [Estradiol results in increased secretion of VEGFA protein]	decreases^reaction|increases^secretion	17289903
2,3-bis(4-hydroxyphenyl)-propionitrile	C486182		BCL2	596	Homo sapiens	9606	2,3-bis(4-hydroxyphenyl)-propionitrile results in increased expression of BCL2 mRNA	increases^expression	19264808
2,3-bis(4-hydroxyphenyl)-propionitrile	C486182		ESR1	2099	Homo sapiens	9606	ESR1 protein affects the reaction [2,3-bis(4-hydroxyphenyl)-propionitrile results in increased expression of BCL2 protein]	affects^reaction|increases^expression	19264808
2,3-bis(4-hydroxyphenyl)-propionitrile	C486182		ESR2	2100	Homo sapiens	9606	ESR2 protein affects the reaction [2,3-bis(4-hydroxyphenyl)-propionitrile results in increased expression of BCL2 mRNA]	affects^reaction|increases^expression	19264808
2,3-bis(4-hydroxyphenyl)-propionitrile	C486182		MIR21	406991	Homo sapiens	9606	2,3-bis(4-hydroxyphenyl)-propionitrile results in decreased expression of MIR21 mRNA	decreases^expression	19264808
2,3-bis(4-hydroxyphenyl)-propionitrile	C486182		PDCD4	27250	Homo sapiens	9606	2,3-bis(4-hydroxyphenyl)-propionitrile results in decreased expression of PDCD4 mRNA	decreases^expression	19264808
2,3-bis(4-hydroxyphenyl)-propionitrile	C486182		PTEN	5728	Homo sapiens	9606	2,3-bis(4-hydroxyphenyl)-propionitrile results in increased expression of PTEN protein	increases^expression	19264808
2,3-bis(palmitoyloxy)-2-propyl-N-palmitoyl-cysteinyl-seryl-seryl-asparaginyl-alanine	C038293	87173-03-3	CD40	958	Homo sapiens	9606	[2,3-bis(palmitoyloxy)-2-propyl-N-palmitoyl-cysteinyl-seryl-seryl-asparaginyl-alanine co-treated with Acetylmuramyl-Alanyl-Isoglutamine] results in increased expression of CD40 protein	affects^cotreatment|increases^expression	16299289
2,3-butylene glycol	C026978	513-85-9	ALDH2	217	Homo sapiens	9606	ALDH2 protein results in increased metabolism of 2,3-butylene glycol	increases^metabolic processing	10064379
2',3'-dideoxycytidine 5'-triphosphate	C037406	66004-77-1	DAP3	7818	Homo sapiens	9606	2',3'-dideoxycytidine 5'-triphosphate results in decreased expression of DAP3 protein	decreases^expression	16413536
2,3-dihydroxynaphthalene	C053499	92-44-4	COMT	1312	Homo sapiens	9606	COMT protein results in increased methylation of 2,3-dihydroxynaphthalene	increases^methylation	11160877
2,3-dimethoxy-1,4-naphthoquinone	C063002	6956-96-3	ACOT2	10965	Homo sapiens	9606	2,3-dimethoxy-1,4-naphthoquinone results in decreased expression of ACOT2 mRNA	decreases^expression	17547211
2,3-dimethoxy-1,4-naphthoquinone	C063002	6956-96-3	ACP2	53	Homo sapiens	9606	2,3-dimethoxy-1,4-naphthoquinone results in decreased expression of ACP2 mRNA	decreases^expression	17547211
2,3-dimethoxy-1,4-naphthoquinone	C063002	6956-96-3	ACSL1	2180	Homo sapiens	9606	2,3-dimethoxy-1,4-naphthoquinone results in decreased expression of ACSL1 mRNA	decreases^expression	17547211
2,3-dimethoxy-1,4-naphthoquinone	C063002	6956-96-3	ADH6	130	Homo sapiens	9606	2,3-dimethoxy-1,4-naphthoquinone results in decreased expression of ADH6 mRNA	decreases^expression	17547211
2,3-dimethoxy-1,4-naphthoquinone	C063002	6956-96-3	ADM	133	Homo sapiens	9606	2,3-dimethoxy-1,4-naphthoquinone results in increased expression of ADM mRNA	increases^expression	17547211
2,3-dimethoxy-1,4-naphthoquinone	C063002	6956-96-3	AKAP12	9590	Homo sapiens	9606	2,3-dimethoxy-1,4-naphthoquinone results in increased expression of AKAP12 mRNA	increases^expression	17547211
2,3-dimethoxy-1,4-naphthoquinone	C063002	6956-96-3	AKR1B1	231	Homo sapiens	9606	2,3-dimethoxy-1,4-naphthoquinone results in decreased expression of AKR1B1 mRNA	decreases^expression	17547211
2,3-dimethoxy-1,4-naphthoquinone	C063002	6956-96-3	AKR1C1	1645	Homo sapiens	9606	2,3-dimethoxy-1,4-naphthoquinone results in increased expression of AKR1C1 mRNA	increases^expression	9973208
2,3-dimethoxy-1,4-naphthoquinone	C063002	6956-96-3	ALDH6A1	4329	Homo sapiens	9606	2,3-dimethoxy-1,4-naphthoquinone results in decreased expression of ALDH6A1 mRNA	decreases^expression	17547211
2,3-dimethoxy-1,4-naphthoquinone	C063002	6956-96-3	ANXA2	302	Homo sapiens	9606	2,3-dimethoxy-1,4-naphthoquinone results in increased expression of ANXA2 mRNA	increases^expression	17547211
2,3-dimethoxy-1,4-naphthoquinone	C063002	6956-96-3	ARSE	415	Homo sapiens	9606	2,3-dimethoxy-1,4-naphthoquinone results in decreased expression of ARSE mRNA	decreases^expression	17547211
2,3-dimethoxy-1,4-naphthoquinone	C063002	6956-96-3	ASNS	440	Homo sapiens	9606	2,3-dimethoxy-1,4-naphthoquinone results in decreased expression of ASNS mRNA	decreases^expression	17547211
2,3-dimethoxy-1,4-naphthoquinone	C063002	6956-96-3	ATP2B1	490	Homo sapiens	9606	2,3-dimethoxy-1,4-naphthoquinone results in decreased expression of ATP2B1 mRNA	decreases^expression	17547211
2,3-dimethoxy-1,4-naphthoquinone	C063002	6956-96-3	AURKA	6790	Homo sapiens	9606	2,3-dimethoxy-1,4-naphthoquinone results in increased expression of AURKA mRNA	increases^expression	19031421
2,3-dimethoxy-1,4-naphthoquinone	C063002	6956-96-3	AZGP1	563	Homo sapiens	9606	2,3-dimethoxy-1,4-naphthoquinone results in decreased expression of AZGP1 mRNA	decreases^expression	17547211
2,3-dimethoxy-1,4-naphthoquinone	C063002	6956-96-3	BCAT1	586	Homo sapiens	9606	2,3-dimethoxy-1,4-naphthoquinone results in decreased expression of BCAT1 mRNA	decreases^expression	17547211
2,3-dimethoxy-1,4-naphthoquinone	C063002	6956-96-3	BHLHE40	8553	Homo sapiens	9606	2,3-dimethoxy-1,4-naphthoquinone results in increased expression of BHLHE40 mRNA	increases^expression	17547211
2,3-dimethoxy-1,4-naphthoquinone	C063002	6956-96-3	BIRC5	332	Homo sapiens	9606	2,3-dimethoxy-1,4-naphthoquinone results in increased expression of BIRC5 mRNA	increases^expression	19031421
2,3-dimethoxy-1,4-naphthoquinone	C063002	6956-96-3	BUB1B	701	Homo sapiens	9606	2,3-dimethoxy-1,4-naphthoquinone results in increased expression of BUB1B mRNA	increases^expression	19031421
2,3-dimethoxy-1,4-naphthoquinone	C063002	6956-96-3	C6ORF48	50854	Homo sapiens	9606	2,3-dimethoxy-1,4-naphthoquinone results in decreased expression of C6ORF48 mRNA	decreases^expression	17547211
2,3-dimethoxy-1,4-naphthoquinone	C063002	6956-96-3	CALR	811	Homo sapiens	9606	2,3-dimethoxy-1,4-naphthoquinone results in decreased expression of CALR mRNA	decreases^expression	17547211
2,3-dimethoxy-1,4-naphthoquinone	C063002	6956-96-3	CCNA2	890	Homo sapiens	9606	2,3-dimethoxy-1,4-naphthoquinone results in increased expression of CCNA2 mRNA	increases^expression	19031421
2,3-dimethoxy-1,4-naphthoquinone	C063002	6956-96-3	CCNB2	9133	Homo sapiens	9606	2,3-dimethoxy-1,4-naphthoquinone results in increased expression of CCNB2 mRNA	increases^expression	19031421|17547211
2,3-dimethoxy-1,4-naphthoquinone	C063002	6956-96-3	CDC20	991	Homo sapiens	9606	2,3-dimethoxy-1,4-naphthoquinone results in increased expression of CDC20 mRNA	increases^expression	19031421
2,3-dimethoxy-1,4-naphthoquinone	C063002	6956-96-3	CDC25B	994	Homo sapiens	9606	2,3-dimethoxy-1,4-naphthoquinone results in increased expression of CDC25B mRNA	increases^expression	19031421
2,3-dimethoxy-1,4-naphthoquinone	C063002	6956-96-3	CDH2	1000	Homo sapiens	9606	2,3-dimethoxy-1,4-naphthoquinone results in decreased expression of CDH2 mRNA	decreases^expression	17547211
2,3-dimethoxy-1,4-naphthoquinone	C063002	6956-96-3	CDKN3	1033	Homo sapiens	9606	2,3-dimethoxy-1,4-naphthoquinone results in increased expression of CDKN3 mRNA	increases^expression	17547211
2,3-dimethoxy-1,4-naphthoquinone	C063002	6956-96-3	CETN2	1069	Homo sapiens	9606	2,3-dimethoxy-1,4-naphthoquinone results in decreased expression of CETN2 mRNA	decreases^expression	19031421
2,3-dimethoxy-1,4-naphthoquinone	C063002	6956-96-3	CFB	629	Homo sapiens	9606	2,3-dimethoxy-1,4-naphthoquinone results in decreased expression of CFB mRNA	decreases^expression	17547211
2,3-dimethoxy-1,4-naphthoquinone	C063002	6956-96-3	CHPT1	56994	Homo sapiens	9606	2,3-dimethoxy-1,4-naphthoquinone results in decreased expression of CHPT1 mRNA	decreases^expression	19031421
2,3-dimethoxy-1,4-naphthoquinone	C063002	6956-96-3	CIDEB	27141	Homo sapiens	9606	2,3-dimethoxy-1,4-naphthoquinone results in decreased expression of CIDEB mRNA	decreases^expression	17547211
2,3-dimethoxy-1,4-naphthoquinone	C063002	6956-96-3	CKS2	1164	Homo sapiens	9606	2,3-dimethoxy-1,4-naphthoquinone results in increased expression of CKS2 mRNA	increases^expression	17547211|19031421
2,3-dimethoxy-1,4-naphthoquinone	C063002	6956-96-3	CLGN	1047	Homo sapiens	9606	2,3-dimethoxy-1,4-naphthoquinone results in decreased expression of CLGN mRNA	decreases^expression	17547211
2,3-dimethoxy-1,4-naphthoquinone	C063002	6956-96-3	CLPTM1	1209	Homo sapiens	9606	2,3-dimethoxy-1,4-naphthoquinone results in decreased expression of CLPTM1 mRNA	decreases^expression	17547211
2,3-dimethoxy-1,4-naphthoquinone	C063002	6956-96-3	CLU	1191	Homo sapiens	9606	2,3-dimethoxy-1,4-naphthoquinone results in decreased expression of CLU mRNA	decreases^expression	17547211
2,3-dimethoxy-1,4-naphthoquinone	C063002	6956-96-3	CRYAA	1409	Homo sapiens	9606	2,3-dimethoxy-1,4-naphthoquinone results in decreased expression of CRYAA mRNA	decreases^expression	19031421
2,3-dimethoxy-1,4-naphthoquinone	C063002	6956-96-3	CX3CL1	6376	Homo sapiens	9606	2,3-dimethoxy-1,4-naphthoquinone results in decreased expression of CX3CL1 mRNA	decreases^expression	17547211
2,3-dimethoxy-1,4-naphthoquinone	C063002	6956-96-3	CYP1A1	1543	Homo sapiens	9606	2,3-dimethoxy-1,4-naphthoquinone results in increased expression of CYP1A1 mRNA	increases^expression	9973208
2,3-dimethoxy-1,4-naphthoquinone	C063002	6956-96-3	DKK1	22943	Homo sapiens	9606	2,3-dimethoxy-1,4-naphthoquinone results in increased expression of DKK1 mRNA	increases^expression	17547211
2,3-dimethoxy-1,4-naphthoquinone	C063002	6956-96-3	DUSP13	51207	Homo sapiens	9606	2,3-dimethoxy-1,4-naphthoquinone results in increased expression of DUSP13 mRNA	increases^expression	19031421
2,3-dimethoxy-1,4-naphthoquinone	C063002	6956-96-3	EPHX1	2052	Homo sapiens	9606	2,3-dimethoxy-1,4-naphthoquinone results in decreased expression of EPHX1 mRNA	decreases^expression	17547211
2,3-dimethoxy-1,4-naphthoquinone	C063002	6956-96-3	F10	2159	Homo sapiens	9606	2,3-dimethoxy-1,4-naphthoquinone results in decreased expression of F10 mRNA	decreases^expression	17547211
2,3-dimethoxy-1,4-naphthoquinone	C063002	6956-96-3	F5	2153	Homo sapiens	9606	2,3-dimethoxy-1,4-naphthoquinone results in decreased expression of F5 mRNA	decreases^expression	17547211
2,3-dimethoxy-1,4-naphthoquinone	C063002	6956-96-3	FOSL1	8061	Homo sapiens	9606	2,3-dimethoxy-1,4-naphthoquinone results in increased expression of FOSL1 mRNA	increases^expression	17547211
2,3-dimethoxy-1,4-naphthoquinone	C063002	6956-96-3	FURIN	5045	Homo sapiens	9606	2,3-dimethoxy-1,4-naphthoquinone results in decreased expression of FURIN mRNA	decreases^expression	17547211
2,3-dimethoxy-1,4-naphthoquinone	C063002	6956-96-3	GGCX	2677	Homo sapiens	9606	2,3-dimethoxy-1,4-naphthoquinone results in decreased expression of GGCX mRNA	decreases^expression	17547211
2,3-dimethoxy-1,4-naphthoquinone	C063002	6956-96-3	GHITM	27069	Homo sapiens	9606	2,3-dimethoxy-1,4-naphthoquinone results in decreased expression of GHITM mRNA	decreases^expression	17547211
2,3-dimethoxy-1,4-naphthoquinone	C063002	6956-96-3	GLA	2717	Homo sapiens	9606	2,3-dimethoxy-1,4-naphthoquinone results in increased expression of GLA mRNA	increases^expression	17547211
2,3-dimethoxy-1,4-naphthoquinone	C063002	6956-96-3	GPR30	76854	Homo sapiens	9606	2,3-dimethoxy-1,4-naphthoquinone results in decreased expression of GPR30 mRNA	decreases^expression	17547211
2,3-dimethoxy-1,4-naphthoquinone	C063002	6956-96-3	GRB10	2887	Homo sapiens	9606	2,3-dimethoxy-1,4-naphthoquinone results in increased expression of GRB10 mRNA	increases^expression	17547211
2,3-dimethoxy-1,4-naphthoquinone	C063002	6956-96-3	GSN	2934	Homo sapiens	9606	2,3-dimethoxy-1,4-naphthoquinone results in decreased expression of GSN mRNA	decreases^expression	17547211
2,3-dimethoxy-1,4-naphthoquinone	C063002	6956-96-3	GTPBP6	8225	Homo sapiens	9606	2,3-dimethoxy-1,4-naphthoquinone results in increased expression of GTPBP6 mRNA	increases^expression	17547211
2,3-dimethoxy-1,4-naphthoquinone	C063002	6956-96-3	H2AFX	3014	Homo sapiens	9606	2,3-dimethoxy-1,4-naphthoquinone results in increased expression of H2AFX mRNA	increases^expression	19031421
2,3-dimethoxy-1,4-naphthoquinone	C063002	6956-96-3	HIST1H4C	8364	Homo sapiens	9606	2,3-dimethoxy-1,4-naphthoquinone results in increased expression of HIST1H4C mRNA	increases^expression	17547211
2,3-dimethoxy-1,4-naphthoquinone	C063002	6956-96-3	HMGA1	3159	Homo sapiens	9606	2,3-dimethoxy-1,4-naphthoquinone results in increased expression of HMGA1 mRNA	increases^expression	17547211
2,3-dimethoxy-1,4-naphthoquinone	C063002	6956-96-3	HMGN2	3151	Homo sapiens	9606	2,3-dimethoxy-1,4-naphthoquinone results in increased expression of HMGN2 mRNA	increases^expression	17547211
2,3-dimethoxy-1,4-naphthoquinone	C063002	6956-96-3	HMOX1	3162	Homo sapiens	9606	2,3-dimethoxy-1,4-naphthoquinone results in increased expression of HMOX1 mRNA	increases^expression	17547211
2,3-dimethoxy-1,4-naphthoquinone	C063002	6956-96-3	IER2	9592	Homo sapiens	9606	2,3-dimethoxy-1,4-naphthoquinone results in increased expression of IER2 mRNA	increases^expression	17547211
2,3-dimethoxy-1,4-naphthoquinone	C063002	6956-96-3	IFRD1	3475	Homo sapiens	9606	2,3-dimethoxy-1,4-naphthoquinone results in decreased expression of IFRD1 mRNA	decreases^expression	17547211
2,3-dimethoxy-1,4-naphthoquinone	C063002	6956-96-3	IGSF1	3547	Homo sapiens	9606	2,3-dimethoxy-1,4-naphthoquinone results in decreased expression of IGSF1 mRNA	decreases^expression	17547211
2,3-dimethoxy-1,4-naphthoquinone	C063002	6956-96-3	IL17RB	55540	Homo sapiens	9606	2,3-dimethoxy-1,4-naphthoquinone results in decreased expression of IL17RB mRNA	decreases^expression	17547211
2,3-dimethoxy-1,4-naphthoquinone	C063002	6956-96-3	ITGB3BP	23421	Homo sapiens	9606	2,3-dimethoxy-1,4-naphthoquinone results in increased expression of ITGB3BP mRNA	increases^expression	17547211
2,3-dimethoxy-1,4-naphthoquinone	C063002	6956-96-3	ITIH3	3699	Homo sapiens	9606	2,3-dimethoxy-1,4-naphthoquinone results in decreased expression of ITIH3 mRNA	decreases^expression	17547211
2,3-dimethoxy-1,4-naphthoquinone	C063002	6956-96-3	KIF20B	9585	Homo sapiens	9606	2,3-dimethoxy-1,4-naphthoquinone results in increased expression of KIF20B mRNA	increases^expression	19031421
2,3-dimethoxy-1,4-naphthoquinone	C063002	6956-96-3	KIF22	3835	Homo sapiens	9606	2,3-dimethoxy-1,4-naphthoquinone results in increased expression of KIF22 mRNA	increases^expression	19031421
2,3-dimethoxy-1,4-naphthoquinone	C063002	6956-96-3	KIF23	9493	Homo sapiens	9606	2,3-dimethoxy-1,4-naphthoquinone results in increased expression of KIF23 mRNA	increases^expression	19031421
2,3-dimethoxy-1,4-naphthoquinone	C063002	6956-96-3	KIF2C	11004	Homo sapiens	9606	2,3-dimethoxy-1,4-naphthoquinone results in increased expression of KIF2C mRNA	increases^expression	19031421
2,3-dimethoxy-1,4-naphthoquinone	C063002	6956-96-3	KRT19	3880	Homo sapiens	9606	2,3-dimethoxy-1,4-naphthoquinone results in increased expression of KRT19 mRNA	increases^expression	17547211
2,3-dimethoxy-1,4-naphthoquinone	C063002	6956-96-3	LGALS1	3956	Homo sapiens	9606	2,3-dimethoxy-1,4-naphthoquinone results in increased expression of LGALS1 mRNA	increases^expression	17547211
2,3-dimethoxy-1,4-naphthoquinone	C063002	6956-96-3	MAD2L1	4085	Homo sapiens	9606	2,3-dimethoxy-1,4-naphthoquinone results in increased expression of MAD2L1 mRNA	increases^expression	19031421
2,3-dimethoxy-1,4-naphthoquinone	C063002	6956-96-3	MAFF	23764	Homo sapiens	9606	2,3-dimethoxy-1,4-naphthoquinone results in increased expression of MAFF mRNA	increases^expression	17547211
2,3-dimethoxy-1,4-naphthoquinone	C063002	6956-96-3	MAPRE2	10982	Homo sapiens	9606	2,3-dimethoxy-1,4-naphthoquinone results in increased expression of MAPRE2 mRNA	increases^expression	19031421
2,3-dimethoxy-1,4-naphthoquinone	C063002	6956-96-3	MASK	50070	Homo sapiens	9606	2,3-dimethoxy-1,4-naphthoquinone results in decreased expression of MASK mRNA	decreases^expression	17547211
2,3-dimethoxy-1,4-naphthoquinone	C063002	6956-96-3	MCM2	4171	Homo sapiens	9606	2,3-dimethoxy-1,4-naphthoquinone results in increased expression of MCM2 mRNA	increases^expression	17547211
2,3-dimethoxy-1,4-naphthoquinone	C063002	6956-96-3	MGAT2	4247	Homo sapiens	9606	2,3-dimethoxy-1,4-naphthoquinone results in decreased expression of MGAT2 mRNA	decreases^expression	17547211
2,3-dimethoxy-1,4-naphthoquinone	C063002	6956-96-3	MXRA7	439921	Homo sapiens	9606	2,3-dimethoxy-1,4-naphthoquinone results in increased expression of MXRA7 mRNA	increases^expression	17547211
2,3-dimethoxy-1,4-naphthoquinone	C063002	6956-96-3	NCAPG	64151	Homo sapiens	9606	2,3-dimethoxy-1,4-naphthoquinone results in increased expression of NCAPG mRNA	increases^expression	19031421
2,3-dimethoxy-1,4-naphthoquinone	C063002	6956-96-3	NEDD9	4739	Homo sapiens	9606	2,3-dimethoxy-1,4-naphthoquinone results in decreased expression of NEDD9 mRNA	decreases^expression	19031421
2,3-dimethoxy-1,4-naphthoquinone	C063002	6956-96-3	NEK2	4751	Homo sapiens	9606	2,3-dimethoxy-1,4-naphthoquinone results in increased expression of NEK2 mRNA	increases^expression	19031421
2,3-dimethoxy-1,4-naphthoquinone	C063002	6956-96-3	NEK4	6787	Homo sapiens	9606	2,3-dimethoxy-1,4-naphthoquinone results in decreased expression of NEK4 mRNA	decreases^expression	19031421
2,3-dimethoxy-1,4-naphthoquinone	C063002	6956-96-3	NOLC1	9221	Homo sapiens	9606	2,3-dimethoxy-1,4-naphthoquinone results in increased expression of NOLC1 mRNA	increases^expression	19031421
2,3-dimethoxy-1,4-naphthoquinone	C063002	6956-96-3	NUCB2	4925	Homo sapiens	9606	2,3-dimethoxy-1,4-naphthoquinone results in decreased expression of NUCB2 mRNA	decreases^expression	17547211
2,3-dimethoxy-1,4-naphthoquinone	C063002	6956-96-3	NUP107	57122	Homo sapiens	9606	2,3-dimethoxy-1,4-naphthoquinone results in increased expression of NUP107 mRNA	increases^expression	17547211
2,3-dimethoxy-1,4-naphthoquinone	C063002	6956-96-3	NUSAP1	51203	Homo sapiens	9606	2,3-dimethoxy-1,4-naphthoquinone results in increased expression of NUSAP1 mRNA	increases^expression	19031421
2,3-dimethoxy-1,4-naphthoquinone	C063002	6956-96-3	OS9	10956	Homo sapiens	9606	2,3-dimethoxy-1,4-naphthoquinone results in decreased expression of OS9 mRNA	decreases^expression	17547211
2,3-dimethoxy-1,4-naphthoquinone	C063002	6956-96-3	PAK3	5063	Homo sapiens	9606	2,3-dimethoxy-1,4-naphthoquinone results in increased expression of PAK3 mRNA	increases^expression	19031421
2,3-dimethoxy-1,4-naphthoquinone	C063002	6956-96-3	PBK	55872	Homo sapiens	9606	2,3-dimethoxy-1,4-naphthoquinone results in increased expression of PBK mRNA	increases^expression	19031421
2,3-dimethoxy-1,4-naphthoquinone	C063002	6956-96-3	PGC	5225	Homo sapiens	9606	2,3-dimethoxy-1,4-naphthoquinone results in decreased expression of PGC mRNA	decreases^expression	17547211
2,3-dimethoxy-1,4-naphthoquinone	C063002	6956-96-3	PGF	5228	Homo sapiens	9606	2,3-dimethoxy-1,4-naphthoquinone results in decreased expression of PGF mRNA	decreases^expression	17547211
2,3-dimethoxy-1,4-naphthoquinone	C063002	6956-96-3	PLK1	5347	Homo sapiens	9606	2,3-dimethoxy-1,4-naphthoquinone results in increased expression of PLK1 mRNA	increases^expression	19031421
2,3-dimethoxy-1,4-naphthoquinone	C063002	6956-96-3	POLE2	5427	Homo sapiens	9606	2,3-dimethoxy-1,4-naphthoquinone results in increased expression of POLE2 mRNA	increases^expression	19031421
2,3-dimethoxy-1,4-naphthoquinone	C063002	6956-96-3	PPIH	10465	Homo sapiens	9606	2,3-dimethoxy-1,4-naphthoquinone results in increased expression of PPIH mRNA	increases^expression	17547211
2,3-dimethoxy-1,4-naphthoquinone	C063002	6956-96-3	PSPH	5723	Homo sapiens	9606	2,3-dimethoxy-1,4-naphthoquinone results in decreased expression of PSPH mRNA	decreases^expression	17547211
2,3-dimethoxy-1,4-naphthoquinone	C063002	6956-96-3	PTTG1	9232	Homo sapiens	9606	2,3-dimethoxy-1,4-naphthoquinone results in increased expression of PTTG1 mRNA	increases^expression	17547211
2,3-dimethoxy-1,4-naphthoquinone	C063002	6956-96-3	RACGAP1	29127	Homo sapiens	9606	2,3-dimethoxy-1,4-naphthoquinone results in increased expression of RACGAP1 mRNA	increases^expression	17547211
2,3-dimethoxy-1,4-naphthoquinone	C063002	6956-96-3	RAD23B	5887	Homo sapiens	9606	2,3-dimethoxy-1,4-naphthoquinone results in decreased expression of RAD23B mRNA	decreases^expression	19031421
2,3-dimethoxy-1,4-naphthoquinone	C063002	6956-96-3	RAD51C	5889	Homo sapiens	9606	2,3-dimethoxy-1,4-naphthoquinone results in increased expression of RAD51C mRNA	increases^expression	19031421
2,3-dimethoxy-1,4-naphthoquinone	C063002	6956-96-3	RBBP8	5932	Homo sapiens	9606	2,3-dimethoxy-1,4-naphthoquinone results in increased expression of RBBP8 mRNA	increases^expression	19031421
2,3-dimethoxy-1,4-naphthoquinone	C063002	6956-96-3	RBPMS	11030	Homo sapiens	9606	2,3-dimethoxy-1,4-naphthoquinone results in increased expression of RBPMS mRNA	increases^expression	17547211
2,3-dimethoxy-1,4-naphthoquinone	C063002	6956-96-3	RECQL	5965	Homo sapiens	9606	2,3-dimethoxy-1,4-naphthoquinone results in decreased expression of RECQL mRNA	decreases^expression	19031421
2,3-dimethoxy-1,4-naphthoquinone	C063002	6956-96-3	RFC2	5982	Homo sapiens	9606	2,3-dimethoxy-1,4-naphthoquinone results in increased expression of RFC2 mRNA	increases^expression	17547211
2,3-dimethoxy-1,4-naphthoquinone	C063002	6956-96-3	RFC4	5984	Homo sapiens	9606	2,3-dimethoxy-1,4-naphthoquinone results in increased expression of RFC4 mRNA	increases^expression	19031421
2,3-dimethoxy-1,4-naphthoquinone	C063002	6956-96-3	RNASEH2A	10535	Homo sapiens	9606	2,3-dimethoxy-1,4-naphthoquinone results in increased expression of RNASEH2A mRNA	increases^expression	17547211
2,3-dimethoxy-1,4-naphthoquinone	C063002	6956-96-3	RUVBL2	10856	Homo sapiens	9606	2,3-dimethoxy-1,4-naphthoquinone results in increased expression of RUVBL2 mRNA	increases^expression	19031421
2,3-dimethoxy-1,4-naphthoquinone	C063002	6956-96-3	SCD	6319	Homo sapiens	9606	2,3-dimethoxy-1,4-naphthoquinone results in decreased expression of SCD mRNA	decreases^expression	17547211
2,3-dimethoxy-1,4-naphthoquinone	C063002	6956-96-3	SERPINA5	5104	Homo sapiens	9606	2,3-dimethoxy-1,4-naphthoquinone results in decreased expression of SERPINA5 mRNA	decreases^expression	17547211
2,3-dimethoxy-1,4-naphthoquinone	C063002	6956-96-3	SERPINA6	866	Homo sapiens	9606	2,3-dimethoxy-1,4-naphthoquinone results in decreased expression of SERPINA6 mRNA	decreases^expression	17547211
2,3-dimethoxy-1,4-naphthoquinone	C063002	6956-96-3	SERPINB1	1992	Homo sapiens	9606	2,3-dimethoxy-1,4-naphthoquinone results in decreased expression of SERPINB1 mRNA	decreases^expression	17547211
2,3-dimethoxy-1,4-naphthoquinone	C063002	6956-96-3	SERPINC1	462	Homo sapiens	9606	2,3-dimethoxy-1,4-naphthoquinone results in decreased expression of SERPINC1 mRNA	decreases^expression	17547211
2,3-dimethoxy-1,4-naphthoquinone	C063002	6956-96-3	SFN	2810	Homo sapiens	9606	2,3-dimethoxy-1,4-naphthoquinone results in increased expression of SFN mRNA	increases^expression	17547211
2,3-dimethoxy-1,4-naphthoquinone	C063002	6956-96-3	SHC1	6464	Homo sapiens	9606	2,3-dimethoxy-1,4-naphthoquinone results in increased expression of SHC1 mRNA	increases^expression	19031421
2,3-dimethoxy-1,4-naphthoquinone	C063002	6956-96-3	SLC1A2	6506	Homo sapiens	9606	2,3-dimethoxy-1,4-naphthoquinone results in decreased expression of SLC1A2 mRNA	decreases^expression	17547211
2,3-dimethoxy-1,4-naphthoquinone	C063002	6956-96-3	SMC4	10051	Homo sapiens	9606	2,3-dimethoxy-1,4-naphthoquinone results in increased expression of SMC4 mRNA	increases^expression	17547211|19031421
2,3-dimethoxy-1,4-naphthoquinone	C063002	6956-96-3	SNRPA	6626	Homo sapiens	9606	2,3-dimethoxy-1,4-naphthoquinone results in increased expression of SNRPA mRNA	increases^expression	17547211
2,3-dimethoxy-1,4-naphthoquinone	C063002	6956-96-3	SPAG5	10615	Homo sapiens	9606	2,3-dimethoxy-1,4-naphthoquinone results in increased expression of SPAG5 mRNA	increases^expression	19031421
2,3-dimethoxy-1,4-naphthoquinone	C063002	6956-96-3	SPP1	6696	Homo sapiens	9606	2,3-dimethoxy-1,4-naphthoquinone results in increased expression of SPP1 mRNA	increases^expression	17547211
2,3-dimethoxy-1,4-naphthoquinone	C063002	6956-96-3	SQRDL	58472	Homo sapiens	9606	2,3-dimethoxy-1,4-naphthoquinone results in increased expression of SQRDL mRNA	increases^expression	17547211
2,3-dimethoxy-1,4-naphthoquinone	C063002	6956-96-3	SRSF2	6427	Homo sapiens	9606	2,3-dimethoxy-1,4-naphthoquinone results in increased expression of SRSF2 mRNA	increases^expression	17547211
2,3-dimethoxy-1,4-naphthoquinone	C063002	6956-96-3	SRSF7	6432	Homo sapiens	9606	2,3-dimethoxy-1,4-naphthoquinone results in increased expression of SRSF7 mRNA	increases^expression	17547211
2,3-dimethoxy-1,4-naphthoquinone	C063002	6956-96-3	ST6GALNAC4	27090	Homo sapiens	9606	2,3-dimethoxy-1,4-naphthoquinone results in decreased expression of ST6GALNAC4 mRNA	decreases^expression	17547211
2,3-dimethoxy-1,4-naphthoquinone	C063002	6956-96-3	TIMP1	7076	Homo sapiens	9606	2,3-dimethoxy-1,4-naphthoquinone results in increased expression of TIMP1 mRNA	increases^expression	17547211
2,3-dimethoxy-1,4-naphthoquinone	C063002	6956-96-3	TMED2	10959	Homo sapiens	9606	2,3-dimethoxy-1,4-naphthoquinone results in decreased expression of TMED2 mRNA	decreases^expression	17547211
2,3-dimethoxy-1,4-naphthoquinone	C063002	6956-96-3	TNFAIP3	7128	Homo sapiens	9606	2,3-dimethoxy-1,4-naphthoquinone results in increased expression of TNFAIP3 mRNA	increases^expression	17547211
2,3-dimethoxy-1,4-naphthoquinone	C063002	6956-96-3	TNFAIP8	25816	Homo sapiens	9606	2,3-dimethoxy-1,4-naphthoquinone results in increased expression of TNFAIP8 mRNA	increases^expression	17547211
2,3-dimethoxy-1,4-naphthoquinone	C063002	6956-96-3	TNFSF10	8743	Homo sapiens	9606	2,3-dimethoxy-1,4-naphthoquinone results in decreased expression of TNFSF10 mRNA	decreases^expression	17547211
2,3-dimethoxy-1,4-naphthoquinone	C063002	6956-96-3	TPX2	22974	Homo sapiens	9606	2,3-dimethoxy-1,4-naphthoquinone results in increased expression of TPX2 mRNA	increases^expression	19031421
2,3-dimethoxy-1,4-naphthoquinone	C063002	6956-96-3	TRIP13	9319	Homo sapiens	9606	2,3-dimethoxy-1,4-naphthoquinone results in increased expression of TRIP13 mRNA	increases^expression	17547211
2,3-dimethoxy-1,4-naphthoquinone	C063002	6956-96-3	TSPAN7	7102	Homo sapiens	9606	2,3-dimethoxy-1,4-naphthoquinone results in decreased expression of TSPAN7 mRNA	decreases^expression	17547211
2,3-dimethoxy-1,4-naphthoquinone	C063002	6956-96-3	TST	7263	Homo sapiens	9606	2,3-dimethoxy-1,4-naphthoquinone results in decreased expression of TST mRNA	decreases^expression	17547211
2,3-dimethoxy-1,4-naphthoquinone	C063002	6956-96-3	TUBA1A	7846	Homo sapiens	9606	2,3-dimethoxy-1,4-naphthoquinone results in increased expression of TUBA1A mRNA	increases^expression	17547211
2,3-dimethoxy-1,4-naphthoquinone	C063002	6956-96-3	TXNRD1	7296	Homo sapiens	9606	2,3-dimethoxy-1,4-naphthoquinone results in increased expression of TXNRD1 mRNA	increases^expression	17547211
2,3-dimethoxy-1,4-naphthoquinone	C063002	6956-96-3	TYMS	7298	Homo sapiens	9606	2,3-dimethoxy-1,4-naphthoquinone results in increased expression of TYMS mRNA	increases^expression	19031421|17547211
2,3-dimethoxy-1,4-naphthoquinone	C063002	6956-96-3	UBE2C	11065	Homo sapiens	9606	2,3-dimethoxy-1,4-naphthoquinone results in increased expression of UBE2C mRNA	increases^expression	17547211
2,3-dimethoxy-1,4-naphthoquinone	C063002	6956-96-3	UBE2V2	7336	Homo sapiens	9606	2,3-dimethoxy-1,4-naphthoquinone results in increased expression of UBE2V2 mRNA	increases^expression	19031421
2,3-dimethoxy-1,4-naphthoquinone	C063002	6956-96-3	VTN	7448	Homo sapiens	9606	2,3-dimethoxy-1,4-naphthoquinone results in decreased expression of VTN mRNA	decreases^expression	17547211
2,3-dimethoxy-1,4-naphthoquinone	C063002	6956-96-3	ZW10	9183	Homo sapiens	9606	2,3-dimethoxy-1,4-naphthoquinone results in increased expression of ZW10 mRNA	increases^expression	19031421
2,3-dimethoxy-1,4-naphthoquinone	C063002	6956-96-3	ZWINT	11130	Homo sapiens	9606	2,3-dimethoxy-1,4-naphthoquinone results in increased expression of ZWINT mRNA	increases^expression	19031421|17547211
2,3-dimethoxy-6,6-dimethyl-5,6-dihydrobenzo(7,8)indolizino (2,3-b)quinoxaline	C475470		IL5	3567	Homo sapiens	9606	2,3-dimethoxy-6,6-dimethyl-5,6-dihydrobenzo(7,8)indolizino (2,3-b)quinoxaline inhibits the reaction [IL5 protein binds to IL5RA protein]	affects^binding|decreases^reaction	15790522
2,3-dimethoxy-6,6-dimethyl-5,6-dihydrobenzo(7,8)indolizino (2,3-b)quinoxaline	C475470		IL5RA	3568	Homo sapiens	9606	2,3-dimethoxy-6,6-dimethyl-5,6-dihydrobenzo(7,8)indolizino (2,3-b)quinoxaline inhibits the reaction [IL5 protein binds to IL5RA protein]	affects^binding|decreases^reaction	15790522
2,3-dimethylhydroquinone	C516077		MPO	4353	Homo sapiens	9606	MPO protein results in increased oxidation of 2,3-dimethylhydroquinone	increases^oxidation	10994872
2,3-hexanedione	C043231	3848-24-6	AKR1A1	10327	Homo sapiens	9606	AKR1A1 protein results in increased reduction of 2,3-hexanedione	increases^reduction	10510318
2,3-hexanedione	C043231	3848-24-6	AKR1B1	231	Homo sapiens	9606	AKR1B1 protein results in increased reduction of 2,3-hexanedione	increases^reduction	10510318
2-(3-pyridinyl)-1-hydroxyethylidene-1,1-phosphonocarboxylic acid	C410028		RAB6A	5870	Homo sapiens	9606	2-(3-pyridinyl)-1-hydroxyethylidene-1,1-phosphonocarboxylic acid results in decreased prenylation of RAB6A protein	decreases^prenylation	16619218
2-(4-(2-(3,4-dichlorophenyl)ethyl)phenylamino)benzoic acid	C517140		KCNH2	3757	Homo sapiens	9606	2-(4-(2-(3,4-dichlorophenyl)ethyl)phenylamino)benzoic acid analog results in increased activity of KCNH2 protein	increases^activity	15976038
2,4,2',4'-tetrachlorobiphenyl	C035976	2437-79-8	GABRA1	2554	Homo sapiens	9606	2,4,2',4'-tetrachlorobiphenyl binds to and results in increased activity of [GABRA1 protein binds to GABRB2 protein binds to GABRG2 protein]	affects^binding|increases^activity	20819908
2,4,2',4'-tetrachlorobiphenyl	C035976	2437-79-8	GABRB2	2561	Homo sapiens	9606	2,4,2',4'-tetrachlorobiphenyl binds to and results in increased activity of [GABRA1 protein binds to GABRB2 protein binds to GABRG2 protein]	affects^binding|increases^activity	20819908
2,4,2',4'-tetrachlorobiphenyl	C035976	2437-79-8	GABRG2	2566	Homo sapiens	9606	2,4,2',4'-tetrachlorobiphenyl binds to and results in increased activity of [GABRA1 protein binds to GABRB2 protein binds to GABRG2 protein]	affects^binding|increases^activity	20819908
2,4,2',4'-tetrachlorobiphenyl	C035976	2437-79-8	MPO	4353	Homo sapiens	9606	2,4,2',4'-tetrachlorobiphenyl results in increased secretion of MPO protein	increases^secretion	15673847
2,4,2',4'-tetrachlorobiphenyl	C035976	2437-79-8	PTGS2	5743	Homo sapiens	9606	2,4,2',4'-tetrachlorobiphenyl results in increased expression of and results in increased activity of PTGS2 protein	increases^activity|increases^expression	15673847
24,25-epoxycholesterol	C028358	68138-65-8	ABCA1	19	Homo sapiens	9606	24,25-epoxycholesterol results in increased expression of ABCA1 mRNA	increases^expression	19426978
24,25-epoxycholesterol	C028358	68138-65-8	CD1A	909	Homo sapiens	9606	24,25-epoxycholesterol results in decreased expression of CD1A protein	decreases^expression	17475839
24,25-epoxycholesterol	C028358	68138-65-8	CD36	948	Homo sapiens	9606	24,25-epoxycholesterol results in decreased expression of CD36 protein	decreases^expression	17475839
24,25-epoxycholesterol	C028358	68138-65-8	CD80	941	Homo sapiens	9606	24,25-epoxycholesterol results in decreased expression of CD80 protein	decreases^expression	17475839
24,25-epoxycholesterol	C028358	68138-65-8	CD86	942	Homo sapiens	9606	24,25-epoxycholesterol results in increased expression of CD86 protein	increases^expression	17475839
24,25-epoxycholesterol	C028358	68138-65-8	ICAM1	3383	Homo sapiens	9606	24,25-epoxycholesterol promotes the reaction [Lipopolysaccharides results in increased expression of ICAM1 mRNA]	increases^expression|increases^reaction	19426978
24,25-epoxycholesterol	C028358	68138-65-8	IL8	3576	Homo sapiens	9606	24,25-epoxycholesterol results in increased expression of IL8 mRNA	increases^expression	19426978
24,25-epoxycholesterol	C028358	68138-65-8	NOS3	4846	Homo sapiens	9606	24,25-epoxycholesterol results in decreased expression of NOS3 mRNA	decreases^expression	19426978
24,25-epoxycholesterol	C028358	68138-65-8	NR1H3	10062	Homo sapiens	9606	NR1H3 protein promotes the reaction [24,25-epoxycholesterol results in increased abundance of Lipids]	increases^abundance|increases^reaction	20079722
24,25-epoxycholesterol	C028358	68138-65-8	SELE	6401	Homo sapiens	9606	24,25-epoxycholesterol promotes the reaction [Lipopolysaccharides results in increased expression of SELE mRNA]	increases^expression|increases^reaction	19426978
24,25-epoxycholesterol	C028358	68138-65-8	TNFSF15	9966	Homo sapiens	9606	24,25-epoxycholesterol results in increased expression of TNFSF15 mRNA	increases^expression	19426978
24,25-epoxycholesterol	C028358	68138-65-8	VCAM1	7412	Homo sapiens	9606	24,25-epoxycholesterol promotes the reaction [Lipopolysaccharides results in increased expression of VCAM1 mRNA]	increases^expression|increases^reaction	19426978
2-(4-(2-carboxyethyl)phenethylamino)-5'-N-ethylcarboxamidoadenosine	C061282	120225-54-9	MMP14	4323	Homo sapiens	9606	2-(4-(2-carboxyethyl)phenethylamino)-5'-N-ethylcarboxamidoadenosine results in decreased activity of MMP14 protein	decreases^activity	16783407
2-(4-(2-carboxyethyl)phenethylamino)-5'-N-ethylcarboxamidoadenosine	C061282	120225-54-9	MMP2	4313	Homo sapiens	9606	2-(4-(2-carboxyethyl)phenethylamino)-5'-N-ethylcarboxamidoadenosine results in decreased activity of MMP2 protein	decreases^activity	16783407
2-(4-(2-carboxyethyl)phenethylamino)-5'-N-ethylcarboxamidoadenosine	C061282	120225-54-9	MMP9	4318	Homo sapiens	9606	2-(4-(2-carboxyethyl)phenethylamino)-5'-N-ethylcarboxamidoadenosine results in decreased activity of MMP9 protein	decreases^activity	16783407
2,4,3',5'-tetramethoxystilbene	C440850		APP	351	Homo sapiens	9606	2,4,3',5'-tetramethoxystilbene results in decreased secretion of APP protein	decreases^secretion	16162502
2,4,3',5'-tetramethoxystilbene	C440850		AR	367	Homo sapiens	9606	2,4,3',5'-tetramethoxystilbene inhibits the reaction [Benzo(a)pyrene results in decreased expression of AR protein]	decreases^expression|decreases^reaction	15041469
2,4,3',5'-tetramethoxystilbene	C440850		CYP1B1	1545	Homo sapiens	9606	2,4,3',5'-tetramethoxystilbene inhibits the reaction [CYP1B1 protein results in increased hydroxylation of Melatonin]	decreases^reaction|increases^hydroxylation	15616152
2-(4-(4-chloro-1,2-diphenyl-but-1-enyl)phenoxy)ethanol	C119141		TNFRSF11B	4982	Homo sapiens	9606	2-(4-(4-chloro-1,2-diphenyl-but-1-enyl)phenoxy)ethanol results in increased expression of and results in increased secretion of TNFRSF11B protein	increases^expression|increases^secretion	17420779
2,4,4'-trichlorobiphenyl	C081766	7012-37-5	GABRA1	2554	Homo sapiens	9606	[2,4,4'-trichlorobiphenyl co-treated with gamma-Aminobutyric Acid] binds to and results in increased activity of [GABRA1 protein binds to GABRB2 protein binds to GABRG2 protein]	affects^binding|affects^cotreatment|increases^activity	20819908
2,4,4'-trichlorobiphenyl	C081766	7012-37-5	GABRB2	2561	Homo sapiens	9606	[2,4,4'-trichlorobiphenyl co-treated with gamma-Aminobutyric Acid] binds to and results in increased activity of [GABRA1 protein binds to GABRB2 protein binds to GABRG2 protein]	affects^binding|affects^cotreatment|increases^activity	20819908
2,4,4'-trichlorobiphenyl	C081766	7012-37-5	GABRG2	2566	Homo sapiens	9606	[2,4,4'-trichlorobiphenyl co-treated with gamma-Aminobutyric Acid] binds to and results in increased activity of [GABRA1 protein binds to GABRB2 protein binds to GABRG2 protein]	affects^binding|affects^cotreatment|increases^activity	20819908
2,4,5,2',4',5'-hexabromobiphenyl	C018566	59080-40-9	GJA1	2697	Homo sapiens	9606	[Dieldrin co-treated with 2,4,5,2',4',5'-hexabromobiphenyl] results in decreased expression of GJA1 protein	affects^cotreatment|decreases^expression	8820588
2,4,5,2',4',5'-hexachlorobiphenyl	C014024	35065-27-1	BRCA1	672	Homo sapiens	9606	2,4,5,2',4',5'-hexachlorobiphenyl inhibits the reaction [Estradiol results in increased expression of BRCA1 mRNA]	decreases^reaction|increases^expression	12473173
2,4,5,2',4',5'-hexachlorobiphenyl	C014024	35065-27-1	ESR1	2099	Homo sapiens	9606	2,4,5,2',4',5'-hexachlorobiphenyl binds to ESR1 protein	affects^binding	16293362
2,4,5,2',4',5'-hexachlorobiphenyl	C014024	35065-27-1	GABRA1	2554	Homo sapiens	9606	2,4,5,2',4',5'-hexachlorobiphenyl inhibits the reaction [2,4,2',4'-tetrachlorobiphenyl binds to and results in increased activity of [GABRA1 protein binds to GABRB2 protein binds to GABRG2 protein]]	affects^binding|decreases^reaction|increases^activity	20819908
2,4,5,2',4',5'-hexachlorobiphenyl	C014024	35065-27-1	GABRB2	2561	Homo sapiens	9606	2,4,5,2',4',5'-hexachlorobiphenyl inhibits the reaction [2,4,2',4'-tetrachlorobiphenyl binds to and results in increased activity of [GABRA1 protein binds to GABRB2 protein binds to GABRG2 protein]]	affects^binding|decreases^reaction|increases^activity	20819908
2,4,5,2',4',5'-hexachlorobiphenyl	C014024	35065-27-1	GABRG2	2566	Homo sapiens	9606	2,4,5,2',4',5'-hexachlorobiphenyl inhibits the reaction [2,4,2',4'-tetrachlorobiphenyl binds to and results in increased activity of [GABRA1 protein binds to GABRB2 protein binds to GABRG2 protein]]	affects^binding|decreases^reaction|increases^activity	20819908
2,4,5,2',4',5'-hexachlorobiphenyl	C014024	35065-27-1	GJA1	2697	Homo sapiens	9606	[DDT co-treated with 2,4,5,2',4',5'-hexachlorobiphenyl] results in decreased expression of GJA1 protein	affects^cotreatment|decreases^expression	8820588
2,4,5,2',4',5'-hexachlorobiphenyl	C014024	35065-27-1	IFNG	3458	Homo sapiens	9606	2,4,5,2',4',5'-hexachlorobiphenyl results in decreased expression of IFNG protein	decreases^expression	15319175
2,4,5,2',4',5'-hexachlorobiphenyl	C014024	35065-27-1	IL10	3586	Homo sapiens	9606	2,4,5,2',4',5'-hexachlorobiphenyl results in decreased expression of IL10 protein	decreases^expression	15319175
2,4,5,2',4',5'-hexachlorobiphenyl	C014024	35065-27-1	MAPK1	5594	Homo sapiens	9606	2,4,5,2',4',5'-hexachlorobiphenyl binds to and results in increased activity of MAPK1 protein	affects^binding|increases^activity	16293362
2,4,5,2',4',5'-hexachlorobiphenyl	C014024	35065-27-1	MAPK3	5595	Homo sapiens	9606	2,4,5,2',4',5'-hexachlorobiphenyl binds to and results in increased activity of MAPK3 protein	affects^binding|increases^activity	16293362
2,4,5,2',4',5'-hexachlorobiphenyl	C014024	35065-27-1	NR1I2	8856	Homo sapiens	9606	2,4,5,2',4',5'-hexachlorobiphenyl binds to and results in increased activity of NR1I2 protein	affects^binding|increases^activity	16054614
2,4,5,2',4',5'-hexachlorobiphenyl	C014024	35065-27-1	PARP1	142	Homo sapiens	9606	2,4,5,2',4',5'-hexachlorobiphenyl results in increased activity of PARP1 protein	increases^activity	16884709
2,4,5,2',4',5'-hexachlorobiphenyl	C014024	35065-27-1	TNF	7124	Homo sapiens	9606	2,4,5,2',4',5'-hexachlorobiphenyl results in decreased expression of TNF protein	decreases^expression	15319175
2,4,5,2',5'-pentachlorobiphenyl	C009828	37680-73-2	CYP11A1	1583	Homo sapiens	9606	2,4,5,2',5'-pentachlorobiphenyl metabolite results in increased expression of CYP11A1 mRNA	increases^expression	16216300
2,4,5,2',5'-pentachlorobiphenyl	C009828	37680-73-2	CYP11B1	1584	Homo sapiens	9606	2,4,5,2',5'-pentachlorobiphenyl metabolite inhibits the reaction [2,4,5,2',5'-pentachlorobiphenyl results in increased expression of CYP11B1 mRNA]	decreases^reaction|increases^expression	16216300
2,4,5,2',5'-pentachlorobiphenyl	C009828	37680-73-2	CYP11B2	1585	Homo sapiens	9606	2,4,5,2',5'-pentachlorobiphenyl metabolite results in increased expression of CYP11B2 mRNA	increases^expression	16216300
2,4,5,2',5'-pentachlorobiphenyl	C009828	37680-73-2	CYP19A1	1588	Homo sapiens	9606	2,4,5,2',5'-pentachlorobiphenyl metabolite results in increased expression of CYP19A1 mRNA	increases^expression	16216300
2,4,5,2',5'-pentachlorobiphenyl	C009828	37680-73-2	CYP21A2	1589	Homo sapiens	9606	2,4,5,2',5'-pentachlorobiphenyl metabolite results in increased expression of CYP21A2 mRNA	increases^expression	16216300
2,4,5,2',5'-pentachlorobiphenyl	C009828	37680-73-2	CYP2A6	1548	Homo sapiens	9606	CYP2A6 protein results in increased metabolism of 2,4,5,2',5'-pentachlorobiphenyl	increases^metabolic processing	16616008
2,4,5,2',5'-pentachlorobiphenyl	C009828	37680-73-2	HSD17B1	3292	Homo sapiens	9606	2,4,5,2',5'-pentachlorobiphenyl metabolite results in decreased expression of HSD17B1 mRNA	decreases^expression	16216300
2,4,5,2',5'-pentachlorobiphenyl	C009828	37680-73-2	HSD3B1	3283	Homo sapiens	9606	2,4,5,2',5'-pentachlorobiphenyl metabolite results in increased expression of HSD3B1 mRNA	increases^expression	16216300
2,4,5,2',5'-pentachlorobiphenyl	C009828	37680-73-2	HSD3B2	3284	Homo sapiens	9606	2,4,5,2',5'-pentachlorobiphenyl metabolite results in increased expression of HSD3B2 mRNA	increases^expression	16216300
2,4,5,2',5'-pentachlorobiphenyl	C009828	37680-73-2	NR1I2	8856	Homo sapiens	9606	2,4,5,2',5'-pentachlorobiphenyl binds to and results in increased activity of NR1I2 protein	affects^binding|increases^activity	20024649
2,4,5,2',5'-pentachlorobiphenyl	C009828	37680-73-2	STAR	6770	Homo sapiens	9606	2,4,5,2',5'-pentachlorobiphenyl metabolite results in decreased expression of STAR mRNA	decreases^expression	16216300
2-(4,5-dihydro-1,3-thiazol-2-ylthio)-1-(3,4-dihydroxyphenyl)ethanone	C529061		BBC3	27113	Homo sapiens	9606	TP53 protein mutant form affects the reaction [2-(4,5-dihydro-1,3-thiazol-2-ylthio)-1-(3,4-dihydroxyphenyl)ethanone results in increased expression of BBC3 mRNA]	affects^reaction|increases^expression	18424558
2-(4,5-dihydro-1,3-thiazol-2-ylthio)-1-(3,4-dihydroxyphenyl)ethanone	C529061		CDKN1A	1026	Homo sapiens	9606	TP53 protein mutant form affects the reaction [2-(4,5-dihydro-1,3-thiazol-2-ylthio)-1-(3,4-dihydroxyphenyl)ethanone results in increased expression of CDKN1A mRNA]	affects^reaction|increases^expression	18424558
2-(4,5-dihydro-1,3-thiazol-2-ylthio)-1-(3,4-dihydroxyphenyl)ethanone	C529061		TP53	7157	Homo sapiens	9606	2-(4,5-dihydro-1,3-thiazol-2-ylthio)-1-(3,4-dihydroxyphenyl)ethanone inhibits the reaction [TP53 protein mutant form binds to TP73 protein]	affects^binding|decreases^reaction	18424558
2-(4,5-dihydro-1,3-thiazol-2-ylthio)-1-(3,4-dihydroxyphenyl)ethanone	C529061		TP73	7161	Homo sapiens	9606	2-(4,5-dihydro-1,3-thiazol-2-ylthio)-1-(3,4-dihydroxyphenyl)ethanone inhibits the reaction [TP53 protein mutant form binds to TP73 protein]	affects^binding|decreases^reaction	18424558
2,4,5-trichlorophenol	C009534	95-95-4	CAT	847	Homo sapiens	9606	2,4,5-trichlorophenol results in decreased activity of CAT protein	decreases^activity	11023648
2,4,6-tribromoanisole	C484217		AHR	196	Homo sapiens	9606	2,4,6-tribromoanisole binds to AHR protein	affects^binding	15657799
2,4,6-tribromophenol	C004554	118-79-6	CYP19A1	1588	Homo sapiens	9606	2,4,6-tribromophenol results in increased activity of CYP19A1 protein	increases^activity	16177243
2,4,6-tribromophenol	C004554	118-79-6	TTR	7276	Homo sapiens	9606	2,4,6-tribromophenol binds to TTR protein	affects^binding	10869457
2,4,6-trichlorophenyl-4'-aminophenyl ether	C067259	26306-61-6	AR	367	Homo sapiens	9606	2,4,6-trichlorophenyl-4'-aminophenyl ether binds to AR protein	affects^binding	12676605
2,4,6-trichlorophenyl-4'-aminophenyl ether	C067259	26306-61-6	ESR1	2099	Homo sapiens	9606	2,4,6-trichlorophenyl-4'-aminophenyl ether binds to and results in increased activity of ESR1 protein	affects^binding|increases^activity	12676605
2,4,6-trichlorophenyl-4'-aminophenyl ether	C067259	26306-61-6	ESR2	2100	Homo sapiens	9606	2,4,6-trichlorophenyl-4'-aminophenyl ether results in increased activity of ESR2 protein	increases^activity	15064155
2,4,6-trichlorophenyl 4-nitrophenyl ether	C010422	1836-77-7	AR	367	Homo sapiens	9606	2,4,6-trichlorophenyl 4-nitrophenyl ether binds to and results in increased activity of AR protein	affects^binding|increases^activity	12676605
2,4,6-trichlorophenyl 4-nitrophenyl ether	C010422	1836-77-7	ESR1	2099	Homo sapiens	9606	2,4,6-trichlorophenyl 4-nitrophenyl ether binds to and results in increased activity of ESR1 protein	affects^binding|increases^activity	12676605
2,4,6-trichlorophenylhydrazine	C071044	5329-12-04	AR	367	Homo sapiens	9606	2,4,6-trichlorophenylhydrazine binds to and results in decreased activity of AR protein	affects^binding|decreases^activity	15950433
2-(4-amino-3-methylphenyl)-5-fluorobenzothiazole	C425784		AHR	196	Homo sapiens	9606	[2-(4-amino-3-methylphenyl)-5-fluorobenzothiazole binds to AHR protein] which results in increased activity of BRCA1 protein	affects^binding|increases^activity	18259752
2-(4-amino-3-methylphenyl)-5-fluorobenzothiazole	C425784		BRCA1	672	Homo sapiens	9606	[2-(4-amino-3-methylphenyl)-5-fluorobenzothiazole binds to AHR protein] which results in increased activity of BRCA1 protein	affects^binding|increases^activity	18259752
2-(4-amino-3-methylphenyl)-5-fluorobenzothiazole	C425784		CYP1A1	1543	Homo sapiens	9606	2-(4-amino-3-methylphenyl)-5-fluorobenzothiazole results in increased expression of CYP1A1 mRNA	increases^expression	14707267|15355884
2-(4-amino-3-methylphenyl)-5-fluorobenzothiazole	C425784		CYP1B1	1545	Homo sapiens	9606	2-(4-amino-3-methylphenyl)-5-fluorobenzothiazole results in increased expression of CYP1B1 mRNA	increases^expression	14707267|15355884
2-(4-amino-3-methylphenyl)-5-fluorobenzothiazole	C425784		IL6	3569	Homo sapiens	9606	2-(4-amino-3-methylphenyl)-5-fluorobenzothiazole results in increased expression of IL6 mRNA	increases^expression	15655410
2-(4-chloro-6-(2,3-dimethylphenylamino)pyrimidin-2-ylthio)octanoic acid	C548544		IL1B	3553	Homo sapiens	9606	2-(4-chloro-6-(2,3-dimethylphenylamino)pyrimidin-2-ylthio)octanoic acid inhibits the reaction [IL1B protein results in increased expression of PTGS2 protein]	decreases^reaction|increases^expression	19934399
2-(4-chloro-6-(2,3-dimethylphenylamino)pyrimidin-2-ylthio)octanoic acid	C548544		PPARA	5465	Homo sapiens	9606	2-(4-chloro-6-(2,3-dimethylphenylamino)pyrimidin-2-ylthio)octanoic acid binds to and results in increased activity of PPARA protein	affects^binding|increases^activity	19934399
2-(4-chloro-6-(2,3-dimethylphenylamino)pyrimidin-2-ylthio)octanoic acid	C548544		PPARG	5468	Homo sapiens	9606	2-(4-chloro-6-(2,3-dimethylphenylamino)pyrimidin-2-ylthio)octanoic acid binds to and results in increased activity of PPARG protein	affects^binding|increases^activity	19934399
2-(4-chloro-6-(2,3-dimethylphenylamino)pyrimidin-2-ylthio)octanoic acid	C548544		PTGES2	80142	Homo sapiens	9606	2-(4-chloro-6-(2,3-dimethylphenylamino)pyrimidin-2-ylthio)octanoic acid binds to and results in decreased activity of PTGES2 protein	affects^binding|decreases^activity	19934399
2-(4-chloro-6-(2,3-dimethylphenylamino)pyrimidin-2-ylthio)octanoic acid	C548544		PTGS2	5743	Homo sapiens	9606	2-(4-chloro-6-(2,3-dimethylphenylamino)pyrimidin-2-ylthio)octanoic acid inhibits the reaction [IL1B protein results in increased expression of PTGS2 protein]	decreases^reaction|increases^expression	19934399
2-(4-chlorophenoxy)propionic acid	C048213	3307-39-9	CLCN1	1180	Homo sapiens	9606	2-(4-chlorophenoxy)propionic acid affects the activity of CLCN1 protein	affects^activity	11408615|10953042
2,4-decadienal	C057349	2363-88-4	AKR1B1	231	Homo sapiens	9606	AKR1B1 protein results in increased reduction of 2,4-decadienal	increases^reduction	9890881
2,4-dibromophenol	C013930	615-58-7	TTR	7276	Homo sapiens	9606	2,4-dibromophenol binds to TTR protein	affects^binding	10869457
2',4'-dichlorobenzamil amiloride	C064515	90689-42-2	CTGF	1490	Homo sapiens	9606	2',4'-dichlorobenzamil amiloride inhibits the reaction [kallidin, des-Arg(10)- results in increased expression of CTGF mRNA]	decreases^reaction|increases^expression	15703175
2',4'-dichlorobenzamil amiloride	C064515	90689-42-2	TGFB1	7040	Homo sapiens	9606	2',4'-dichlorobenzamil amiloride inhibits the reaction [TGFB1 protein results in increased expression of CTGF mRNA]	decreases^reaction|increases^expression	15703175
2,4-dichlorophenol	C004762	120-83-2	AR	367	Homo sapiens	9606	2,4-dichlorophenol inhibits the reaction [Androgens binds to AR protein]	affects^binding|decreases^reaction	16107550
2,4-dichlorophenol	C004762	120-83-2	CAT	847	Homo sapiens	9606	2,4-dichlorophenol results in decreased activity of CAT protein	decreases^activity	11023648
2,4-dichlorophenol	C004762	120-83-2	RXRB	6257	Homo sapiens	9606	2,4-dichlorophenol results in increased activity of RXRB protein	increases^activity	18207673
2,4-dichlorophenoxyacetyl-S-acyl-CoA thioester	C473625		ALB	213	Homo sapiens	9606	2,4-dichlorophenoxyacetyl-S-acyl-CoA thioester binds to ALB protein	affects^binding	12649042
2,4-dihydroxybenzophenone	C121479	131-56-6	ESR1	2099	Homo sapiens	9606	2,4-dihydroxybenzophenone binds to and results in increased activity of ESR1 protein	affects^binding|increases^activity	16079615
2,4-dihydroxybenzophenone	C121479	131-56-6	ESR2	2100	Homo sapiens	9606	2,4-dihydroxybenzophenone binds to and results in increased activity of ESR2 protein	affects^binding|increases^activity	16079615
2,4-dihydroxybenzophenone	C121479	131-56-6	TFF1	7031	Homo sapiens	9606	2,4-dihydroxybenzophenone results in increased expression of TFF1 mRNA	increases^expression	16183391
2',4'-dihydroxychalcone	C059354	25515-43-9	UGT1A1	54658	Homo sapiens	9606	UGT1A1 protein results in increased glucuronidation of 2',4'-dihydroxychalcone	increases^glucuronidation	14557274
2',4'-dihydroxychalcone	C059354	25515-43-9	UGT1A10	54575	Homo sapiens	9606	UGT1A10 protein results in increased glucuronidation of 2',4'-dihydroxychalcone	increases^glucuronidation	14557274
2',4'-dihydroxychalcone	C059354	25515-43-9	UGT1A7	54577	Homo sapiens	9606	UGT1A7 protein results in increased glucuronidation of 2',4'-dihydroxychalcone	increases^glucuronidation	14557274
2',4'-dihydroxychalcone	C059354	25515-43-9	UGT1A8	54576	Homo sapiens	9606	UGT1A8 protein results in increased glucuronidation of 2',4'-dihydroxychalcone	increases^glucuronidation	14557274
2',4'-dihydroxychalcone	C059354	25515-43-9	UGT1A9	54600	Homo sapiens	9606	UGT1A9 protein results in increased glucuronidation of 2',4'-dihydroxychalcone	increases^glucuronidation	14557274
2,4-dinitrotoluene	C016403	121-14-2	DDIT3	1649	Homo sapiens	9606	2,4-dinitrotoluene results in increased expression of DDIT3 mRNA	increases^expression	11409192
2,4-dinitrotoluene	C016403	121-14-2	FOS	2353	Homo sapiens	9606	2,4-dinitrotoluene results in increased expression of FOS mRNA	increases^expression	11409192
2,4-dinitrotoluene	C016403	121-14-2	GADD45A	1647	Homo sapiens	9606	2,4-dinitrotoluene results in increased expression of GADD45A mRNA	increases^expression	11409192
2,4-dinitrotoluene	C016403	121-14-2	HSPA5	3309	Homo sapiens	9606	2,4-dinitrotoluene results in increased expression of HSPA5 mRNA	increases^expression	11409192
2,4-heptadienal	C502503		AKR1B1	231	Homo sapiens	9606	AKR1B1 protein results in increased reduction of 2,4-heptadienal	increases^reduction	9890881
2,4-hexadienal	C079389	80466-34-8	AKR1B1	231	Homo sapiens	9606	AKR1B1 protein results in increased reduction of 2,4-hexadienal	increases^reduction	9890881
24-hydroxycholesterol	C044563	474-73-7	ABCA1	19	Homo sapiens	9606	24-hydroxycholesterol results in increased expression of ABCA1 mRNA	increases^expression	15148325
24-hydroxycholesterol	C044563	474-73-7	ABCG1	9619	Homo sapiens	9606	24-hydroxycholesterol results in increased expression of ABCG1 protein	increases^expression	19126211
24-hydroxycholesterol	C044563	474-73-7	APP	351	Homo sapiens	9606	24-hydroxycholesterol affects the metabolism of and results in increased activity of APP protein	affects^metabolic processing|increases^activity	17532301
24-hydroxycholesterol	C044563	474-73-7	CYP27A1	1593	Homo sapiens	9606	CYP27A1 protein results in decreased abundance of 24-hydroxycholesterol	decreases^abundance	12119285
24-hydroxycholesterol	C044563	474-73-7	CYP46A1	10858	Homo sapiens	9606	CYP46A1 gene SNP affects the abundance of 24-hydroxycholesterol	affects^abundance	19286353
24-hydroxycholesterol	C044563	474-73-7	CYP7A1	1581	Homo sapiens	9606	CYP7A1 protein results in increased metabolism of 24-hydroxycholesterol	increases^metabolic processing	11013305
24-hydroxycholesterol	C044563	474-73-7	ESR1	2099	Homo sapiens	9606	24-hydroxycholesterol binds to and results in decreased activity of ESR1 protein	affects^binding|decreases^activity	17873880
24-hydroxycholesterol	C044563	474-73-7	ESR2	2100	Homo sapiens	9606	24-hydroxycholesterol binds to and results in decreased activity of ESR2 protein	affects^binding|decreases^activity	17873880
24-hydroxycholesterol	C044563	474-73-7	HMGCR	3156	Homo sapiens	9606	24-hydroxycholesterol results in decreased activity of HMGCR protein	decreases^activity	7751816
24-hydroxycholesterol	C044563	474-73-7	TH	7054	Homo sapiens	9606	24-hydroxycholesterol results in increased expression of and results in increased phosphorylation of TH protein	increases^expression|increases^phosphorylation	19014385
2-(4-hydroxyphenyl)-3-methyl-1-(4-(2-piperidin-1-yl-ethoxy)-benzyl)-1H-indol-5-ol	C439584		CCND1	595	Homo sapiens	9606	2-(4-hydroxyphenyl)-3-methyl-1-(4-(2-piperidin-1-yl-ethoxy)-benzyl)-1H-indol-5-ol results in decreased expression of CCND1 protein	decreases^expression	16954435
2-(4-hydroxyphenyl)-3-methyl-1-(4-(2-piperidin-1-yl-ethoxy)-benzyl)-1H-indol-5-ol	C439584		ESR1	2099	Homo sapiens	9606	2-(4-hydroxyphenyl)-3-methyl-1-(4-(2-piperidin-1-yl-ethoxy)-benzyl)-1H-indol-5-ol results in decreased expression of and results in decreased phosphorylation of and results in decreased activity of ESR1 protein	decreases^activity|decreases^expression|decreases^phosphorylation	16954435
2-(4-hydroxyphenyl)-3-methyl-1-(4-(2-piperidin-1-yl-ethoxy)-benzyl)-1H-indol-5-ol	C439584		RB1	5925	Homo sapiens	9606	2-(4-hydroxyphenyl)-3-methyl-1-(4-(2-piperidin-1-yl-ethoxy)-benzyl)-1H-indol-5-ol results in decreased phosphorylation of RB1 protein	decreases^phosphorylation	16954435
2-(4-hydroxyphenyl)-3-methyl-1-(4-(2-piperidin-1-yl-ethoxy)-benzyl)-1H-indol-5-ol	C439584		RPS6KB1	6198	Homo sapiens	9606	2-(4-hydroxyphenyl)-3-methyl-1-(4-(2-piperidin-1-yl-ethoxy)-benzyl)-1H-indol-5-ol results in decreased phosphorylation of RPS6KB1 protein	decreases^phosphorylation	16954435
2-(4-hydroxyphenyl)-3-phenylpent-2-enoic acid (4-(2-dimethylaminoethoxy)phenyl)amide	C553231		AKT1	207	Homo sapiens	9606	2-(4-hydroxyphenyl)-3-phenylpent-2-enoic acid (4-(2-dimethylaminoethoxy)phenyl)amide results in increased phosphorylation of AKT1 protein	increases^phosphorylation	19549922
2-(4-hydroxyphenyl)-3-phenylpent-2-enoic acid (4-(2-dimethylaminoethoxy)phenyl)amide	C553231		CYP19A1	1588	Homo sapiens	9606	2-(4-hydroxyphenyl)-3-phenylpent-2-enoic acid (4-(2-dimethylaminoethoxy)phenyl)amide results in increased expression of CYP19A1 mRNA	increases^expression	19549922
2-(4-hydroxyphenyl)-3-phenylpent-2-enoic acid (4-(2-dimethylaminoethoxy)phenyl)amide	C553231		GPR30	76854	Homo sapiens	9606	2-(4-hydroxyphenyl)-3-phenylpent-2-enoic acid (4-(2-dimethylaminoethoxy)phenyl)amide results in increased activity of GPR30 protein	increases^activity	19549922
2-(4-hydroxyphenyl)-3-phenylpent-2-enoic acid (4-(2-dimethylaminoethoxy)phenyl)amide	C553231		MAPK1	5594	Homo sapiens	9606	2-(4-hydroxyphenyl)-3-phenylpent-2-enoic acid (4-(2-dimethylaminoethoxy)phenyl)amide results in increased phosphorylation of MAPK1 protein	increases^phosphorylation	19549922
2-(4-hydroxyphenyl)-3-phenylpent-2-enoic acid (4-(2-dimethylaminoethoxy)phenyl)amide	C553231		MAPK3	5595	Homo sapiens	9606	2-(4-hydroxyphenyl)-3-phenylpent-2-enoic acid (4-(2-dimethylaminoethoxy)phenyl)amide results in increased phosphorylation of MAPK3 protein	increases^phosphorylation	19549922
2-(4-hydroxyphenyl)-3-phenylpent-2-enoic acid (4-(2-dimethylaminoethoxy)phenyl)amide	C553231		NR5A1	2516	Homo sapiens	9606	2-(4-hydroxyphenyl)-3-phenylpent-2-enoic acid (4-(2-dimethylaminoethoxy)phenyl)amide results in increased activity of NR5A1 protein	increases^activity	19549922
2-(4-isobutylphenyl)propionylmethanesulfonamide	C490707		CEACAM8	1088	Homo sapiens	9606	2-(4-isobutylphenyl)propionylmethanesulfonamide inhibits the reaction [IL8 protein results in increased expression of CEACAM8 protein]	decreases^reaction|increases^expression	15652230
2-(4-isobutylphenyl)propionylmethanesulfonamide	C490707		CXCR1	3577	Homo sapiens	9606	2-(4-isobutylphenyl)propionylmethanesulfonamide binds to and results in decreased activity of CXCR1 protein	affects^binding|decreases^activity	15282370|15652230
2-(4-isobutylphenyl)propionylmethanesulfonamide	C490707		CXCR2	3579	Homo sapiens	9606	2-(4-isobutylphenyl)propionylmethanesulfonamide binds to and results in decreased activity of CXCR2 protein	affects^binding|decreases^activity	15652230
2-(4-isobutylphenyl)propionylmethanesulfonamide	C490707		IL1B	3553	Homo sapiens	9606	2-(4-isobutylphenyl)propionylmethanesulfonamide inhibits the reaction [IL8 protein results in increased expression of IL1B mRNA]	decreases^reaction|increases^expression	15652230
2-(4-isobutylphenyl)propionylmethanesulfonamide	C490707		IL8	3576	Homo sapiens	9606	2-(4-isobutylphenyl)propionylmethanesulfonamide inhibits the reaction [IL8 protein results in increased expression of CEACAM8 protein]	decreases^reaction|increases^expression	15652230
2-(4-isobutylphenyl)propionylmethanesulfonamide	C490707		ITGAM	3684	Homo sapiens	9606	2-(4-isobutylphenyl)propionylmethanesulfonamide inhibits the reaction [IL8 protein results in increased expression of ITGAM protein]	decreases^reaction|increases^expression	15652230
2-(4-isobutylphenyl)propionylmethanesulfonamide	C490707		MMP9	4318	Homo sapiens	9606	2-(4-isobutylphenyl)propionylmethanesulfonamide inhibits the reaction [IL8 protein results in increased secretion of MMP9 protein]	decreases^reaction|increases^secretion	15652230
2-(4-morpholinyl)-8-phenyl-4H-1-benzopyran-4-one	C085911	154447-36-6	ABCC2	1244	Homo sapiens	9606	2-(4-morpholinyl)-8-phenyl-4H-1-benzopyran-4-one inhibits the reaction [erucin results in increased expression of ABCC2 mRNA]	decreases^reaction|increases^expression	15896333
2-(4-morpholinyl)-8-phenyl-4H-1-benzopyran-4-one	C085911	154447-36-6	ABCG2	9429	Homo sapiens	9606	2-(4-morpholinyl)-8-phenyl-4H-1-benzopyran-4-one inhibits the reaction [ERBB2 results in increased expression of ABCG2 mRNA]	decreases^reaction|increases^expression	21712253
2-(4-morpholinyl)-8-phenyl-4H-1-benzopyran-4-one	C085911	154447-36-6	ABL1	25	Homo sapiens	9606	2-(4-morpholinyl)-8-phenyl-4H-1-benzopyran-4-one inhibits the reaction [[BCR protein mutant form binds to ABL1 protein mutant form] which results in increased chemical synthesis of Histamine]	affects^binding|decreases^reaction|increases^chemical synthesis	16849647
2-(4-morpholinyl)-8-phenyl-4H-1-benzopyran-4-one	C085911	154447-36-6	AKT1	207	Homo sapiens	9606	2-(4-morpholinyl)-8-phenyl-4H-1-benzopyran-4-one inhibits the reaction [4-(3-(2-propyl-3-hydroxy-4-acetyl)phenoxy)propyloxyphenoxy acetic acid results in increased phosphorylation of AKT1 protein]	decreases^reaction|increases^phosphorylation	19906781
2-(4-morpholinyl)-8-phenyl-4H-1-benzopyran-4-one	C085911	154447-36-6	ANGPT1	284	Homo sapiens	9606	2-(4-morpholinyl)-8-phenyl-4H-1-benzopyran-4-one inhibits the reaction [ANGPT1 protein inhibits the reaction [Doxorubicin results in increased expression of TP53 protein]]	decreases^reaction|increases^expression	15763944
2-(4-morpholinyl)-8-phenyl-4H-1-benzopyran-4-one	C085911	154447-36-6	APP	351	Homo sapiens	9606	2-(4-morpholinyl)-8-phenyl-4H-1-benzopyran-4-one inhibits the reaction [[Clioquinol co-treated with Copper] results in decreased expression of APP protein alternative form]	affects^cotreatment|decreases^expression|decreases^reaction	16648635
2-(4-morpholinyl)-8-phenyl-4H-1-benzopyran-4-one	C085911	154447-36-6	AQP3	360	Homo sapiens	9606	2-(4-morpholinyl)-8-phenyl-4H-1-benzopyran-4-one inhibits the reaction [EGF protein results in increased expression of AQP3 protein]	decreases^reaction|increases^expression	16848764|18214481
2-(4-morpholinyl)-8-phenyl-4H-1-benzopyran-4-one	C085911	154447-36-6	AR	367	Homo sapiens	9606	2-(4-morpholinyl)-8-phenyl-4H-1-benzopyran-4-one inhibits the reaction [Capsaicin results in increased expression of AR protein]	decreases^reaction|increases^expression	19059400
2-(4-morpholinyl)-8-phenyl-4H-1-benzopyran-4-one	C085911	154447-36-6	BAD	572	Homo sapiens	9606	2-(4-morpholinyl)-8-phenyl-4H-1-benzopyran-4-one inhibits the reaction [Acrolein results in increased phosphorylation of BAD protein]	decreases^reaction|increases^phosphorylation	19596284
2-(4-morpholinyl)-8-phenyl-4H-1-benzopyran-4-one	C085911	154447-36-6	BAX	581	Homo sapiens	9606	2-(4-morpholinyl)-8-phenyl-4H-1-benzopyran-4-one affects the localization of BAX protein	affects^localization	15942663
2-(4-morpholinyl)-8-phenyl-4H-1-benzopyran-4-one	C085911	154447-36-6	BCL2	596	Homo sapiens	9606	2-(4-morpholinyl)-8-phenyl-4H-1-benzopyran-4-one results in decreased expression of BCL2 protein	decreases^expression	21130731
2-(4-morpholinyl)-8-phenyl-4H-1-benzopyran-4-one	C085911	154447-36-6	BCL2L1	598	Homo sapiens	9606	2-(4-morpholinyl)-8-phenyl-4H-1-benzopyran-4-one inhibits the reaction [Lipopolysaccharides results in increased expression of BCL2L1 protein]	decreases^reaction|increases^expression	18789402
2-(4-morpholinyl)-8-phenyl-4H-1-benzopyran-4-one	C085911	154447-36-6	BCR	613	Homo sapiens	9606	2-(4-morpholinyl)-8-phenyl-4H-1-benzopyran-4-one inhibits the reaction [[BCR protein mutant form binds to ABL1 protein mutant form] which results in increased chemical synthesis of Histamine]	affects^binding|decreases^reaction|increases^chemical synthesis	16849647
2-(4-morpholinyl)-8-phenyl-4H-1-benzopyran-4-one	C085911	154447-36-6	BDNF	627	Homo sapiens	9606	2-(4-morpholinyl)-8-phenyl-4H-1-benzopyran-4-one inhibits the reaction [BDNF protein results in increased chemical synthesis of Nitric Oxide]	decreases^reaction|increases^chemical synthesis	17172126
2-(4-morpholinyl)-8-phenyl-4H-1-benzopyran-4-one	C085911	154447-36-6	BIRC2	329	Homo sapiens	9606	2-(4-morpholinyl)-8-phenyl-4H-1-benzopyran-4-one inhibits the reaction [Acrolein results in increased expression of BIRC2 protein]	decreases^reaction|increases^expression	19596284
2-(4-morpholinyl)-8-phenyl-4H-1-benzopyran-4-one	C085911	154447-36-6	BIRC3	330	Homo sapiens	9606	2-(4-morpholinyl)-8-phenyl-4H-1-benzopyran-4-one inhibits the reaction [Acrolein results in increased expression of BIRC3 protein]	decreases^reaction|increases^expression	19596284
2-(4-morpholinyl)-8-phenyl-4H-1-benzopyran-4-one	C085911	154447-36-6	BIRC5	332	Homo sapiens	9606	2-(4-morpholinyl)-8-phenyl-4H-1-benzopyran-4-one inhibits the reaction [CALCA protein results in increased expression of BIRC5 protein]	decreases^reaction|increases^expression	16222118
2-(4-morpholinyl)-8-phenyl-4H-1-benzopyran-4-one	C085911	154447-36-6	CALCA	796	Homo sapiens	9606	2-(4-morpholinyl)-8-phenyl-4H-1-benzopyran-4-one inhibits the reaction [CALCA protein results in decreased susceptibility to Etoposide]	decreases^reaction|decreases^response to substance	16222118
2-(4-morpholinyl)-8-phenyl-4H-1-benzopyran-4-one	C085911	154447-36-6	CASP3	836	Homo sapiens	9606	2-(4-morpholinyl)-8-phenyl-4H-1-benzopyran-4-one affects the reaction [Indomethacin results in increased activity of CASP3 protein]	affects^reaction|increases^activity	17341418
2-(4-morpholinyl)-8-phenyl-4H-1-benzopyran-4-one	C085911	154447-36-6	CASP6	839	Homo sapiens	9606	2-(4-morpholinyl)-8-phenyl-4H-1-benzopyran-4-one affects the reaction [Indomethacin results in increased activity of CASP6 protein]	affects^reaction|increases^activity	17341418
2-(4-morpholinyl)-8-phenyl-4H-1-benzopyran-4-one	C085911	154447-36-6	CASP8	841	Homo sapiens	9606	[2-(4-morpholinyl)-8-phenyl-4H-1-benzopyran-4-one co-treated with fludarabine] results in increased cleavage of CASP8 protein	affects^cotreatment|increases^cleavage	15850772
2-(4-morpholinyl)-8-phenyl-4H-1-benzopyran-4-one	C085911	154447-36-6	CASP9	842	Homo sapiens	9606	2-(4-morpholinyl)-8-phenyl-4H-1-benzopyran-4-one affects the reaction [Indomethacin results in increased activity of CASP9 protein]	affects^reaction|increases^activity	17341418
2-(4-morpholinyl)-8-phenyl-4H-1-benzopyran-4-one	C085911	154447-36-6	CCL11	6356	Homo sapiens	9606	2-(4-morpholinyl)-8-phenyl-4H-1-benzopyran-4-one inhibits the reaction [CCL11 protein results in increased expression of ITGAM protein]	decreases^reaction|increases^expression	11980903
2-(4-morpholinyl)-8-phenyl-4H-1-benzopyran-4-one	C085911	154447-36-6	CCL2	6347	Homo sapiens	9606	2-(4-morpholinyl)-8-phenyl-4H-1-benzopyran-4-one inhibits the reaction [Digitoxin inhibits the reaction [IL1B protein results in increased expression of CCL2 protein]]	decreases^reaction|increases^expression	19446813
2-(4-morpholinyl)-8-phenyl-4H-1-benzopyran-4-one	C085911	154447-36-6	CCNA2	890	Homo sapiens	9606	2-(4-morpholinyl)-8-phenyl-4H-1-benzopyran-4-one results in decreased expression of CCNA2 protein	decreases^expression	17148679
2-(4-morpholinyl)-8-phenyl-4H-1-benzopyran-4-one	C085911	154447-36-6	CCND1	595	Homo sapiens	9606	2-(4-morpholinyl)-8-phenyl-4H-1-benzopyran-4-one inhibits the reaction [Sirolimus results in increased expression of CCND1 protein]	decreases^reaction|increases^expression	19661225
2-(4-morpholinyl)-8-phenyl-4H-1-benzopyran-4-one	C085911	154447-36-6	CCND2	894	Homo sapiens	9606	2-(4-morpholinyl)-8-phenyl-4H-1-benzopyran-4-one inhibits the reaction [IL2 protein results in increased expression of CCND2 mRNA]	decreases^reaction|increases^expression	15778701
2-(4-morpholinyl)-8-phenyl-4H-1-benzopyran-4-one	C085911	154447-36-6	CCND3	896	Homo sapiens	9606	2-(4-morpholinyl)-8-phenyl-4H-1-benzopyran-4-one inhibits the reaction [IL2 protein results in increased expression of CCND3 mRNA]	decreases^reaction|increases^expression	15778701
2-(4-morpholinyl)-8-phenyl-4H-1-benzopyran-4-one	C085911	154447-36-6	CCNE1	898	Homo sapiens	9606	2-(4-morpholinyl)-8-phenyl-4H-1-benzopyran-4-one results in decreased expression of CCNE1 protein	decreases^expression	14757120
2-(4-morpholinyl)-8-phenyl-4H-1-benzopyran-4-one	C085911	154447-36-6	CDKN1A	1026	Homo sapiens	9606	2-(4-morpholinyl)-8-phenyl-4H-1-benzopyran-4-one results in increased expression of CDKN1A protein	increases^expression	17148679
2-(4-morpholinyl)-8-phenyl-4H-1-benzopyran-4-one	C085911	154447-36-6	CDKN1B	1027	Homo sapiens	9606	2-(4-morpholinyl)-8-phenyl-4H-1-benzopyran-4-one results in increased expression of CDKN1B protein	increases^expression	17148679|11322924
2-(4-morpholinyl)-8-phenyl-4H-1-benzopyran-4-one	C085911	154447-36-6	CFLAR	8837	Homo sapiens	9606	2-(4-morpholinyl)-8-phenyl-4H-1-benzopyran-4-one results in decreased expression of CFLAR protein	decreases^expression	12970779
2-(4-morpholinyl)-8-phenyl-4H-1-benzopyran-4-one	C085911	154447-36-6	CFTR	1080	Homo sapiens	9606	2-(4-morpholinyl)-8-phenyl-4H-1-benzopyran-4-one inhibits the reaction [CGP 12177 results in increased activity of CFTR protein]	decreases^reaction|increases^activity	15563584
2-(4-morpholinyl)-8-phenyl-4H-1-benzopyran-4-one	C085911	154447-36-6	CHUK	1147	Homo sapiens	9606	2-(4-morpholinyl)-8-phenyl-4H-1-benzopyran-4-one inhibits the reaction [Lipopolysaccharides results in increased phosphorylation of CHUK protein]	decreases^reaction|increases^phosphorylation	18789402
2-(4-morpholinyl)-8-phenyl-4H-1-benzopyran-4-one	C085911	154447-36-6	CLDN5	7122	Homo sapiens	9606	2-(4-morpholinyl)-8-phenyl-4H-1-benzopyran-4-one inhibits the reaction [Acrolein results in increased expression of CLDN5 mRNA]	decreases^reaction|increases^expression	20525806
2-(4-morpholinyl)-8-phenyl-4H-1-benzopyran-4-one	C085911	154447-36-6	CTNNB1	1499	Homo sapiens	9606	2-(4-morpholinyl)-8-phenyl-4H-1-benzopyran-4-one inhibits the reaction [DEFA1 protein results in decreased phosphorylation of and results in increased activity of CTNNB1 protein]	decreases^phosphorylation|decreases^reaction|increases^activity	19814765
2-(4-morpholinyl)-8-phenyl-4H-1-benzopyran-4-one	C085911	154447-36-6	CTSB	1508	Homo sapiens	9606	2-(4-morpholinyl)-8-phenyl-4H-1-benzopyran-4-one affects the localization of and results in increased activity of CTSB protein	affects^localization|increases^activity	12663669
2-(4-morpholinyl)-8-phenyl-4H-1-benzopyran-4-one	C085911	154447-36-6	CYCS	54205	Homo sapiens	9606	2-(4-morpholinyl)-8-phenyl-4H-1-benzopyran-4-one affects the localization of CYCS protein	affects^localization	15942663
2-(4-morpholinyl)-8-phenyl-4H-1-benzopyran-4-one	C085911	154447-36-6	DDIT3	1649	Homo sapiens	9606	2-(4-morpholinyl)-8-phenyl-4H-1-benzopyran-4-one inhibits the reaction [Curcumin results in increased expression of DDIT3 mRNA]	decreases^reaction|increases^expression	17171638
2-(4-morpholinyl)-8-phenyl-4H-1-benzopyran-4-one	C085911	154447-36-6	DEFA1	1667	Homo sapiens	9606	2-(4-morpholinyl)-8-phenyl-4H-1-benzopyran-4-one inhibits the reaction [DEFA1 protein results in decreased phosphorylation of and results in increased activity of CTNNB1 protein]	decreases^phosphorylation|decreases^reaction|increases^activity	19814765
2-(4-morpholinyl)-8-phenyl-4H-1-benzopyran-4-one	C085911	154447-36-6	DEFA2	100294660	Homo sapiens	9606	2-(4-morpholinyl)-8-phenyl-4H-1-benzopyran-4-one inhibits the reaction [DEFA2 protein results in decreased phosphorylation of and results in increased activity of CTNNB1 protein]	decreases^phosphorylation|decreases^reaction|increases^activity	19814765
2-(4-morpholinyl)-8-phenyl-4H-1-benzopyran-4-one	C085911	154447-36-6	DPP3	10072	Homo sapiens	9606	2-(4-morpholinyl)-8-phenyl-4H-1-benzopyran-4-one inhibits the reaction [DPP3 protein results in increased expression of NQO1 protein]	decreases^reaction|increases^expression	17360324
2-(4-morpholinyl)-8-phenyl-4H-1-benzopyran-4-one	C085911	154447-36-6	EGF	1950	Homo sapiens	9606	2-(4-morpholinyl)-8-phenyl-4H-1-benzopyran-4-one inhibits the reaction [EGF protein results in decreased expression of and results in decreased secretion of KLK3 protein]	decreases^expression|decreases^reaction|decreases^secretion	16472761
2-(4-morpholinyl)-8-phenyl-4H-1-benzopyran-4-one	C085911	154447-36-6	EGFR	1956	Homo sapiens	9606	2-(4-morpholinyl)-8-phenyl-4H-1-benzopyran-4-one inhibits the reaction [NTS protein results in increased phosphorylation of and results in increased activity of EGFR protein]	decreases^reaction|increases^activity|increases^phosphorylation	15177934
2-(4-morpholinyl)-8-phenyl-4H-1-benzopyran-4-one	C085911	154447-36-6	EIF4EBP1	1978	Homo sapiens	9606	2-(4-morpholinyl)-8-phenyl-4H-1-benzopyran-4-one inhibits the reaction [IGF1 protein results in increased phosphorylation of EIF4EBP1 protein]	decreases^reaction|increases^phosphorylation	12569580
2-(4-morpholinyl)-8-phenyl-4H-1-benzopyran-4-one	C085911	154447-36-6	EIF4G2	1982	Homo sapiens	9606	2-(4-morpholinyl)-8-phenyl-4H-1-benzopyran-4-one results in increased expression of EIF4G2 protein	increases^expression	18491231
2-(4-morpholinyl)-8-phenyl-4H-1-benzopyran-4-one	C085911	154447-36-6	ERBB2	2064	Homo sapiens	9606	2-(4-morpholinyl)-8-phenyl-4H-1-benzopyran-4-one inhibits the reaction [ERBB2 results in decreased susceptibility to Cisplatin]	decreases^reaction|decreases^response to substance	21712253
2-(4-morpholinyl)-8-phenyl-4H-1-benzopyran-4-one	C085911	154447-36-6	ESR1	2099	Homo sapiens	9606	2-(4-morpholinyl)-8-phenyl-4H-1-benzopyran-4-one inhibits the reaction [IGF1 protein affects the localization of ESR1 protein]	affects^localization|decreases^reaction	15947004
2-(4-morpholinyl)-8-phenyl-4H-1-benzopyran-4-one	C085911	154447-36-6	F3	2152	Homo sapiens	9606	2-(4-morpholinyl)-8-phenyl-4H-1-benzopyran-4-one inhibits the reaction [Asbestos, Crocidolite results in increased expression of F3 mRNA]	decreases^reaction|increases^expression	15371228
2-(4-morpholinyl)-8-phenyl-4H-1-benzopyran-4-one	C085911	154447-36-6	FAS	355	Homo sapiens	9606	2-(4-morpholinyl)-8-phenyl-4H-1-benzopyran-4-one inhibits the reaction [FGF7 protein results in increased expression of FAS protein]	decreases^reaction|increases^expression	16162944
2-(4-morpholinyl)-8-phenyl-4H-1-benzopyran-4-one	C085911	154447-36-6	FGF2	2247	Homo sapiens	9606	2-(4-morpholinyl)-8-phenyl-4H-1-benzopyran-4-one inhibits the reaction [FGF2 protein results in increased expression of and results in increased activity of HIF1A protein]	decreases^reaction|increases^activity|increases^expression	15631803
2-(4-morpholinyl)-8-phenyl-4H-1-benzopyran-4-one	C085911	154447-36-6	FGF7	2252	Homo sapiens	9606	2-(4-morpholinyl)-8-phenyl-4H-1-benzopyran-4-one inhibits the reaction [FGF7 protein results in increased expression of FAS protein]	decreases^reaction|increases^expression	16162944
2-(4-morpholinyl)-8-phenyl-4H-1-benzopyran-4-one	C085911	154447-36-6	FOXO3	2309	Homo sapiens	9606	2-(4-morpholinyl)-8-phenyl-4H-1-benzopyran-4-one affects the localization of and results in increased activity of FOXO3 protein	affects^localization|increases^activity	19211844
2-(4-morpholinyl)-8-phenyl-4H-1-benzopyran-4-one	C085911	154447-36-6	GBP1	2633	Homo sapiens	9606	2-(4-morpholinyl)-8-phenyl-4H-1-benzopyran-4-one inhibits the reaction [IFNG protein results in increased expression of GBP1 mRNA]	decreases^reaction|increases^expression	15994321
2-(4-morpholinyl)-8-phenyl-4H-1-benzopyran-4-one	C085911	154447-36-6	GCLM	2730	Homo sapiens	9606	2-(4-morpholinyl)-8-phenyl-4H-1-benzopyran-4-one results in decreased activity of GCLM protein	decreases^activity	16972261
2-(4-morpholinyl)-8-phenyl-4H-1-benzopyran-4-one	C085911	154447-36-6	GSK3A	2931	Homo sapiens	9606	2-(4-morpholinyl)-8-phenyl-4H-1-benzopyran-4-one results in decreased phosphorylation of and results in increased activity of GSK3A protein	decreases^phosphorylation|increases^activity	19661225
2-(4-morpholinyl)-8-phenyl-4H-1-benzopyran-4-one	C085911	154447-36-6	GSK3B	2932	Homo sapiens	9606	2-(4-morpholinyl)-8-phenyl-4H-1-benzopyran-4-one inhibits the reaction [DEFA1 protein results in increased phosphorylation of GSK3B protein]	decreases^reaction|increases^phosphorylation	19814765
2-(4-morpholinyl)-8-phenyl-4H-1-benzopyran-4-one	C085911	154447-36-6	GSTA1	2938	Homo sapiens	9606	2-(4-morpholinyl)-8-phenyl-4H-1-benzopyran-4-one inhibits the reaction [sulforafan results in increased expression of GSTA1 mRNA]	decreases^reaction|increases^expression	15090468
2-(4-morpholinyl)-8-phenyl-4H-1-benzopyran-4-one	C085911	154447-36-6	HDC	3067	Homo sapiens	9606	2-(4-morpholinyl)-8-phenyl-4H-1-benzopyran-4-one inhibits the reaction [[BCR protein mutant form binds to ABL1 protein mutant form] which results in increased expression of HDC mRNA]	affects^binding|decreases^reaction|increases^expression	16849647
2-(4-morpholinyl)-8-phenyl-4H-1-benzopyran-4-one	C085911	154447-36-6	HIF1A	3091	Homo sapiens	9606	2-(4-morpholinyl)-8-phenyl-4H-1-benzopyran-4-one inhibits the reaction [4-hydroxyestradiol-17 beta results in increased expression of HIF1A protein]	decreases^reaction|increases^expression	15050414
2-(4-morpholinyl)-8-phenyl-4H-1-benzopyran-4-one	C085911	154447-36-6	HMOX1	3162	Homo sapiens	9606	2-(4-morpholinyl)-8-phenyl-4H-1-benzopyran-4-one inhibits the reaction [Acrolein results in increased expression of HMOX1 mRNA]	decreases^reaction|increases^expression	18048804
2-(4-morpholinyl)-8-phenyl-4H-1-benzopyran-4-one	C085911	154447-36-6	HSF1	3297	Homo sapiens	9606	2-(4-morpholinyl)-8-phenyl-4H-1-benzopyran-4-one inhibits the reaction [Oxygen deficiency results in increased expression of HSF1 mRNA]	decreases^reaction|increases^expression	11424089
2-(4-morpholinyl)-8-phenyl-4H-1-benzopyran-4-one	C085911	154447-36-6	HSP27	39078	Homo sapiens	9606	2-(4-morpholinyl)-8-phenyl-4H-1-benzopyran-4-one inhibits the reaction [arsenic trioxide results in increased expression of HSP27 protein]	decreases^reaction|increases^expression	15665116
2-(4-morpholinyl)-8-phenyl-4H-1-benzopyran-4-one	C085911	154447-36-6	HSP90	692420	Homo sapiens	9606	2-(4-morpholinyl)-8-phenyl-4H-1-benzopyran-4-one results in decreased expression of HSP90 protein	decreases^expression	14726529
2-(4-morpholinyl)-8-phenyl-4H-1-benzopyran-4-one	C085911	154447-36-6	HSPA5	3309	Homo sapiens	9606	2-(4-morpholinyl)-8-phenyl-4H-1-benzopyran-4-one inhibits the reaction [Thapsigargin results in increased expression of HSPA5 mRNA]	decreases^reaction|increases^expression	19428936
2-(4-morpholinyl)-8-phenyl-4H-1-benzopyran-4-one	C085911	154447-36-6	HSPB8	26353	Homo sapiens	9606	2-(4-morpholinyl)-8-phenyl-4H-1-benzopyran-4-one results in decreased expression of HSPB8 protein	decreases^expression	21233418
2-(4-morpholinyl)-8-phenyl-4H-1-benzopyran-4-one	C085911	154447-36-6	ICAM1	3383	Homo sapiens	9606	2-(4-morpholinyl)-8-phenyl-4H-1-benzopyran-4-one inhibits the reaction [IFNG protein results in increased expression of ICAM1 mRNA]	decreases^reaction|increases^expression	15994321
2-(4-morpholinyl)-8-phenyl-4H-1-benzopyran-4-one	C085911	154447-36-6	IFNG	3458	Homo sapiens	9606	2-(4-morpholinyl)-8-phenyl-4H-1-benzopyran-4-one inhibits the reaction [IFNG protein results in decreased phosphorylation of STAT3 protein]	decreases^phosphorylation|decreases^reaction	16427044
2-(4-morpholinyl)-8-phenyl-4H-1-benzopyran-4-one	C085911	154447-36-6	IGF1	3479	Homo sapiens	9606	2-(4-morpholinyl)-8-phenyl-4H-1-benzopyran-4-one inhibits the reaction [IGF1 protein affects the localization of ESR1 protein]	affects^localization|decreases^reaction	15947004
2-(4-morpholinyl)-8-phenyl-4H-1-benzopyran-4-one	C085911	154447-36-6	IGFBP3	3486	Homo sapiens	9606	2-(4-morpholinyl)-8-phenyl-4H-1-benzopyran-4-one inhibits the reaction [IGF1 protein results in increased secretion of IGFBP3 protein]	decreases^reaction|increases^secretion	16682453
2-(4-morpholinyl)-8-phenyl-4H-1-benzopyran-4-one	C085911	154447-36-6	IKBKB	3551	Homo sapiens	9606	2-(4-morpholinyl)-8-phenyl-4H-1-benzopyran-4-one inhibits the reaction [Lipopolysaccharides results in increased phosphorylation of IKBKB protein]	decreases^reaction|increases^phosphorylation	18789402
2-(4-morpholinyl)-8-phenyl-4H-1-benzopyran-4-one	C085911	154447-36-6	IL1B	3553	Homo sapiens	9606	2-(4-morpholinyl)-8-phenyl-4H-1-benzopyran-4-one inhibits the reaction [Digitoxin inhibits the reaction [IL1B protein results in increased activity of NFKB1 protein]]	decreases^reaction|increases^activity	19446813
2-(4-morpholinyl)-8-phenyl-4H-1-benzopyran-4-one	C085911	154447-36-6	IL2	3558	Homo sapiens	9606	2-(4-morpholinyl)-8-phenyl-4H-1-benzopyran-4-one inhibits the reaction [IL2 protein results in increased expression of CCND2 mRNA]	decreases^reaction|increases^expression	15778701
2-(4-morpholinyl)-8-phenyl-4H-1-benzopyran-4-one	C085911	154447-36-6	IL8	3576	Homo sapiens	9606	2-(4-morpholinyl)-8-phenyl-4H-1-benzopyran-4-one inhibits the reaction [2,2',4,6,6'-pentachlorobiphenyl results in increased expression of IL8 mRNA]	decreases^reaction|increases^expression	16611624
2-(4-morpholinyl)-8-phenyl-4H-1-benzopyran-4-one	C085911	154447-36-6	INS	3630	Homo sapiens	9606	2-(4-morpholinyl)-8-phenyl-4H-1-benzopyran-4-one inhibits the reaction [INS protein results in increased phosphorylation of AKT1 protein]	decreases^reaction|increases^phosphorylation	17550345
2-(4-morpholinyl)-8-phenyl-4H-1-benzopyran-4-one	C085911	154447-36-6	ITGA5	3678	Homo sapiens	9606	2-(4-morpholinyl)-8-phenyl-4H-1-benzopyran-4-one inhibits the reaction [IGF1 protein results in increased expression of and affects the localization of [ITGA5 protein binds to ITGB3 protein]]	affects^binding|affects^localization|decreases^reaction|increases^expression	16465378
2-(4-morpholinyl)-8-phenyl-4H-1-benzopyran-4-one	C085911	154447-36-6	ITGAM	3684	Homo sapiens	9606	2-(4-morpholinyl)-8-phenyl-4H-1-benzopyran-4-one inhibits the reaction [CCL11 protein results in increased expression of ITGAM protein]	decreases^reaction|increases^expression	11980903
2-(4-morpholinyl)-8-phenyl-4H-1-benzopyran-4-one	C085911	154447-36-6	ITGB2	3689	Homo sapiens	9606	2-(4-morpholinyl)-8-phenyl-4H-1-benzopyran-4-one inhibits the reaction [ITGB2 protein results in increased activity of RAP1A protein]	decreases^reaction|increases^activity	16963453
2-(4-morpholinyl)-8-phenyl-4H-1-benzopyran-4-one	C085911	154447-36-6	ITGB3	3690	Homo sapiens	9606	2-(4-morpholinyl)-8-phenyl-4H-1-benzopyran-4-one inhibits the reaction [IGF1 protein results in increased expression of and affects the localization of [ITGA5 protein binds to ITGB3 protein]]	affects^binding|affects^localization|decreases^reaction|increases^expression	16465378
2-(4-morpholinyl)-8-phenyl-4H-1-benzopyran-4-one	C085911	154447-36-6	JUN	3725	Homo sapiens	9606	[2-(4-morpholinyl)-8-phenyl-4H-1-benzopyran-4-one co-treated with fludarabine] results in increased phosphorylation of JUN protein	affects^cotreatment|increases^phosphorylation	15850772
2-(4-morpholinyl)-8-phenyl-4H-1-benzopyran-4-one	C085911	154447-36-6	KGF	100008681	Homo sapiens	9606	2-(4-morpholinyl)-8-phenyl-4H-1-benzopyran-4-one inhibits the reaction [[KGF protein results in increased phosphorylation of AKT1 protein] which results in increased expression of ESR1 protein]	decreases^reaction|increases^expression|increases^phosphorylation	19661335
2-(4-morpholinyl)-8-phenyl-4H-1-benzopyran-4-one	C085911	154447-36-6	KIT	3815	Homo sapiens	9606	2-(4-morpholinyl)-8-phenyl-4H-1-benzopyran-4-one inhibits the reaction [KIT protein polymorphism results in increased expression of HMOX1 protein]	decreases^reaction|increases^expression	17420286
2-(4-morpholinyl)-8-phenyl-4H-1-benzopyran-4-one	C085911	154447-36-6	KLK3	354	Homo sapiens	9606	2-(4-morpholinyl)-8-phenyl-4H-1-benzopyran-4-one inhibits the reaction [EGF protein results in decreased expression of and results in decreased secretion of KLK3 protein]	decreases^expression|decreases^reaction|decreases^secretion	16472761
2-(4-morpholinyl)-8-phenyl-4H-1-benzopyran-4-one	C085911	154447-36-6	LGALS3	3958	Homo sapiens	9606	2-(4-morpholinyl)-8-phenyl-4H-1-benzopyran-4-one results in increased expression of and affects the localization of LGALS3 protein	affects^localization|increases^expression	21821001
2-(4-morpholinyl)-8-phenyl-4H-1-benzopyran-4-one	C085911	154447-36-6	LPL	4023	Homo sapiens	9606	2-(4-morpholinyl)-8-phenyl-4H-1-benzopyran-4-one inhibits the reaction [LPL protein promotes the reaction [IFNG protein results in increased expression of GBP1 mRNA]]	decreases^reaction|increases^expression|increases^reaction	15994321
2-(4-morpholinyl)-8-phenyl-4H-1-benzopyran-4-one	C085911	154447-36-6	MAP2K1	5604	Homo sapiens	9606	MAP2K1 protein inhibits the reaction [[2-(4-morpholinyl)-8-phenyl-4H-1-benzopyran-4-one co-treated with fludarabine] results in increased cleavage of CASP3 protein]	affects^cotreatment|decreases^reaction|increases^cleavage	15850772
2-(4-morpholinyl)-8-phenyl-4H-1-benzopyran-4-one	C085911	154447-36-6	MAPK1	5594	Homo sapiens	9606	[2-(4-morpholinyl)-8-phenyl-4H-1-benzopyran-4-one co-treated with fludarabine] results in decreased phosphorylation of MAPK1 protein	affects^cotreatment|decreases^phosphorylation	15850772
2-(4-morpholinyl)-8-phenyl-4H-1-benzopyran-4-one	C085911	154447-36-6	MAPK10	5602	Homo sapiens	9606	2-(4-morpholinyl)-8-phenyl-4H-1-benzopyran-4-one promotes the reaction [Pt(O,O'-acac)(gamma-acac)(DMS) results in increased phosphorylation of MAPK10 protein]	increases^phosphorylation|increases^reaction	21420390
2-(4-morpholinyl)-8-phenyl-4H-1-benzopyran-4-one	C085911	154447-36-6	MAPK3	5595	Homo sapiens	9606	[2-(4-morpholinyl)-8-phenyl-4H-1-benzopyran-4-one co-treated with fludarabine] results in decreased phosphorylation of MAPK3 protein	affects^cotreatment|decreases^phosphorylation	15850772
2-(4-morpholinyl)-8-phenyl-4H-1-benzopyran-4-one	C085911	154447-36-6	MAPK8	5599	Homo sapiens	9606	2-(4-morpholinyl)-8-phenyl-4H-1-benzopyran-4-one promotes the reaction [Pt(O,O'-acac)(gamma-acac)(DMS) results in increased phosphorylation of MAPK8 protein]	increases^phosphorylation|increases^reaction	21420390
2-(4-morpholinyl)-8-phenyl-4H-1-benzopyran-4-one	C085911	154447-36-6	MCL1	4170	Homo sapiens	9606	2-(4-morpholinyl)-8-phenyl-4H-1-benzopyran-4-one results in decreased expression of MCL1 protein	decreases^expression	17148679
2-(4-morpholinyl)-8-phenyl-4H-1-benzopyran-4-one	C085911	154447-36-6	MMP12	4321	Homo sapiens	9606	2-(4-morpholinyl)-8-phenyl-4H-1-benzopyran-4-one inhibits the reaction [IL1B protein results in increased activity of MMP12 protein]	decreases^reaction|increases^activity	16359550
2-(4-morpholinyl)-8-phenyl-4H-1-benzopyran-4-one	C085911	154447-36-6	MT1A	4489	Homo sapiens	9606	2-(4-morpholinyl)-8-phenyl-4H-1-benzopyran-4-one promotes the reaction [Zinc results in increased expression of MT1A mRNA]	increases^expression|increases^reaction	17363595
2-(4-morpholinyl)-8-phenyl-4H-1-benzopyran-4-one	C085911	154447-36-6	MT2A	4502	Homo sapiens	9606	2-(4-morpholinyl)-8-phenyl-4H-1-benzopyran-4-one promotes the reaction [Zinc results in increased expression of MT2A mRNA]	increases^expression|increases^reaction	17363595
2-(4-morpholinyl)-8-phenyl-4H-1-benzopyran-4-one	C085911	154447-36-6	MTOR	2475	Homo sapiens	9606	2-(4-morpholinyl)-8-phenyl-4H-1-benzopyran-4-one results in decreased phosphorylation of MTOR protein	decreases^phosphorylation	17148679
2-(4-morpholinyl)-8-phenyl-4H-1-benzopyran-4-one	C085911	154447-36-6	MYCN	4613	Homo sapiens	9606	2-(4-morpholinyl)-8-phenyl-4H-1-benzopyran-4-one inhibits the reaction [IGF1 protein results in increased expression of MYCN protein]	decreases^reaction|increases^expression	12569580
2-(4-morpholinyl)-8-phenyl-4H-1-benzopyran-4-one	C085911	154447-36-6	NFKB1	4790	Homo sapiens	9606	2-(4-morpholinyl)-8-phenyl-4H-1-benzopyran-4-one inhibits the reaction [Digitoxin inhibits the reaction [IL1B protein results in increased activity of NFKB1 protein]]	decreases^reaction|increases^activity	19446813
2-(4-morpholinyl)-8-phenyl-4H-1-benzopyran-4-one	C085911	154447-36-6	NOS3	4846	Homo sapiens	9606	2-(4-morpholinyl)-8-phenyl-4H-1-benzopyran-4-one inhibits the reaction [4-(3-(2-propyl-3-hydroxy-4-acetyl)phenoxy)propyloxyphenoxy acetic acid results in increased phosphorylation of NOS3 protein]	decreases^reaction|increases^phosphorylation	19906781
2-(4-morpholinyl)-8-phenyl-4H-1-benzopyran-4-one	C085911	154447-36-6	NQO1	1728	Homo sapiens	9606	2-(4-morpholinyl)-8-phenyl-4H-1-benzopyran-4-one inhibits the reaction [DPP3 protein results in increased expression of NQO1 protein]	decreases^reaction|increases^expression	17360324
2-(4-morpholinyl)-8-phenyl-4H-1-benzopyran-4-one	C085911	154447-36-6	NTS	4922	Homo sapiens	9606	2-(4-morpholinyl)-8-phenyl-4H-1-benzopyran-4-one inhibits the reaction [NTS protein results in increased phosphorylation of and results in increased activity of AKT1 protein]	decreases^reaction|increases^activity|increases^phosphorylation	15177934
2-(4-morpholinyl)-8-phenyl-4H-1-benzopyran-4-one	C085911	154447-36-6	PARP1	142	Homo sapiens	9606	[TNFSF10 protein co-treated with 2-(4-morpholinyl)-8-phenyl-4H-1-benzopyran-4-one] results in increased cleavage of PARP1 protein	affects^cotreatment|increases^cleavage	19261616
2-(4-morpholinyl)-8-phenyl-4H-1-benzopyran-4-one	C085911	154447-36-6	PDCD4	27250	Homo sapiens	9606	2-(4-morpholinyl)-8-phenyl-4H-1-benzopyran-4-one promotes the reaction [Tretinoin results in increased expression of PDCD4 protein]	increases^expression|increases^reaction	17259349
2-(4-morpholinyl)-8-phenyl-4H-1-benzopyran-4-one	C085911	154447-36-6	PDGFB	5155	Homo sapiens	9606	2-(4-morpholinyl)-8-phenyl-4H-1-benzopyran-4-one inhibits the reaction [PDGFB protein results in increased phosphorylation of and results in increased activity of AKT1 protein]	decreases^reaction|increases^activity|increases^phosphorylation	15919668
2-(4-morpholinyl)-8-phenyl-4H-1-benzopyran-4-one	C085911	154447-36-6	PIK3CG	5294	Homo sapiens	9606	2-(4-morpholinyl)-8-phenyl-4H-1-benzopyran-4-one results in decreased activity of PIK3CG protein	decreases^activity	16794257
2-(4-morpholinyl)-8-phenyl-4H-1-benzopyran-4-one	C085911	154447-36-6	PIN1	5300	Homo sapiens	9606	2-(4-morpholinyl)-8-phenyl-4H-1-benzopyran-4-one results in decreased expression of PIN1 protein	decreases^expression	20804812
2-(4-morpholinyl)-8-phenyl-4H-1-benzopyran-4-one	C085911	154447-36-6	PRKCD	5580	Homo sapiens	9606	2-(4-morpholinyl)-8-phenyl-4H-1-benzopyran-4-one affects the localization of PRKCD protein	affects^localization	20082316
2-(4-morpholinyl)-8-phenyl-4H-1-benzopyran-4-one	C085911	154447-36-6	PRKCZ	5590	Homo sapiens	9606	2-(4-morpholinyl)-8-phenyl-4H-1-benzopyran-4-one affects the localization of PRKCZ protein	affects^localization	15735031
2-(4-morpholinyl)-8-phenyl-4H-1-benzopyran-4-one	C085911	154447-36-6	PTEN	5728	Homo sapiens	9606	[decitabine co-treated with 2-(4-morpholinyl)-8-phenyl-4H-1-benzopyran-4-one co-treated with Sirolimus] results in increased expression of PTEN mRNA	affects^cotreatment|increases^expression	18622747
2-(4-morpholinyl)-8-phenyl-4H-1-benzopyran-4-one	C085911	154447-36-6	PTK2	5747	Homo sapiens	9606	2-(4-morpholinyl)-8-phenyl-4H-1-benzopyran-4-one inhibits the reaction [PTK2 protein promotes the reaction [Doxorubicin results in increased phosphorylation of AKT1 protein]]	decreases^reaction|increases^phosphorylation|increases^reaction	16168102
2-(4-morpholinyl)-8-phenyl-4H-1-benzopyran-4-one	C085911	154447-36-6	RAD23B	5887	Homo sapiens	9606	2-(4-morpholinyl)-8-phenyl-4H-1-benzopyran-4-one inhibits the reaction [Cisplatin results in increased expression of RAD23B protein]	decreases^reaction|increases^expression	21742020
2-(4-morpholinyl)-8-phenyl-4H-1-benzopyran-4-one	C085911	154447-36-6	RAF1	5894	Homo sapiens	9606	2-(4-morpholinyl)-8-phenyl-4H-1-benzopyran-4-one inhibits the reaction [Phosphates results in increased phosphorylation of RAF1 protein]	decreases^reaction|increases^phosphorylation	16763222
2-(4-morpholinyl)-8-phenyl-4H-1-benzopyran-4-one	C085911	154447-36-6	RAP1A	5906	Homo sapiens	9606	2-(4-morpholinyl)-8-phenyl-4H-1-benzopyran-4-one inhibits the reaction [ITGB2 protein results in increased activity of RAP1A protein]	decreases^reaction|increases^activity	16963453
2-(4-morpholinyl)-8-phenyl-4H-1-benzopyran-4-one	C085911	154447-36-6	RB1	5925	Homo sapiens	9606	[Sirolimus co-treated with 2-(4-morpholinyl)-8-phenyl-4H-1-benzopyran-4-one] inhibits the reaction [IL2 protein results in increased phosphorylation of RB1 protein]	affects^cotreatment|decreases^reaction|increases^phosphorylation	15778701
2-(4-morpholinyl)-8-phenyl-4H-1-benzopyran-4-one	C085911	154447-36-6	RELA	5970	Homo sapiens	9606	2-(4-morpholinyl)-8-phenyl-4H-1-benzopyran-4-one inhibits the reaction [Ethanol affects the localization of and results in increased activity of RELA protein]	affects^localization|decreases^reaction|increases^activity	18295389
2-(4-morpholinyl)-8-phenyl-4H-1-benzopyran-4-one	C085911	154447-36-6	RPS6	6194	Homo sapiens	9606	2-(4-morpholinyl)-8-phenyl-4H-1-benzopyran-4-one inhibits the reaction [IL2 protein results in increased phosphorylation of RPS6 protein]	decreases^reaction|increases^phosphorylation	15778701
2-(4-morpholinyl)-8-phenyl-4H-1-benzopyran-4-one	C085911	154447-36-6	RPS6KB1	6198	Homo sapiens	9606	2-(4-morpholinyl)-8-phenyl-4H-1-benzopyran-4-one inhibits the reaction [PDGFB protein results in increased phosphorylation of and results in increased activity of RPS6KB1 protein]	decreases^reaction|increases^activity|increases^phosphorylation	15919668
2-(4-morpholinyl)-8-phenyl-4H-1-benzopyran-4-one	C085911	154447-36-6	SCD	6319	Homo sapiens	9606	2-(4-morpholinyl)-8-phenyl-4H-1-benzopyran-4-one inhibits the reaction [FGF7 protein results in increased expression of SCD protein]	decreases^reaction|increases^expression	16162944
2-(4-morpholinyl)-8-phenyl-4H-1-benzopyran-4-one	C085911	154447-36-6	SIRPA	140885	Homo sapiens	9606	2-(4-morpholinyl)-8-phenyl-4H-1-benzopyran-4-one inhibits the reaction [SIRPA protein inhibits the reaction [Lipopolysaccharides results in increased secretion of TNF protein]]	decreases^reaction|increases^secretion	12805067
2-(4-morpholinyl)-8-phenyl-4H-1-benzopyran-4-one	C085911	154447-36-6	SLC5A5	6528	Homo sapiens	9606	2-(4-morpholinyl)-8-phenyl-4H-1-benzopyran-4-one inhibits the reaction [Carbamazepine promotes the reaction [Tretinoin results in increased expression of SLC5A5 protein]]	decreases^reaction|increases^expression|increases^reaction	20300827
2-(4-morpholinyl)-8-phenyl-4H-1-benzopyran-4-one	C085911	154447-36-6	SQSTM1	8878	Homo sapiens	9606	2-(4-morpholinyl)-8-phenyl-4H-1-benzopyran-4-one inhibits the reaction [SQSTM1 protein results in increased expression of NQO1 protein]	decreases^reaction|increases^expression	17360324
2-(4-morpholinyl)-8-phenyl-4H-1-benzopyran-4-one	C085911	154447-36-6	SREBF1	6720	Homo sapiens	9606	2-(4-morpholinyl)-8-phenyl-4H-1-benzopyran-4-one inhibits the reaction [FGF7 protein results in increased expression of SREBF1 protein]	decreases^reaction|increases^expression	16162944
2-(4-morpholinyl)-8-phenyl-4H-1-benzopyran-4-one	C085911	154447-36-6	STAT3	6774	Homo sapiens	9606	2-(4-morpholinyl)-8-phenyl-4H-1-benzopyran-4-one inhibits the reaction [IFNG protein results in decreased phosphorylation of STAT3 protein]	decreases^phosphorylation|decreases^reaction	16427044
2-(4-morpholinyl)-8-phenyl-4H-1-benzopyran-4-one	C085911	154447-36-6	STS	412	Homo sapiens	9606	2-(4-morpholinyl)-8-phenyl-4H-1-benzopyran-4-one inhibits the reaction [Tretinoin results in increased activity of STS protein]	decreases^reaction|increases^activity	16178010
2-(4-morpholinyl)-8-phenyl-4H-1-benzopyran-4-one	C085911	154447-36-6	TERT	7015	Homo sapiens	9606	2-(4-morpholinyl)-8-phenyl-4H-1-benzopyran-4-one inhibits the reaction [Estradiol results in increased activity of TERT protein]	decreases^reaction|increases^activity	16798746
2-(4-morpholinyl)-8-phenyl-4H-1-benzopyran-4-one	C085911	154447-36-6	TF	7018	Homo sapiens	9606	2-(4-morpholinyl)-8-phenyl-4H-1-benzopyran-4-one results in decreased activity of TF protein	decreases^activity	19238537
2-(4-morpholinyl)-8-phenyl-4H-1-benzopyran-4-one	C085911	154447-36-6	TGM2	7052	Homo sapiens	9606	2-(4-morpholinyl)-8-phenyl-4H-1-benzopyran-4-one inhibits the reaction [Ethanol results in increased activity of TGM2 protein]	decreases^reaction|increases^activity	18295389
2-(4-morpholinyl)-8-phenyl-4H-1-benzopyran-4-one	C085911	154447-36-6	TNF	7124	Homo sapiens	9606	2-(4-morpholinyl)-8-phenyl-4H-1-benzopyran-4-one inhibits the reaction [SIRPA protein inhibits the reaction [Lipopolysaccharides results in increased secretion of TNF protein]]	decreases^reaction|increases^secretion	12805067
2-(4-morpholinyl)-8-phenyl-4H-1-benzopyran-4-one	C085911	154447-36-6	TNFRSF10A	8797	Homo sapiens	9606	2-(4-morpholinyl)-8-phenyl-4H-1-benzopyran-4-one results in increased expression of TNFRSF10A	increases^expression	15942663
2-(4-morpholinyl)-8-phenyl-4H-1-benzopyran-4-one	C085911	154447-36-6	TNFRSF10B	8795	Homo sapiens	9606	2-(4-morpholinyl)-8-phenyl-4H-1-benzopyran-4-one results in increased expression of TNFRSF10B	increases^expression	15942663
2-(4-morpholinyl)-8-phenyl-4H-1-benzopyran-4-one	C085911	154447-36-6	TNFSF10	8743	Homo sapiens	9606	[TNFSF10 protein co-treated with 2-(4-morpholinyl)-8-phenyl-4H-1-benzopyran-4-one] results in increased cleavage of CASP3 protein	affects^cotreatment|increases^cleavage	19261616
2-(4-morpholinyl)-8-phenyl-4H-1-benzopyran-4-one	C085911	154447-36-6	TP53	7157	Homo sapiens	9606	2-(4-morpholinyl)-8-phenyl-4H-1-benzopyran-4-one inhibits the reaction [ANGPT1 protein inhibits the reaction [Doxorubicin results in increased expression of TP53 protein]]	decreases^reaction|increases^expression	15763944
2-(4-morpholinyl)-8-phenyl-4H-1-benzopyran-4-one	C085911	154447-36-6	UGT1A1	54658	Homo sapiens	9606	2-(4-morpholinyl)-8-phenyl-4H-1-benzopyran-4-one inhibits the reaction [erucin results in increased expression of UGT1A1 mRNA]	decreases^reaction|increases^expression	15896333
2-(4-morpholinyl)-8-phenyl-4H-1-benzopyran-4-one	C085911	154447-36-6	VEGFA	7422	Homo sapiens	9606	2-(4-morpholinyl)-8-phenyl-4H-1-benzopyran-4-one inhibits the reaction [4-hydroxyestradiol-17 beta results in increased expression of VEGFA protein]	decreases^reaction|increases^expression	15050414
2-(4-morpholinyl)-8-phenyl-4H-1-benzopyran-4-one	C085911	154447-36-6	XIAP	331	Homo sapiens	9606	2-(4-morpholinyl)-8-phenyl-4H-1-benzopyran-4-one inhibits the reaction [Thapsigargin results in increased expression of XIAP mRNA]	decreases^reaction|increases^expression	15339911
2,4-nonadienal	C412886	6750-03-04	AKR1B1	231	Homo sapiens	9606	AKR1B1 protein results in increased reduction of 2,4-nonadienal	increases^reduction	9890881
2-(4-(quinolin-2-yl-methoxy)phenyl)-2-cyclopentylacetic acid	C079315	128253-31-6	ALOX5AP	241	Homo sapiens	9606	2-(4-(quinolin-2-yl-methoxy)phenyl)-2-cyclopentylacetic acid results in decreased activity of ALOX5AP protein	decreases^activity	9113110
2,4-thiazolidinedione	C089946	2295-31-0	BAX	581	Homo sapiens	9606	2,4-thiazolidinedione results in increased expression of BAX protein	increases^expression	15916743
2,4-thiazolidinedione	C089946	2295-31-0	BCL2	596	Homo sapiens	9606	2,4-thiazolidinedione results in decreased expression of BCL2 protein	decreases^expression	15916743
2,4-thiazolidinedione	C089946	2295-31-0	CCND1	595	Homo sapiens	9606	2,4-thiazolidinedione results in decreased expression of CCND1 protein	decreases^expression	15916743
2,4-thiazolidinedione	C089946	2295-31-0	CDK4	1019	Homo sapiens	9606	2,4-thiazolidinedione results in decreased expression of CDK4 protein	decreases^expression	15916743
2,4-thiazolidinedione	C089946	2295-31-0	CDKN1A	1026	Homo sapiens	9606	2,4-thiazolidinedione results in increased expression of CDKN1A protein	increases^expression	15916743
2,4-thiazolidinedione	C089946	2295-31-0	CDKN1B	1027	Homo sapiens	9606	2,4-thiazolidinedione results in increased expression of CDKN1B protein	increases^expression	15916743
2,4-thiazolidinedione	C089946	2295-31-0	CYP1A1	1543	Homo sapiens	9606	2,4-thiazolidinedione results in decreased expression of CYP1A1	decreases^expression	15521013
2,4-thiazolidinedione	C089946	2295-31-0	PCNA	5111	Homo sapiens	9606	2,4-thiazolidinedione results in decreased expression of PCNA protein	decreases^expression	15916743
2,4-thiazolidinedione	C089946	2295-31-0	PPARG	5468	Homo sapiens	9606	2,4-thiazolidinedione binds to and results in increased activity of PPARG protein	affects^binding|increases^activity	15521013
2,4-thiazolidinedione	C089946	2295-31-0	RB1	5925	Homo sapiens	9606	2,4-thiazolidinedione results in decreased expression of RB1 protein	decreases^expression	15916743
2-(4-toluidino)-6-naphthalenesulfonic acid	C009497	7724-15-4	GSTP1	2950	Homo sapiens	9606	2-(4-toluidino)-6-naphthalenesulfonic acid binds to GSTP1 protein	affects^binding	7725348
2,5,2',5'-tetrachlorobiphenyl	C009407	35693-99-3	GABRA1	2554	Homo sapiens	9606	[2,5,2',5'-tetrachlorobiphenyl co-treated with gamma-Aminobutyric Acid] binds to and results in increased activity of [GABRA1 protein binds to GABRB2 protein binds to GABRG2 protein]	affects^binding|affects^cotreatment|increases^activity	20819908
2,5,2',5'-tetrachlorobiphenyl	C009407	35693-99-3	GABRB2	2561	Homo sapiens	9606	[2,5,2',5'-tetrachlorobiphenyl co-treated with gamma-Aminobutyric Acid] binds to and results in increased activity of [GABRA1 protein binds to GABRB2 protein binds to GABRG2 protein]	affects^binding|affects^cotreatment|increases^activity	20819908
2,5,2',5'-tetrachlorobiphenyl	C009407	35693-99-3	GABRG2	2566	Homo sapiens	9606	[2,5,2',5'-tetrachlorobiphenyl co-treated with gamma-Aminobutyric Acid] binds to and results in increased activity of [GABRA1 protein binds to GABRB2 protein binds to GABRG2 protein]	affects^binding|affects^cotreatment|increases^activity	20819908
2,5,2',5'-tetrachlorobiphenyl	C009407	35693-99-3	PLA2G4A	5321	Homo sapiens	9606	2,5,2',5'-tetrachlorobiphenyl affects the localization of and results in increased phosphorylation of PLA2G4A protein	affects^localization|increases^phosphorylation	16290172
2,5,7,8-tetramethyl-2R-(4R,8R,12-trimethyltridecyl)chroman-6-yloxy acetic acid	C488288		ABL1	25	Homo sapiens	9606	[Cisplatin co-treated with 2,5,7,8-tetramethyl-2R-(4R,8R,12-trimethyltridecyl)chroman-6-yloxy acetic acid] results in increased phosphorylation of ABL1 protein	affects^cotreatment|increases^phosphorylation	21214929
2,5,7,8-tetramethyl-2R-(4R,8R,12-trimethyltridecyl)chroman-6-yloxy acetic acid	C488288		BAX	581	Homo sapiens	9606	[[Cisplatin co-treated with 2,5,7,8-tetramethyl-2R-(4R,8R,12-trimethyltridecyl)chroman-6-yloxy acetic acid] results in increased expression of TP73 protein] which results in increased expression of BAX mRNA	affects^cotreatment|increases^expression	21214929
2,5,7,8-tetramethyl-2R-(4R,8R,12-trimethyltridecyl)chroman-6-yloxy acetic acid	C488288		BCL2	596	Homo sapiens	9606	[[Cisplatin co-treated with 2,5,7,8-tetramethyl-2R-(4R,8R,12-trimethyltridecyl)chroman-6-yloxy acetic acid] results in increased expression of TP73 protein] which results in decreased expression of BCL2 mRNA	affects^cotreatment|decreases^expression|increases^expression	21214929
2,5,7,8-tetramethyl-2R-(4R,8R,12-trimethyltridecyl)chroman-6-yloxy acetic acid	C488288		CASP8	841	Homo sapiens	9606	[Cisplatin co-treated with 2,5,7,8-tetramethyl-2R-(4R,8R,12-trimethyltridecyl)chroman-6-yloxy acetic acid] results in increased cleavage of CASP8 protein	affects^cotreatment|increases^cleavage	21214929
2,5,7,8-tetramethyl-2R-(4R,8R,12-trimethyltridecyl)chroman-6-yloxy acetic acid	C488288		CASP9	842	Homo sapiens	9606	[Cisplatin co-treated with 2,5,7,8-tetramethyl-2R-(4R,8R,12-trimethyltridecyl)chroman-6-yloxy acetic acid] results in increased cleavage of CASP9 protein	affects^cotreatment|increases^cleavage	21214929
2,5,7,8-tetramethyl-2R-(4R,8R,12-trimethyltridecyl)chroman-6-yloxy acetic acid	C488288		FAS	355	Homo sapiens	9606	[[Cisplatin co-treated with 2,5,7,8-tetramethyl-2R-(4R,8R,12-trimethyltridecyl)chroman-6-yloxy acetic acid] results in increased expression of TP73 protein] which results in increased expression of FAS mRNA	affects^cotreatment|increases^expression	21214929
2,5,7,8-tetramethyl-2R-(4R,8R,12-trimethyltridecyl)chroman-6-yloxy acetic acid	C488288		MAPK8	5599	Homo sapiens	9606	[Cisplatin co-treated with 2,5,7,8-tetramethyl-2R-(4R,8R,12-trimethyltridecyl)chroman-6-yloxy acetic acid] results in increased phosphorylation of MAPK8 protein	affects^cotreatment|increases^phosphorylation	21214929
2,5,7,8-tetramethyl-2R-(4R,8R,12-trimethyltridecyl)chroman-6-yloxy acetic acid	C488288		MAPK9	5601	Homo sapiens	9606	[Cisplatin co-treated with 2,5,7,8-tetramethyl-2R-(4R,8R,12-trimethyltridecyl)chroman-6-yloxy acetic acid] results in increased phosphorylation of MAPK9 protein	affects^cotreatment|increases^phosphorylation	21214929
2,5,7,8-tetramethyl-2R-(4R,8R,12-trimethyltridecyl)chroman-6-yloxy acetic acid	C488288		PMAIP1	5366	Homo sapiens	9606	[[Cisplatin co-treated with 2,5,7,8-tetramethyl-2R-(4R,8R,12-trimethyltridecyl)chroman-6-yloxy acetic acid] results in increased expression of TP73 protein] which results in increased expression of PMAIP1 mRNA	affects^cotreatment|increases^expression	21214929
2,5,7,8-tetramethyl-2R-(4R,8R,12-trimethyltridecyl)chroman-6-yloxy acetic acid	C488288		TNFRSF10B	8795	Homo sapiens	9606	[[Cisplatin co-treated with 2,5,7,8-tetramethyl-2R-(4R,8R,12-trimethyltridecyl)chroman-6-yloxy acetic acid] results in increased expression of TP73 protein] which results in increased expression of TNFRSF10B mRNA	affects^cotreatment|increases^expression	21214929
2,5,7,8-tetramethyl-2R-(4R,8R,12-trimethyltridecyl)chroman-6-yloxy acetic acid	C488288		TP73	7161	Homo sapiens	9606	[Cisplatin co-treated with 2,5,7,8-tetramethyl-2R-(4R,8R,12-trimethyltridecyl)chroman-6-yloxy acetic acid] results in increased expression of TP73 protein	affects^cotreatment|increases^expression	21214929
2,5,7,8-tetramethyl-2R-(4R,8R,12-trimethyltridecyl)chroman-6-yloxy acetic acid	C488288		YAP1	10413	Homo sapiens	9606	[Cisplatin co-treated with 2,5,7,8-tetramethyl-2R-(4R,8R,12-trimethyltridecyl)chroman-6-yloxy acetic acid] results in decreased phosphorylation of and affects the localization of YAP1 protein	affects^cotreatment|affects^localization|decreases^phosphorylation	21214929
2,5-diaziridinyl-3-(hydroxymethyl)-6-methyl-1,4-benzoquinone	C117776		NQO1	1728	Homo sapiens	9606	NQO1 protein results in increased metabolism of and results in increased susceptibility to 2,5-diaziridinyl-3-(hydroxymethyl)-6-methyl-1,4-benzoquinone	increases^metabolic processing|increases^response to substance	9865924
2,5-diaziridinyl-3-(hydroxymethyl)-6-methyl-1,4-benzoquinone	C117776		POR	5447	Homo sapiens	9606	POR protein results in increased reduction of 2,5-diaziridinyl-3-(hydroxymethyl)-6-methyl-1,4-benzoquinone	increases^reduction	17256129
2,5-dichlorobiphenyl	C029905	34883-39-1	SULT2A1	6822	Homo sapiens	9606	2,5-dichlorobiphenyl metabolite inhibits the reaction [SULT2A1 protein affects the metabolism of Dehydroepiandrosterone]	affects^metabolic processing|decreases^reaction	17112228
2,5-dihydroxybenzaldehyde	C112784	1194-98-5	ALDH2	217	Homo sapiens	9606	ALDH2 protein results in increased metabolism of 2,5-dihydroxybenzaldehyde	increases^metabolic processing	11744614
2,5-dihydroxybenzoic acid	C010925	490-79-9	G6PD	2539	Homo sapiens	9606	2,5-dihydroxybenzoic acid results in decreased activity of G6PD protein mutant form	decreases^activity	5432368
2,5-dihydroxybenzoic acid	C010925	490-79-9	SULT1A1	6817	Homo sapiens	9606	2,5-dihydroxybenzoic acid results in increased activity of SULT1A1 protein	increases^activity	16308312
2',5'-dihydroxychalcone	C107497		UGT1A1	54658	Homo sapiens	9606	UGT1A1 protein results in increased glucuronidation of 2',5'-dihydroxychalcone	increases^glucuronidation	14557274
2',5'-dihydroxychalcone	C107497		UGT1A10	54575	Homo sapiens	9606	UGT1A10 protein results in increased glucuronidation of 2',5'-dihydroxychalcone	increases^glucuronidation	14557274
2',5'-dihydroxychalcone	C107497		UGT1A7	54577	Homo sapiens	9606	UGT1A7 protein results in increased glucuronidation of 2',5'-dihydroxychalcone	increases^glucuronidation	14557274
2',5'-dihydroxychalcone	C107497		UGT1A8	54576	Homo sapiens	9606	UGT1A8 protein results in increased glucuronidation of 2',5'-dihydroxychalcone	increases^glucuronidation	14557274
2',5'-dihydroxychalcone	C107497		UGT1A9	54600	Homo sapiens	9606	UGT1A9 protein results in increased glucuronidation of 2',5'-dihydroxychalcone	increases^glucuronidation	14557274
2,5-dimethyl-3,6-diaziridinyl-1,4-benzoquinone	C073715	18735-47-2	NQO1	1728	Homo sapiens	9606	NQO1 protein results in increased metabolism of and results in increased susceptibility to 2,5-dimethyl-3,6-diaziridinyl-1,4-benzoquinone	increases^metabolic processing|increases^response to substance	9865924
2,5-dimethylcelecoxib	C506698		BIRC5	332	Homo sapiens	9606	2,5-dimethylcelecoxib results in decreased expression of BIRC5 protein	decreases^expression	16707021|16123214
2,5-dimethylcelecoxib	C506698		CASP3	836	Homo sapiens	9606	2,5-dimethylcelecoxib results in increased cleavage of and results in increased activity of CASP3 protein	increases^activity|increases^cleavage	16123214
2,5-dimethylcelecoxib	C506698		CASP7	840	Homo sapiens	9606	2,5-dimethylcelecoxib results in increased activity of CASP7 protein	increases^activity	18485224
2,5-dimethylcelecoxib	C506698		DDIT3	1649	Homo sapiens	9606	2,5-dimethylcelecoxib results in increased expression of DDIT3 protein	increases^expression	18485224
2,5-dimethylcelecoxib	C506698		IL6	3569	Homo sapiens	9606	2,5-dimethylcelecoxib inhibits the reaction [IL6 protein results in increased phosphorylation of MAP2K1 protein]	decreases^reaction|increases^phosphorylation	16123214
2,5-dimethylcelecoxib	C506698		MAP2K1	5604	Homo sapiens	9606	2,5-dimethylcelecoxib inhibits the reaction [IL6 protein results in increased phosphorylation of MAP2K1 protein]	decreases^reaction|increases^phosphorylation	16123214
2,5-dimethylcelecoxib	C506698		MAP2K2	5605	Homo sapiens	9606	2,5-dimethylcelecoxib inhibits the reaction [IL6 protein results in increased phosphorylation of MAP2K2 protein]	decreases^reaction|increases^phosphorylation	16123214
2,5-dimethylcelecoxib	C506698		PARP1	142	Homo sapiens	9606	2,5-dimethylcelecoxib results in increased cleavage of PARP1 protein	increases^cleavage	16123214|18485224
2,5-dimethylcelecoxib	C506698		STAT3	6774	Homo sapiens	9606	2,5-dimethylcelecoxib inhibits the reaction [IL6 protein results in increased phosphorylation of STAT3 protein]	decreases^reaction|increases^phosphorylation	16123214
25-hydroxycholesterol	C007997	2140-46-7	ABCA1	19	Homo sapiens	9606	[25-hydroxycholesterol co-treated with alitretinoin] results in increased expression of ABCA1 protein	affects^cotreatment|increases^expression	16023994
25-hydroxycholesterol	C007997	2140-46-7	ADIPOR1	51094	Homo sapiens	9606	[25-hydroxycholesterol co-treated with alitretinoin] results in decreased expression of ADIPOR1 mRNA	affects^cotreatment|decreases^expression	16023994
25-hydroxycholesterol	C007997	2140-46-7	CYP27A1	1593	Homo sapiens	9606	[CYP27A1 protein results in increased metabolism of Cholesterol] which results in increased chemical synthesis of 25-hydroxycholesterol	increases^chemical synthesis|increases^metabolic processing	8078928
25-hydroxycholesterol	C007997	2140-46-7	CYP7A1	1581	Homo sapiens	9606	CYP7A1 protein results in increased metabolism of 25-hydroxycholesterol	increases^metabolic processing	10882719
25-hydroxycholesterol	C007997	2140-46-7	ESR1	2099	Homo sapiens	9606	25-hydroxycholesterol binds to and results in decreased activity of ESR1 protein	affects^binding|decreases^activity	17873880
25-hydroxycholesterol	C007997	2140-46-7	ESR2	2100	Homo sapiens	9606	25-hydroxycholesterol binds to and results in decreased activity of ESR2 protein	affects^binding|decreases^activity	17873880
25-hydroxycholesterol	C007997	2140-46-7	HMGCR	3156	Homo sapiens	9606	25-hydroxycholesterol metabolite results in decreased activity of HMGCR protein	decreases^activity	9059514
25-hydroxycholesterol	C007997	2140-46-7	IL1B	3553	Homo sapiens	9606	25-hydroxycholesterol promotes the reaction [Lipopolysaccharides results in increased secretion of IL1B protein]	increases^reaction|increases^secretion	11851725
25-hydroxycholesterol	C007997	2140-46-7	IL6	3569	Homo sapiens	9606	25-hydroxycholesterol inhibits the reaction [Lipopolysaccharides results in increased secretion of IL6 protein]	decreases^reaction|increases^secretion	11851725
25-hydroxycholesterol	C007997	2140-46-7	IL8	3576	Homo sapiens	9606	25-hydroxycholesterol results in increased expression of IL8 mRNA	increases^expression	19426978|16142584
25-hydroxycholesterol	C007997	2140-46-7	LPL	4023	Homo sapiens	9606	25-hydroxycholesterol results in decreased activity of LPL protein	decreases^activity	8567968
25-hydroxycholesterol	C007997	2140-46-7	NOS2	4843	Homo sapiens	9606	25-hydroxycholesterol results in increased expression of NOS2 mRNA	increases^expression	12085989
25-hydroxycholesterol	C007997	2140-46-7	NOS3	4846	Homo sapiens	9606	25-hydroxycholesterol results in decreased expression of NOS3 mRNA	decreases^expression	19426978
25-hydroxycholesterol	C007997	2140-46-7	NR5A1	2516	Homo sapiens	9606	25-hydroxycholesterol promotes the reaction [NR5A1 protein results in increased expression of STAR protein]	increases^expression|increases^reaction	9804848
25-hydroxycholesterol	C007997	2140-46-7	SREBF2	6721	Homo sapiens	9606	25-hydroxycholesterol results in decreased activity of SREBF2 protein	decreases^activity	17052361
25-hydroxycholesterol	C007997	2140-46-7	STAR	6770	Homo sapiens	9606	25-hydroxycholesterol promotes the reaction [NR5A1 protein results in increased expression of STAR protein]	increases^expression|increases^reaction	9804848
25-hydroxycholesterol	C007997	2140-46-7	TNFSF15	9966	Homo sapiens	9606	25-hydroxycholesterol results in increased expression of TNFSF15 mRNA	increases^expression	19426978
25-hydroxycholesterol	C007997	2140-46-7	VCAM1	7412	Homo sapiens	9606	25-hydroxycholesterol results in increased expression of VCAM1 mRNA	increases^expression	19426978
25-hydroxyvitamin D	C104450	64719-49-9	CYP27B1	1594	Homo sapiens	9606	CYP27B1 protein promotes the reaction [25-hydroxyvitamin D results in increased expression of TRPV6 mRNA]	increases^expression|increases^reaction	16362534
25-hydroxyvitamin D	C104450	64719-49-9	TRPV6	55503	Homo sapiens	9606	25-hydroxyvitamin D results in increased expression of TRPV6 mRNA	increases^expression	16362534
2',5'-oligoadenylate	C023505	61172-40-5	OAS1	4938	Homo sapiens	9606	[OAS1 protein results in increased metabolism of Adenosine Triphosphate] which results in increased chemical synthesis of 2',5'-oligoadenylate	increases^chemical synthesis|increases^metabolic processing	15732009
26,26,26,27,27,27-hexafluoro-1,25-dihydroxyvitamin D3	C040488	83805-11-2	MED1	5469	Homo sapiens	9606	26,26,26,27,27,27-hexafluoro-1,25-dihydroxyvitamin D3 analog promotes the reaction [VDR protein mutant form binds to MED1 protein]	affects^binding|increases^reaction	16059639
26,26,26,27,27,27-hexafluoro-1,25-dihydroxyvitamin D3	C040488	83805-11-2	NCOA2	10499	Homo sapiens	9606	26,26,26,27,27,27-hexafluoro-1,25-dihydroxyvitamin D3 analog promotes the reaction [VDR protein mutant form binds to NCOA2 protein]	affects^binding|increases^reaction	16059639
26,26,26,27,27,27-hexafluoro-1,25-dihydroxyvitamin D3	C040488	83805-11-2	VDR	7421	Homo sapiens	9606	26,26,26,27,27,27-hexafluoro-1,25-dihydroxyvitamin D3 analog promotes the reaction [VDR protein mutant form binds to MED1 protein]	affects^binding|increases^reaction	16059639
26-aminocholesterol	C058194	71472-94-1	HMGCR	3156	Homo sapiens	9606	26-aminocholesterol results in decreased activity of HMGCR protein	decreases^activity	7749852
2,6-diamino-4-hydroxy-5-formamidopyrimidine	C071023	133310-38-0	NEIL1	79661	Homo sapiens	9606	NEIL1 protein affects the metabolism of 2,6-diamino-4-hydroxy-5-formamidopyrimidine	affects^metabolic processing	17389588
2,6-dichloro-4-nitrophenol	C015802	618-80-4	ACO2	50	Homo sapiens	9606	2,6-dichloro-4-nitrophenol results in decreased expression of ACO2 mRNA	decreases^expression	11227219
2,6-dichloro-4-nitrophenol	C015802	618-80-4	CASP3	836	Homo sapiens	9606	2,6-dichloro-4-nitrophenol results in increased activity of CASP3 protein	increases^activity	11227219
2,6-dichloro-4-nitrophenol	C015802	618-80-4	DLSTP1	1744	Homo sapiens	9606	2,6-dichloro-4-nitrophenol results in decreased expression of DLSTP1 mRNA	decreases^expression	11227219
2,6-dichloro-4-nitrophenol	C015802	618-80-4	FH	2271	Homo sapiens	9606	2,6-dichloro-4-nitrophenol results in decreased expression of FH mRNA	decreases^expression	11227219
2,6-dichloro-4-nitrophenol	C015802	618-80-4	GAPDH	2597	Homo sapiens	9606	2,6-dichloro-4-nitrophenol results in increased expression of GAPDH mRNA	increases^expression	11227219
2,6-dichloro-4-nitrophenol	C015802	618-80-4	H2AFX	3014	Homo sapiens	9606	2,6-dichloro-4-nitrophenol results in decreased expression of H2AFX mRNA	decreases^expression	11227219
2,6-dichloro-4-nitrophenol	C015802	618-80-4	IDH3A	3419	Homo sapiens	9606	2,6-dichloro-4-nitrophenol results in decreased expression of IDH3A mRNA	decreases^expression	11227219
2,6-dichloro-4-nitrophenol	C015802	618-80-4	MDH1	4190	Homo sapiens	9606	2,6-dichloro-4-nitrophenol results in decreased expression of MDH1 mRNA	decreases^expression	11227219
2,6-dichloro-4-nitrophenol	C015802	618-80-4	PDHA1	5160	Homo sapiens	9606	2,6-dichloro-4-nitrophenol results in decreased expression of PDHA1 mRNA	decreases^expression	11227219
2,6-dichloro-4-nitrophenol	C015802	618-80-4	RPL13A	23521	Homo sapiens	9606	2,6-dichloro-4-nitrophenol results in increased expression of RPL13A mRNA	increases^expression	11227219
2,6-dichloro-4-nitrophenol	C015802	618-80-4	RPS3	6188	Homo sapiens	9606	2,6-dichloro-4-nitrophenol results in increased expression of RPS3 mRNA	increases^expression	11227219
2,6-dichloro-4-nitrophenol	C015802	618-80-4	SDHA	6389	Homo sapiens	9606	2,6-dichloro-4-nitrophenol results in decreased expression of SDHA mRNA	decreases^expression	11227219
2,6-dichloro-4-nitrophenol	C015802	618-80-4	SDHB	6390	Homo sapiens	9606	2,6-dichloro-4-nitrophenol results in decreased expression of SDHB mRNA	decreases^expression	11227219
2,6-dichloro-4-nitrophenol	C015802	618-80-4	SDHD	6392	Homo sapiens	9606	2,6-dichloro-4-nitrophenol results in decreased expression of SDHD mRNA	decreases^expression	11227219
2,6-dichloro-4-nitrophenol	C015802	618-80-4	SULT1A1	6817	Homo sapiens	9606	2,6-dichloro-4-nitrophenol inhibits the reaction [SULT1A1 protein results in increased sulfation of 4-nitrophenol]	decreases^reaction|increases^sulfation	11425650|15531517
2,6-dichloro-4-nitrophenol	C015802	618-80-4	SULT1A3	6818	Homo sapiens	9606	[2,6-dichloro-4-nitrophenol co-treated with SULT1A3 protein] results in decreased sulfation of Ethinyl Estradiol	affects^cotreatment|decreases^sulfation	15483196
2,6-dichloro-4-nitrophenol	C015802	618-80-4	SULT1E1	6783	Homo sapiens	9606	[2,6-dichloro-4-nitrophenol co-treated with SULT1E1 protein] results in decreased sulfation of Ethinyl Estradiol	affects^cotreatment|decreases^sulfation	15483196
2,6-dichloro-4-nitrophenol	C015802	618-80-4	TUBA1B	10376	Homo sapiens	9606	2,6-dichloro-4-nitrophenol results in increased expression of TUBA1B mRNA	increases^expression	11227219
2,6-dichloro-4-nitrophenol	C015802	618-80-4	UBC	7316	Homo sapiens	9606	2,6-dichloro-4-nitrophenol results in increased expression of UBC mRNA	increases^expression	11227219
2,6-dihydroxyanthraquinone	C034889	84-60-6	ALB	213	Homo sapiens	9606	2,6-dihydroxyanthraquinone binds to ALB protein	affects^binding	16404478
2,6-dihydroxyanthraquinone	C034889	84-60-6	CYP1A1	1543	Homo sapiens	9606	2,6-dihydroxyanthraquinone results in increased expression of CYP1A1 mRNA	increases^expression	11502733
2,6-dihydroxyanthraquinone	C034889	84-60-6	CYP1B1	1545	Homo sapiens	9606	2,6-dihydroxyanthraquinone results in increased expression of CYP1B1 mRNA	increases^expression	11502733
2,6-dihydroxyanthraquinone	C034889	84-60-6	UGT1A1	54658	Homo sapiens	9606	UGT1A1 protein results in increased glucuronidation of 2,6-dihydroxyanthraquinone	increases^glucuronidation	14557274|12756209
2,6-dihydroxyanthraquinone	C034889	84-60-6	UGT1A10	54575	Homo sapiens	9606	UGT1A10 protein results in increased glucuronidation of 2,6-dihydroxyanthraquinone	increases^glucuronidation	14557274
2,6-dihydroxyanthraquinone	C034889	84-60-6	UGT1A7	54577	Homo sapiens	9606	UGT1A7 protein results in increased glucuronidation of 2,6-dihydroxyanthraquinone	increases^glucuronidation	14557274
2,6-dihydroxyanthraquinone	C034889	84-60-6	UGT1A8	54576	Homo sapiens	9606	UGT1A8 protein results in increased glucuronidation of 2,6-dihydroxyanthraquinone	increases^glucuronidation	14557274
2,6-dihydroxyanthraquinone	C034889	84-60-6	UGT1A9	54600	Homo sapiens	9606	UGT1A9 protein results in increased glucuronidation of 2,6-dihydroxyanthraquinone	increases^glucuronidation	14557274
2,6-diisocyanatotoluene	C026942	1991-08-07	ALB	213	Homo sapiens	9606	2,6-diisocyanatotoluene binds to ALB protein	affects^binding	9124697
2,6-dimethylnaphthalene	C028519	581-42-0	CYP1A2	1544	Homo sapiens	9606	2,6-dimethylnaphthalene results in decreased activity of CYP1A2 protein	decreases^activity	15916432
2,6-dimethylnaphthalene	C028519	581-42-0	CYP2A6	1548	Homo sapiens	9606	CYP2A6 protein results in increased oxidation of 2,6-dimethylnaphthalene	increases^oxidation	17156750
2,6-dimethylnaphthalene	C028519	581-42-0	CYP2E1	1571	Homo sapiens	9606	CYP2E1 protein results in increased oxidation of 2,6-dimethylnaphthalene	increases^oxidation	17156750
2,6-dinitrotoluene	C023514	606-20-2	DDIT3	1649	Homo sapiens	9606	2,6-dinitrotoluene results in increased expression of DDIT3 protein	increases^expression	16705839
2,6-dinitrotoluene	C023514	606-20-2	FOS	2353	Homo sapiens	9606	2,6-dinitrotoluene results in increased expression of FOS protein	increases^expression	16705839
2,6-dinitrotoluene	C023514	606-20-2	GADD45A	1647	Homo sapiens	9606	2,6-dinitrotoluene results in increased expression of GADD45A protein	increases^expression	16705839
2,6-di-tert-butylphenol	C035407	128-39-2	CA1	759	Homo sapiens	9606	2,6-di-tert-butylphenol analog results in decreased activity of CA1 protein	decreases^activity	19231207
2,6-di-tert-butylphenol	C035407	128-39-2	CA2	760	Homo sapiens	9606	2,6-di-tert-butylphenol analog results in decreased activity of CA2 protein	decreases^activity	19231207
2,6-xylenol	C036531	576-26-1	CA1	759	Homo sapiens	9606	2,6-xylenol analog results in decreased activity of CA1 protein	decreases^activity	19231207
2,6-xylenol	C036531	576-26-1	CA2	760	Homo sapiens	9606	2,6-xylenol analog results in decreased activity of CA2 protein	decreases^activity	19231207
2,6-xylenol	C036531	576-26-1	SCN4A	6329	Homo sapiens	9606	2,6-xylenol binds to and results in decreased activity of SCN4A protein	affects^binding|decreases^activity	14662728
2,6-xylidine	C007766	87-62-7	CYP2A6	1548	Homo sapiens	9606	CYP2A6 protein results in increased hydroxylation of 2,6-xylidine	increases^hydroxylation	11409937
2,6-xylidine	C007766	87-62-7	CYP2E1	1571	Homo sapiens	9606	CYP2E1 protein affects the metabolism of 2,6-xylidine metabolite	affects^metabolic processing	11409937
2',7'-bis(carboxyethyl)-5(6)-carboxyfluorescein	C043829	85138-49-4	ABCC4	10257	Homo sapiens	9606	Mefloquine inhibits the reaction [ABCC4 protein affects the export of 2',7'-bis(carboxyethyl)-5(6)-carboxyfluorescein]	affects^export|decreases^reaction	16004972
2',7'-bis(carboxyethyl)-5(6)-carboxyfluorescein	C043829	85138-49-4	ABCC5	10057	Homo sapiens	9606	ABCC5 protein results in increased export of 2',7'-bis(carboxyethyl)-5(6)-carboxyfluorescein	increases^export	16156793
2',7'-bis-(carboxypropyl)-5(6)-carboxyfluorescein	C473073		ABCC1	4363	Homo sapiens	9606	3,3',4,5'-tetrahydroxystilbene inhibits the reaction [ABCC1 protein results in increased transport of 2',7'-bis-(carboxypropyl)-5(6)-carboxyfluorescein]	decreases^reaction|increases^transport	16827148
2,7-dinitrofluorene	C085049	5405-53-8	CYP1A1	1543	Homo sapiens	9606	2,7-dinitrofluorene inhibits the reaction [Tetrachlorodibenzodioxin results in increased activity of CYP1A1 protein]	decreases^reaction|increases^activity	18493746
2,7-dinitrofluorene	C085049	5405-53-8	CYP1A2	1544	Homo sapiens	9606	2,7-dinitrofluorene inhibits the reaction [Tetrachlorodibenzodioxin results in increased activity of CYP1A2 protein]	decreases^reaction|increases^activity	18493746
27-hydroxy-4-cholesten-3-one	C486873		HMGCR	3156	Homo sapiens	9606	27-hydroxy-4-cholesten-3-one results in decreased activity of HMGCR protein	decreases^activity	7751816
27-hydroxycholesterol	C076996	20380-11-4	ABCA1	19	Homo sapiens	9606	27-hydroxycholesterol results in increased expression of ABCA1 mRNA	increases^expression	18841091|15148325
27-hydroxycholesterol	C076996	20380-11-4	ABCG1	9619	Homo sapiens	9606	27-hydroxycholesterol results in increased expression of ABCG1 protein	increases^expression	17088262
27-hydroxycholesterol	C076996	20380-11-4	APP	351	Homo sapiens	9606	27-hydroxycholesterol results in decreased metabolism of and results in decreased secretion of APP protein	decreases^metabolic processing|decreases^secretion	15148325
27-hydroxycholesterol	C076996	20380-11-4	BACE1	23621	Homo sapiens	9606	27-hydroxycholesterol results in increased expression of BACE1 protein	increases^expression	19126211
27-hydroxycholesterol	C076996	20380-11-4	CES1	1066	Homo sapiens	9606	27-hydroxycholesterol inhibits the reaction [CES1 protein results in increased metabolism of bioresmethrin]	decreases^reaction|increases^metabolic processing	19761868
27-hydroxycholesterol	C076996	20380-11-4	CXCL12	6387	Homo sapiens	9606	27-hydroxycholesterol results in increased expression of CXCL12 mRNA	increases^expression	17872378
27-hydroxycholesterol	C076996	20380-11-4	CYP27A1	1593	Homo sapiens	9606	CYP27A1 protein results in increased abundance of 27-hydroxycholesterol	increases^abundance	12119285
27-hydroxycholesterol	C076996	20380-11-4	CYP7A1	1581	Homo sapiens	9606	CYP7A1 protein results in increased metabolism of 27-hydroxycholesterol	increases^metabolic processing	10882719
27-hydroxycholesterol	C076996	20380-11-4	CYP7B1	9420	Homo sapiens	9606	CYP7B1 protein results in increased hydroxylation of 27-hydroxycholesterol	increases^hydroxylation	10588945
27-hydroxycholesterol	C076996	20380-11-4	E2F1	1869	Homo sapiens	9606	27-hydroxycholesterol results in increased expression of E2F1 mRNA	increases^expression	17872378
27-hydroxycholesterol	C076996	20380-11-4	ERBB4	2066	Homo sapiens	9606	27-hydroxycholesterol results in decreased expression of ERBB4 mRNA	decreases^expression	17872378
27-hydroxycholesterol	C076996	20380-11-4	ESR1	2099	Homo sapiens	9606	27-hydroxycholesterol binds to and affects the folding of and results in increased activity of ESR1 protein	affects^binding|affects^folding|increases^activity	17872378
27-hydroxycholesterol	C076996	20380-11-4	ESR2	2100	Homo sapiens	9606	27-hydroxycholesterol binds to and affects the folding of and results in increased activity of ESR2 protein	affects^binding|affects^folding|increases^activity	17872378
27-hydroxycholesterol	C076996	20380-11-4	HMGCR	3156	Homo sapiens	9606	27-hydroxycholesterol metabolite results in decreased activity of HMGCR protein	decreases^activity	9059514
27-hydroxycholesterol	C076996	20380-11-4	ICAM1	3383	Homo sapiens	9606	27-hydroxycholesterol results in increased expression of ICAM1 mRNA	increases^expression	19426978
27-hydroxycholesterol	C076996	20380-11-4	IL1B	3553	Homo sapiens	9606	27-hydroxycholesterol promotes the reaction [Lipopolysaccharides results in increased secretion of IL1B protein]	increases^reaction|increases^secretion	11851725
27-hydroxycholesterol	C076996	20380-11-4	IL6	3569	Homo sapiens	9606	27-hydroxycholesterol results in increased secretion of IL6 protein	increases^secretion	11851725
27-hydroxycholesterol	C076996	20380-11-4	IL8	3576	Homo sapiens	9606	27-hydroxycholesterol results in increased expression of IL8 mRNA	increases^expression	19426978
27-hydroxycholesterol	C076996	20380-11-4	LCAT	3931	Homo sapiens	9606	LCAT protein results in increased metabolism of 27-hydroxycholesterol	increases^metabolic processing	7744831
27-hydroxycholesterol	C076996	20380-11-4	LDLR	3949	Homo sapiens	9606	27-hydroxycholesterol results in decreased activity of LDLR protein	decreases^activity	8820113
27-hydroxycholesterol	C076996	20380-11-4	NR5A1	2516	Homo sapiens	9606	27-hydroxycholesterol promotes the reaction [NR5A1 protein results in increased expression of STAR protein]	increases^expression|increases^reaction	9804848
27-hydroxycholesterol	C076996	20380-11-4	PGR	5241	Homo sapiens	9606	27-hydroxycholesterol results in increased expression of PGR mRNA	increases^expression	17872378
27-hydroxycholesterol	C076996	20380-11-4	SELE	6401	Homo sapiens	9606	27-hydroxycholesterol results in increased expression of SELE mRNA	increases^expression	19426978
27-hydroxycholesterol	C076996	20380-11-4	SMPD2	6610	Homo sapiens	9606	27-hydroxycholesterol results in decreased activity of SMPD2 protein	decreases^activity	15261762
27-hydroxycholesterol	C076996	20380-11-4	SNCA	6622	Homo sapiens	9606	27-hydroxycholesterol results in increased expression of SNCA mRNA	increases^expression	18841091
27-hydroxycholesterol	C076996	20380-11-4	STAR	6770	Homo sapiens	9606	27-hydroxycholesterol promotes the reaction [NR5A1 protein results in increased expression of STAR protein]	increases^expression|increases^reaction	9804848
27-hydroxycholesterol	C076996	20380-11-4	TFF1	7031	Homo sapiens	9606	27-hydroxycholesterol promotes the reaction [ESR1 protein binds to TFF1 promoter]	affects^binding|increases^reaction	17872378
27-hydroxycholesterol	C076996	20380-11-4	TGFB1	7040	Homo sapiens	9606	[TGFB1 protein results in increased expression of CYP27A1 protein] which results in increased abundance of 27-hydroxycholesterol	increases^abundance|increases^expression	15708352
27-hydroxycholesterol	C076996	20380-11-4	VCAM1	7412	Homo sapiens	9606	27-hydroxycholesterol results in increased expression of VCAM1 mRNA	increases^expression	19426978
27-hydroxycholesterol	C076996	20380-11-4	WISP2	8839	Homo sapiens	9606	27-hydroxycholesterol results in increased expression of WISP2 mRNA	increases^expression	17872378
2-(acetoxyamino)-1-methyl-6-phenylimidazo(4,5-b)pyridine	C096092		GSTA1	2938	Homo sapiens	9606	GSTA1 protein affects the metabolism of and results in decreased activity of 2-(acetoxyamino)-1-methyl-6-phenylimidazo(4,5-b)pyridine	affects^metabolic processing|decreases^activity	15797627|8069858|11535243
2-(acetoxyamino)-1-methyl-6-phenylimidazo(4,5-b)pyridine	C096092		GSTP1	2950	Homo sapiens	9606	GSTP1 protein affects the metabolism of and results in decreased activity of 2-(acetoxyamino)-1-methyl-6-phenylimidazo(4,5-b)pyridine	affects^metabolic processing|decreases^activity	8069858
2-acetylbenzothiophene-S-oxide	C527068		ALB	213	Homo sapiens	9606	2-acetylbenzothiophene-S-oxide binds to and results in increased alkylation of ALB protein	affects^binding|increases^alkylation	17944539
2-(acetyloxy)benzoic acid 6-(nitrooxymethyl)-2-phenylmethyl ester	C488175		CASP3	836	Homo sapiens	9606	2-(acetyloxy)benzoic acid 6-(nitrooxymethyl)-2-phenylmethyl ester results in increased expression of CASP3 protein	increases^expression	15201807
2-allylphenol	C099328	1745-81-9	GSTA1	2938	Homo sapiens	9606	2-allylphenol results in decreased activity of GSTA1 protein	decreases^activity	8620581
2-allylphenol	C099328	1745-81-9	GSTM1	2944	Homo sapiens	9606	2-allylphenol results in decreased activity of GSTM1 protein	decreases^activity	8620581
2-allylphenol	C099328	1745-81-9	GSTP1	2950	Homo sapiens	9606	2-allylphenol results in decreased activity of GSTP1 protein	decreases^activity	8620581
2-amino-1-methyl-6-(4-hydroxyphenyl)imidazo(4,5-b)pyridine	C077584	126861-72-1	SULT1A1	6817	Homo sapiens	9606	SULT1A1 protein results in increased sulfation of 2-amino-1-methyl-6-(4-hydroxyphenyl)imidazo(4,5-b)pyridine	increases^sulfation	11181495
2-amino-1-methyl-6-(4-hydroxyphenyl)imidazo(4,5-b)pyridine	C077584	126861-72-1	SULT1A3	6818	Homo sapiens	9606	SULT1A3 protein results in increased sulfation of 2-amino-1-methyl-6-(4-hydroxyphenyl)imidazo(4,5-b)pyridine	increases^sulfation	11181495
2-amino-1-methyl-6-phenylimidazo(4,5-b)pyridine	C049584	105650-23-5	ABCG2	9429	Homo sapiens	9606	ABCG2 protein affects the transport of 2-amino-1-methyl-6-phenylimidazo(4,5-b)pyridine	affects^transport	15365089
2-amino-1-methyl-6-phenylimidazo(4,5-b)pyridine	C049584	105650-23-5	CDKN1A	1026	Homo sapiens	9606	2-amino-1-methyl-6-phenylimidazo(4,5-b)pyridine results in increased expression of CDKN1A protein	increases^expression	15635149
2-amino-1-methyl-6-phenylimidazo(4,5-b)pyridine	C049584	105650-23-5	CYP1A2	1544	Homo sapiens	9606	CYP1A2 protein polymorphism results in increased activity of 2-amino-1-methyl-6-phenylimidazo(4,5-b)pyridine	increases^activity	15110095
2-amino-1-methyl-6-phenylimidazo(4,5-b)pyridine	C049584	105650-23-5	DDC	1644	Homo sapiens	9606	2-amino-1-methyl-6-phenylimidazo(4,5-b)pyridine results in decreased activity of DDC protein	decreases^activity	2243617
2-amino-1-methyl-6-phenylimidazo(4,5-b)pyridine	C049584	105650-23-5	GSTA1	2938	Homo sapiens	9606	GSTA1 gene polymorphism affects the susceptibility to 2-amino-1-methyl-6-phenylimidazo(4,5-b)pyridine	affects^response to substance	14601045
2-amino-1-methyl-6-phenylimidazo(4,5-b)pyridine	C049584	105650-23-5	HBB	3043	Homo sapiens	9606	HBB protein affects the susceptibility to 2-amino-1-methyl-6-phenylimidazo(4,5-b)pyridine	affects^response to substance	14691983
2-amino-1-methyl-6-phenylimidazo(4,5-b)pyridine	C049584	105650-23-5	HIST3H3	8290	Homo sapiens	9606	[2-amino-1-methyl-6-phenylimidazo(4,5-b)pyridine co-treated with 4-biphenylamine co-treated with Benzo(a)pyrene co-treated with Tetrachlorodibenzodioxin] results in decreased methylation of HIST3H3 protein	affects^cotreatment|decreases^methylation	17468514
2-amino-1-methyl-6-phenylimidazo(4,5-b)pyridine	C049584	105650-23-5	KDM1A	23028	Homo sapiens	9606	[2-amino-1-methyl-6-phenylimidazo(4,5-b)pyridine co-treated with 4-biphenylamine co-treated with Benzo(a)pyrene] affects the localization of KDM1A protein	affects^cotreatment|affects^localization	17468514
2-amino-1-methyl-6-phenylimidazo(4,5-b)pyridine	C049584	105650-23-5	MDM2	4193	Homo sapiens	9606	2-amino-1-methyl-6-phenylimidazo(4,5-b)pyridine results in increased expression of MDM2 protein	increases^expression	15635149
2-amino-1-methyl-6-phenylimidazo(4,5-b)pyridine	C049584	105650-23-5	NAT2	10	Homo sapiens	9606	NAT2 protein polymorphism results in increased activity of 2-amino-1-methyl-6-phenylimidazo(4,5-b)pyridine	increases^activity	15110095
2-amino-1-methyl-6-phenylimidazo(4,5-b)pyridine	C049584	105650-23-5	PTGS1	5742	Homo sapiens	9606	PTGS1 protein results in increased metabolism of 2-amino-1-methyl-6-phenylimidazo(4,5-b)pyridine	increases^metabolic processing	11159734
2-amino-1-methyl-6-phenylimidazo(4,5-b)pyridine	C049584	105650-23-5	PTGS2	5743	Homo sapiens	9606	PTGS2 protein results in increased metabolism of 2-amino-1-methyl-6-phenylimidazo(4,5-b)pyridine	increases^metabolic processing	11159734
2-amino-1-methyl-6-phenylimidazo(4,5-b)pyridine	C049584	105650-23-5	RB1	5925	Homo sapiens	9606	2-amino-1-methyl-6-phenylimidazo(4,5-b)pyridine results in decreased phosphorylation of RB1 protein	decreases^phosphorylation	15635149
2-amino-1-methyl-6-phenylimidazo(4,5-b)pyridine	C049584	105650-23-5	SULT1A1	6817	Homo sapiens	9606	2-amino-1-methyl-6-phenylimidazo(4,5-b)pyridine inhibits the reaction [SULT1A1 protein results in increased sulfation of Estradiol]	decreases^reaction|increases^sulfation	17433394
2-amino-1-methyl-6-phenylimidazo(4,5-b)pyridine	C049584	105650-23-5	TP53	7157	Homo sapiens	9606	2-amino-1-methyl-6-phenylimidazo(4,5-b)pyridine results in increased expression of TP53 protein	increases^expression	15635149
2-amino-1-methyl-6-phenylimidazo(4,5-b)pyridine	C049584	105650-23-5	UGT1A1	54658	Homo sapiens	9606	UGT1A1 protein results in increased glucuronidation of and results in decreased activity of 2-amino-1-methyl-6-phenylimidazo(4,5-b)pyridine	decreases^activity|increases^glucuronidation	15708579
2-amino-3,4-dimethylimidazo(4,5-f)quinoline	C036989	77094-11-2	CYP1A2	1544	Homo sapiens	9606	CYP1A2 protein affects the metabolism of 2-amino-3,4-dimethylimidazo(4,5-f)quinoline	affects^metabolic processing	2655891
2-amino-3,8-dimethylimidazo(4,5-f)quinoxaline	C036990	77500-04-0	CYP1A2	1544	Homo sapiens	9606	CYP1A2 protein affects the metabolism of 2-amino-3,8-dimethylimidazo(4,5-f)quinoxaline	affects^metabolic processing	2655891
2-amino-3,8-dimethylimidazo(4,5-f)quinoxaline	C036990	77500-04-0	PTGS1	5742	Homo sapiens	9606	PTGS1 protein results in increased metabolism of 2-amino-3,8-dimethylimidazo(4,5-f)quinoxaline	increases^metabolic processing	11159734
2-amino-3,8-dimethylimidazo(4,5-f)quinoxaline	C036990	77500-04-0	PTGS2	5743	Homo sapiens	9606	PTGS2 protein results in increased metabolism of 2-amino-3,8-dimethylimidazo(4,5-f)quinoxaline	increases^metabolic processing	11159734
2-amino-3-methyl-9H-pyrido(2,3-b)indole	C017821	68006-83-7	CYP1A2	1544	Homo sapiens	9606	CYP1A2 protein results in increased activity of and results in increased hydroxylation of 2-amino-3-methyl-9H-pyrido(2,3-b)indole	increases^activity|increases^hydroxylation	14729582
2-amino-3-methyl-9H-pyrido(2,3-b)indole	C017821	68006-83-7	DDC	1644	Homo sapiens	9606	2-amino-3-methyl-9H-pyrido(2,3-b)indole results in decreased activity of DDC protein	decreases^activity	2243617
2-amino-3-methyl-9H-pyrido(2,3-b)indole	C017821	68006-83-7	NAT2	10	Homo sapiens	9606	NAT2 protein results in increased activity of 2-amino-3-methyl-9H-pyrido(2,3-b)indole	increases^activity	14729582
2-amino-3-methyl-9H-pyrido(2,3-b)indole	C017821	68006-83-7	SULT1A1	6817	Homo sapiens	9606	SULT1A1 protein results in increased activity of and results in increased sulfation of 2-amino-3-methyl-9H-pyrido(2,3-b)indole	increases^activity|increases^sulfation	14729582
2-amino-3-methyl-9H-pyrido(2,3-b)indole	C017821	68006-83-7	SULT1A2	6799	Homo sapiens	9606	SULT1A2 protein results in increased activity of 2-amino-3-methyl-9H-pyrido(2,3-b)indole	increases^activity	14729582
2-amino-3-methyl-9H-pyrido(2,3-b)indole	C017821	68006-83-7	SULT1B1	27284	Homo sapiens	9606	SULT1B1 protein results in increased activity of 2-amino-3-methyl-9H-pyrido(2,3-b)indole	increases^activity	14729582
2-amino-3-methyl-9H-pyrido(2,3-b)indole	C017821	68006-83-7	SULT1C2	6819	Homo sapiens	9606	SULT1C2 protein results in increased activity of 2-amino-3-methyl-9H-pyrido(2,3-b)indole	increases^activity	14729582
2-amino-3-methylimidazo(4,5-f)quinoline	C029216	76180-96-6	CYP1A2	1544	Homo sapiens	9606	CYP1A2 protein affects the metabolism of 2-amino-3-methylimidazo(4,5-f)quinoline	affects^metabolic processing	2655891
2-amino-3-methylimidazo(4,5-f)quinoline	C029216	76180-96-6	PTGS1	5742	Homo sapiens	9606	PTGS1 protein results in increased metabolism of 2-amino-3-methylimidazo(4,5-f)quinoline	increases^metabolic processing	11159734
2-amino-3-methylimidazo(4,5-f)quinoline	C029216	76180-96-6	PTGS2	5743	Homo sapiens	9606	PTGS2 protein results in increased metabolism of 2-amino-3-methylimidazo(4,5-f)quinoline	increases^metabolic processing	11159734
2-amino-4,6-dinitrotoluene	C035208	35572-78-2	TP53	7157	Homo sapiens	9606	2-amino-4,6-dinitrotoluene results in increased activity of TP53 protein	increases^activity	14577614
2-amino-4-hydroxy-6-formylpteridine	C005926	712-30-1	BID	637	Homo sapiens	9606	2-amino-4-hydroxy-6-formylpteridine results in decreased expression of BID protein	decreases^expression	16019850
2-amino-4-hydroxy-6-formylpteridine	C005926	712-30-1	CASP3	836	Homo sapiens	9606	2-amino-4-hydroxy-6-formylpteridine results in increased activity of CASP3 protein	increases^activity	16019850
2-amino-4-hydroxy-6-formylpteridine	C005926	712-30-1	CASP8	841	Homo sapiens	9606	2-amino-4-hydroxy-6-formylpteridine results in increased activity of CASP8 protein	increases^activity	16019850
2-amino-4-hydroxy-6-formylpteridine	C005926	712-30-1	CYCS	54205	Homo sapiens	9606	2-amino-4-hydroxy-6-formylpteridine affects the localization of CYCS protein	affects^localization	16019850
2-amino-4-hydroxy-6-formylpteridine	C005926	712-30-1	PRKCD	5580	Homo sapiens	9606	2-amino-4-hydroxy-6-formylpteridine affects the localization of PRKCD protein	affects^localization	16019850
2-amino-4-phenylbutyric acid	C014328	7636-28-4	CFTR	1080	Homo sapiens	9606	2-amino-4-phenylbutyric acid results in decreased activity of CFTR protein	decreases^activity	15857825
2-amino-6-(2-(cyclopropylmethoxy)-6-hydroxyphenyl)-4-piperidin-4-yl nicotinonitrile	C501280		BCL2L1	598	Homo sapiens	9606	2-amino-6-(2-(cyclopropylmethoxy)-6-hydroxyphenyl)-4-piperidin-4-yl nicotinonitrile results in decreased expression of BCL2L1 mRNA	decreases^expression	15756023
2-amino-6-(2-(cyclopropylmethoxy)-6-hydroxyphenyl)-4-piperidin-4-yl nicotinonitrile	C501280		BIRC2	329	Homo sapiens	9606	2-amino-6-(2-(cyclopropylmethoxy)-6-hydroxyphenyl)-4-piperidin-4-yl nicotinonitrile results in decreased expression of BIRC2 mRNA	decreases^expression	15756023
2-amino-6-(2-(cyclopropylmethoxy)-6-hydroxyphenyl)-4-piperidin-4-yl nicotinonitrile	C501280		CCND1	595	Homo sapiens	9606	2-amino-6-(2-(cyclopropylmethoxy)-6-hydroxyphenyl)-4-piperidin-4-yl nicotinonitrile results in decreased expression of CCND1 mRNA	decreases^expression	15756023
2-amino-6-(2-(cyclopropylmethoxy)-6-hydroxyphenyl)-4-piperidin-4-yl nicotinonitrile	C501280		NFKB	373533	Homo sapiens	9606	2-amino-6-(2-(cyclopropylmethoxy)-6-hydroxyphenyl)-4-piperidin-4-yl nicotinonitrile results in decreased activity of NFKB protein	decreases^activity	15756023
2-amino-6-(2-(cyclopropylmethoxy)-6-hydroxyphenyl)-4-piperidin-4-yl nicotinonitrile	C501280		NFKBIA	4792	Homo sapiens	9606	2-amino-6-(2-(cyclopropylmethoxy)-6-hydroxyphenyl)-4-piperidin-4-yl nicotinonitrile results in decreased phosphorylation of NFKBIA protein	decreases^phosphorylation	15756023
2-amino-6-(2-(cyclopropylmethoxy)-6-hydroxyphenyl)-4-piperidin-4-yl nicotinonitrile	C501280		RELA	5970	Homo sapiens	9606	2-amino-6-(2-(cyclopropylmethoxy)-6-hydroxyphenyl)-4-piperidin-4-yl nicotinonitrile results in decreased phosphorylation of RELA protein	decreases^phosphorylation	15756023
2-amino-6-(2-(cyclopropylmethoxy)-6-hydroxyphenyl)-4-piperidin-4-yl nicotinonitrile	C501280		XIAP	331	Homo sapiens	9606	2-amino-6-(2-(cyclopropylmethoxy)-6-hydroxyphenyl)-4-piperidin-4-yl nicotinonitrile results in decreased expression of XIAP mRNA	decreases^expression	15756023
2-amino-6-methyldipyrido(1,2-a-3',2'-d)imidazole	C023785	67730-11-4	CYP1A2	1544	Homo sapiens	9606	CYP1A2 protein affects the metabolism of 2-amino-6-methyldipyrido(1,2-a-3',2'-d)imidazole	affects^metabolic processing	2655891
2-aminodiphenyl	C014970	90-41-5	OGG1	4968	Homo sapiens	9606	2-aminodiphenyl results in decreased expression of OGG1 mRNA	decreases^expression	16112689
2-aminoethoxydiphenyl borate	C109986		CASP12	100506742	Homo sapiens	9606	[Verapamil co-treated with Ruthenium Red co-treated with 2-aminoethoxydiphenyl borate] inhibits the reaction [Trichlorfon results in increased cleavage of and results in increased activity of CASP12 protein]	affects^cotreatment|decreases^reaction|increases^activity|increases^cleavage	19631781
2-aminoethoxydiphenyl borate	C109986		CASP3	836	Homo sapiens	9606	[Verapamil co-treated with Ruthenium Red co-treated with 2-aminoethoxydiphenyl borate] inhibits the reaction [Trichlorfon results in increased cleavage of and results in increased activity of CASP3 protein]	affects^cotreatment|decreases^reaction|increases^activity|increases^cleavage	19631781
2-aminoethoxydiphenyl borate	C109986		CCL1	6346	Homo sapiens	9606	2-aminoethoxydiphenyl borate inhibits the reaction [Benzo(a)pyrene results in increased expression of CCL1 mRNA]	decreases^reaction|increases^expression	16679317
2-aminoethoxydiphenyl borate	C109986		CXCR2	3579	Homo sapiens	9606	2-aminoethoxydiphenyl borate inhibits the reaction [IL8 protein results in increased activity of CXCR2 protein]	decreases^reaction|increases^activity	12975484
2-aminoethoxydiphenyl borate	C109986		CYP1A1	1543	Homo sapiens	9606	2-aminoethoxydiphenyl borate inhibits the reaction [Benzo(a)pyrene results in increased expression of CYP1A1 mRNA]	decreases^reaction|increases^expression	16679317
2-aminoethoxydiphenyl borate	C109986		IL8	3576	Homo sapiens	9606	2-aminoethoxydiphenyl borate inhibits the reaction [IL8 protein results in increased activity of CXCR2 protein]	decreases^reaction|increases^activity	12975484
2-aminoethoxydiphenyl borate	C109986		PLA2G4A	5321	Homo sapiens	9606	[Nifedipine co-treated with 2-aminoethoxydiphenyl borate] inhibits the reaction [Tetrachlorodibenzodioxin results in increased expression of PLA2G4A mRNA]	affects^cotreatment|decreases^reaction|increases^expression	18938131
2-aminoethoxydiphenyl borate	C109986		PTGS2	5743	Homo sapiens	9606	2-aminoethoxydiphenyl borate inhibits the reaction [Tetrachlorodibenzodioxin results in increased expression of PTGS2 mRNA]	decreases^reaction|increases^expression	18388244
2-aminoethoxydiphenyl borate	C109986		SERPINB2	5055	Homo sapiens	9606	2-aminoethoxydiphenyl borate inhibits the reaction [Tetrachlorodibenzodioxin results in increased expression of SERPINB2 mRNA]	decreases^reaction|increases^expression	18388244
2-aminoethoxydiphenyl borate	C109986		VEGFA	7422	Homo sapiens	9606	2-aminoethoxydiphenyl borate inhibits the reaction [Tetrachlorodibenzodioxin results in increased expression of VEGFA mRNA]	decreases^reaction|increases^expression	18388244
2-aminofluorene	C012177	153-78-6	CYP1A2	1544	Homo sapiens	9606	CYP1A2 protein affects the metabolism of 2-aminofluorene	affects^metabolic processing	2655891
2-aminofluorene	C012177	153-78-6	MPO	4353	Homo sapiens	9606	MPO protein affects the metabolism of 2-aminofluorene	affects^metabolic processing	9288889
2-aminofluorene	C012177	153-78-6	NAT1	9	Homo sapiens	9606	NAT1 protein results in increased acetylation of 2-aminofluorene	increases^acetylation	15796204|16003948|15627487
2-aminofluorene	C012177	153-78-6	NAT2	10	Homo sapiens	9606	NAT2 protein polymorphism results in increased acetylation of 2-aminofluorene	increases^acetylation	14722254
2-aminophenol	C027667	95-55-6	UGT2B11	10720	Homo sapiens	9606	UGT2B11 protein results in increased glucuronidation of 2-aminophenol	increases^glucuronidation	8333863
2-aminothiophenol	C005464	137-07-5	C1S	716	Homo sapiens	9606	2-aminothiophenol inhibits the reaction [C4A protein binds to C1S protein]	affects^binding|decreases^reaction	8435078
2-aminothiophenol	C005464	137-07-5	C4A	720	Homo sapiens	9606	2-aminothiophenol inhibits the reaction [C4A protein binds to C1S protein]	affects^binding|decreases^reaction	8435078
2-aminothiophenol	C005464	137-07-5	C4B	721	Homo sapiens	9606	2-aminothiophenol inhibits the reaction [C4B protein binds to C1S protein]	affects^binding|decreases^reaction	8435078
2-anisidine	C003898	90-04-0	CYP1A1	1543	Homo sapiens	9606	CYP1A1 protein results in increased oxidation of 2-anisidine	increases^oxidation	15828049
2-anisidine	C003898	90-04-0	CYP1A2	1544	Homo sapiens	9606	CYP1A2 protein results in increased oxidation of 2-anisidine	increases^oxidation	15828049
2-anisidine	C003898	90-04-0	CYP2A6	1548	Homo sapiens	9606	CYP2A6 protein results in increased oxidation of 2-anisidine	increases^oxidation	15828049
2-anisidine	C003898	90-04-0	CYP2B6	1555	Homo sapiens	9606	CYP2B6 protein results in increased oxidation of 2-anisidine	increases^oxidation	15828049
2-anisidine	C003898	90-04-0	CYP2D6	1565	Homo sapiens	9606	CYP2D6 protein results in increased oxidation of 2-anisidine	increases^oxidation	15828049
2-anisidine	C003898	90-04-0	CYP2E1	1571	Homo sapiens	9606	CYP2E1 protein results in increased oxidation of 2-anisidine	increases^oxidation	15828049
2-anisidine	C003898	90-04-0	CYP3A4	1576	Homo sapiens	9606	CYP3A4 protein results in increased oxidation of 2-anisidine	increases^oxidation	15828049
2-anisidine	C003898	90-04-0	NAT1	9	Homo sapiens	9606	NAT1 protein results in increased activity of 2-anisidine	increases^activity	15450435
2-anisidine	C003898	90-04-0	NAT2	10	Homo sapiens	9606	NAT2 protein results in increased activity of 2-anisidine	increases^activity	15450435
2-anthramine	C006593	613-13-8	CYB5	109672	Homo sapiens	9606	CYB5 protein promotes the reaction [CYP1A2 protein results in increased activity of 2-anthramine]	increases^activity|increases^reaction	15728263
2-anthramine	C006593	613-13-8	CYP1A2	1544	Homo sapiens	9606	CYB5 protein promotes the reaction [CYP1A2 protein results in increased activity of 2-anthramine]	increases^activity|increases^reaction	15728263
2-arachidonylglycerol	C094503	53847-30-6	CCL2	6347	Homo sapiens	9606	2-arachidonylglycerol results in increased expression of CCL2 protein	increases^expression	15115777
2-arachidonylglycerol	C094503	53847-30-6	CNR2	1269	Homo sapiens	9606	CNR2 protein affects the reaction [2-arachidonylglycerol results in increased expression of IL8 protein]	affects^reaction|increases^expression	15115777
2-arachidonylglycerol	C094503	53847-30-6	IL8	3576	Homo sapiens	9606	2-arachidonylglycerol analog results in increased expression of IL8 protein	increases^expression	15115777
2-arachidonylglycerol	C094503	53847-30-6	PTGS2	5743	Homo sapiens	9606	Ibuprofen inhibits the reaction [PTGS2 protein results in increased metabolism of 2-arachidonylglycerol]	decreases^reaction|increases^metabolic processing	18297109
2-benzoquinone	C025225	583-63-1	ALB	213	Homo sapiens	9606	Benzene promotes the reaction [2-benzoquinone binds to ALB protein]	affects^binding|increases^reaction	17366815
2'-benzoyloxycinnamaldehyde	C484327		ALB	213	Homo sapiens	9606	2'-benzoyloxycinnamaldehyde binds to ALB protein	affects^binding	16109627
2'-benzoyloxycinnamaldehyde	C484327		BCL2	596	Homo sapiens	9606	2'-benzoyloxycinnamaldehyde results in decreased expression of BCL2 protein	decreases^expression	14660655
2'-benzoyloxycinnamaldehyde	C484327		BCL2L2	599	Homo sapiens	9606	2'-benzoyloxycinnamaldehyde results in decreased expression of BCL2L2 protein	decreases^expression	14660655
2'-benzoyloxycinnamaldehyde	C484327		CASP3	836	Homo sapiens	9606	2'-benzoyloxycinnamaldehyde results in increased activity of CASP3 protein	increases^activity	14660655
2'-benzoyloxycinnamaldehyde	C484327		EGFR	1956	Homo sapiens	9606	2'-benzoyloxycinnamaldehyde results in increased phosphorylation of EGFR protein	increases^phosphorylation	14660655
2'-benzoyloxycinnamaldehyde	C484327		MAPK14	1432	Homo sapiens	9606	2'-benzoyloxycinnamaldehyde results in increased phosphorylation of MAPK14 protein	increases^phosphorylation	14660655
2'-benzoyloxycinnamaldehyde	C484327		PARP1	142	Homo sapiens	9606	2'-benzoyloxycinnamaldehyde results in increased cleavage of PARP1 protein	increases^cleavage	14660655
2-(beta-(3-iodo-4-hydroxyphenyl)ethylaminomethyl)tetralone	C048008	95034-25-6	ADRA1A	148	Homo sapiens	9606	2-(beta-(3-iodo-4-hydroxyphenyl)ethylaminomethyl)tetralone binds to ADRA1A protein	affects^binding	9570190
2-(beta-(3-iodo-4-hydroxyphenyl)ethylaminomethyl)tetralone	C048008	95034-25-6	ADRA1B	147	Homo sapiens	9606	2-(beta-(3-iodo-4-hydroxyphenyl)ethylaminomethyl)tetralone binds to ADRA1B protein	affects^binding	9570190
2-(beta-(3-iodo-4-hydroxyphenyl)ethylaminomethyl)tetralone	C048008	95034-25-6	ADRA1D	146	Homo sapiens	9606	2-(beta-(3-iodo-4-hydroxyphenyl)ethylaminomethyl)tetralone binds to ADRA1D protein	affects^binding	9570190
2-bromopalmitate	C022776	18263-25-7	CYP4A11	1579	Homo sapiens	9606	2-bromopalmitate results in increased expression of CYP4A11 mRNA	increases^expression	16712844
2-bromopalmitate	C022776	18263-25-7	FAS	355	Homo sapiens	9606	2-bromopalmitate results in decreased expression of FAS mRNA	decreases^expression	16712844
2-butanol	C043958	78-92-2	CHRNA2	1135	Homo sapiens	9606	2-butanol affects the reaction [Acetylcholine promotes the reaction [[CHRNA2 protein binds to CHRNB4 protein] which results in increased transport of Barium]]	affects^binding|affects^reaction|increases^reaction|increases^transport	11821649
2-butanol	C043958	78-92-2	CHRNB4	1143	Homo sapiens	9606	2-butanol affects the reaction [Acetylcholine promotes the reaction [[CHRNA2 protein binds to CHRNB4 protein] which results in increased transport of Barium]]	affects^binding|affects^reaction|increases^reaction|increases^transport	11821649
2-butanol	C043958	78-92-2	GH1	2688	Homo sapiens	9606	2-butanol affects the folding of GH1 protein	affects^folding	11064379
2-butenal	C012796	4170-30-3	AKR1B1	231	Homo sapiens	9606	AKR1B1 protein results in increased reduction of 2-butenal	increases^reduction	9890881
2-butenal	C012796	4170-30-3	AKR1B10	57016	Homo sapiens	9606	2-butenal affects the metabolism of AKR1B10 protein	affects^metabolic processing	17597105
2-butenal	C012796	4170-30-3	CSF2	1437	Homo sapiens	9606	2-butenal results in decreased secretion of CSF2 protein	decreases^secretion	17491020
2-butenal	C012796	4170-30-3	GSTP1	2950	Homo sapiens	9606	2-butenal binds to and results in decreased activity of GSTP1 protein	affects^binding|decreases^activity	9463521
2-butenal	C012796	4170-30-3	IFNG	3458	Homo sapiens	9606	2-butenal results in decreased secretion of IFNG protein	decreases^secretion	17491020
2-butenal	C012796	4170-30-3	IL10	3586	Homo sapiens	9606	2-butenal results in decreased secretion of IL10 protein	decreases^secretion	17491020
2-butenal	C012796	4170-30-3	IL2	3558	Homo sapiens	9606	2-butenal results in decreased secretion of IL2 protein	decreases^secretion	17491020
2-butenal	C012796	4170-30-3	TNF	7124	Homo sapiens	9606	2-butenal results in decreased secretion of TNF protein	decreases^secretion	17491020
2-butylamino-2-demethoxy-hypocrellin B	C437043		CDKN1A	1026	Homo sapiens	9606	2-butylamino-2-demethoxy-hypocrellin B results in increased expression of CDKN1A mRNA	increases^expression	17045927
2-butylamino-2-demethoxy-hypocrellin B	C437043		NOS3	4846	Homo sapiens	9606	2-butylamino-2-demethoxy-hypocrellin B results in increased activity of NOS3 protein	increases^activity	17045927
2-butylamino-2-demethoxy-hypocrellin B	C437043		TP53	7157	Homo sapiens	9606	2-butylamino-2-demethoxy-hypocrellin B results in increased expression of TP53 mRNA	increases^expression	17045927
2-chloro-5-nitrobenzanilide	C457499		BAX	581	Homo sapiens	9606	2-chloro-5-nitrobenzanilide inhibits the reaction [rosiglitazone results in increased expression of BAX protein]	decreases^reaction|increases^expression	17461445
2-chloro-5-nitrobenzanilide	C457499		BCL2	596	Homo sapiens	9606	2-chloro-5-nitrobenzanilide inhibits the reaction [rosiglitazone results in decreased expression of BCL2 protein]	decreases^expression|decreases^reaction	17461445
2-chloro-5-nitrobenzanilide	C457499		BSG	682	Homo sapiens	9606	2-chloro-5-nitrobenzanilide inhibits the reaction [pioglitazone inhibits the reaction [Tetradecanoylphorbol Acetate results in increased expression of BSG protein]]	decreases^reaction|increases^expression	17055343
2-chloro-5-nitrobenzanilide	C457499		CASP3	836	Homo sapiens	9606	2-chloro-5-nitrobenzanilide inhibits the reaction [8-bromo-7-methoxychrysin results in increased activity of CASP3 protein]	decreases^reaction|increases^activity	20632440
2-chloro-5-nitrobenzanilide	C457499		CCR2	729230	Homo sapiens	9606	[2-chloro-5-nitrobenzanilide binds to and results in decreased activity of PPARG protein] inhibits the reaction [Simvastatin results in decreased expression of CCR2 mRNA]	affects^binding|decreases^activity|decreases^expression|decreases^reaction	15781755
2-chloro-5-nitrobenzanilide	C457499		CD1A	909	Homo sapiens	9606	2-chloro-5-nitrobenzanilide inhibits the reaction [alitretinoin results in decreased expression of CD1A protein]	decreases^expression|decreases^reaction	17475839
2-chloro-5-nitrobenzanilide	C457499		CD36	948	Homo sapiens	9606	2-chloro-5-nitrobenzanilide inhibits the reaction [alitretinoin results in decreased expression of CD36 protein]	decreases^expression|decreases^reaction	17475839
2-chloro-5-nitrobenzanilide	C457499		CD80	941	Homo sapiens	9606	2-chloro-5-nitrobenzanilide inhibits the reaction [alitretinoin results in decreased expression of CD80 protein]	decreases^expression|decreases^reaction	17475839
2-chloro-5-nitrobenzanilide	C457499		CD86	942	Homo sapiens	9606	2-chloro-5-nitrobenzanilide inhibits the reaction [alitretinoin results in increased expression of CD86 protein]	decreases^reaction|increases^expression	17475839
2-chloro-5-nitrobenzanilide	C457499		CDKN1A	1026	Homo sapiens	9606	2-chloro-5-nitrobenzanilide inhibits the reaction [1,1-bis(3'-indolyl)-1-(4-trifluoromethylphenyl)methane results in increased expression of CDKN1A protein]	decreases^reaction|increases^expression	15345676
2-chloro-5-nitrobenzanilide	C457499		FABP1	2168	Homo sapiens	9606	2-chloro-5-nitrobenzanilide inhibits the reaction [sulindac sulfide analog results in increased expression of FABP1 protein]	decreases^reaction|increases^expression	17602619
2-chloro-5-nitrobenzanilide	C457499		FABP4	2167	Homo sapiens	9606	2-chloro-5-nitrobenzanilide inhibits the reaction [sulindac sulfide analog results in increased expression of FABP4 protein]	decreases^reaction|increases^expression	17602619
2-chloro-5-nitrobenzanilide	C457499		FADS2	9415	Homo sapiens	9606	[2-chloro-5-nitrobenzanilide results in decreased activity of PPARG protein] inhibits the reaction [Amiodarone results in increased expression of FADS2 mRNA]	decreases^activity|decreases^reaction|increases^expression	21123845
2-chloro-5-nitrobenzanilide	C457499		FN1	2335	Homo sapiens	9606	2-chloro-5-nitrobenzanilide inhibits the reaction [rosiglitazone results in decreased expression of FN1 protein]	decreases^expression|decreases^reaction	15908479
2-chloro-5-nitrobenzanilide	C457499		IL10	3586	Homo sapiens	9606	2-chloro-5-nitrobenzanilide inhibits the reaction [Lipopolysaccharides results in increased secretion of IL10 protein]	decreases^reaction|increases^secretion	17475839
2-chloro-5-nitrobenzanilide	C457499		IL12A	3592	Homo sapiens	9606	2-chloro-5-nitrobenzanilide inhibits the reaction [Lipopolysaccharides results in increased secretion of [IL12A protein binds to IL12B protein]]	affects^binding|decreases^reaction|increases^secretion	17475839
2-chloro-5-nitrobenzanilide	C457499		IL12B	3593	Homo sapiens	9606	2-chloro-5-nitrobenzanilide inhibits the reaction [Lipopolysaccharides results in increased secretion of [IL12A protein binds to IL12B protein]]	affects^binding|decreases^reaction|increases^secretion	17475839
2-chloro-5-nitrobenzanilide	C457499		IL8	3576	Homo sapiens	9606	2-chloro-5-nitrobenzanilide promotes the reaction [deoxynivalenol results in decreased degradation of IL8 mRNA]	decreases^degradation|increases^reaction	18485432
2-chloro-5-nitrobenzanilide	C457499		MMP9	4318	Homo sapiens	9606	2-chloro-5-nitrobenzanilide inhibits the reaction [pioglitazone inhibits the reaction [Tetradecanoylphorbol Acetate results in increased activity of MMP9 protein]]	decreases^reaction|increases^activity	17055343
2-chloro-5-nitrobenzanilide	C457499		PPARA	5465	Homo sapiens	9606	2-chloro-5-nitrobenzanilide inhibits the reaction [perfluorooctanoic acid results in increased activity of PPARA protein]	decreases^reaction|increases^activity	17047030
[truncated: 103,014 more rows]

## Sheet: CDA
# ChemicalName	ChemicalID	CasRN	DiseaseName	DiseaseID	DirectEvidence	OmimIDs	PubMedIDs
[truncated: 69,932 more rows]

## Sheet: GDA
# GeneSymbol	GeneID	DiseaseName	DiseaseID	DirectEvidence	OmimIDs	PubMedIDs
[truncated: 16,671 more rows]
